# Supplementary material for: Screening of potential inhibitors targeting the main protease structure of SARS-CoV-2 via molecular docking
Source: Front Pharmacol. 2022 Oct 5;13:962863. doi: 10.3389/fphar.2022.962863 (PMC9579442; doi:10.3389/fphar.2022.962863)
Supplement: Supplementary file 3 [file Table1.XLSX]

## Sheet: 8773mols
id1	title	score	name	id2	weight	weight2	h-num	molecular formula	generic_name	q1	q2	q3	q4	q5
7506	dbank_007506	-10.7	5282330	DB12983	514.552	514.165	6	C32H18N8	Phthalocyanine	investigational	investigational
1640	dbank_001640	-10.5	3035817	DB02152	467.473	467.148	4	C27H21N3O5	K-252a	experimental	experimental
7134	dbank_007134	-10.5	46215462	DB12411	506.658	506.291	7	C30H34N8	R-428	investigational	investigational
6996	dbank_006996	-10.4	56934415	DB12225	659.838	659.314	7	C36H45N5O5S	Beclabuvir	investigational	investigational
4134	dbank_004134	-10	176167	DB06486	515.617	515.232	4	C32H29N5O2	Enzastaurin	investigational	investigational
6605	dbank_006605	-10	51039094	DB11652	480.532	480.202	8	C26H24N8O2	Tucatinib	investigational	investigational
8467	dbank_008467	-10	121301049	DB14894	559.47	559.125	7	C28H21F4NO7	Galicaftor	investigational	investigational
185	dbank_000185	-9.9	10531	DB00320	583.677	583.279	6	C33H37N5O5	Dihydroergotamine	approved; investigational	approved	investigational
3746	dbank_003746	-9.9	644241	DB04868	529.516	529.184	6	C28H22F3N7O	Nilotinib	approved; investigational	approved	investigational
7590	dbank_007590	-9.9	76958312	DB13109	488.552	488.228	9	C25H28N8O3	PKI-179	investigational	investigational
4172	dbank_004172	-9.8	9829523	DB06595	570.649	570.227	4	C35H30N4O4	Midostaurin	approved; investigational	approved	investigational
6784	dbank_006784	-9.8	10029385	DB11913	512.545	512.197	4	C28H25FN6O3	LY-2090314	investigational	investigational
495	dbank_000495	-9.7	8223	DB00696	581.662	581.264	6	C33H35N5O5	Ergotamine	approved	approved
5295	dbank_005295	-9.7	25113181	DB07969	388.386	388.151	5	C20H19F3N4O	3-[3-(4-methylpiperazin-1-yl)-7-(trifluoromethyl)quinoxalin-5-yl]phenol	experimental	experimental
7074	dbank_007074	-9.7	16063245	DB12323	530.515	530.179	7	C27H21F3N8O	Radotinib	investigational	investigational
7547	dbank_007547	-9.7	104903	DB13050	624.874	624.415	8	C38H52N6O2	Tirilazad	investigational	investigational
6698	dbank_006698	-9.6	25145656	DB11791	412.428	412.145	5	C23H17FN6O	Capmatinib	approved; investigational	approved	investigational
6705	dbank_006705	-9.6	90311989	DB11799	449.386	449.12	6	C21H18F3N3O5	Bictegravir	approved; investigational	approved	investigational
7144	dbank_007144	-9.6	25019940	DB12424	557.602	557.224	5	C31H29F2N5O3	MK-3207	investigational	investigational
7959	dbank_007959	-9.6	21158560	DB13648	666.909	666.392	4	C44H50N4O2	Alcuronium	experimental	experimental
598	dbank_000598	-9.5	110635	DB00820	389.404	389.138	4	C22H19N3O4	Tadalafil	approved; investigational	approved	investigational
3084	dbank_003084	-9.5	656932	DB04016	670.689	670.223	6	C40H35N2O6P	2-[3-({Methyl[1-(2-Naphthoyl)Piperidin-4-Yl]Amino}Carbonyl)-2-Naphthyl]-1-(1-Naphthyl)-2-Oxoethylphosphonic Acid	experimental	experimental
4351	dbank_004351	-9.5	16046126	DB06888	403.434	403.164	6	C22H21N5O3	(13R,15S)-13-METHYL-16-OXA-8,9,12,22,24-PENTAAZAHEXACYCLO[15.6.2.16,9.1,12,15.0,2,7.0,21,25]HEPTACOSA-1(24),2,4,6,17(25),18,20-HEPTAENE-23,26-DIONE	experimental	experimental
6610	dbank_006610	-9.5	17755052	DB11663	513.636	513.162	8	C23H27N7O3S2	Pictilisib	investigational	investigational
6747	dbank_006747	-9.5	46861623	DB11863	545.54	545.134	6	C25H22F3N5O4S	Alvelestat	investigational	investigational
6979	dbank_006979	-9.5	11494412	DB12200	369.424	369.148	2	C23H19N3O2	Tivantinib	investigational	investigational
7337	dbank_007337	-9.5	10026128	DB12719	438.466	438.175	2	C25H24F2N2O3	Turofexorate isopropyl	investigational	investigational
8704	dbank_008704	-9.5	118323590	DB15401	580.418	579.103	7	C26H23BrFN7O3	Danicopan	investigational	investigational
934	dbank_000934	-9.4	31101	DB01200	654.595	653.221	6	C32H40BrN5O5	Bromocriptine	approved; investigational	approved	investigational
1056	dbank_001056	-9.4	68723	DB01419	588.543	588.196	5	C30H26F6N4O2	Antrafenine	approved	approved
2484	dbank_002484	-9.4	448408	DB03231	499.544	499.143	9	C25H21N7O3S	3-(5-Amino-7-oxo-3,7-dihydro-2H-[1,2,3]triazolo[4,5-d]pyrimidin-2-yl)-N-(2-{[2-(hydroxymethyl)phenyl]sulfanyl}benzyl)benzamide	experimental	experimental
2548	dbank_002548	-9.4	448662	DB03311	741.448	738.875	7	C26H19Br2N3O7S3	3-(3,5-Dibromo-4-Hydroxy-Benzoyl)-2-Ethyl-Benzofuran-6-Sulfonic Acid [4-(Thiazol-2-Ylsulfamoyl)-Phenyl]-Amide	experimental	experimental
3330	dbank_003330	-9.4	5287508	DB04330	608.449	607.037	8	C29H19Cl2N3O6S	Bilh 434	experimental	experimental
4462	dbank_004462	-9.4	22479942	DB07020	370.364	370.118	4	C20H14N6O2	N-{3-[5-(1H-1,2,4-triazol-3-yl)-1H-indazol-3-yl]phenyl}furan-2-carboxamide	experimental	experimental
5435	dbank_005435	-9.4	5288710	DB08124	393.416	393.078	5	C20H15N3O4S	3-{[(2,2-dioxido-1,3-dihydro-2-benzothien-5-yl)amino]methylene}-5-(1,3-oxazol-5-yl)-1,3-dihydro-2H-indol-2-one	experimental	experimental
5709	dbank_005709	-9.4	9998128	DB08450	352.392	352.144	5	C21H16N6	N-1H-indazol-5-yl-2-(6-methylpyridin-2-yl)quinazolin-4-amine	experimental	experimental
8651	dbank_008651	-9.4	86582336	DB15291	572.613	572.224	4	C32H30F2N4O4	BMS-986142	investigational	investigational
645	dbank_000645	-9.3	151171	DB00872	498.574	498.206	3	C32H26N4O2	Conivaptan	approved; investigational	approved	investigational
1479	dbank_001479	-9.3	447725	DB01948	487.368	486.108	2	C26H22Cl2F2N2O	1-(2,6-Dichlorophenyl)-5-(2,4-Difluorophenyl)-7-Piperidin-4-Yl-3,4-Dihydroquinolin-2(1h)-One	experimental	experimental
1901	dbank_001901	-9.3	170119	DB02483	687.447	687.109	14	C23H27N7O14P2	Etheno-NAD	experimental	experimental
4191	dbank_004191	-9.3	11556427	DB06630	637.518	637.167	2	C30H25F10NO3	Anacetrapib	investigational	investigational
5907	dbank_005907	-9.3	447446	DB08683	393.394	393.111	3	C24H15N3O3	REL-(9R,12S)-9,10,11,12-TETRAHYDRO-9,12-EPOXY-1H-DIINDOLO[1,2,3-FG:3',2',1'-KL]PYRROLO[3,4-I][1,6]BENZODIAZOCINE-1,3(2H)-DIONE	experimental	experimental
6084	dbank_006084	-9.3	11707110	DB08911	615.395	615.078	5	C26H23FIN5O4	Trametinib	approved	approved
7524	dbank_007524	-9.3	5281051	DB13014	504.443	504.085	8	C30H16O8	Hypericin	investigational	investigational
8455	dbank_008455	-9.3	58438464	DB14870	512.68	512.236	5	C29H32N6OS	PF-5190457	investigational	investigational
8546	dbank_008546	-9.3	91758792	DB15085	487.391	487.099	6	C23H16F3N3O6	Fulacimstat	investigational	investigational
549	dbank_000549	-9.2	60838	DB00762	586.678	586.279	6	C33H38N4O6	Irinotecan	approved; investigational	approved	investigational
3790	dbank_003790	-9.2	159324	DB04960	489.396	488.117	3	C27H22Cl2N4O	Tipifarnib	investigational	investigational
3972	dbank_003972	-9.2	11656518	DB05984	518.423	518.129	4	C24H16F6N6O	RAF-265	investigational	investigational
4548	dbank_004548	-9.2	10072851	DB07117	458.469	458.17	7	C24H22N6O4	5-(4-PHENOXYPHENYL)-5-(4-PYRIMIDIN-2-YLPIPERAZIN-1-YL)PYRIMIDINE-2,4,6(2H,3H)-TRIONE	experimental	experimental
4681	dbank_004681	-9.2	9978312	DB07265	400.384	400.106	5	C23H16N2O5	3-(9-HYDROXY-1,3-DIOXO-4-PHENYL-2,3-DIHYDROPYRROLO[3,4-C]CARBAZOL-6(1H)-YL)PROPANOIC ACID	experimental	experimental
6802	dbank_006802	-9.2	71481097	DB11942	443.313	443.093	6	C17H11F6N7O	Selinexor	approved; investigational	approved	investigational
6832	dbank_006832	-9.2	25141092	DB11986	560.65	560.271	6	C31H34F2N6O2	Entrectinib	approved; investigational	approved	investigational
6983	dbank_006983	-9.2	71492799	DB12207	442.325	442.098	5	C18H12F6N6O	Verdinexor	investigational	investigational
7110	dbank_007110	-9.2	44603533	DB12381	552.531	552.172	4	C30H22F2N6O3	Merestinib	investigational	investigational
7388	dbank_007388	-9.2	6450806	DB12799	584.72	584.279	5	C37H36N4O3	Laniquidar	investigational	investigational
7447	dbank_007447	-9.2	73774610	DB12895	648.64	648.181	12	C28H30F2N6O8S	TD-139	investigational	investigational
7519	dbank_007519	-9.2	25066467	DB13005	553.587	553.224	7	C30H28FN7O3	Rebastinib	investigational	investigational
8416	dbank_008416	-9.2	89670174	DB14773	478.431	478.125	4	C25H17F3N4O3	Lifirafenib	investigational	investigational
8420	dbank_008420	-9.2	86567195	DB14785	664.811	664.349	9	C37H44N8O4	Fenebrutinib	investigational	investigational
8442	dbank_008442	-9.2	58507717	DB14846	411.389	411.163	9	C17H20F3N7O2	Bimiralisib	investigational	investigational
8524	dbank_008524	-9.2	42639643	DB15039	507.573	507.218	6	C29H26FN7O	ITI-214	investigational	investigational
429	dbank_000429	-9.1	5291	DB00619	493.603	493.259	7	C29H31N7O	Imatinib	approved	approved
911	dbank_000911	-9.1	42890	DB01177	497.494	497.169	10	C26H27NO9	Idarubicin	approved	approved
1339	dbank_001339	-9.1	447721	DB01761	506.565	506.241	5	C28H29F3N6	4-[5-[2-(1-Phenyl-Ethylamino)-Pyrimidin-4-Yl]-1-Methyl-4-(3-Trifluoromethylphenyl)-1h-Imidazol-2-Yl]-Piperidine	experimental	experimental
1611	dbank_001611	-9.1	448062	DB02112	489.611	489.253	5	C31H31N5O	Zk-806450	experimental	experimental
2745	dbank_002745	-9.1	5289321	DB03583	441.5	441.136	6	C22H23N3O5S	(2E,3S)-3-hydroxy-5'-[(4-hydroxypiperidin-1-yl)sulfonyl]-3-methyl-1,3-dihydro-2,3'-biindol-2'(1'H)-one	experimental	experimental
2917	dbank_002917	-9.1	5287617	DB03802	439.592	439.262	4	C29H33N3O	1-[4-(Octahydro-Pyrido[1,2-a]Pyrazin-2-Yl)-Phenyl]-2-Phenyl-1,2,3,4-Tetrahydro-Isoquinolin-6-Ol	experimental	experimental
4124	dbank_004124	-9.1	9932888	DB06469	439.471	439.153	4	C26H21N3O4	Lestaurtinib	investigational	investigational
4196	dbank_004196	-9.1	11635763	DB06638	604.686	604.26	8	C35H33FN6O3	Quarfloxin	investigational	investigational
5318	dbank_005318	-9.1	11633167	DB07994	421.494	421.19	5	C26H23N5O	N~3~-[5-(1H-INDOL-6-YL)-2-(PYRIDIN-2-YLMETHOXY)BENZYL]PYRIDINE-2,3-DIAMINE	experimental	experimental
5352	dbank_005352	-9.1	11987832	DB08031	446.538	446.221	4	C27H30N2O4	N-[(13-CYCLOHEXYL-6,7-DIHYDROINDOLO[1,2-D][1,4]BENZOXAZEPIN-10-YL)CARBONYL]-2-METHYL-L-ALANINE	experimental	experimental
6571	dbank_006571	-9.1	5282430	DB11577	422.389	421.988	10	C16H10N2O8S2	Indigotindisulfonic acid	approved	approved
6584	dbank_006584	-9.1	11965427	DB11611	615.48	614.068	6	C29H24Cl2N2O7S	Lifitegrast	approved	approved
6684	dbank_006684	-9.1	56599306	DB11772	541.02	540.135	8	C25H25ClN6O4S	Pilaralisib	investigational	investigational
6852	dbank_006852	-9.1	24771824	DB12012	455.441	455.157	4	C23H20F3N5O2	PF-04457845	investigational	investigational
8183	dbank_008183	-9.1	22609888	DB13993	397.39	397.146	6	C19H17F2N7O	MRK-409	experimental	experimental
8480	dbank_008480	-9.1	121596701	DB14917	412.51	412.168	7	C20H24N6O2S	Ceralasertib	investigational	investigational
8498	dbank_008498	-9.1	76283707	DB14946	635.66	635.203	7	C29H32F3N5O6S	PCO-371	investigational	investigational
8499	dbank_008499	-9.1	53262401	DB14982	432.531	432.206	5	C27H24N6	Miransertib	investigational	investigational
8641	dbank_008641	-9.1	59534386	DB15269	512.05	511.235	5	C27H34ClN5O3	ALK-4290	investigational	investigational
8692	dbank_008692	-9.1	42636651	DB15367	527.6	527.233	5	C30H30FN5O3	LY-2623091	investigational	investigational
1527	dbank_001527	-9	44259	DB02010	466.531	466.2	4	C28H26N4O3	Staurosporine	experimental	experimental
2217	dbank_002217	-9	6323416	DB02882	364.452	364.169	4	C24H20N4	Cyanocinnoline	experimental	experimental
2356	dbank_002356	-9	657141	DB03067	586.463	586.097	10	C28H18N4O11	4-{2,4-Bis[(3-Nitrobenzoyl)Amino]Phenoxy}Phthalic Acid	experimental	experimental
3641	dbank_003641	-9	4369496	DB04739	479.576	479.243	7	C28H29N7O	4-[(4-METHYL-1-PIPERAZINYL)METHYL]-N-[3-[[4-(3-PYRIDINYL)-2-PYRIMIDINYL]AMINO]PHENYL]-BENZAMIDE	experimental	experimental
4053	dbank_004053	-9	3035016	DB06263	483.473	483.153	10	C25H25NO9	Amrubicin	investigational	investigational
4413	dbank_004413	-9	24941249	DB06963	399.488	399.206	4	C24H25N5O	3-[3-(3-methyl-6-{[(1S)-1-phenylethyl]amino}-1H-pyrazolo[4,3-c]pyridin-1-yl)phenyl]propanamide	experimental	experimental
4850	dbank_004850	-9	448943	DB07456	438.521	438.206	3	C27H26N4O2	3-(1H-indol-3-yl)-4-(1-{2-[(2S)-1-methylpyrrolidinyl]ethyl}-1H-indol-3-yl)-1H-pyrrole-2,5-dione	experimental	experimental
5365	dbank_005365	-9	11974440	DB08044	445.362	445.134	4	C19H17F6N5O	ABT-341	experimental	experimental
5449	dbank_005449	-9	24864079	DB08138	360.29	360.083	3	C17H11F3N4O2	{[(2,6-difluorophenyl)carbonyl]amino}-N-(4-fluorophenyl)-1H-pyrazole-3-carboxamide	experimental	experimental
6334	dbank_006334	-9	16678941	DB09280	452.414	452.118	6	C24H18F2N2O5	Lumacaftor	approved	approved
6345	dbank_006345	-9	48229	DB09295	414.34	414.083	4	C21H13F3N2O4	Talniflumate	experimental	experimental
6613	dbank_006613	-9	16654980	DB11666	410.394	410.168	8	C18H21F3N6O2	Buparlisib	investigational	investigational
6777	dbank_006777	-9	46848036	DB11904	562.601	562.242	8	C29H29F3N8O	Flumatinib	investigational	investigational
6868	dbank_006868	-9	11527495	DB12042	644.88	644.34	5	C37H48N4O4S	Ibodutant	investigational	investigational
7102	dbank_007102	-9	10296883	DB12369	438.481	438.18	6	C25H22N6O2	Sotrastaurin	investigational	investigational
7249	dbank_007249	-9	9916461	DB12580	587.91	587.095	5	C28H16ClF6N5O	Tradipitant	investigational	investigational
7307	dbank_007307	-9	119026214	DB12673	539.433	538.1	5	C29H23BrN4O2	ATX-914	investigational	investigational
7318	dbank_007318	-9	25118925	DB12690	445.426	445.164	5	C21H19F4N7	LY-2584702	investigational	investigational
7344	dbank_007344	-9	25134326	DB12729	580.75	580.294	11	C29H40N8O3S	ASP-3026	investigational	investigational
7455	dbank_007455	-9	11647372	DB12904	417.413	417.172	8	C19H21F2N7O2	ZSTK-474	investigational	investigational
7537	dbank_007537	-9	9919680	DB13029	422.444	422.138	5	C25H18N4O3	MK-0873	investigational	investigational
7736	dbank_007736	-9	107715	DB13345	611.743	611.311	7	C35H41N5O5	Dihydroergocristine	approved; experimental	approved	experimental
8444	dbank_008444	-9	56948249	DB14850	653.581	652.18	6	C34H33BrN6O3	Deleobuvir	investigational	investigational
8463	dbank_008463	-9	135565709	DB14883	505.557	505.203	5	C29H24FN7O	Lorecivivint	investigational	investigational
8506	dbank_008506	-9	118878093	DB15003	389.411	389.178	6	C18H21F2N7O	PF-06700841	investigational	investigational
8513	dbank_008513	-9	53359074	DB15023	531.61	531.174	5	C28H26FN5O3S	BMS-791826	investigational	investigational
8673	dbank_008673	-9	68748835	DB15328	549.554	549.199	5	C29H26F3N5O3	Ubrogepant	approved; investigational	approved	investigational
8701	dbank_008701	-9	71475839	DB15396	532.571	532.22	5	C29H27F3N6O	PF-114	investigational	investigational
1670	dbank_001670	-8.9	5287994	DB02194	439.463	439.153	6	C26H21N3O4	8-Benzyl-2-Hydroxy-2-(4-Hydroxy-Benzyl)-6-(4-Hydroxy-Phenyl)-2h-Imidazo[1,2-a]Pyrazin-3-One	experimental	experimental
1722	dbank_001722	-8.9	448661	DB02259	658.336	655.892	6	C23H18Br2N2O7S2	3-(3,5-Dibromo-4-Hydroxy-Benzoyl)-2-Ethyl-Benzofuran-6-Sulfonic Acid (4-Sulfamoyl-Phenyl)-Amide	experimental	experimental
2040	dbank_002040	-8.9	448024	DB02651	685.447	685.097	8	C29H23F6N3O6P2	{[2-(1h-1,2,3-Benzotriazol-1-Yl)-2-(3,4-Difluorophenyl)Propane-1,3-Diyl]Bis[4,1-Phenylene(Difluoromethylene)]}Bis(Phosphonic Acid)	experimental	experimental
2425	dbank_002425	-8.9	446468	DB03157	647.761	647.176	8	C33H33N3O7S2	N,O-Didansyl-L-Tyrosine	experimental	experimental
2736	dbank_002736	-8.9	448407	DB03571	430.248	429.051	7	C18H13Cl2N7O2	3-(5-amino-7-hydroxy-[1,2,3]triazolo[4,5-d]pyrimidin-2-yl)-N-(3,5-dichlorobenzyl)-benzamide	experimental	experimental
3258	dbank_003258	-8.9	446604	DB04238	508.589	508.178	7	C26H28N4O5S	N-Alpha-(2-Naphthylsulfonyl)-N-(3-Amidino-L-Phenylalaninyl)-D-Pipecolinic Acid	experimental	experimental
3632	dbank_003632	-8.9	5326914	DB04724	536.664	536.279	4	C33H36N4O3	(S)-2-((S)-3-isobutyl-2,5-dioxo-4-quinolin-3-ylmethyl-[1,4]diazepan-1yl)-N-methyl-3-naphtalen-2-yl-propionamide	experimental	experimental
4380	dbank_004380	-8.9	11634458	DB06920	484.907	484.131	4	C24H22ClFN4O4	Eribaxaban	experimental	experimental
4465	dbank_004465	-8.9	15942652	DB07024	403.406	403.073	7	C19H17NO7S	2-(3,4-DIHYDROXYPHENYL)-8-(1,1-DIOXIDOISOTHIAZOLIDIN-2-YL)-3-HYDROXY-6-METHYL-4H-CHROMEN-4-ONE	experimental	experimental
5519	dbank_005519	-8.9	16040281	DB08221	449.428	449.146	5	C24H18F3N5O	N-{4-METHYL-3-[(3-PYRIMIDIN-4-YLPYRIDIN-2-YL)AMINO]PHENYL}-3-(TRIFLUOROMETHYL)BENZAMIDE	experimental	experimental
6149	dbank_006149	-8.9	5281613	DB08995	608.545	608.174	15	C28H32O15	Diosmin	approved; investigational	approved	investigational
6201	dbank_006201	-8.9	10280735	DB09075	548.06	547.177	7	C24H30ClN7O4S	Edoxaban	approved	approved
6604	dbank_006604	-8.9	11977753	DB11651	469.548	469.19	4	C30H23N5O	Dactolisib	investigational	investigational
6708	dbank_006708	-8.9	16007088	DB11804	632.78	632.219	6	C32H38F2N2O5S2	AZD-5672	investigational	investigational
6965	dbank_006965	-8.9	25254071	DB12180	498.601	498.216	10	C23H30N8O3S	Apitolisib	investigational	investigational
7069	dbank_007069	-8.9	10437018	DB12318	530.564	530.219	8	C27H27FN8O3	BMS-599626	investigational	investigational
7098	dbank_007098	-8.9	10275777	DB12364	451.91	451.141	6	C23H22ClN5O3	Betrixaban	approved; investigational	approved	investigational
7364	dbank_007364	-8.9	9810927	DB12760	489.89	489.133	9	C21H21ClFN7O4	GW-493838	investigational	investigational
7398	dbank_007398	-8.9	76685216	DB12817	487.444	487.15	8	C22H22FN5O7	Zoliflodacin	investigational	investigational
7500	dbank_007500	-8.9	23653789	DB12973	555.537	555.201	3	C29H28F7NO2	Serlopitant	investigational	investigational
7592	dbank_007592	-8.9	46911863	DB13113	377.359	377.12	5	C19H13F2N7	JNJ-38877605	investigational	investigational
7983	dbank_007983	-8.9	4257	DB13676	479.07	478.25	4	C28H35ClN4O	Mosapramine	experimental	experimental
8462	dbank_008462	-8.9	24780387	DB14882	418.497	418.2	5	C24H26N4O3	CEP-9722	investigational	investigational
8696	dbank_008696	-8.9	25182860	DB15382	550.63	550.137	7	C25H23FN8O2S2	SAR-125844	investigational	investigational
1291	dbank_001291	-8.8	5280805	DB01698	610.518	610.153	16	C27H30O16	Rutin	approved; experimental; investigational	approved	experimental	investigational
2210	dbank_002210	-8.8	4630909	DB02873	489.345	488.098	3	C24H20Cl2F2N4O	1-(2,6-Dichlorophenyl)-5-(2,4-Difluorophenyl)-7-Piperazin-1-Yl-3,4-Dihydroquinazolin-2(1h)-One	experimental	experimental
3190	dbank_003190	-8.8	5287936	DB04154	343.382	343.143	4	C20H17N5O	N-Methyl-N-[3-(6-Phenyl[1,2,4]Triazolo[4,3-B]Pyridazin-3-Yl)Phenyl]Acetamide	experimental	experimental
3402	dbank_003402	-8.8	4470378	DB04432	398.386	398.143	4	C20H18F2N5O2	ZK-805623	experimental	experimental
3611	dbank_003611	-8.8	6102777	DB04698	343.317	343.038	8	C14H9N5O4S	N-(1,4-dihydro-5H-tetrazol-5-ylidene)-9-oxo-9H-xanthene-2-sulfonamide	experimental	experimental
3616	dbank_003616	-8.8	10621	DB04703	610.561	610.19	15	C28H34O15	Hesperidin	approved; investigational	approved	investigational
3835	dbank_003835	-8.8	24771867	DB05220	518.93	518.116	8	C27H20ClFN4O4	Alisertib	investigational	investigational
4011	dbank_004011	-8.8	130731	DB06178	573.56	573.208	13	C27H27N9O6	Talotrexin	investigational	investigational
4293	dbank_004293	-8.8	54671008	DB06817	444.416	444.156	7	C20H21FN6O5	Raltegravir	approved	approved
4451	dbank_004451	-8.8	10364585	DB07006	416.426	416.137	5	C24H20N2O5	9-HYDROXY-6-(3-HYDROXYPROPYL)-4-(2-METHOXYPHENYL)PYRROLO[3,4-C]CARBAZOLE-1,3(2H,6H)-DIONE	experimental	experimental
4720	dbank_004720	-8.8	24941253	DB07307	393.48	393.184	3	C26H23N3O	N-cyclopropyl-4-methyl-3-[1-(2-methylphenyl)phthalazin-6-yl]benzamide	experimental	experimental
4733	dbank_004733	-8.8	6102821	DB07321	480.321	479.011	6	C20H15Cl2N3O5S	2,5-DICHLORO-N-[5-METHOXY-7-(6-METHOXYPYRIDIN-3-YL)-1,3-BENZOXAZOL-2-YL]BENZENESULFONAMIDE	experimental	experimental
4947	dbank_004947	-8.8	4369534	DB07570	446.538	446.221	4	C27H30N2O4	3-CYCLOHEXYL-1-(2-MORPHOLIN-4-YL-2-OXOETHYL)-2-PHENYL-1H-INDOLE-6-CARBOXYLIC ACID	experimental	experimental
5358	dbank_005358	-8.8	11655511	DB08037	459.504	459.213	3	C25H28F3N3O2	(2S)-4-(2,5-difluorophenyl)-N-[(3R,4S)-3-fluoro-1-methylpiperidin-4-yl]-2-(hydroxymethyl)-N-methyl-2-phenyl-2,5-dihydro-1H-pyrrole-1-carboxamide	experimental	experimental
5474	dbank_005474	-8.8	16058650	DB08164	462.488	462.134	6	C22H21F3N4O2S	(3R,4R)-1-{6-[3-(METHYLSULFONYL)PHENYL]PYRIMIDIN-4-YL}-4-(2,4,5-TRIFLUOROPHENYL)PIPERIDIN-3-AMINE	experimental	experimental
5622	dbank_005622	-8.8	42647297	DB08349	449.453	449.166	4	C24H21F2N5O2	N-cyclopropyl-3-{[1-(2,4-difluorophenyl)-7-methyl-6-oxo-6,7-dihydro-1H-pyrazolo[3,4-b]pyridin-4-yl]amino}-4-methylbenzamide	experimental	experimental
5900	dbank_005900	-8.8	23646577	DB08674	435.477	435.17	4	C26H21N5O2	(20S)-19,20,21,22-TETRAHYDRO-19-OXO-5H-18,20-ETHANO-12,14-ETHENO-6,10-METHENO-18H-BENZ[D]IMIDAZO[4,3-K][1,6,9,12]OXATRIAZA-CYCLOOCTADECOSINE-9-CARBONITRILE	experimental	experimental
5923	dbank_005923	-8.8	25203955	DB08703	424.491	424.179	4	C27H24N2O3	12-(2-hydroxyethyl)-2-(1-methylethoxy)-13,14-dihydronaphtho[2,1-a]pyrrolo[3,4-c]carbazol-5(12H)-one	experimental	experimental
6026	dbank_006026	-8.8	213046	DB08815	492.676	492.256	5	C28H36N4O2S	Lurasidone	approved; investigational	approved	investigational
6177	dbank_006177	-8.8	10077130	DB09030	492.582	492.242	3	C29H33FN2O4	Vorapaxar	approved	approved
6443	dbank_006443	-8.8	168871	DB11273	563.699	563.311	6	C31H41N5O5	Dihydroergocornine	approved	approved
6540	dbank_006540	-8.8	25273230	DB11491	385.364	385.124	6	C20H17F2N3O3	Sarafloxacin	vet_approved; withdrawn	vet_approved	withdrawn
6632	dbank_006632	-8.8	54732242	DB11691	570.646	570.248	8	C32H34N4O6	Naldemedine	approved; investigational	approved	investigational
6637	dbank_006637	-8.8	46216796	DB11697	472.589	472.247	7	C28H32N4O3	Pacritinib	investigational	investigational
6730	dbank_006730	-8.8	10366136	DB11832	443.551	443.232	6	C26H29N5O2	Crenolanib	investigational	investigational
6826	dbank_006826	-8.8	16118392	DB11977	633.701	633.288	6	C33H37F2N7O4	Golvatinib	investigational	investigational
6870	dbank_006870	-8.8	11570626	DB12044	588.49	587.138	5	C32H27Cl2N3O4	MK-0893	investigational	investigational
6978	dbank_006978	-8.8	24872952	DB12198	574.537	574.184	5	C29H30F3N2O5P	Fosdagrocorat	investigational	investigational
7032	dbank_007032	-8.8	42641863	DB12272	609.49	608.095	5	C28H27Cl2FN2O6S	Vidupiprant	investigational	investigational
7039	dbank_007039	-8.8	25117126	DB12282	510.5	510.141	9	C20H21F3N8O3S	Defactinib	investigational	investigational
7101	dbank_007101	-8.8	46202416	DB12368	431.422	431.136	5	C24H16F3N5	AZD-3839	investigational	investigational
7153	dbank_007153	-8.8	16401639	DB12434	642.739	642.325	13	C32H50O13	Steviolbioside	approved; investigational	approved	investigational
7241	dbank_007241	-8.8	9800765	DB12571	394.45	394.181	5	C22H23FN4O2	Rimacalib	investigational	investigational
7279	dbank_007279	-8.8	10224267	DB12635	425.528	425.199	3	C28H27NO3	Aleplasinin	investigational	investigational
7449	dbank_007449	-8.8	46207733	DB12897	399.494	399.195	4	C25H25N3O2	MK-7622	investigational	investigational
7508	dbank_007508	-8.8	46912230	DB12986	354.418	354.192	8	C17H22N8O	VS-5584	investigational	investigational
7845	dbank_007845	-8.8	3087722	DB13490	652.602	652.2	16	C30H36O16	Hidrosmin	experimental	experimental
8384	dbank_008384	-8.8	63046	DB14703	576.63	576.183	8	C29H33FO9S	Dexamethasone metasulfobenzoate	approved; experimental	approved	experimental
8438	dbank_008438	-8.8	71584930	DB14840	510.367	509.086	4	C24H21BrFN5O2	Ripretinib	investigational	investigational
8602	dbank_008602	-8.8	5279172	DB15197	388.402	388.134	3	C22H17FN4O2	RSV-604	investigational	investigational
8629	dbank_008629	-8.8	11678534	DB15242	527.496	527.156	6	C28H24F3NO6	MK-0533	investigational	investigational
8654	dbank_008654	-8.8	16750271	DB15294	462.55	462.227	7	C26H30N4O4	SB-1578	investigational	investigational
8664	dbank_008664	-8.8	54766013	DB15310	399.433	399.161	5	C22H18FN7	Vactosertib	investigational	investigational
866	dbank_000866	-8.7	6918296	DB01126	528.53	528.221	2	C27H30F6N2O2	Dutasteride	approved; investigational	approved	investigational
1363	dbank_001363	-8.7	164908	DB01792	653.387	653.088	16	C19H25N7O15P2	Adenylyl-(3'-5')-uridine 3'-monophosphate	experimental	experimental
2752	dbank_002752	-8.7	447523	DB03591	613.589	613.215	6	C31H34F2N3O6P	RU82209	experimental	experimental
2787	dbank_002787	-8.7	5287468	DB03642	526.605	526.189	6	C26H30N4O6S	N-[(2S)-4-Methyl-1-oxo-1-{[(4S)-3-oxo-1-(2-pyridinylsulfonyl)-4-azepanyl]amino}-2-pentanyl]-1-benzofuran-2-carboxamide	experimental	experimental
2896	dbank_002896	-8.7	2396	DB03777	412.484	412.19	3	C25H24N4O2	Rbt205 Inhibitor	experimental	experimental
2975	dbank_002975	-8.7	4327	DB03878	382.418	382.154	6	C22H18N6O	N-[4-Methyl-3-[[4-(3-Pyridinyl)-2-Pyrimidinyl]Amino]Phenyl]-3-Pyridinecarboxamide	experimental	experimental
3635	dbank_003635	-8.7	5326956	DB04727	537.465	537.142	5	C27H19F4N5O3	1-{4-[4-Amino-6-(4-methoxyphenyl)furo[2,3-d]pyrimidin-5-yl]phenyl}-3-[2-fluoro-5-(trifluoromethyl)phenyl]urea	experimental	experimental
3725	dbank_003725	-8.7	3396	DB04842	475.573	475.244	3	C29H31F2N3O	Fluspirilene	approved; investigational	approved	investigational
3756	dbank_003756	-8.7	9808998	DB04882	608.56	608.175	12	C29H28N4O11	Edotecarin	investigational	investigational
3902	dbank_003902	-8.7	11273179	DB05553	532.45	532.147	10	C22H25N6O8P	Regrelor	investigational	investigational
3911	dbank_003911	-8.7	5327686	DB05608	400.394	400.117	4	C22H16N4O4	MKC-1	investigational	investigational
3948	dbank_003948	-8.7	71587684	DB05835	495.183	493.993	4	C16H9BrF6N6O	NS-3728	investigational	investigational
4005	dbank_004005	-8.7	213022	DB06163	532.536	532.198	10	C26H25FN8O4	Plevitrexed	investigational	investigational
4393	dbank_004393	-8.7	16750106	DB06933	432.538	432.162	5	C24H24N4O2S	N-(tert-butyl)-4-[5-(pyridin-2-ylamino)quinolin-3-yl]benzenesulfonamide	experimental	experimental
4467	dbank_004467	-8.7	11987860	DB07026	383.398	383.148	5	C20H21N3O5	(1S,5S,7R)-N~7~-(BIPHENYL-4-YLMETHYL)-N~3~-HYDROXY-6,8-DIOXA-3-AZABICYCLO[3.2.1]OCTANE-3,7-DICARBOXAMIDE	experimental	experimental
4646	dbank_004646	-8.7	24778473	DB07226	389.791	389.057	3	C21H12ClN3O3	N-[4-(2-CHLOROPHENYL)-1,3-DIOXO-1,2,3,6-TETRAHYDROPYRROLO[3,4-C]CARBAZOL-9-YL]FORMAMIDE	experimental	experimental
4682	dbank_004682	-8.7	10267580	DB07267	313.356	313.133	5	C19H15N5	2-(6-methylpyridin-2-yl)-N-pyridin-4-ylquinazolin-4-amine	experimental	experimental
4751	dbank_004751	-8.7	210332	DB07340	393.485	393.228	7	C21H27N7O	N~6~-cyclohexyl-N~2~-(4-morpholin-4-ylphenyl)-9H-purine-2,6-diamine	experimental	experimental
4844	dbank_004844	-8.7	447950	DB07450	449.202	447.987	4	C19H11BrF2N2O4	(R)-minalrestat	experimental	experimental
4852	dbank_004852	-8.7	448642	DB07458	438.521	438.206	4	C27H26N4O2	3-(1H-indol-3-yl)-4-{1-[2-(1-methylpyrrolidin-2-yl)ethyl]-1H-indol-3-yl}-1H-pyrrole-2,5-dione	experimental	experimental
5138	dbank_005138	-8.7	53338808	DB07794	327.343	327.123	5	C18H13N7	5-(2-PHENYLPYRAZOLO[1,5-A]PYRIDIN-3-YL)-1H-PYRAZOLO[3,4-C]PYRIDAZIN-3-AMINE	experimental	experimental
5296	dbank_005296	-8.7	24875320	DB07970	414.38	414.13	4	C21H17F3N4O2	5-[(2-methyl-5-{[3-(trifluoromethyl)phenyl]carbamoyl}phenyl)amino]pyridine-3-carboxamide	experimental	experimental
5357	dbank_005357	-8.7	3815	DB08036	311.337	311.106	1	C20H13N3O	6,7,12,13-tetrahydro-5H-indolo[2,3-a]pyrrolo[3,4-c]carbazol-5-one	experimental	experimental
5711	dbank_005711	-8.7	6419766	DB08454	301.345	301.133	4	C18H15N5	N-(5-METHYL-1H-PYRAZOL-3-YL)-2-PHENYLQUINAZOLIN-4-AMINE	experimental	experimental
6055	dbank_006055	-8.7	104787	DB08861	645.79	645.229	8	C30H39N5O7S2	DPDPE	experimental	experimental
6068	dbank_006068	-8.7	9924495	DB08883	349.393	349.122	3	C23H15N3O	Perampanel	approved	approved
6093	dbank_006093	-8.7	54726191	DB08930	419.379	419.129	6	C20H19F2N3O5	Dolutegravir	approved	approved
6491	dbank_006491	-8.7	9917862	DB11399	674.724	674.25	4	C40H33F3N4O3	Dirlotapide	investigational; vet_approved	investigational	vet_approved
6585	dbank_006585	-8.7	133017	DB11614	415.97	415.182	3	C26H26ClN3	Rupatadine	approved	approved
6709	dbank_006709	-8.7	10302451	DB11805	542.026	541.209	10	C27H32ClN5O5	Saracatinib	investigational	investigational
6727	dbank_006727	-8.7	153999	DB11829	468.547	468.216	4	C28H28N4O3	Ruboxistaurin	investigational	investigational
6758	dbank_006758	-8.7	57336276	DB11877	445.47	445.111	6	C21H20FN3O5S	Basmisanil	investigational	investigational
6925	dbank_006925	-8.7	59473233	DB12121	411.459	411.181	6	C23H21N7O	Entospletinib	investigational	investigational
7133	dbank_007133	-8.7	151897	DB12410	643.635	643.226	14	C32H37NO13	Sabarubicin	investigational	investigational
7166	dbank_007166	-8.7	51049968	DB12457	534.568	534.219	5	C28H28F2N6O3	Rimegepant	investigational	investigational
7282	dbank_007282	-8.7	46208720	DB12640	479.96	479.14	3	C29H22ClN3O2	CP-609754	investigational	investigational
7323	dbank_007323	-8.7	25167777	DB12703	505.496	505.102	7	C25H17F2N5O3S	Omipalisib	investigational	investigational
7512	dbank_007512	-8.7	5281800	DB12996	624.587	624.205	14	C29H36O15	Acteoside	investigational	investigational
8305	dbank_008305	-8.7	223253	DB14541	486.649	486.298	5	C29H42O6	Hydrocortisone cypionate	approved; investigational; vet_approved	approved	investigational	vet_approved
8441	dbank_008441	-8.7	49831257	DB14845	425.51	425.152	6	C21H23N5O3S	Filgotinib	investigational	investigational
8528	dbank_008528	-8.7	52913524	DB15048	416.47	416.184	7	C23H28O7	Licogliflozin	investigational	investigational
8557	dbank_008557	-8.7	52920501	DB15106	480.59	480.194	6	C24H28N6O3S	Surufatinib	investigational	investigational
8572	dbank_008572	-8.7	25171648	DB15133	492.583	492.227	7	C29H28N6O2	Tepotinib	investigational	investigational
8632	dbank_008632	-8.7	59215954	DB15247	439.491	439.202	3	C23H26FN5O3	Vorolanib	investigational	investigational
621	dbank_000621	-8.6	2794	DB00845	473.396	472.122	4	C27H22Cl2N4	Clofazimine	approved; investigational	approved	investigational
845	dbank_000845	-8.6	16362	DB01100	461.546	461.228	2	C28H29F2N3O	Pimozide	approved	approved
1044	dbank_001044	-8.6	60021	DB01405	417.381	417.13	6	C21H18F3N3O3	Temafloxacin	withdrawn	withdrawn
1348	dbank_001348	-8.6	448238	DB01772	409.41	409.144	5	C22H20FN3O4	3-[3-(2,3-Dihydroxy-Propylamino)-Phenyl]-4-(5-Fluoro-1-Methyl-1h-Indol-3-Yl)-Pyrrole-2,5-Dione	experimental	experimental
1616	dbank_001616	-8.6	448940	DB02118	372.438	372.114	4	C19H20N2O4S	CP-271485	experimental	experimental
1643	dbank_001643	-8.6	448327	DB02155	560.637	560.252	7	C32H36N2O7	3-[(3-sec-butyl-4-hydroxybenzoyl)amino]azepan-4-yl 4-(2-hydroxy-5-methoxybenzoyl)benzoate	experimental	experimental
1964	dbank_001964	-8.6	445114	DB02557	543.504	543.198	9	C23H34N3O10P	Phosphoramidon	experimental	experimental
2075	dbank_002075	-8.6	4310	DB02698	415.319	415.067	5	C21H12F3NO5	N-(M-Trifluoromethylphenyl) Phenoxazine-4,6-Dicarboxylic Acid	experimental	experimental
2176	dbank_002176	-8.6	447546	DB02830	446.502	446.207	4	C24H26N6O3	FR236913	experimental	experimental
2368	dbank_002368	-8.6	177837	DB03081	601.714	601.257	9	C29H39N5O7S	[N-[N-(4-Methoxy-2,3,6-trimethylphenylsulfonyl)-L-aspartyl]-D-(4-amidino-phenylalanyl)]-piperidine	experimental	experimental
2522	dbank_002522	-8.6	657098	DB03276	688.75	688.303	7	C37H45N4O7P	4-[(10s,14s,18s)-18-(2-Amino-2-Oxoethyl)-14-(1-Naphthylmethyl)-8,17,20-Trioxo-7,16,19-Triazaspiro[5.14]Icos-11-En-10-Yl]Benzylphosphonic Acid	experimental	experimental
2538	dbank_002538	-8.6	4369128	DB03300	700.53	700.054	16	C19H26N8O13P2S2	Pterin Cytosine Dinucleotide	experimental	experimental
3383	dbank_003383	-8.6	448384	DB04405	471.501	471.168	6	C28H25NO6	2-[2-(1,3-Dioxo-1,3-Dihydro-2h-Isoindol-2-Yl)Ethyl]-4-(4'-Ethoxy-1,1'-Biphenyl-4-Yl)-4-Oxobutanoic Acid	experimental	experimental
3542	dbank_003542	-8.6	4369491	DB04608	328.321	328.085	3	C20H12N2O3	9-HYDROXY-4-PHENYL-6H-PYRROLO[3,4-C]CARBAZOLE-1,3-DIONE	experimental	experimental
3627	dbank_003627	-8.6	5494425	DB04716	309.337	309.128	2	C18H16FN3O	2-(1,1-DIMETHYLETHYL)9-FLUORO-3,6-DIHYDRO-7H-BENZ[H]-IMIDAZ[4,5-F]ISOQUINOLIN-7-ONE	experimental	experimental
3748	dbank_003748	-8.6	219077	DB04872	606.625	605.258	3	C35H41Cl2N3O2	Osanetant	investigational	investigational
3824	dbank_003824	-8.6	5362259	DB05129	653.63	653.211	12	C33H35NO13	Elsamitrucin	investigational	investigational
3901	dbank_003901	-8.6	10427712	DB05552	346.35	346.118	8	C18H14N6O2	TG100-115	investigational	investigational
3905	dbank_003905	-8.6	11667893	DB05575	373.451	373.19	6	C22H23N5O	Motesanib	investigational	investigational
4159	dbank_004159	-8.6	151174	DB06558	605.625	605.181	12	C27H27N9O6S	Tezosentan	investigational	investigational
4204	dbank_004204	-8.6	104974	DB06660	552.54	551.211	3	C31H35Cl2N3O2	Saredutant	investigational	investigational
4209	dbank_004209	-8.6	6433095	DB06677	577.58	577.149	12	C25H23N9O6S	Clazosentan	investigational	investigational
4358	dbank_004358	-8.6	24941248	DB06897	407.893	407.14	4	C23H22ClN3O2	3-[3-chloro-5-(5-{[(1S)-1-phenylethyl]amino}isoxazolo[5,4-c]pyridin-3-yl)phenyl]propan-1-ol	experimental	experimental
4376	dbank_004376	-8.6	16115747	DB06916	420.464	420.191	7	C22H24N6O3	N-[2-(1,3-BENZODIOXOL-5-YL)ETHYL]-1-[2-(1H-IMIDAZOL-1-YL)-6-METHYLPYRIMIDIN-4-YL]-D-PROLINAMIDE	experimental	experimental
4385	dbank_004385	-8.6	15991573	DB06925	422.402	422.135	4	C23H17F3N4O	3-(2-AMINOQUINAZOLIN-6-YL)-4-METHYL-N-[3-(TRIFLUOROMETHYL)PHENYL]BENZAMIDE	experimental	experimental
4570	dbank_004570	-8.6	44144378	DB07141	372.463	372.195	5	C23H24N4O	5-[(3R)-3-(5-methoxy-4'-methylbiphenyl-3-yl)but-1-yn-1-yl]-6-methylpyrimidine-2,4-diamine	experimental	experimental
4799	dbank_004799	-8.6	25174099	DB07397	467.498	467.126	6	C22H21N5O5S	(5S)-5-(2-amino-2-oxoethyl)-4-oxo-N-[(3-oxo-3,4-dihydro-2H-1,4-benzoxazin-6-yl)methyl]-3,4,5,6,7,8-hexahydro[1]benzothieno[2,3-d]pyrimidine-2-carboxamide	experimental	experimental
4811	dbank_004811	-8.6	16122553	DB07410	448.3	448.048	7	C20H18O8P2	[2-(3-DIBENZOFURAN-4-YL-PHENYL)-1-HYDROXY-1-PHOSPHONO-ETHYL]-PHOSPHONIC ACID	experimental	experimental
5133	dbank_005133	-8.6	24875313	DB07789	494.454	494.121	8	C18H17F3N10O2S	1-[5-Methyl-2-(trifluoromethyl)furan-3-yl]-3-[5-[2-[[6-(1H-1,2,4-triazol-5-ylamino)pyrimidin-4-yl]amino]ethyl]-1,3-thiazol-2-yl]urea	experimental	experimental
5160	dbank_005160	-8.6	12087505	DB07817	444.531	444.104	6	C19H20N6O3S2	1-{3-[(4-pyridin-2-ylpiperazin-1-yl)sulfonyl]phenyl}-3-(1,3-thiazol-2-yl)urea	experimental	experimental
5328	dbank_005328	-8.6	24882195	DB08006	325.367	325.133	4	C20H15N5	N-anthracen-2-yl-5-methyl[1,2,4]triazolo[1,5-a]pyrimidin-7-amine	experimental	experimental
5448	dbank_005448	-8.6	24864078	DB08137	324.309	324.102	3	C17H13FN4O2	(4E)-N-(4-fluorophenyl)-4-[(phenylcarbonyl)imino]-4H-pyrazole-3-carboxamide	experimental	experimental
5508	dbank_005508	-8.6	448781	DB08204	413.379	413.09	5	C24H15NO6	3-DIPHENOL-6-NITRO-3H-BENZO[DE]ISOCHROMEN-1-ONE	experimental	experimental
5630	dbank_005630	-8.6	10389239	DB08358	340.378	340.132	3	C21H16N4O	2-(2-QUINOLIN-3-YLPYRIDIN-4-YL)-1,5,6,7-TETRAHYDRO-4H-PYRROLO[3,2-C]PYRIDIN-4-ONE	experimental	experimental
5798	dbank_005798	-8.6	11653652	DB08553	373.451	373.19	5	C22H23N5O	(1E)-5-(1-piperidin-4-yl-3-pyridin-4-yl-1H-pyrazol-4-yl)-2,3-dihydro-1H-inden-1-one oxime	experimental	experimental
6027	dbank_006027	-8.6	9871419	DB08816	522.568	522.186	9	C23H28F2N6O4S	Ticagrelor	approved	approved
6087	dbank_006087	-8.6	10184653	DB08916	485.938	485.163	7	C24H25ClFN5O3	Afatinib	approved	approved
6200	dbank_006200	-8.6	23725625	DB09074	434.463	434.175	5	C24H23FN4O3	Olaparib	approved	approved
6204	dbank_006204	-8.6	9809715	DB09079	539.625	539.253	6	C31H33N5O4	Nintedanib	approved	approved
6444	dbank_006444	-8.6	114948	DB11274	577.726	577.326	6	C32H43N5O5	Dihydro-alpha-ergocryptine	approved	approved
6603	dbank_006603	-8.6	9865375	DB11650	393.527	393.23	3	C25H31NO3	HT-0712	investigational	investigational
6641	dbank_006641	-8.6	71226662	DB11703	465.517	465.191	6	C26H23N7O2	Acalabrutinib	approved; investigational	approved	investigational
6649	dbank_006649	-8.6	50922675	DB11718	540.01	539.152	7	C22H27ClFN7O4S	Encorafenib	approved; investigational	approved	investigational
6679	dbank_006679	-8.6	46181428	DB11765	396.364	396.141	5	C18H19F3N4O3	PF-04991532	investigational	investigational
6742	dbank_006742	-8.6	23649154	DB11852	517.411	517.114	4	C25H14F7N5	Tegobuvir	investigational	investigational
6803	dbank_006803	-8.6	487101	DB11943	440.76	440.05	8	C18H12ClF3N4O4	Delafloxacin	approved; investigational	approved	investigational
6820	dbank_006820	-8.6	393111	DB11965	556.619	556.232	8	C31H32N4O6	SJG-136	investigational	investigational
6911	dbank_006911	-8.6	67335295	DB12101	449.507	449.195	6	C25H27N3O5	CC-220	investigational	investigational
6939	dbank_006939	-8.6	11714580	DB12138	700.273	699.185	6	C35H34ClN7O3S2	PF-03715455	investigational	investigational
6950	dbank_006950	-8.6	53380437	DB12154	553.526	553.196	7	C26H23F4N9O	Itacitinib	investigational	investigational
7141	dbank_007141	-8.6	16721125	DB12419	514.46	514.116	4	C21H21F7N2O3S	HSD-016	investigational	investigational
7303	dbank_007303	-8.6	44467821	DB12669	642.78	642.274	10	C33H38N8O4S	4SC-203	investigational	investigational
7543	dbank_007543	-8.6	72098	DB13042	459.56	459.162	5	C26H25N3O3S	Fenoverine	investigational	investigational
7556	dbank_007556	-8.6	11712649	DB13061	476.862	476.085	6	C25H15ClF2N4O2	MLN8054	investigational	investigational
8249	dbank_008249	-8.6	5892	DB14128	663.425	663.109	16	C21H27N7O14P2	Nadide	experimental	experimental
8395	dbank_008395	-8.6	73110	DB14729	570.38	569.076	7	C27H21Cl2N3O7	Rebeccamycin	experimental	experimental
8411	dbank_008411	-8.6	44623998	DB14766	457.493	457.186	3	C26H26F3NO3	Etrasimod	investigational	investigational
8489	dbank_008489	-8.6	70798655	DB14935	363.377	363.133	5	C19H17N5O3	Serabelisib	investigational	investigational
8527	dbank_008527	-8.6	51030730	DB15047	468.54	468.137	7	C25H20N6O2S	BMS-919373	investigational	investigational
8585	dbank_008585	-8.6	67409219	DB15157	469.84	469.09	6	C22H19ClF3NO5	Voruciclib	investigational	investigational
8595	dbank_008595	-8.6	57384863	DB15186	382.428	382.187	9	C18H22N8O2	GDC-0084	investigational	investigational
8624	dbank_008624	-8.6	118023034	DB15233	498.57	498.24	8	C26H27FN10	Avapritinib	investigational	investigational
8672	dbank_008672	-8.6	72734520	DB15327	487.539	487.213	6	C26H26FN7O2	Abivertinib	investigational	investigational
8721	dbank_008721	-8.6	118196485	DB15435	495.627	495.263	5	C30H33N5O2	BMS-986158	investigational	investigational
8725	dbank_008725	-8.6	68029831	DB15442	446.559	446.254	7	C24H30N8O	Trilaciclib	investigational	investigational
8738	dbank_008738	-8.6	76314940	DB15465	403.478	403.178	4	C25H25NO4	Benzhydrocodone	approved	approved
42	dbank_000042	-8.5	439153	DB00157	665.441	665.125	16	C21H29N7O14P2	NADH	approved; nutraceutical	approved	nutraceutical
492	dbank_000492	-8.5	16850	DB00693	332.306	332.068	3	C20H12O5	Fluorescein	approved	approved
604	dbank_000604	-8.5	5284447	DB00826	665.733	665.305	13	C33H47NO13	Natamycin	approved	approved
759	dbank_000759	-8.5	2882	DB01003	468.366	468.069	11	C23H16O11	Cromoglicic acid	approved	approved
877	dbank_000877	-8.5	5342	DB01138	404.482	404.119	3	C23H20N2O3S	Sulfinpyrazone	approved	approved
918	dbank_000918	-8.5	3151	DB01184	425.911	425.162	3	C22H24ClN5O2	Domperidone	approved; investigational; vet_approved	approved	investigational	vet_approved
1040	dbank_001040	-8.5	68873	DB01395	366.493	366.219	2	C24H30O3	Drospirenone	approved	approved
1275	dbank_001275	-8.5	5287544	DB01678	607.591	607.208	7	C31H34N3O8P	RU84687	experimental	experimental
1325	dbank_001325	-8.5	446605	DB01745	522.616	522.194	6	C27H30N4O5S	N-Alpha-(2-Naphthylsulfonyl)-N(3-Amidino-L-Phenylalaninyl)Isopipecolinic Acid Methyl Ester	experimental	experimental
1394	dbank_001394	-8.5	445561	DB01830	665.608	665.227	10	C30H41N3O10P2	AP-22408	experimental	experimental
1445	dbank_001445	-8.5	6105620	DB01897	466.495	466.109	5	C24H16N7O2S	2-(2f-Benzothiazolyl)-5-Styryl-3-(4f-Phthalhydrazidyl)Tetrazolium Chloride	experimental	experimental
1496	dbank_001496	-8.5	11987780	DB01967	403.538	403.193	4	C21H29N3O3S	N-{3-[(7ar,12as,12bs)-7-Oxo-1,3,4,6,7,7a,12a,12b-Octahydroindolo[2,3-a]Quinolizin-12(2h)-Yl]Propyl}Propane-2-Sulfonamide	experimental	experimental
1863	dbank_001863	-8.5	447522	DB02432	661.673	661.244	8	C35H36FN3O9	RU90395	experimental	experimental
2080	dbank_002080	-8.5	449129	DB02704	648.787	648.32	6	C40H44N2O6	(2R,3R,4R,5R)-3,4-Dihydroxy-N,N'-bis[(1S,2R)-2-hydroxy-2,3-dihydro-1H-inden-1-yl]-2,5-bis(2-phenylethyl)hexanediamide	experimental	experimental
2369	dbank_002369	-8.5	448605	DB03082	411.459	411.181	7	C23H21N7O	6-[(Z)-Amino(Imino)Methyl]-N-[4-(Aminomethyl)Phenyl]-4-(Pyrimidin-2-Ylamino)-2-Naphthamide	experimental	experimental
2403	dbank_002403	-8.5	5288821	DB03126	544.349	544.087	12	C18H22N6O10P2	Mant-Adp	experimental	experimental
2866	dbank_002866	-8.5	445459	DB03744	425.865	425.114	4	C22H20ClN3O4	Cp403700, (S)-1-{2-[(5-Chloro-1h-Indole-2-Carbonyl)-Amino]-3-Phenyl-Propionyl}-Azetidine-3-Carboxylate	experimental	experimental
3007	dbank_003007	-8.5	656967	DB03916	423.942	423.194	7	C22H26ClN7	4-{2-[4-(2-Aminoethyl)Piperazin-1-Yl]Pyridin-4-Yl}-N-(3-Chloro-4-Methylphenyl)Pyrimidin-2-Amine	experimental	experimental
3125	dbank_003125	-8.5	5289104	DB04071	663.425	663.109	16	C21H27N7O14P2	Cpad	experimental	experimental
3297	dbank_003297	-8.5	447767	DB04289	393.48	393.184	2	C26H23N3O	Genz-10850	experimental	experimental
3761	dbank_003761	-8.5	208951	DB04888	385.458	385.179	4	C24H23N3O2	Bifeprunox	investigational	investigational
3822	dbank_003822	-8.5	6440764	DB05116	574.321	573.051	6	C21H25BrN3O9P	Thymectacin	investigational	investigational
4083	dbank_004083	-8.5	16066663	DB06350	523.94	523.019	6	C20H15ClFN5O5S2	Elinogrel	investigational	investigational
4104	dbank_004104	-8.5	115212	DB06420	640.379	640.044	11	C26H25IO11	Annamycin	investigational	investigational
4109	dbank_004109	-8.5	10343641	DB06435	448.526	448.19	3	C28H24N4O2	Tarazepide	investigational	investigational
4187	dbank_004187	-8.5	11226090	DB06624	515.96	515.159	4	C27H25ClF3N3O2	Taranabant	investigational	investigational
4357	dbank_004357	-8.5	21081761	DB06896	458.416	458.119	3	C25H16F2N4O3	1-(4-fluorophenyl)-N-[3-fluoro-4-(1H-pyrrolo[2,3-b]pyridin-4-yloxy)phenyl]-2-oxo-1,2-dihydropyridine-3-carboxamide	experimental	experimental
4442	dbank_004442	-8.5	11560856	DB06997	422.384	422.119	3	C22H16F2N4O3	2-(4-fluorophenyl)-N-{[3-fluoro-4-(1H-pyrrolo[2,3-b]pyridin-4-yloxy)phenyl]carbamoyl}acetamide	experimental	experimental
4571	dbank_004571	-8.5	44144379	DB07142	386.489	386.211	5	C24H26N4O	5-[(3R)-3-(5-methoxy-3',5'-dimethylbiphenyl-3-yl)but-1-yn-1-yl]-6-methylpyrimidine-2,4-diamine	experimental	experimental
4678	dbank_004678	-8.5	445480	DB07261	453.537	453.093	6	C21H19N5O3S2	THIENO[3,2-B]PYRIDINE-2-SULFONIC ACID [1-(1-AMINO-ISOQUINOLIN-7-YLMETHYL)-2-OXO-PYRROLDIN-3-YL]-AMIDE	experimental	experimental
4859	dbank_004859	-8.5	24178119	DB07468	292.332	292.121	4	C18H16N2O2	(3aS)-3a-hydroxy-5-methyl-1-phenyl-1,2,3,3a-tetrahydro-4H-pyrrolo[2,3-b]quinolin-4-one	experimental	experimental
4927	dbank_004927	-8.5	9549303	DB07545	413.396	413.146	5	C21H18F3N5O	N-{3-[(4-{[3-(TRIFLUOROMETHYL)PHENYL]AMINO}PYRIMIDIN-2-YL)AMINO]PHENYL}CYCLOPROPANECARBOXAMIDE	experimental	experimental
4932	dbank_004932	-8.5	656913	DB07550	467.829	467.097	5	C20H17ClF3N5O3	2-(6-CHLORO-3-{[2,2-DIFLUORO-2-(1-OXIDO-2-PYRIDINYL)ETHYL]AMINO}-2-OXO-1(2H)-PYRAZINYL)-N-[(2-FLUOROPHENYL)METHYL]ACETAMIDE	experimental	experimental
5332	dbank_005332	-8.5	45268539	DB08010	430.428	430.133	5	C25H19FN2O4	(3Z)-1-[(6-fluoro-4H-1,3-benzodioxin-8-yl)methyl]-4-[(E)-2-phenylethenyl]-1H-indole-2,3-dione 3-oxime	experimental	experimental
5663	dbank_005663	-8.5	4369443	DB08395	423.394	423.123	6	C22H18FN3O5	2-(ETHOXYMETHYL)-4-(4-FLUOROPHENYL)-3-[2-(2-HYDROXYPHENOXY)PYRIMIDIN-4-YL]ISOXAZOL-5(2H)-ONE	experimental	experimental
5746	dbank_005746	-8.5	447362	DB08495	462.973	462.059	5	C20H19ClN4O3S2	4-({4-[(6-CHLORO-1-BENZOTHIEN-2-YL)SULFONYL]-2-OXOPIPERAZIN-1-YL}METHYL)BENZENECARBOXIMIDAMIDE	experimental	experimental
5957	dbank_005957	-8.5	25155578	DB08738	444.526	444.216	4	C26H28N4O3	1-{3-oxo-3-[(2S)-2-(pyrrolidin-1-ylcarbonyl)pyrrolidin-1-yl]propyl}-3-phenylquinoxalin-2(1H)-one	experimental	experimental
6186	dbank_006186	-8.5	24821094	DB09053	440.507	440.196	5	C25H24N6O2	Ibrutinib	approved	approved
6352	dbank_006352	-8.5	93184	DB09319	494.56	494.151	5	C26H26N2O6S	Carindacillin	approved; investigational	approved	investigational
6445	dbank_006445	-8.5	65667	DB11275	577.726	577.326	6	C32H43N5O5	Epicriptine	approved	approved
6547	dbank_006547	-8.5	56206	DB11511	399.398	399.139	6	C21H19F2N3O3	Difloxacin	vet_approved	vet_approved
6625	dbank_006625	-8.5	91617630	DB11682	393.44	393.19	6	C19H27N3O6	Daprodustat	investigational	investigational
6671	dbank_006671	-8.5	54713659	DB11751	405.358	405.114	6	C19H17F2N3O5	Cabotegravir	investigational	investigational
6687	dbank_006687	-8.5	25227462	DB11775	490.63	490.226	6	C25H30N8OS	PF-03758309	investigational	investigational
6741	dbank_006741	-8.5	11387605	DB11851	576.615	576.257	8	C30H31F3N8O	Bafetinib	investigational	investigational
6759	dbank_006759	-8.5	54708673	DB11878	503.636	503.29	6	C29H37N5O3	Filibuvir	investigational	investigational
6769	dbank_006769	-8.5	9832447	DB11894	502.59	502.167	5	C27H26N4O4S	Efatutazone	investigational	investigational
6770	dbank_006770	-8.5	44516953	DB11896	615.739	615.328	10	C32H41N9O4	Gedatolisib	investigational	investigational
6812	dbank_006812	-8.5	135564558	DB11953	395.458	395.207	7	C20H25N7O2	PF-04447943	investigational	investigational
6821	dbank_006821	-8.5	46700744	DB11966	658.649	658.252	10	C30H39N6O9P	BMS-986094	investigational	investigational
6879	dbank_006879	-8.5	56842109	DB12055	422.36	422.109	4	C20H17F3N2O5	MK-0767	investigational	investigational
6901	dbank_006901	-8.5	24737642	DB12085	500.63	500.226	5	C26H33FN4O3S	LCL-161	investigational	investigational
6914	dbank_006914	-8.5	51001932	DB12108	460.542	460.234	6	C24H28N8O2	Taselisib	investigational	investigational
6969	dbank_006969	-8.5	151115	DB12185	435.455	435.159	5	C24H22FN3O4	Exatecan	investigational	investigational
6970	dbank_006970	-8.5	25108829	DB12186	516.64	516.14	6	C26H24N6O2S2	SRT-2104	investigational	investigational
6998	dbank_006998	-8.5	11319053	DB12228	566.523	566.206	4	C26H27F5N6O3	Telcagepant	investigational	investigational
7050	dbank_007050	-8.5	11627443	DB12295	499.528	499.218	9	C23H29N7O6	Evodenoson	investigational	investigational
7051	dbank_007051	-8.5	53340771	DB12297	595.72	595.258	11	C29H37N7O5S	GLPG-0187	investigational	investigational
7059	dbank_007059	-8.5	44469321	DB12306	390.24	389.05	2	C19H14Cl2FN3O	Cipargamin	investigational	investigational
7104	dbank_007104	-8.5	11387409	DB12375	516.3	514.992	5	C20H13Cl2F2N3O5S	Oglemilast	investigational	investigational
7109	dbank_007109	-8.5	46940575	DB12380	498.65	498.241	6	C25H34N6O3S	GDC-0152	investigational	investigational
7111	dbank_007111	-8.5	10309899	DB12382	413.45	413.116	7	C19H19N5O4S	R-306465	investigational	investigational
7204	dbank_007204	-8.5	71811910	DB12513	554.723	554.332	4	C33H44F2N2O3	Omaveloxolone	investigational	investigational
7352	dbank_007352	-8.5	11282283	DB12742	447.51	447.137	5	C23H21N5O3S	Amuvatinib	investigational	investigational
7379	dbank_007379	-8.5	46866319	DB12784	389.438	389.176	6	C21H20FN7	NS-018	investigational	investigational
7440	dbank_007440	-8.5	3035850	DB12885	544.73	544.012	8	C18H18ClIN6O4	CF-102	investigational	investigational
7495	dbank_007495	-8.5	6918508	DB12966	387.85	387.137	7	C18H19ClFN7	Falnidamol	investigational	investigational
7555	dbank_007555	-8.5	71721648	DB13060	580.13	579.272	9	C30H38ClN7O3	CEP-37440	investigational	investigational
7577	dbank_007577	-8.5	24767976	DB13093	445.483	445.186	5	C23H23N7O3	TAK-593	investigational	investigational
7579	dbank_007579	-8.5	57519700	DB13095	704.639	704.111	8	C28H23F7N6O4S2	JTK-853	investigational	investigational
7602	dbank_007602	-8.5	73388393	DB13126	574.5	574.181	4	C26H25F7N4O3	BMS-986115	investigational	investigational
7637	dbank_007637	-8.5	5345	DB13215	794.03	789.645	9	C20H10Br4O10S2	Sulfobromophthalein	experimental	experimental
7956	dbank_007956	-8.5	3033860	DB13643	464.904	464.136	7	C23H21ClN6O3	Loprazolam	experimental	experimental
8048	dbank_008048	-8.5	9852585	DB13764	654.574	654.18	17	C29H34O17	Monoxerutin	experimental	experimental
8081	dbank_008081	-8.5	3932	DB13806	391.474	391.168	3	C26H21N3O	Linopirdine	experimental	experimental
8316	dbank_008316	-8.5	11234049	DB14569	370.344	370.119	7	C17H15FN6O3	Tedizolid	approved; investigational	approved	investigational
8334	dbank_008334	-8.5	93055	DB14632	458.587	458.267	5	C27H38O6	Prednisolone tebutate	approved; vet_approved	approved	vet_approved
8445	dbank_008445	-8.5	44511587	DB14854	357.405	357.165	3	C20H21F2N3O	TC-6987	investigational	investigational
8450	dbank_008450	-8.5	56960363	DB14860	561.44	560.151	7	C26H27Cl2FN6O3	Ensartinib	investigational	investigational
8459	dbank_008459	-8.5	58212050	DB14878	366.468	366.184	4	C24H22N4	Liafensine	investigational	investigational
8474	dbank_008474	-8.5	44603336	DB14903	506.431	506.148	8	C21H24FN6O6P	Rovafovir etalafenamide	investigational	investigational
8476	dbank_008476	-8.5	118596336	DB14906	545.457	545.157	7	C22H29FN3O10P	Adafosbuvir	investigational	investigational
8502	dbank_008502	-8.5	72950888	DB14989	571.56	571.183	7	C31H24F3N5O3	Umbralisib	investigational	investigational
8504	dbank_008504	-8.5	91844684	DB14995	399.373	399.119	2	C21H16F3N3O2	NP-G2-044	investigational	investigational
8517	dbank_008517	-8.5	52913813	DB15029	457.478	457.181	6	C24H25F2N3O4	AZD-8186	investigational	investigational
8554	dbank_008554	-8.5	9907331	DB15099	368.82	368.093	4	C20H17ClN2O3	GW-468816	investigational	investigational
8681	dbank_008681	-8.5	119057475	DB15345	451.502	451.202	7	C24H26FN5O3	GSK-945237	investigational	investigational
8723	dbank_008723	-8.5	70674853	DB15437	601.606	601.243	2	C31H34F7NO3	Rocacetrapib	investigational	investigational
8726	dbank_008726	-8.5	134587348	DB15444	597.66	597.235	8	C26H34F3N7O4S	Elexacaftor	approved; investigational	approved	investigational
286	dbank_000286	-8.4	452548	DB00444	656.654	656.156	12	C32H32O13S	Teniposide	approved	approved
375	dbank_000375	-8.4	54676228	DB00554	331.346	331.063	5	C15H13N3O4S	Piroxicam	approved; investigational	approved	investigational
559	dbank_000559	-8.4	36462	DB00773	588.557	588.184	12	C29H32O13	Etoposide	approved	approved
985	dbank_000985	-8.4	115237	DB01267	426.484	426.207	5	C23H27FN4O3	Paliperidone	approved	approved
1315	dbank_001315	-8.4	444290	DB01732	538.634	538.247	5	C33H34N2O5	(4r,5s,6s,7r)-1,3-Dibenzyl-4,7-Bis(Phenoxymethyl)-5,6-Dihydroxy-1,3 Diazepan-2-One	experimental	experimental
1332	dbank_001332	-8.4	49867432	DB01753	760.412	760.078	18	C21H29N7O18P3	4-Oxo-nicotinamide-adenine dinucleotide phosphate	experimental	experimental
1477	dbank_001477	-8.4	2403	DB01946	398.457	398.174	3	C24H22N4O2	3-[1-(3-Aminopropyl)-1h-Indol-3-Yl]-4-(1-Methyl-1h-Indol-3-Yl)-1h-Pyrrole-2,5-Dione	experimental	experimental
1894	dbank_001894	-8.4	447735	DB02473	384.474	384.195	4	C24H24N4O	6-[N-(1-Isopropyl-3,4-Dihydro-7-Isoquinolinyl)Carbamyl]-2-Naphthalenecarboxamidine	experimental	experimental
1936	dbank_001936	-8.4	644358	DB02524	718.27	717.982	20	C16H17N8O19P3	2',3'-O-{4-[Hydroxy(oxido)-λ5-azanylidene]-2,6-dinitro-2,5-cyclohexadiene-1,1-diyl}adenosine 5'-(tetrahydrogen triphosphate)	experimental	experimental
1959	dbank_001959	-8.4	447731	DB02551	372.463	372.195	4	C23H24N4O	6-[N-(4-Ethyl-1,2,3,4-Tetrahydro-6-Isoquinolinyl)Carbamyl]-2-Naphthalenecarboxamidine	experimental	experimental
1962	dbank_001962	-8.4	656989	DB02555	685.644	684.271	8	C33H42Cl2N8O4	SP4160	experimental	experimental
2022	dbank_002022	-8.4	445306	DB02629	688.714	688.26	8	C38H38F2N2O8	N,N-[2,5-O-di-2-fluoro-benzyl-glucaryl]-di-[1-amino-indan-2-ol]	experimental	experimental
2590	dbank_002590	-8.4	123926	DB03363	662.437	662.114	15	C22H28N6O14P2	3-Acetylpyridine Adenine Dinucleotide	experimental	experimental
3020	dbank_003020	-8.4	449169	DB03932	603.788	603.356	5	C37H49NO6	LFA703	experimental	experimental
3101	dbank_003101	-8.4	5287447	DB04040	556.563	556.238	14	C24H36N4O11	N-(2-Morpholin-4-Yl-1-Morpholin-4-Ylmethyl-Ethyl)-3-Nitro-5-(3,4,5-Trihydroxy-6-Hydroxymethyl-Tetrahydro-Pyran-2-Yloxy)-Benzamide	experimental	experimental
3163	dbank_003163	-8.4	188347	DB04121	523.18	522.991	15	C10H16N5O14P3	Guanosine-3'-Monophosphate-5'-Diphosphate	experimental	experimental
3166	dbank_003166	-8.4	178051	DB04125	507.605	507.194	6	C26H29N5O4S	N-Alpha-(2-Naphthylsulfonyl)-N(3-Amidino-L-Phenylalaninyl)-4-Acetyl-Piperazine	experimental	experimental
3218	dbank_003218	-8.4	444461	DB04187	501.552	501.157	10	C24H27N3O7S	(9S,10S)-9-(S-glutathionyl)-10-hydroxy-9,10-dihydrophenanthrene	experimental	experimental
3305	dbank_003305	-8.4	54688711	DB04298	495.673	495.244	4	C29H37NO4S	3-(4-Amino-2-Tert-Butyl-5-Methyl-Phenylsulfanyl)-6-Cyclopentyl-4-Hydroxy-6-[2-(4-Hydroxy-Phenyl)-Ethyl]-5,6-Dihydro-Pyran-2-One	experimental	experimental
3374	dbank_003374	-8.4	17753965	DB04392	336.295	336.063	4	C19H12O6	Bishydroxy[2h-1-Benzopyran-2-One,1,2-Benzopyrone]	experimental	experimental
3386	dbank_003386	-8.4	447545	DB04408	659.636	659.2	11	C35H33NO12	Ncs-Chromophore	experimental	experimental
3655	dbank_003655	-8.4	5327014	DB04757	375.231	375.058	12	C11H14N5O8P	GUANOSINE-2',3'-O-METHYLIDENEPHOSPHONATE	experimental	experimental
4034	dbank_004034	-8.4	71351	DB06229	420.488	420.196	4	C24H25FN4O2	Ocaperidone	investigational	investigational
4099	dbank_004099	-8.4	5360621	DB06409	461.462	461.169	10	C23H27NO9	Morphine glucuronide	investigational	investigational
4142	dbank_004142	-8.4	11406590	DB06518	388.368	388.135	6	C19H18F2N4O3	R-1487	investigational	investigational
4214	dbank_004214	-8.4	6918314	DB06684	441.525	441.216	4	C26H27N5O2	Vilazodone	approved	approved
4304	dbank_004304	-8.4	6852165	DB06831	450.901	450.067	6	C21H15ClN6O2S	2-((9H-PURIN-6-YLTHIO)METHYL)-5-CHLORO-3-(2-METHOXYPHENYL)QUINAZOLIN-4(3H)-ONE	experimental	experimental
4345	dbank_004345	-8.4	25174101	DB06882	399.488	399.206	3	C24H25N5O	1-[1-(3-aminophenyl)-3-tert-butyl-1H-pyrazol-5-yl]-3-naphthalen-1-ylurea	experimental	experimental
4411	dbank_004411	-8.4	11840906	DB06959	394.468	394.179	5	C25H22N4O	(2S)-1-(3H-Indol-3-yl)-3-{[5-(6-isoquinolinyl)-3-pyridinyl]oxy}-2-propanamine	experimental	experimental
4445	dbank_004445	-8.4	24180720	DB07000	442.439	442.091	5	C21H16F2N4O3S	N-{2,4-difluoro-3-[(5-pyridin-3-yl-1H-pyrrolo[2,3-b]pyridin-3-yl)carbonyl]phenyl}ethanesulfonamide	experimental	experimental
4579	dbank_004579	-8.4	25138294	DB07152	362.36	362.129	5	C19H15FN6O	N-[4-(5-fluoro-6-methylpyridin-2-yl)-5-quinoxalin-6-yl-1H-imidazol-2-yl]acetamide	experimental	experimental
4614	dbank_004614	-8.4	25049750	DB07189	464.512	464.174	5	C29H24N2O4	(1S,3R,6S)-4-oxo-6-{4-[(2-phenylquinolin-4-yl)methoxy]phenyl}-5-azaspiro[2.4]heptane-1-carboxylic acid	experimental	experimental
4640	dbank_004640	-8.4	10138993	DB07220	453.557	453.183	5	C23H27N5O3S	N-[5-(1,1-DIOXIDOISOTHIAZOLIDIN-2-YL)-1H-INDAZOL-3-YL]-2-(4-PIPERIDIN-1-YLPHENYL)ACETAMIDE	experimental	experimental
4673	dbank_004673	-8.4	24861080	DB07256	383.788	383.079	7	C18H14ClN5O3	3-({4-[(5-CHLORO-1,3-BENZODIOXOL-4-YL)AMINO]PYRIMIDIN-2-YL}AMINO)BENZAMIDE	experimental	experimental
4711	dbank_004711	-8.4	17756743	DB07297	399.488	399.206	5	C24H25N5O	5,6-DIPHENYL-N-(2-PIPERAZIN-1-YLETHYL)FURO[2,3-D]PYRIMIDIN-4-AMINE	experimental	experimental
4736	dbank_004736	-8.4	24832022	DB07324	321.333	321.123	5	C17H15N5O2	3-({2-[(2-AMINO-6-METHYLPYRIMIDIN-4-YL)ETHYNYL]BENZYL}AMINO)-1,3-OXAZOL-2(3H)-ONE	experimental	experimental
4786	dbank_004786	-8.4	42627755	DB07382	332.363	332.15	6	C17H16N8	N~2~-1H-benzimidazol-5-yl-N~4~-(3-cyclopropyl-1H-pyrazol-5-yl)pyrimidine-2,4-diamine	experimental	experimental
4807	dbank_004807	-8.4	16741237	DB07406	440.519	440.163	5	C21H24N6O3S	(4R)-N-[4-({[2-(DIMETHYLAMINO)ETHYL]AMINO}CARBONYL)-1,3-THIAZOL-2-YL]-4-METHYL-1-OXO-2,3,4,9-TETRAHYDRO-1H-BETA-CARBOLINE-6-CARBOXAMIDE	experimental	experimental
4862	dbank_004862	-8.4	11957417	DB07471	457.93	457.086	5	C22H20ClN3O4S	5-[5,6-BIS(METHYLOXY)-1H-BENZIMIDAZOL-1-YL]-3-{[1-(2-CHLOROPHENYL)ETHYL]OXY}-2-THIOPHENECARBOXAMIDE	experimental	experimental
4942	dbank_004942	-8.4	46937081	DB07563	418.578	418.284	5	C25H34N6	1-{7-cyclohexyl-6-[4-(4-methylpiperazin-1-yl)benzyl]-7H-pyrrolo[2,3-d]pyrimidin-2-yl}methanamine	experimental	experimental
4987	dbank_004987	-8.4	5288017	DB07618	421.535	421.248	5	C24H31N5O2	2-(4-(AMINOMETHYL)PIPERIDIN-1-YL)-N-(3_CYCLOHEXYL-4-OXO-2,4-DIHYDROINDENO[1,2-C]PYRAZOL-5-YL)ACETAMIDE	experimental	experimental
4990	dbank_004990	-8.4	5288018	DB07622	437.518	437.163	6	C21H23N7O2S	1-(3-(2,4-DIMETHYLTHIAZOL-5-YL)-4-OXO-2,4-DIHYDROINDENO[1,2-C]PYRAZOL-5-YL)-3-(4-METHYLPIPERAZIN-1-YL)UREA	experimental	experimental
5047	dbank_005047	-8.4	25243853	DB07689	436.467	436.197	9	C21H24N8O3	METHYL 1-(4-{[(2,4-DIAMINOPTERIDIN-6-YL)METHYL]AMINO}BENZOYL)PIPERIDINE-4-CARBOXYLATE	experimental	experimental
5080	dbank_005080	-8.4	11992146	DB07728	307.322	307.112	2	C18H14FN3O	2-[2-(2-FLUOROPHENYL)PYRIDIN-4-YL]-1,5,6,7-TETRAHYDRO-4H-PYRROLO[3,2-C]PYRIDIN-4-ONE	experimental	experimental
5188	dbank_005188	-8.4	9549257	DB07848	454.928	454.108	5	C19H23ClN4O5S	5-Chloro-N-{(3S)-1-[(2S)-1-(4-morpholinyl)-1-oxo-2-propanyl]-2-oxo-3-pyrrolidinyl}-1H-indole-2-sulfonamide	experimental	experimental
5337	dbank_005337	-8.4	45270264	DB08015	404.39	404.117	5	C23H17FN2O4	(3Z)-1-[(6-fluoro-4H-1,3-benzodioxin-8-yl)methyl]-4-phenyl-1H-indole-2,3-dione 3-oxime	experimental	experimental
5518	dbank_005518	-8.4	9845059	DB08220	420.541	420.23	4	C27H32O4	(8alpha,10alpha,13alpha,17beta)-17-[(4-hydroxyphenyl)carbonyl]androsta-3,5-diene-3-carboxylic acid	experimental	experimental
5532	dbank_005532	-8.4	46937134	DB08237	487.402	487.126	9	C21H22N5O7P	2'-deoxy-N-(naphthalen-1-ylmethyl)guanosine 5'-(dihydrogen phosphate)	experimental	experimental
5615	dbank_005615	-8.4	24779674	DB08340	302.333	302.128	5	C17H14N6	N,N'-DIPHENYLPYRAZOLO[1,5-A][1,3,5]TRIAZINE-2,4-DIAMINE	experimental	experimental
5704	dbank_005704	-8.4	24180585	DB08445	401.385	401.146	6	C20H18F3N5O	(3R,4S)-1-[6-(6-METHOXYPYRIDIN-3-YL)PYRIMIDIN-4-YL]-4-(2,4,5-TRIFLUOROPHENYL)PYRROLIDIN-3-AMINE	experimental	experimental
5763	dbank_005763	-8.4	16750097	DB08512	356.381	356.139	5	C20H16N6O	6-amino-2-[(1-naphthylmethyl)amino]-3,7-dihydro-8H-imidazo[4,5-g]quinazolin-8-one	experimental	experimental
5919	dbank_005919	-8.4	25113120	DB08698	373.471	373.125	4	C22H19N3OS	1-[(3S)-5-PHENYL-3-THIOPHEN-2-YL-3H-1,4-BENZODIAZEPIN-2-YL]AZETIDIN-3-OL	experimental	experimental
6033	dbank_006033	-8.4	9853053	DB08827	693.72	693.279	3	C39H37F6N3O2	Lomitapide	approved; investigational	approved	investigational
6066	dbank_006066	-8.4	42611257	DB08881	489.922	489.073	4	C23H18ClF2N3O3S	Vemurafenib	approved	approved
6156	dbank_006156	-8.4	2793	DB09003	481.073	480.266	5	C28H37ClN4O	Clocapramine	experimental	experimental
6586	dbank_006586	-8.4	11296583	DB11616	627.643	627.232	13	C32H37NO12	Pirarubicin	investigational	investigational
6612	dbank_006612	-8.4	11349170	DB11665	368.441	368.196	7	C19H24N6O2	BMS-690514	investigational	investigational
6682	dbank_006682	-8.4	49836093	DB11769	429.351	429.082	4	C22H14F3NO5	Funapide	investigational	investigational
6779	dbank_006779	-8.4	57335384	DB11907	555.562	555.221	8	C27H28F3N7O3	Rociletinib	investigational	investigational
6936	dbank_006936	-8.4	25101874	DB12134	448.527	448.222	7	C24H28N6O3	Gepotidacin	investigational	investigational
6986	dbank_006986	-8.4	12004316	DB12211	367.83	367.098	4	C21H18ClNO3	PSI-697	investigational	investigational
7038	dbank_007038	-8.4	24825740	DB12280	487.455	487.152	4	C25H21F4N3O3	AZD-5423	investigational	investigational
7135	dbank_007135	-8.4	11953153	DB12412	489.37	489.141	5	C18H19F8N5O2	Gemigliptin	investigational	investigational
7222	dbank_007222	-8.4	10252640	DB12542	439.54	439.179	7	C21H25N7O2S	GSK-356278	investigational	investigational
7235	dbank_007235	-8.4	49843471	DB12562	402.425	402.138	3	C24H19FN2O3	Setipiprant	investigational	investigational
7410	dbank_007410	-8.4	11677589	DB12836	491.61	491.199	5	C26H29N5O3S	Grapiprant	investigational; vet_approved	investigational	vet_approved
7565	dbank_007565	-8.4	59239165	DB13072	452.559	452.254	7	C24H32N6O3	GDC-0349	investigational	investigational
7819	dbank_007819	-8.4	5362460	DB13454	495.535	495.179	6	C29H25N3O5	Nicomorphine	experimental	experimental
8069	dbank_008069	-8.4	33630	DB13791	523.97	523.17	2	C28H27ClF5NO	Penfluridol	experimental	experimental
8088	dbank_008088	-8.4	71961	DB13816	493.54	493.163	8	C21H27N5O7S	Aspoxicillin	experimental	experimental
8181	dbank_008181	-8.4	71219	DB13991	316.448	316.194	2	C22H24N2	Pipequaline	experimental	experimental
8371	dbank_008371	-8.4	86793	DB14671	342.78	342.077	3	C18H15ClN2O3	Temazepam acetate	experimental	experimental
8376	dbank_008376	-8.4	24873449	DB14676	494.558	494.218	3	C29H29F3N2O2	Fagrocorat	experimental	experimental
8508	dbank_008508	-8.4	46916694	DB15009	432.432	432.155	6	C22H20N6O4	PF-04937319	investigational	investigational
8533	dbank_008533	-8.4	11169170	DB15057	580.482	580.153	7	C25H27F2N4O8P	NUC-1031	investigational	investigational
8631	dbank_008631	-8.4	5281793	DB15246	494.452	494.121	9	C26H22O10	Salvianolic acid A	investigational	investigational
8643	dbank_008643	-8.4	124173720	DB15275	407.378	407.141	6	C18H19F2N5O4	GDC-0077	investigational	investigational
8661	dbank_008661	-8.4	118513932	DB15305	401.474	401.196	6	C22H23N7O	Risdiplam	investigational	investigational
8709	dbank_008709	-8.4	24748573	DB15408	349.77	349.062	5	C19H12ClN3O2	Silmitasertib	investigational	investigational
8765	dbank_008765	-8.4	65651	DB15583	506.21	505.002	3	C20H10Cl2F5N3O3	Fluazuron	experimental	experimental
1	dbank_000001	-8.3	1051	DB00114	247.142	247.025	6	C8H10NO6P	Pyridoxal phosphate	approved; investigational; nutraceutical	approved	investigational	nutraceutical
97	dbank_000097	-8.3	64143	DB00220	567.782	567.313	5	C32H45N3O4S	Nelfinavir	approved	approved
308	dbank_000308	-8.3	5281040	DB00471	586.183	585.21	4	C35H36ClNO3S	Montelukast	approved	approved
481	dbank_000481	-8.3	34633	DB00680	427.517	427.157	5	C22H25N3O4S	Moricizine	approved; investigational; withdrawn	approved	investigational	withdrawn
733	dbank_000733	-8.3	150311	DB00973	409.425	409.149	3	C24H21F2NO3	Ezetimibe	approved	approved
868	dbank_000868	-8.3	2375	DB01128	430.373	430.061	5	C18H14F4N2O4S	Bicalutamide	approved	approved
886	dbank_000886	-8.3	3354	DB01148	391.46	391.178	4	C24H25NO4	Flavoxate	approved	approved
974	dbank_000974	-8.3	91610	DB01251	527.632	527.209	6	C27H33N3O6S	Gliquidone	approved; investigational	approved	investigational
979	dbank_000979	-8.3	208908	DB01259	581.058	580.135	7	C29H26ClFN4O4S	Lapatinib	approved; investigational	approved	investigational
1020	dbank_001020	-8.3	60919	DB01349	411.459	411.181	6	C23H21N7O	Tasosartan	experimental	experimental
1309	dbank_001309	-8.3	446636	DB01721	670.851	670.373	8	C39H50N4O6	N-[2-hydroxy-1-indanyl]-5-[(2-tertiarybutylaminocarbonyl)-4(benzo[1,3]dioxol-5-ylmethyl)-piperazino]-4-hydroxy-2-(1-phenylethyl)-pentanamide	experimental	experimental
1364	dbank_001364	-8.3	448008	DB01793	377.178	376.002	5	C17H10Cl2N2O4	SB-409513	experimental	experimental
1389	dbank_001389	-8.3	49866494	DB01824	629.742	629.31	8	C36H43N3O7	(3S)-Tetrahydro-3-furanyl {(2S,3S)-4-[(2S,4R)-4-{(1S,2R)-2-[(S)-amino(hydroxy)methoxy]-2,3-dihydro-1H-inden-1-yl}-2-benzyl-3-oxo-2-pyrrolidinyl]-3-hydroxy-1-phenyl-2-butanyl}carbamate	experimental	experimental
1431	dbank_001431	-8.3	2281	DB01876	346.346	346.129	7	C17H14N8O	Bis(5-Amidino-2-Benzimidazolyl)Methanone	experimental	experimental
1434	dbank_001434	-8.3	656973	DB01879	662.686	662.103	9	C32H26N2O10S2	(S)-2-{Methyl-[2-(Naphthalene-2-Sulfonylamino)-5-(Naphthalene-2-Sulfonyloxy)-Benzoyl]-Amino}-Succinicacid	experimental	experimental
1512	dbank_001512	-8.3	4369379	DB01988	457.569	457.227	5	C30H27N5	6((S)-3-Benzylpiperazin-1-Yl)-3-(Naphthalen-2-Yl)-4-(Pyridin-4-Yl)Pyrazine	experimental	experimental
1525	dbank_001525	-8.3	447371	DB02008	463.504	463.202	4	C25H26FN5O3	1-(2-Fluorobenzyl)-3-Butyl-8-(N-Acetyl-4-Aminobenzyl)-Xanthine	experimental	experimental
1708	dbank_001708	-8.3	5288011	DB02241	455.462	455.148	7	C26H21N3O5	8-Benzyl-2-Hydroperoxy-2-(4-Hydroxy-Benzyl)-6-(4-Hydroxy-Phenyl)-2h-Imidazo[1,2-a]Pyrazin-3-One	experimental	experimental
1800	dbank_001800	-8.3	446833	DB02360	376.342	376.086	4	C22H17O4P	Bis-Napthyl Beta-Ketophosphonic Acid	experimental	experimental
1925	dbank_001925	-8.3	447378	DB02510	443.435	443.122	12	C15H21N7O7S	'5'-O-(N-(L-Prolyl)-Sulfamoyl)Adenosine	experimental	experimental
1981	dbank_001981	-8.3	5288251	DB02581	662.564	661.218	9	C30H37Cl2N7O6	N(2)-carbamimidoyl-N-{2-[4-(3-{4-[(5-carboxyfuran-2-yl)methoxy]-2,3-dichlorophenyl}-1-methyl-1H-pyrazol-5-yl)piperidin-1-yl]-2-oxoethyl}-D-leucinamide	experimental	experimental
2081	dbank_002081	-8.3	447736	DB02705	386.489	386.211	4	C24H26N4O	6-[N-(1-Isopropyl-1,2,3,4-Tetrahydro-7-Isoquinolinyl)Carbamyl]-2-Naphthalenecarboxamidine	experimental	experimental
2103	dbank_002103	-8.3	448991	DB02733	432.904	432.168	8	C20H25ClN6O3	Purvalanol	experimental	experimental
2181	dbank_002181	-8.3	444825	DB02836	505.165	504.98	13	C10H14N5O13P3	Guanosine 5'-diphosphate 2':3'-cyclic monophosphate	experimental	experimental
2334	dbank_002334	-8.3	446552	DB03038	451.439	451.172	10	C20H21N9O4	LY341770	experimental	experimental
2387	dbank_002387	-8.3	5287555	DB03104	567.632	567.237	6	C33H33N3O6	2-[4-[(Z)-2-Acetamido-3-oxo-3-[[(3S)-2-oxo-1-[(4-phenylphenyl)methyl]azepan-3-yl]amino]prop-1-enyl]-2-formylphenyl]acetic acid	experimental	experimental
3046	dbank_003046	-8.3	54706138	DB03966	697.128	696.209	9	C35H37ClN2O11	Clorobiocin	experimental	experimental
3089	dbank_003089	-8.3	439450	DB04022	603.16	602.957	17	C10H17N5O17P4	Guanosine-5',3'-Tetraphosphate	experimental	experimental
3172	dbank_003172	-8.3	5287662	DB04131	511.563	511.221	9	C28H33NO8	10-(4-Dimethylamino-5-Hydroxy-6-Methyl-Tetrahydro-Pyran-2-Yloxy)-8-Ethyl-1,8,11-Trihydroxy-7,8,9,10-Tetrahydro-Naphthacene-5,12-Dione	experimental	experimental
3193	dbank_003193	-8.3	6323200	DB04158	764.324	764.027	21	C17H24N10O17P4	6-(Adenosine Tetraphosphate-Methyl)-7,8-Dihydropterin	experimental	experimental
3361	dbank_003361	-8.3	446912	DB04373	531.686	531.31	5	C32H41N3O4	4-Amino-N-{4-[2-(2,6-Dimethyl-Phenoxy)-Acetylamino]-3-Hydroxy-1-Isobutyl-5-Phenyl-Pentyl}-Benzamide	experimental	experimental
3437	dbank_003437	-8.3	5289484	DB04477	560.601	560.238	11	C29H32N6O6	N-1,2,3,4-Tetrahydronaphth-1-Yl-2'-[3,5-Dimethoxybenzamido]-2'-Deoxy-Adenosine	experimental	experimental
3590	dbank_003590	-8.3	5327131	DB04669	382.237	381.046	4	C17H14BrN6	TRIAZOLOPYRIMIDINE	experimental	experimental
3755	dbank_003755	-8.3	119373	DB04881	563.643	563.242	7	C34H33N3O5	Elacridar	investigational	investigational
3768	dbank_003768	-8.3	131664	DB04903	407.893	407.14	4	C23H22ClN3O2	Pagoclone	investigational	investigational
3837	dbank_003837	-8.3	16750192	DB05234	394.312	394.112	3	C17H16F6N2O2	LGD2941	investigational	investigational
3920	dbank_003920	-8.3	47576	DB05667	531.431	530.149	6	C26H28Cl2N4O4	Levoketoconazole	investigational	investigational
3923	dbank_003923	-8.3	53497429	DB05678	546.546	546.177	4	C31H25F3N2O4	SLx-4090	investigational	investigational
3927	dbank_003927	-8.3	9829419	DB05706	529.542	529.195	11	C27H31NO10	13-deoxydoxorubicin	investigational	investigational
4007	dbank_004007	-8.3	2929	DB06169	389.84	389.093	3	C22H16ClN3O2	Indibulin	investigational	investigational
4030	dbank_004030	-8.3	219024	DB06213	390.354	390.14	10	C15H18N8O5	Regadenoson	approved; investigational	approved	investigational
4041	dbank_004041	-8.3	148201	DB06240	646.744	646.279	8	C38H38N4O6	Tariquidar	investigational	investigational
4045	dbank_004045	-8.3	60096302	DB06248	538.644	538.247	5	C33H34N2O5	Amelubant	investigational	investigational
4088	dbank_004088	-8.3	6918602	DB06367	540.64	540.204	6	C27H32N4O6S	Relacatib	investigational	investigational
4116	dbank_004116	-8.3	148195	DB06448	638.822	636.05	3	C27H31Br2ClN4O2	Lonafarnib	investigational	investigational
4141	dbank_004141	-8.3	5702546	DB06515	628.718	628.267	8	C37H40O9	Resiniferatoxin	investigational	investigational
4340	dbank_004340	-8.3	6914568	DB06876	412.487	412.201	5	C24H24N6O	N-{5-[4-(4-METHYLPIPERAZIN-1-YL)PHENYL]-1H-PYRROLO[2,3-B]PYRIDIN-3-YL}NICOTINAMIDE	experimental	experimental
4397	dbank_004397	-8.3	11167118	DB06938	461.824	461.087	4	C21H15ClF3N5O2	4-[[2-[[4-chloro-3-(trifluoromethyl)phenyl]amino]-3H-benzimidazol-5-yl]oxy]-N-methyl-pyridine-2-carboxamide	experimental	experimental
4509	dbank_004509	-8.3	11538992	DB07072	419.367	419.154	4	C18H19F6N5	(1S,2R,5S)-5-[3-(TRIFLUOROMETHYL)-5,6-DIHYDRO[1,2,4]TRIAZOLO[4,3-A]PYRAZIN-7(8H)-YL]-2-(2,4,5-TRIFLUOROPHENYL)CYCLOHEXANAMINE	experimental	experimental
4512	dbank_004512	-8.3	447734	DB07076	373.448	373.179	4	C23H23N3O2	6-[(Z)-AMINO(IMINO)METHYL]-N-[3-(CYCLOPENTYLOXY)PHENYL]-2-NAPHTHAMIDE	experimental	experimental
4569	dbank_004569	-8.3	25093369	DB07140	358.436	358.179	5	C22H22N4O	5-[(3R)-3-(5-methoxybiphenyl-3-yl)but-1-yn-1-yl]-6-methylpyrimidine-2,4-diamine	experimental	experimental
4627	dbank_004627	-8.3	6914614	DB07204	395.456	395.175	5	C24H21N5O	(1S)-1-(1H-INDOL-3-YLMETHYL)-2-(2-PYRIDIN-4-YL-[1,7]NAPHTYRIDIN-5-YLOXY)-EHYLAMINE	experimental	experimental
4737	dbank_004737	-8.3	17755582	DB07325	389.429	389.116	7	C17H19N5O4S	N-[(2-AMINO-6-METHYLPYRIMIDIN-4-YL)METHYL]-3-{[(E)-(2-OXODIHYDROFURAN-3(2H)-YLIDENE)METHYL]AMINO}BENZENESULFONAMIDE	experimental	experimental
4797	dbank_004797	-8.3	16070039	DB07395	438.69	438.004	5	C16H8ClF5N2O5	4-[3-(2-Chloro-4,5-difluoro-benzoyl)ureido]-3-trifluoromethoxybenzoic acid	experimental	experimental
4805	dbank_004805	-8.3	16086422	DB07404	434.316	434.068	7	C20H20O7P2	(1-HYDROXY-1-PHOSPHONO-2-[1,1';3',1'']TERPHENYL-3-YL-ETHYL)-PHOSPHONIC ACID	experimental	experimental
4823	dbank_004823	-8.3	16122556	DB07426	450.315	450.063	8	C20H20O8P2	[1-HYDROXY-2-(1,1':3',1''-TERPHENYL-3-YLOXY)ETHANE-1,1-DIYL]BIS(PHOSPHONIC ACID)	experimental	experimental
4827	dbank_004827	-8.3	44631903	DB07430	374.459	374.12	4	C21H18N4OS	(10R)-10-methyl-3-(6-methylpyridin-3-yl)-9,10,11,12-tetrahydro-8H-[1,4]diazepino[5',6':4,5]thieno[3,2-f]quinolin-8-one	experimental	experimental
4930	dbank_004930	-8.3	447219	DB07548	432.399	432.152	6	C20H19F3N6O2	2-(6-CHLORO-3-{[2,2-DIFLUORO-2-(2-PYRIDINYL)ETHYL]AMINO}-2-OXO-1(2H)-PYRAZINYL)-N-[(2-FLUORO-6-PYRIDINYL)METHYL]ACETAMIDE	experimental	experimental
4931	dbank_004931	-8.3	6323250	DB07549	448.442	448.183	4	C21H23F3N6O2	2-(6-CHLORO-3-{[2,2-DIFLUORO-2-(2-PYRIDINYL)ETHYL]AMINO}-2-OXO-1(2H)-PYRAZINYL)-N-[(2-FLUORO-3-METHYL-6-PYRIDINYL)METHYL]ACETAMIDE	experimental	experimental
4961	dbank_004961	-8.3	5287979	DB07586	417.457	417.169	4	C24H23N3O4	5-(4-METHYL-BENZOYLAMINO)-BIPHENYL-3,4'-DICARBOXYLIC ACID 3-DIMETHYLAMIDE-4'-HYDROXYAMIDE	experimental	experimental
5028	dbank_005028	-8.3	16750059	DB07666	448.461	448.118	6	C21H19F3N4O2S	(3R,4S)-1-{6-[3-(METHYLSULFONYL)PHENYL]PYRIMIDIN-4-YL}-4-(2,4,5-TRIFLUOROPHENYL)PYRROLIDIN-3-AMINE	experimental	experimental
5048	dbank_005048	-8.3	24941254	DB07691	436.48	436.109	5	C23H20N2O5S	2-({[3-(3,4-dihydroisoquinolin-2(1H)-ylsulfonyl)phenyl]carbonyl}amino)benzoic acid	experimental	experimental
5056	dbank_005056	-8.3	11987804	DB07700	395.534	395.246	2	C25H33NO3	3-CARBOXAMIDO-1,3,5(10)-ESTRATRIEN-17(R)-SPIRO-2'(5',5'-DIMETHYL-6'OXO)TETRAHYDROPYRAN	experimental	experimental
5147	dbank_005147	-8.3	16040261	DB07804	488.969	488.07	7	C17H21ClN6O5S2	5-(5-CHLORO-2-THIENYL)-N-{(3S)-1-[(1S)-1-METHYL-2-MORPHOLIN-4-YL-2-OXOETHYL]-2-OXOPYRROLIDIN-3-YL}-1H-1,2,4-TRIAZOLE-3-SULFONAMIDE	experimental	experimental
5149	dbank_005149	-8.3	446136	DB07806	441.543	441.172	5	C23H27N3O4S	(2R,4S)-2-[(R)-BENZYLCARBAMOYL-PHENYLACETYL-METHYL]-5,5-DIMETHYL-THIAZOLIDINE-4-CARBOXYLIC ACID	experimental	experimental
5177	dbank_005177	-8.3	11952989	DB07837	378.423	378.137	3	C25H18N2O2	[4-(5-naphthalen-2-yl-1H-pyrrolo[2,3-b]pyridin-3-yl)phenyl]acetic acid	experimental	experimental
5185	dbank_005185	-8.3	25113171	DB07845	484.503	484.133	8	C22H21FN6O4S	2-fluoro-6-{[2-({2-methoxy-4-[(methylsulfonyl)methyl]phenyl}amino)-7H-pyrrolo[2,3-d]pyrimidin-4-yl]amino}benzamide	experimental	experimental
5195	dbank_005195	-8.3	16122633	DB07856	389.881	389.141	4	C22H20ClN5	6-{4-[4-(4-CHLOROPHENYL)PIPERIDIN-4-YL]PHENYL}-9H-PURINE	experimental	experimental
5292	dbank_005292	-8.3	16040294	DB07966	381.433	381.17	6	C22H19N7	[4-({4-[(5-cyclopropyl-1H-pyrazol-3-yl)amino]quinazolin-2-yl}amino)phenyl]acetonitrile	experimental	experimental
5325	dbank_005325	-8.3	9547915	DB08003	486.541	486.157	6	C23H26N4O6S	ISOTHIAZOLIDINONE ANALOG	experimental	experimental
5394	dbank_005394	-8.3	24864821	DB08079	383.403	383.138	6	C22H17N5O2	AMG-208	investigational	investigational
5403	dbank_005403	-8.3	5326868	DB08091	444.501	444.196	4	C26H25FN4O2	3-FLUORO-5-MORPHOLIN-4-YL-N-[3-(2-PYRIDIN-4-YLETHYL)-1H-INDOL-5-YL]BENZAMIDE	experimental	experimental
5423	dbank_005423	-8.3	24901696	DB08111	302.33	302.117	4	C18H14N4O	4-[(6-phenyl[1,2,4]triazolo[4,3-b]pyridazin-3-yl)methyl]phenol	experimental	experimental
5501	dbank_005501	-8.3	46937132	DB08197	363.388	363.15	6	C20H18FN5O	(5E,7S)-2-amino-7-(4-fluoro-2-pyridin-3-ylphenyl)-4-methyl-7,8-dihydroquinazolin-5(6H)-one oxime	experimental	experimental
5536	dbank_005536	-8.3	447656	DB08241	366.417	366.18	6	C19H22N6O2	4-(6-CYCLOHEXYLMETHOXY-9H-PURIN-2-YLAMINO)--BENZAMIDE	experimental	experimental
5581	dbank_005581	-8.3	9999276	DB08299	371.346	371.091	6	C21H13N3O4	4-[8-(3-nitrophenyl)-1,7-naphthyridin-6-yl]benzoic acid	experimental	experimental
5587	dbank_005587	-8.3	44129631	DB08305	427.581	427.16	5	C19H29N3O4S2	(3R)-3-cyclopentyl-6-methyl-7-[(4-methylpiperazin-1-yl)sulfonyl]-3,4-dihydro-2H-1,2-benzothiazine 1,1-dioxide	experimental	experimental
5618	dbank_005618	-8.3	24779678	DB08345	345.361	345.145	7	C17H15N9	4-(2-(1H-IMIDAZOL-4-YL)ETHYLAMINO)-2-(PHENYLAMINO)PYRAZOLO[1,5-A][1,3,5]TRIAZINE-8-CARBONITRILE	experimental	experimental
5627	dbank_005627	-8.3	24779676	DB08354	375.814	375.1	6	C19H14ClN7	2-(4-CHLOROBENZYLAMINO)-4-(PHENYLAMINO)PYRAZOLO[1,5-A][1,3,5]TRIAZINE-8-CARBONITRILE	experimental	experimental
5667	dbank_005667	-8.3	25243828	DB08400	380.361	380.135	3	C19H19F3N2O3	4-(3-{[5-(trifluoromethyl)pyridin-2-yl]oxy}benzyl)piperidine-1-carboxylic acid	experimental	experimental
5719	dbank_005719	-8.3	10224714	DB08463	431.533	431.243	7	C24H29N7O	(2R)-2-({9-(1-methylethyl)-6-[(4-pyridin-2-ylbenzyl)amino]-9H-purin-2-yl}amino)butan-1-ol	experimental	experimental
5764	dbank_005764	-8.3	24871491	DB08513	377.397	377.149	7	C20H19N5O3	[4-({5-(AMINOCARBONYL)-4-[(3-METHYLPHENYL)AMINO]PYRIMIDIN-2-YL}AMINO)PHENYL]ACETIC ACID	experimental	experimental
5786	dbank_005786	-8.3	44629554	DB08538	381.382	381.151	6	C19H17F2N7	N-((2-aminopyrimidin-5-yl)methyl)-5-(2,6-difluorophenyl)-3-ethylpyrazolo[1,5-a]pyrimidin-7-amine	experimental	experimental
5793	dbank_005793	-8.3	4369485	DB08546	448.471	448.175	8	C24H24N4O5	4-[(3AS,4R,7R,8AS,8BR)-2-(1,3-BENZODIOXOL-5-YLMETHYL)-7-HYDROXY-1,3-DIOXODECAHYDROPYRROLO[3,4-A]PYRROLIZIN-4-YL]BENZENECARBOXIMIDAMIDE	experimental	experimental
5813	dbank_005813	-8.3	5289411	DB08572	370.406	370.175	7	C18H22N6O3	4-{[4-AMINO-6-(CYCLOHEXYLMETHOXY)-5-NITROSOPYRIMIDIN-2-YL]AMINO}BENZAMIDE	experimental	experimental
5842	dbank_005842	-8.3	9824580	DB08607	441.54	441.161	5	C24H27NO5S	(5R)-5-(4-{[(2R)-6-HYDROXY-2,5,7,8-TETRAMETHYL-3,4-DIHYDRO-2H-CHROMEN-2-YL]METHOXY}BENZYL)-1,3-THIAZOLIDINE-2,4-DIONE	experimental	experimental
5968	dbank_005968	-8.3	16741238	DB08749	418.531	418.237	5	C25H30N4O2	3-(2-AMINO-6-BENZOYLQUINAZOLIN-3(4H)-YL)-N-CYCLOHEXYL-N-METHYLPROPANAMIDE	experimental	experimental
6182	dbank_006182	-8.3	11476460	DB09042	450.323	450.085	9	C17H16FN6O6P	Tedizolid phosphate	approved	approved
6184	dbank_006184	-8.3	6451149	DB09048	578.603	578.248	4	C30H32F6N4O	Netupitant	approved; investigational	approved	investigational
6330	dbank_006330	-8.3	11250029	DB09272	569.662	569.264	7	C32H35N5O5	Eluxadoline	approved; investigational	approved	investigational
6555	dbank_006555	-8.3	10074640	DB11526	498.65	498.22	6	C28H30N6OS	Masitinib	investigational; vet_approved	investigational	vet_approved
6701	dbank_006701	-8.3	59472121	DB11794	463.56	463.168	7	C24H25N5O3S	Berzosertib	investigational	investigational
6702	dbank_006702	-8.3	56949517	DB11795	433.431	433.161	5	C22H22F3N3O3	GSK-2636771	investigational	investigational
6703	dbank_006703	-8.3	11319217	DB11796	583.498	583.158	10	C25H26N7O8P	Fostemsavir	investigational	investigational
6744	dbank_006744	-8.3	11753673	DB11855	597.76	597.332	6	C35H43N5O4	Revefenacin	approved; investigational	approved	investigational
6752	dbank_006752	-8.3	49867930	DB11870	469.412	469.142	3	C22H20F5N3O3	RG-4733	investigational	investigational
6753	dbank_006753	-8.3	11505444	DB11871	617.76	617.256	7	C34H39N3O6S	PF-00610355	investigational	investigational
6766	dbank_006766	-8.3	54575456	DB11891	508.56	508.164	11	C23H24N8O4S	CUDC-907	investigational	investigational
6842	dbank_006842	-8.3	46220502	DB12001	506.606	506.272	7	C27H32F2N8	Abemaciclib	approved; investigational	approved	investigational
6878	dbank_006878	-8.3	443289	DB12054	610.712	610.311	7	C31H42N6O7	BQ-123	investigational	investigational
6993	dbank_006993	-8.3	60956	DB12222	518.57	518.217	8	C28H30N4O6	Lurtotecan	investigational	investigational
7022	dbank_007022	-8.3	10200813	DB12260	397.406	397.144	4	C21H20FN3O4	Radiprodil	investigational	investigational
7029	dbank_007029	-8.3	66571548	DB12269	479.93	479.147	8	C23H22ClN7O3	PF-06273340	investigational	investigational
7042	dbank_007042	-8.3	51352361	DB12285	409.41	409.102	6	C17H17F2N5O3S	Verubecestat	investigational	investigational
7103	dbank_007103	-8.3	44599207	DB12371	516.605	516.26	5	C29H35F3N2O3	Siponimod	approved; investigational	approved	investigational
7124	dbank_007124	-8.3	9841854	DB12399	361.39	361.078	4	C18H16FNO4S	Polmacoxib	investigational	investigational
7146	dbank_007146	-8.3	24946690	DB12426	543.46	543.106	6	C21H20F7N3O4S	Bitopertin	investigational	investigational
7195	dbank_007195	-8.3	16722836	DB12500	524.678	524.257	8	C27H36N6O3S	Fedratinib	approved; investigational	approved	investigational
7217	dbank_007217	-8.3	46892373	DB12535	349.369	349.134	5	C19H16FN5O	AC-430	investigational	investigational
7234	dbank_007234	-8.3	46926973	DB12561	396.454	396.17	6	C23H20N6O	WNT-974	investigational	investigational
7260	dbank_007260	-8.3	4413	DB12598	347.378	347.138	6	C19H17N5O2	Nafamostat	investigational	investigational
7338	dbank_007338	-8.3	11633038	DB12720	415.421	415.154	6	C21H22FN3O5	Nivocasan	investigational	investigational
7340	dbank_007340	-8.3	57339445	DB12724	644.71	644.228	6	C32H35F3N4O5S	AZD-7295	investigational	investigational
7370	dbank_007370	-8.3	148138	DB12769	443.453	443.18	10	C21H25N5O6	Lometrexol	investigational	investigational
7392	dbank_007392	-8.3	213037	DB12805	576.48	574.981	6	C21H19Cl2N3O6S3	Ataciguat	investigational	investigational
7416	dbank_007416	-8.3	17754438	DB12848	372.392	372.145	7	C19H16N8O	PF-04217903	investigational	investigational
7441	dbank_007441	-8.3	24737629	DB12886	402.449	402.166	3	C24H20F2N4	GSK-1521498	investigational	investigational
7442	dbank_007442	-8.3	66558664	DB12887	572.75	572.336	6	C34H44N4O4	Tazemetostat	investigational	investigational
7454	dbank_007454	-8.3	66555680	DB12903	356.389	356.139	4	C20H16N6O	DEBIO-1347	investigational	investigational
7542	dbank_007542	-8.3	46213929	DB13040	469.95	469.179	6	C23H25ClFN7O	Gandotinib	investigational	investigational
7566	dbank_007566	-8.3	9804938	DB13074	474.565	474.238	4	C26H30N6O3	Macimorelin	approved; investigational	approved	investigational
7615	dbank_007615	-8.3	54758501	DB13164	486.59	486.184	6	C26H26N6O2S	Olmutinib	investigational	investigational
7917	dbank_007917	-8.3	26388	DB13591	445.6	445.149	5	C22H27N3O3S2	Metopimazine	experimental	experimental
8086	dbank_008086	-8.3	71447	DB13814	481.52	481.131	5	C24H23N3O6S	Talampicillin	experimental	experimental
8372	dbank_008372	-8.3	102697	DB14672	328.75	328.061	3	C17H13ClN2O3	Oxazepam acetate	experimental	experimental
8449	dbank_008449	-8.3	53373585	DB14859	613.535	613.163	6	C29H29FN3O9P	Fosifloxuridine nafalbenamide	investigational	investigational
8460	dbank_008460	-8.3	77843966	DB14879	752.21	751.15	13	C30H34ClN7O10S2	Cefiderocol	approved; investigational	approved	investigational
8464	dbank_008464	-8.3	60143346	DB14885	414.396	414.153	6	C19H17F3N8	PF-05180999	investigational	investigational
8469	dbank_008469	-8.3	129103609	DB14896	380.427	380.176	5	C20H21FN6O	Selitrectinib	investigational	investigational
8507	dbank_008507	-8.3	91766	DB15006	488.77	488.036	2	C21H11ClF6N2O3	Flufenoxuron	investigational	investigational
8569	dbank_008569	-8.3	122460381	DB15126	519.625	519.276	6	C28H34FN7O2	IMG-7289	investigational	investigational
8598	dbank_008598	-8.3	44462738	DB15190	458.526	458.218	7	C24H26N8O2	GLPG-0259	investigational	investigational
8663	dbank_008663	-8.3	16659285	DB15308	388.434	388.144	4	C24H16N6	Ridinilazole	investigational	investigational
8667	dbank_008667	-8.3	59552698	DB15319	620.67	620.152	10	C26H29FN6O7S2	VM4-037	investigational	investigational
8679	dbank_008679	-8.3	135390910	DB15343	501.08	500.246	5	C29H33ClN6	HM-43239	investigational	investigational
8715	dbank_008715	-8.3	118599727	DB15418	399.378	399.123	5	C20H18FN3O5	AZD-9977	investigational	investigational
8732	dbank_008732	-8.3	60195662	DB15450	428.463	428.154	4	C26H21FN2O3	PF-05105679	investigational	investigational
8733	dbank_008733	-8.3	54674461	DB15456	426.388	426.136	8	C19H16F2N8O2	Vericiguat	investigational	investigational
83	dbank_000083	-8.2	5212	DB00203	474.576	474.205	8	C22H30N6O4S	Sildenafil	approved; investigational	approved	investigational
280	dbank_000280	-8.2	57514439	DB00438	546.576	546.099	10	C22H22N6O7S2	Ceftazidime	approved	approved
445	dbank_000445	-8.2	2247	DB00637	458.57	458.248	4	C28H31FN4O	Astemizole	approved; withdrawn	approved	withdrawn
471	dbank_000471	-8.2	4848	DB00670	351.402	351.17	5	C19H21N5O2	Pirenzepine	approved	approved
493	dbank_000493	-8.2	30323	DB00694	527.52	527.179	11	C27H29NO10	Daunorubicin	approved	approved
527	dbank_000527	-8.2	5073	DB00734	410.485	410.212	4	C23H27FN4O2	Risperidone	approved; investigational	approved	investigational
637	dbank_000637	-8.2	110634	DB00862	488.603	488.221	8	C23H32N6O4S	Vardenafil	approved	approved
753	dbank_000753	-8.2	31703	DB00997	543.519	543.174	12	C27H29NO11	Doxorubicin	approved; investigational	approved	investigational
801	dbank_000801	-8.2	54675769	DB01051	612.624	612.232	9	C31H36N2O11	Novobiocin	approved; investigational; vet_approved	approved	investigational	vet_approved
1048	dbank_001048	-8.2	6918155	DB01410	540.697	540.309	6	C32H44O7	Ciclesonide	approved; investigational	approved	investigational
1091	dbank_001091	-8.2	61791	DB01459	492.611	492.253	4	C31H32N4O2	Bezitramide	experimental; illicit; withdrawn	experimental	illicit	withdrawn
1395	dbank_001395	-8.2	446202	DB01831	533.431	533.142	11	C21H24N7O8P	Tryptophanyl-5'amp	experimental	experimental
1398	dbank_001398	-8.2	449366	DB01834	501.552	501.157	8	C24H27N3O7S	(9R,10R)-9-(S-glutathionyl)-10-hydroxy-9,10-dihydrophenanthrene	experimental	experimental
1400	dbank_001400	-8.2	446399	DB01836	499.025	498.149	5	C25H27ClN4O3S	[4-(6-Chloro-Naphthalene-2-Sulfonyl)-Piperazin-1-Yl]-(3,4,5,6-Tetrahydro-2h-[1,4']Bipyridinyl-4-Yl)-Methanone	experimental	experimental
1443	dbank_001443	-8.2	446795	DB01893	517.324	517.076	12	C17H21N5O10P2	N6-Benzyl Adenosine-5'-Diphosphate	experimental	experimental
1449	dbank_001449	-8.2	448406	DB01906	272.22	272.066	8	C11H8N6O3	3-(5-amino-7-hydroxy-(1,2,3)triazolo(4,5-d)pyrimidin-2-yl)benzoic acid	experimental	experimental
1450	dbank_001450	-8.2	5287515	DB01908	637.617	637.219	9	C32H36N3O9P	RU85493	experimental	experimental
1491	dbank_001491	-8.2	147071	DB01960	459.243	459.056	14	C11H19N5O11P2	7-methyl-7,8-dihydroguanosine-5'-diphosphate	experimental	experimental
1526	dbank_001526	-8.2	5481481	DB02009	652.822	652.362	6	C39H48N4O5	L-756423	experimental	experimental
1530	dbank_001530	-8.2	98792	DB02015	443.413	443.155	11	C19H21N7O6	Dihydrofolic Acid	experimental	experimental
1536	dbank_001536	-8.2	160024	DB02021	279.224	279.066	4	C12H10FN3O4	Fidarestat	experimental	experimental
1587	dbank_001587	-8.2	36735	DB02082	522.196	522.007	15	C10H17N6O13P3	Phosphoaminophosphonic acid guanylate ester	experimental	experimental
1658	dbank_001658	-8.2	448317	DB02177	478.563	478.167	6	C25H26N4O4S	1-Acetyl-4-(4-{4-[(2-Ethoxyphenyl)Thio]-3-Nitrophenyl}Pyridin-2-Yl)Piperazine	experimental	experimental
1694	dbank_001694	-8.2	102194235	DB02226	661.86	661.377	6	C42H45N8	3,8-Diamino-6-Phenyl-5-[6-[1-[2-[(1,2,3,4-Tetrahydro-9-Acridinyl)Amino]Ethyl]-1h-1,2,3-Triazol-4-Yl]Hexyl]-Phenanthridinium	experimental	experimental
1721	dbank_001721	-8.2	9887303	DB02258	401.498	401.199	4	C26H27NO3	SR11254	experimental	experimental
1731	dbank_001731	-8.2	446978	DB02269	546.682	546.287	4	C34H36N5O2	[4-({[5-Benzyloxy-1-(3-Carbamimidoyl-Benzyl)-1h-Indole-2-Carbonyl]-Amino}-Methyl)-Phenyl]-Trimethyl-Ammonium	experimental	experimental
1772	dbank_001772	-8.2	446201	DB02323	677.83	677.379	10	C37H51N5O7	EM-1745	experimental	experimental
1796	dbank_001796	-8.2	445756	DB02354	423.513	423.217	5	C25H25N7	4-{[1-Methyl-5-(2-Methyl-Benzoimidazol-1-Ylmethyl)-1h-Benzoimidazol-2-Ylmethyl]-Amino}-Benzamidine	experimental	experimental
1874	dbank_001874	-8.2	444789	DB02449	503.613	503.188	5	C28H29N3O4S	3-(1h-Indol-3-Yl)-2-[4-(4-Phenyl-Piperidin-1-Yl)-Benzenesulfonylamino]-Propionic Acid	experimental	experimental
1914	dbank_001914	-8.2	163884	DB02498	662.46	662.138	14	C22H30N7O13P2	Carba-nicotinamide-adenine-dinucleotide	experimental	experimental
1933	dbank_001933	-8.2	5288641	DB02519	342.326	342.031	6	C16H10N2O5S	Indirubin-5-sulphonate	experimental	experimental
1948	dbank_001948	-8.2	444725	DB02540	482.443	482.144	11	C23H22N4O8	(10S)-10-Formyl-5,8,10-Trideazafolic Acid	experimental	experimental
2097	dbank_002097	-8.2	5326608	DB02723	492.592	492.215	8	C22H32N6O5S	4-Oxo-2-Phenylmethanesulfonyl-Octahydro-Pyrrolo[1,2-a]Pyrazine-6-Carboxylic Acid [1-(N-Hydroxycarbamimidoyl)-Piperidin-4-Ylmethyl]-Amide	experimental	experimental
2323	dbank_002323	-8.2	444215	DB03020	663.425	663.109	15	C21H27N7O14P2	5-beta-D-ribofuranosylnicotinamide adenine dinucleotide	experimental	experimental
2364	dbank_002364	-8.2	445754	DB03076	631.738	631.235	8	C34H37N3O7S	3-[[(3R,4S,5S,6R)-7-Benzyl-4,5-dihydroxy-1,1-dioxo-3,6-bis(phenoxymethyl)-1,2,7-thiadiazepan-2-yl]methyl]-N-methylbenzamide	experimental	experimental
2447	dbank_002447	-8.2	448108	DB03186	797.348	797.026	19	C19H27N7O20P4	Adenylate-3'-phosphate-[[2'-deoxy-uridine-5'-phosphate]-3'-phosphate]	experimental	experimental
2559	dbank_002559	-8.2	449029	DB03325	509.493	509.133	13	C19H23N7O8S	Tyrosyladenylate	experimental	experimental
2604	dbank_002604	-8.2	444746	DB03383	443.898	443.141	3	C23H23ClFN3O3	5-Chloro-1h-Indole-2-Carboxylic Acid [1-(4-Fluorobenzyl)-2-(4-Hydroxypiperidin-1yl)-2-Oxoethyl]Amide	experimental	experimental
2660	dbank_002660	-8.2	5885	DB03461	743.405	743.075	17	C21H28N7O17P3	Nicotinamide adenine dinucleotide phosphate	experimental	experimental
2682	dbank_002682	-8.2	439220	DB03491	427.201	427.029	11	C10H15N5O10P2	2'-Deoxyguanosine-5'-Diphosphate	experimental	experimental
2685	dbank_002685	-8.2	5287969	DB03496	401.84	401.103	6	C21H20ClNO5	Alvocidib	experimental; investigational	experimental	investigational
2815	dbank_002815	-8.2	5496989	DB03678	375.414	375.155	3	C23H19F2N3	(6,7-Difluoro-Quinazolin-4-Yl)-(1-Methyl-2,2-Diphenyl-Ethyl)-Amine	experimental	experimental
2989	dbank_002989	-8.2	5289382	DB03893	679.491	679.086	15	C21H27N7O13P2S	Thionicotinamide-Adenine-Dinucleotide	experimental	experimental
3001	dbank_003001	-8.2	4369234	DB03907	473.396	473.13	13	C19H19N7O8	N-{3-[5-(6-Amino-Purin-9-Yl)-3,4-Dihydroxy-Tetrahydro-Furan-2-Yl]-Allyl}-2,3-Dihydroxy-5-Nitro-Benzamide	experimental	experimental
3041	dbank_003041	-8.2	447945	DB03957	534.481	533.207	6	C25H33Cl2N7O2	SP2456	experimental	experimental
3103	dbank_003103	-8.2	657140	DB04044	422.344	422.075	7	C21H14N2O8	4-{2-[(3-Nitrobenzoyl)Amino]Phenoxy}Phthalic Acid	experimental	experimental
3147	dbank_003147	-8.2	44308490	DB04098	550.513	550.159	10	C28H26N2O10	Balanol	experimental	experimental
3221	dbank_003221	-8.2	444974	DB04190	636.733	636.284	9	C38H40N2O7	Inhibitor Bea425	experimental	experimental
3277	dbank_003277	-8.2	444729	DB04264	482.443	482.144	11	C23H22N4O8	(10R)-10-Formyl-5,8,10-Trideazafolic Acid	experimental	experimental
3323	dbank_003323	-8.2	445072	DB04322	443.453	443.18	10	C21H25N5O6	LY249543	experimental	experimental
3353	dbank_003353	-8.2	5287651	DB04362	593.378	593.026	14	C17H19N6O12P2S	Adenosine Diphosphate 5-(Beta-Ethyl)-4-Methyl-Thiazole-2-Carboxylic Acid	experimental	experimental
3453	dbank_003453	-8.2	447518	DB04495	579.581	579.213	8	C30H34N3O7P	RU81843	experimental	experimental
3528	dbank_003528	-8.2	5287492	DB04591	439.461	439.193	6	C22H23F2N7O	N-{2,2-DIFLUORO-2-[(2R)-PIPERIDIN-2-YL]ETHYL}-2-[2-(1H-1,2,4-TRIAZOL-1-YL)BENZYL][1,3]OXAZOLO[4,5-C]PYRIDIN-4-AMINE	experimental	experimental
3541	dbank_003541	-8.2	5330608	DB04607	461.321	460.016	5	C20H14Cl2N4O3S	PHENYLAMINOIMIDAZO(1,2-ALPHA)PYRIDINE	experimental	experimental
3680	dbank_003680	-8.2	5326924	DB04790	382.413	382.164	8	C20H22N4O4	2,5-bis-O-{3-[amino(imino)methyl]phenyl}-1,4:3,6-dianhydro-D-glucitol	experimental	experimental
3750	dbank_003750	-8.2	153270	DB04875	523.538	523.207	7	C26H29N5O7	Pralnacasan	investigational	investigational
3767	dbank_003767	-8.2	9574101	DB04898	473.565	473.264	7	C24H35N5O5	Ximelagatran	approved; investigational; withdrawn	approved	investigational	withdrawn
3912	dbank_003912	-8.2	10173277	DB05611	418.501	418.212	8	C23H26N6O2	Apilimod	investigational	investigational
3913	dbank_003913	-8.2	9846537	DB05616	449.467	449.17	9	C23H23N5O5	4'-Methylene-5,8,10-trideazaaminopterin	investigational	investigational
3964	dbank_003964	-8.2	42642648	DB05944	466.94	466.098	8	C22H19ClN6O2S	Varlitinib	investigational	investigational
4072	dbank_004072	-8.2	9939609	DB06311	666.78	666.265	5	C36H38F4N4O2S	Darapladib	investigational	investigational
4378	dbank_004378	-8.2	9547940	DB06918	249.31	249.127	2	C16H15N3	2-(2-METHYLPHENYL)-1H-INDOLE-6-CARBOXIMIDAMIDE	experimental	experimental
4412	dbank_004412	-8.2	24180717	DB06962	412.48	412.179	3	C26H24N2O3	(5-(aminomethyl)-2H-spiro[benzofuran-3,4'-piperidine]-1'-yl)(5-(phenylethynyl)furan-2-yl)methanone	experimental	experimental
4423	dbank_004423	-8.2	445841	DB06976	366.417	366.18	4	C19H22N6O2	1-(5-OXO-2,3,5,9B-TETRAHYDRO-1H-PYRROLO[2,1-A]ISOINDOL-9-YL)-3-(5-PYRROLIDIN-2-YL-1H-PYRAZOL-3-YL)-UREA	experimental	experimental
4424	dbank_004424	-8.2	49866474	DB06977	383.446	383.175	5	C23H21N5O	(2S)-1-{[5-(1H-Indazol-5-yl)-3-pyridinyl]oxy}-3-(7aH-indol-3-yl)-2-propanamine	experimental	experimental
4484	dbank_004484	-8.2	25023707	DB07043	407.472	407.218	9	C20H25N9O	7-amino-2-tert-butyl-4-(4-pyrimidin-2-ylpiperazin-1-yl)pyrido[2,3-d]pyrimidine-6-carboxamide	experimental	experimental
4511	dbank_004511	-8.2	6852141	DB07074	377.393	377.138	5	C21H19N3O4	6-CARBAMIMIDOYL-4-(3-HYDROXY-2-METHYL-BENZOYLAMINO)-NAPHTHALENE-2-CARBOXYLIC ACID METHYL ESTER	experimental	experimental
4555	dbank_004555	-8.2	46937052	DB07124	384.434	384.17	7	C22H20N6O	(2S)-1-(6H-INDOL-3-YL)-3-{[5-(7H-PYRAZOLO[3,4-C]PYRIDIN-5-YL)PYRIDIN-3-YL]OXY}PROPAN-2-AMINE	experimental	experimental
4574	dbank_004574	-8.2	6914621	DB07145	433.5	433.2	5	C25H27N3O4	(2R)-N-HYDROXY-2-[(3S)-3-METHYL-3-{4-[(2-METHYLQUINOLIN-4-YL)METHOXY]PHENYL}-2-OXOPYRROLIDIN-1-YL]PROPANAMIDE	experimental	experimental
4575	dbank_004575	-8.2	11553058	DB07146	398.5	398.211	4	C25H26N4O	2,3-DIPHENYL-N-(2-PIPERAZIN-1-YLETHYL)FURO[2,3-B]PYRIDIN-4-AMINE	experimental	experimental
4594	dbank_004594	-8.2	23624249	DB07168	360.416	360.181	7	C19H20N8	[4-({4-[(5-cyclopropyl-1H-pyrazol-3-yl)amino]-6-(methylamino)pyrimidin-2-yl}amino)phenyl]acetonitrile	experimental	experimental
4664	dbank_004664	-8.2	15942655	DB07247	358.393	358.143	3	C21H18N4O2	[2'-HYDROXY-3'-(1H-PYRROLO[3,2-C]PYRIDIN-2-YL)-BIPHENYL-3-YLMETHYL]-UREA	experimental	experimental
4669	dbank_004669	-8.2	25011728	DB07252	419.842	419.046	8	C17H14ClN5O4S	3-({4-[(5-chloro-1,3-benzodioxol-4-yl)amino]pyrimidin-2-yl}amino)benzenesulfonamide	experimental	experimental
4672	dbank_004672	-8.2	25011731	DB07255	425.868	425.125	8	C21H20ClN5O3	N'-(5-CHLORO-1,3-BENZODIOXOL-4-YL)-N-(3-MORPHOLIN-4-YLPHENYL)PYRIMIDINE-2,4-DIAMINE	experimental	experimental
4768	dbank_004768	-8.2	10411846	DB07359	458.555	458.045	5	C19H15FN6OS3	3-[(4-fluorophenyl)sulfanyl]-N-(4-methyl-1,3-thiazol-2-yl)-6-[(4-methyl-4H-1,2,4-triazol-3-yl)sulfanyl]pyridine-2-carboxamide	experimental	experimental
4820	dbank_004820	-8.2	10174090	DB07422	474.259	474.046	5	C17H10F8N2O5	(2S)-2-hydroxy-2-methyl-N-[4-nitro-3-(trifluoromethyl)phenyl]-3-(pentafluorophenoxy)propanamide	experimental	experimental
4821	dbank_004821	-8.2	9824562	DB07423	441.358	441.115	6	C19H18F3N3O6	(2S)-3-[4-(acetylamino)phenoxy]-2-hydroxy-2-methyl-N-[4-nitro-3-(trifluoromethyl)phenyl]propanamide	experimental	experimental
4839	dbank_004839	-8.2	6540255	DB07444	321.373	321.148	3	C19H19N3O2	6-(3-AMINOPROPYL)-4,9-DIMETHYLPYRROLO[3,4-C]CARBAZOLE-1,3(2H,6H)-DIONE	experimental	experimental
4851	dbank_004851	-8.2	2398	DB07457	384.43	384.159	3	C23H20N4O2	3-[1-(3-AMINOPROPYL)-1H-INDOL-3-YL]-4-(1H-INDOL-3-YL)-1H-PYRROLE-2,5-DIONE	experimental	experimental
4898	dbank_004898	-8.2	24812717	DB07514	397.472	397.19	5	C24H23N5O	3-(2-aminoquinazolin-6-yl)-1-(3,3-dimethylindolin-6-yl)-4-methylpyridin-2(1H)-one	experimental	experimental
4977	dbank_004977	-8.2	24894158	DB07608	447.917	447.146	4	C24H22ClN5O2	N-(5-{[(2S)-4-amino-2-(3-chlorophenyl)butanoyl]amino}-1H-indazol-3-yl)benzamide	experimental	experimental
5040	dbank_005040	-8.2	16122567	DB07680	431.829	431.015	4	C20H15ClNO4PS	[(1S)-1-(5-CHLORO-1-BENZOTHIEN-3-YL)-2-(2-NAPHTHYLAMINO)-2-OXOETHYL]PHOSPHONIC ACID	experimental	experimental
5044	dbank_005044	-8.2	23586145	DB07685	402.471	402.147	7	C18H22N6O3S	4-{[5-(CYCLOHEXYLMETHOXY)[1,2,4]TRIAZOLO[1,5-A]PYRIMIDIN-7-YL]AMINO}BENZENESULFONAMIDE	experimental	experimental
5130	dbank_005130	-8.2	46937091	DB07786	424.88	424.13	4	C22H21ClN4O3	1-((1R,2S)-1-{2-[2-(4-CHLOROPHENYL)-1,3-BENZOXAZOL-7-YL]ETHYL}-2-HYDROXYPROPYL)-1H-IMIDAZOLE-4-CARBOXAMIDE	experimental	experimental
5131	dbank_005131	-8.2	448890	DB07787	393.454	393.185	3	C23H24FN3O2	5-FLUORO-1-[4-(4-PHENYL-3,6-DIHYDROPYRIDIN-1(2H)-YL)BUTYL]QUINAZOLINE-2,4(1H,3H)-DIONE	experimental	experimental
5143	dbank_005143	-8.2	24794406	DB07800	480.923	480.066	5	C23H17ClN4O4S	N-(2-(((5-CHLORO-2-PYRIDINYL)AMINO)SULFONYL)PHENYL)-4-(2-OXO-1(2H)-PYRIDINYL)BENZAMIDE	experimental	experimental
5301	dbank_005301	-8.2	10342449	DB07975	427.322	427.084	4	C20H14F5NO4	2-({[3,5-DIFLUORO-3'-(TRIFLUOROMETHOXY)BIPHENYL-4-YL]AMINO}CARBONYL)CYCLOPENT-1-ENE-1-CARBOXYLIC ACID	experimental	experimental
5376	dbank_005376	-8.2	11291932	DB08058	380.415	380.165	4	C21H21FN4O2	4-[3-(1,4-diazepan-1-ylcarbonyl)-4-fluorobenzyl]phthalazin-1(2H)-one	experimental	experimental
5381	dbank_005381	-8.2	5288679	DB08063	384.427	384.147	4	C24H20N2O3	1-BENZYL-3-(4-METHOXYPHENYLAMINO)-4-PHENYLPYRROLE-2,5-DIONE	experimental	experimental
5388	dbank_005388	-8.2	10172943	DB08073	397.472	397.19	4	C24H23N5O	(2S)-1-(1H-INDOL-3-YL)-3-{[5-(3-METHYL-1H-INDAZOL-5-YL)PYRIDIN-3-YL]OXY}PROPAN-2-AMINE	experimental	experimental
5534	dbank_005534	-8.2	11675645	DB08239	397.461	397.197	2	C23H25F2N3O	(2S)-4-(2,5-DIFLUOROPHENYL)-N-METHYL-2-PHENYL-N-PIPERIDIN-4-YL-2,5-DIHYDRO-1H-PYRROLE-1-CARBOXAMIDE	experimental	experimental
5542	dbank_005542	-8.2	447655	DB08248	402.471	402.147	7	C18H22N6O3S	3-(6-CYCLOHEXYLMETHOXY-9H-PURIN-2-YLAMINO)-BENZENESULFONAMIDE	experimental	experimental
5634	dbank_005634	-8.2	23656870	DB08362	384.394	384.145	7	C20H16N8O	N-(3-(8-CYANO-4-(PHENYLAMINO)PYRAZOLO[1,5-A][1,3,5]TRIAZIN-2-YLAMINO)PHENYL)ACETAMIDE	experimental	experimental
5778	dbank_005778	-8.2	4747357	DB08530	355.414	355.188	4	C18H23N6O2	7-BENZYL-1,3-DIMETHYL-8-PIPERAZIN-1-YL-3,7-DIHYDRO-PURINE-2,6-DIONE	experimental	experimental
5787	dbank_005787	-8.2	10042950	DB08539	341.409	341.164	4	C21H19N5	3-cyclopropyl-5-phenyl-N-(pyridin-3-ylmethyl)pyrazolo[1,5-a]pyrimidin-7-amine	experimental	experimental
5929	dbank_005929	-8.2	5003498	DB08709	313.349	313.11	2	C21H15NO2	2,3-diphenyl-1H-indole-7-carboxylic acid	experimental	experimental
5950	dbank_005950	-8.2	24764434	DB08731	403.384	403.106	6	C23H17NO6	2-[(1R)-2-carboxy-1-(naphthalen-1-ylmethyl)ethyl]-1,3-dioxo-2,3-dihydro-1H-isoindole-5-carboxylic acid	experimental	experimental
6067	dbank_006067	-8.2	10096344	DB08882	472.542	472.234	7	C25H28N8O2	Linagliptin	approved	approved
6077	dbank_006077	-8.2	24826799	DB08901	532.559	532.22	5	C29H27F3N6O	Ponatinib	approved; investigational	approved	investigational
6085	dbank_006085	-8.2	44462760	DB08912	519.562	519.101	6	C23H20F3N5O2S2	Dabrafenib	approved; investigational	approved	investigational
6185	dbank_006185	-8.2	71457955	DB09050	666.69	666.175	14	C23H30N12O8S2	Ceftolozane	approved; investigational	approved	investigational
6203	dbank_006203	-8.2	9823820	DB09078	426.86	426.109	4	C21H19ClN4O4	Lenvatinib	approved; investigational	approved	investigational
6305	dbank_006305	-8.2	65918	DB09233	598.05	597.188	8	C30H32ClN3O8	Cronidipine	experimental	experimental
6437	dbank_006437	-8.2	3571576	DB11262	658.891	658.4	6	C41H50N6O2	Bisoctrizole	approved	approved
6629	dbank_006629	-8.2	10172827	DB11687	389.448	389.184	6	C21H27NO6	E-6201	investigational	investigational
6633	dbank_006633	-8.2	23649245	DB11692	459.56	459.162	4	C26H25N3O3S	Pavinetant	investigational	investigational
6638	dbank_006638	-8.2	10453870	DB11698	404.45	404.109	5	C21H21FO5S	Ipragliflozin	investigational	investigational
6695	dbank_006695	-8.2	11539025	DB11787	420.536	420.244	4	C24H29FN6	Ralimetinib	investigational	investigational
6783	dbank_006783	-8.2	52918384	DB11912	479.557	479.266	9	C22H34FN7O4	Lanopepden	investigational	investigational
6810	dbank_006810	-8.2	56944144	DB11951	410.425	410.155	5	C22H20F2N4O2	Lemborexant	approved; investigational	approved	investigational
6825	dbank_006825	-8.2	50915138	DB11971	544.58	544.171	4	C27H29F5O4S	Vilaprisan	investigational	investigational
6864	dbank_006864	-8.2	71667668	DB12036	562.719	562.338	9	C30H42N8O3	Naquotinib	investigational	investigational
6874	dbank_006874	-8.2	68289010	DB12048	345.37	345.145	6	C17H15N9	Savolitinib	investigational	investigational
6992	dbank_006992	-8.2	13789	DB12221	340.456	340.204	2	C22H28O3	Canrenone	investigational	investigational
7079	dbank_007079	-8.2	9931954	DB12332	323.371	323.143	2	C19H18FN3O	Rucaparib	approved; investigational	approved	investigational
7151	dbank_007151	-8.2	10430360	DB12432	388.475	388.201	5	C22H24N6O	CC-401	investigational	investigational
7174	dbank_007174	-8.2	72942015	DB12467	315.328	315.09	4	C20H13NO3	TU-100	investigational	investigational
7192	dbank_007192	-8.2	24795070	DB12494	405.425	405.178	5	C20H22F3N5O	SGI-1776	investigational	investigational
7275	dbank_007275	-8.2	24996872	DB12627	456.56	456.183	7	C23H28N4O4S	GSK-1292263	investigational	investigational
7292	dbank_007292	-8.2	25027363	DB12655	504.77	504.339	4	C29H48N2O3S	Patidegib	investigational	investigational
7355	dbank_007355	-8.2	16725726	DB12745	425.484	425.218	8	C21H27N7O3	GSK-690693	investigational	investigational
7361	dbank_007361	-8.2	16124208	DB12756	504.65	504.22	5	C28H32N4O3S	TAK-901	investigational	investigational
7374	dbank_007374	-8.2	24864553	DB12776	472.501	472.175	7	C26H24N4O5	E-6005	investigational	investigational
7389	dbank_007389	-8.2	72435	DB12802	414.41	414.131	7	C22H22O8	Picropodophyllin	investigational	investigational
7396	dbank_007396	-8.2	11998575	DB12812	406.434	406.142	5	C24H22O6	Palomid 529	investigational	investigational
7474	dbank_007474	-8.2	11548630	DB12933	565.282	565.032	7	C20H19F3IN3O5	RO-4987655	investigational	investigational
7605	dbank_007605	-8.2	9829253	DB13135	559.61	559.108	10	C25H25N3O8S2	AGN-201904	investigational	investigational
7895	dbank_007895	-8.2	187764	DB13556	560.6	560.115	11	C23H24N6O7S2	Sulfamazone	experimental	experimental
8159	dbank_008159	-8.2	5311501	DB13950	426.516	426.194	4	C27H26N2O3	WIN 55212-2	experimental	experimental
8204	dbank_008204	-8.2	73412	DB14037	504.708	504.345	6	C30H48O6	Madecassic acid	experimental	experimental
8345	dbank_008345	-8.2	16923	DB14644	474.55	474.225	7	C26H34O8	Methylprednisolone hemisuccinate	approved	approved
8355	dbank_008355	-8.2	26391	DB14654	417.417	417.121	4	C24H19NO6	Bisoxatin acetate	experimental	experimental
8433	dbank_008433	-8.2	57331386	DB14821	456.48	456.144	6	C20H23F3N4O3S	Macozinone	investigational	investigational
8470	dbank_008470	-8.2	44193830	DB14898	464.368	464.128	4	C19H18F6N4O3	Retagliptin	investigational	investigational
8495	dbank_008495	-8.2	44814409	DB14943	440.47	440.182	4	C24H23F3N4O	LGH-447	investigational	investigational
8520	dbank_008520	-8.2	71509318	DB15034	658.652	658.23	8	C33H35N6O7P	PRI-724	investigational	investigational
8579	dbank_008579	-8.2	71262247	DB15145	439.53	439.168	8	C22H25N5O3S	Ziresovir	investigational	investigational
8594	dbank_008594	-8.2	44123754	DB15183	468.406	468.12	7	C22H21N4O6P	Fosmanogepix	investigational	investigational
8609	dbank_008609	-8.2	90055716	DB15206	545.91	545.133	6	C22H29ClN3O9P	Uprifosbuvir	investigational	investigational
8615	dbank_008615	-8.2	118598754	DB15219	340.387	340.165	6	C17H20N6O2	Tomivosertib	investigational	investigational
8655	dbank_008655	-8.2	86291103	DB15295	415.428	415.144	6	C23H18FN5O2	Tenalisib	investigational	investigational
8691	dbank_008691	-8.2	118574930	DB15362	470.46	470.08	3	C25H17F3O4S	LSZ-102	investigational	investigational
8705	dbank_008705	-8.2	90420193	DB15403	588.71	588.243	8	C30H33FN8O2S	Ziritaxestat	investigational	investigational
8749	dbank_008749	-8.2	73386890	DB15498	446.559	446.254	8	C24H30N8O	BOS172722	experimental	experimental
43	dbank_000043	-8.1	6037	DB00158	441.397	441.14	12	C19H19N7O6	Folic acid	approved; nutraceutical; vet_approved	approved	nutraceutical	vet_approved
100	dbank_000100	-8.1	5362440	DB00224	613.789	613.363	7	C36H47N5O4	Indinavir	approved	approved
219	dbank_000219	-8.1	72474	DB00365	359.395	359.165	6	C19H22FN3O3	Grepafloxacin	approved; investigational; withdrawn	approved	investigational	withdrawn
252	dbank_000252	-8.1	969472	DB00402	388.808	388.105	6	C17H17ClN6O3	Eszopiclone	approved; investigational	approved	investigational
406	dbank_000406	-8.1	3157	DB00590	451.475	451.186	9	C23H25N5O5	Doxazosin	approved	approved
648	dbank_000648	-8.1	5281881	DB00875	434.52	434.164	3	C23H25F3N2OS	Flupentixol	approved; investigational; withdrawn	approved	investigational	withdrawn
728	dbank_000728	-8.1	65999	DB00966	514.617	514.237	4	C33H30N4O2	Telmisartan	approved; investigational	approved	investigational
771	dbank_000771	-8.1	3488	DB01016	494.004	493.144	5	C23H28ClN3O5S	Glyburide	approved	approved
1013	dbank_001013	-8.1	441289	DB01337	572.862	572.455	2	C35H60N2O4	Pancuronium	approved	approved
1015	dbank_001015	-8.1	39765	DB01339	557.827	557.432	3	C34H57N2O4	Vecuronium	approved; investigational	approved	investigational
1233	dbank_001233	-8.1	941651	DB01623	443.625	443.17	4	C23H29N3O2S2	Thiothixene	approved	approved
1297	dbank_001297	-8.1	6398417	DB01705	335.386	335.173	3	C17H19N8	Bis(5-Amidino-Benzimidazolyl)Methane	experimental	experimental
1426	dbank_001426	-8.1	5289424	DB01871	460.522	460.2	4	C27H28N2O5	[1-(1-Benzyl-3-Hydroxy-2-Oxo-Propylcarbamoyl)-2-Phenyl-Ethyl]-Carbamic Acid Benzyl Ester	experimental	experimental
1466	dbank_001466	-8.1	72271	DB01933	482.53	482.195	5	C28H26N4O4	7-Hydroxystaurosporine	experimental; investigational	experimental	investigational
2102	dbank_002102	-8.1	5288882	DB02732	719.488	719.135	16	C24H31N7O15P2	[(2R,3S,4R,5R)-5-(4-acetonyl-3-carbamoyl-pyridin-1-ium-1-yl)-3,4-dihydroxy-tetrahydrofuran-2-yl]methyl [[(2R,3S,4R,5R)-5-(6-aminopurin-9-yl)-3,4-dihydroxy-tetrahydrofuran-2-yl]methoxy-hydroxy-phosphoryl] phosphate	experimental	experimental
2178	dbank_002178	-8.1	447961	DB02833	328.349	328.074	7	C14H12N6O2S	[4-(2-Amino-4-Methyl-Thiazol-5-Yl)-Pyrimidin-2-Yl]-(3-Nitro-Phenyl)-Amine	experimental	experimental
2350	dbank_002350	-8.1	446753	DB03060	337.376	337.154	7	C18H19N5O2	Sri-9662	experimental	experimental
2516	dbank_002516	-8.1	5287443	DB03268	555.621	555.237	6	C32H33N3O6	RU82197	experimental	experimental
2564	dbank_002564	-8.1	446186	DB03331	570.596	570.223	10	C30H30N6O6	N-naphthalen-1-ylmethyl-2'-[3,5-dimethoxybenzamido]-2'-deoxy-adenosine	experimental	experimental
2568	dbank_002568	-8.1	4369285	DB03336	439.385	439.136	7	C20H20F3N3O5	BIA	experimental	experimental
2647	dbank_002647	-8.1	444053	DB03447	573.407	573.122	14	C19H24N7O12P	Uridylyl-2'-5'-phospho-adenosine	experimental	experimental
2663	dbank_002663	-8.1	445575	DB03466	388.499	388.204	3	C26H28O3	BMS184394	experimental	experimental
2677	dbank_002677	-8.1	448477	DB03486	441.228	441.045	12	C11H17N5O10P2	Phosphomethylphosphonic acid guanosyl ester	experimental	experimental
2849	dbank_002849	-8.1	121966	DB03723	548.33	548.081	12	C16H26N2O15P2	2'-Deoxy-Thymidine-Beta-L-Rhamnose	experimental	experimental
2940	dbank_002940	-8.1	656948	DB03830	392.263	392.063	10	C14H13N6O6P	Phosphorylated Dihydropteroate	experimental	experimental
3207	dbank_003207	-8.1	5289531	DB04172	612.826	612.346	7	C32H48N6O4S	[2,4,6-Triisopropyl-Phenylsulfonyl-L-[3-Amidino-Phenylalanine]]-Piperazine-N'-Beta-Alanine	experimental	experimental
3295	dbank_003295	-8.1	448025	DB04285	602.591	602.135	6	C31H25F2N4O3PS	{4-[(2s,4e)-2-(1,3-Benzothiazol-2-Yl)-2-(1h-1,2,3-Benzotriazol-1-Yl)-5-Phenylpent-4-Enyl]Phenyl}(Difluoro)Methylphosphonic Acid	experimental	experimental
3365	dbank_003365	-8.1	446917	DB04378	531.686	531.31	5	C32H41N3O4	3-Amino-N-{4-[2-(2,6-Dimethyl-Phenoxy)-Acetylamino]-3-Hydroxy-1-Isobutyl-5-Phenyl-Pentyl}-Benzamide	experimental	experimental
3432	dbank_003432	-8.1	448915	DB04471	428.566	428.246	4	C28H32N2O2	2-Phenyl-1-[4-(2-Piperidin-1-Yl-Ethoxy)-Phenyl]-1,2,3,4-Tetrahydro-Isoquinolin-6-Ol	experimental	experimental
3440	dbank_003440	-8.1	5287525	DB04480	293.338	293.133	2	C18H16FN3	3-(4-Fluorophenyl)-2-(6-Methylpyridin-2-Yl)-5,6-Dihydro-4h-Pyrrolo[1,2-B]Pyrazole	experimental	experimental
3553	dbank_003553	-8.1	5459358	DB04623	625.711	625.279	6	C36H39N3O7	2-ETHOXYETHYL (2S,3S)-4-((S)-2-BENZYL-3-OXO-4-((3AR,8R,8AS)-2-OXO-3,3A,8,8A-TETRAHYDRO-2H-INDENO[1,2-D]OXAZOL-8-YL)-2,3-DIHYDRO-1H-PYRROL-2-YL)-3-HYDROXY-1-PHENYLBUTAN-2-YLCARBAMATE	experimental	experimental
3610	dbank_003610	-8.1	5288329	DB04696	560.619	557.887	3	C24H13Br2ClO4	4-CHLORO-3',3''-DIBROMOPHENOL-1,8-NAPHTHALEIN	experimental	experimental
3676	dbank_003676	-8.1	54708748	DB04785	600.7	600.305	9	C32H44N2O9	Streptolydigin	experimental	experimental
3794	dbank_003794	-8.1	154000	DB04971	392.411	392.137	4	C22H20N2O5	Reglitazar	investigational	investigational
3872	dbank_003872	-8.1	156414	DB05424	485.938	485.163	7	C24H25ClFN5O3	Canertinib	investigational	investigational
3929	dbank_003929	-8.1	9939865	DB05713	459.594	459.263	4	C27H33N5O2	LY-517717	investigational	investigational
4074	dbank_004074	-8.1	24779724	DB06314	359.408	359.095	5	C18H13N7S	SGX-523	investigational	investigational
4107	dbank_004107	-8.1	133090	DB06429	382.454	382.168	3	C25H22N2O2	Talnetant	investigational	investigational
4143	dbank_004143	-8.1	9825701	DB06519	464.55	464.086	5	C24H20N2O4S2	Edaglitazone	investigational	investigational
4198	dbank_004198	-8.1	9828911	DB06645	546.716	546.332	5	C31H42N6O3	Anamorelin	investigational	investigational
4205	dbank_004205	-8.1	172997	DB06666	473.93	473.131	2	C27H21ClFN3O2	Lixivaptan	investigational	investigational
4309	dbank_004309	-8.1	11143173	DB06837	370.399	370.153	5	C20H22N2O5	(2R)-N~4~-hydroxy-2-(3-hydroxybenzyl)-N~1~-[(1S,2R)-2-hydroxy-2,3-dihydro-1H-inden-1-yl]butanediamide	experimental	experimental
4319	dbank_004319	-8.1	44141860	DB06850	385.503	385.248	5	C21H31N5O2	(S)-N-(4-carbamimidoylbenzyl)-1-(2-(cyclohexylamino)ethanoyl)pyrrolidine-2-carboxamide	experimental	experimental
4405	dbank_004405	-8.1	1540	DB06948	323.392	323.175	5	C18H21N5O	2-ANILINO-6-CYCLOHEXYLMETHOXYPURINE	experimental	experimental
4438	dbank_004438	-8.1	60206636	DB06993	458.523	458.18	7	C20H28F2N4O4S	(2S,3S)-4-cyclopropyl-3-{(3R,5R)-3-[2-fluoro-4-(methylsulfonyl)phenyl]-1,2,4-oxadiazolidin-5-yl}-1-[(3S)-3-fluoropyrrolidin-1-yl]-1-oxobutan-2-amine	experimental	experimental
4439	dbank_004439	-8.1	24768547	DB06994	453.958	453.129	5	C21H25ClFN3O3S	(2S,3S)-3-{3-[2-chloro-4-(methylsulfonyl)phenyl]-1,2,4-oxadiazol-5-yl}-1-cyclopentylidene-4-cyclopropyl-1-fluorobutan-2-amine	experimental	experimental
4440	dbank_004440	-8.1	17748441	DB06995	398.363	398.119	4	C20H16F2N4O3	N-({4-[(2-aminopyridin-4-yl)oxy]-3-fluorophenyl}carbamoyl)-2-(4-fluorophenyl)acetamide	experimental	experimental
4581	dbank_004581	-8.1	10450114	DB07154	343.344	343.151	3	C16H20F3N3O2	(3R)-4-[(3R)-3-AMINO-4-(2,4,5-TRIFLUOROPHENYL)BUTANOYL]-3-METHYL-1,4-DIAZEPAN-2-ONE	experimental	experimental
4611	dbank_004611	-8.1	11963557	DB07186	448.541	448.168	5	C23H24N6O2S	4-(4-METHYLPIPERAZIN-1-YL)-N-[5-(2-THIENYLACETYL)-1,5-DIHYDROPYRROLO[3,4-C]PYRAZOL-3-YL]BENZAMIDE	experimental	experimental
4649	dbank_004649	-8.1	447492	DB07229	357.405	357.148	3	C22H19N3O2	3-{5-[AMINO(IMINIO)METHYL]-1H-INDOL-2-YL}-5-METHOXY-1,1'-BIPHENYL-2-OLATE	experimental	experimental
4680	dbank_004680	-8.1	24808499	DB07263	495.25	494.009	4	C22H18BrF2O4P	[{2-bromo-4-[(2R)-3-oxo-2,3-diphenylpropyl]phenyl}(difluoro)methyl]phosphonic acid	experimental	experimental
4685	dbank_004685	-8.1	6102822	DB07270	464.322	463.016	5	C20H15Cl2N3O4S	N-[7-(3-AMINOPHENYL)-5-METHOXY-1,3-BENZOXAZOL-2-YL]-2,5-DICHLOROBENZENESULFONAMIDE	experimental	experimental
4710	dbank_004710	-8.1	54682555	DB07296	348.779	348.055	2	C21H13ClO3	(5Z)-3-(4-CHLOROPHENYL)-4-HYDROXY-5-(1-NAPHTHYLMETHYLENE)FURAN-2(5H)-ONE	experimental	experimental
4814	dbank_004814	-8.1	42628075	DB07415	386.377	386.139	6	C19H19FN4O4	4-[(1S)-1-(3-fluoro-4-methoxyphenyl)-2-(2-methoxy-5-nitrophenyl)ethyl]-1H-imidazol-2-amine	experimental	experimental
4861	dbank_004861	-8.1	24178121	DB07470	278.305	278.106	4	C17H14N2O2	(3aS)-3a-hydroxy-1-phenyl-1,2,3,3a-tetrahydro-4H-pyrrolo[2,3-b]quinolin-4-one	experimental	experimental
4903	dbank_004903	-8.1	16040323	DB07519	351.442	351.195	4	C21H25N3O2	(6R)-2-amino-6-[2-(3'-methoxybiphenyl-3-yl)ethyl]-3,6-dimethyl-5,6-dihydropyrimidin-4(3H)-one	experimental	experimental
4911	dbank_004911	-8.1	24812719	DB07528	396.365	396.12	4	C21H15F3N4O	3-(2-aminoquinazolin-6-yl)-4-methyl-1-[3-(trifluoromethyl)phenyl]pyridin-2(1H)-one	experimental	experimental
4957	dbank_004957	-8.1	5287977	DB07582	446.583	446.289	4	C24H38N4O4	N-[(2R,3S)-1-((2S)-2-{[(CYCLOPENTYLAMINO)CARBONYL]AMINO}-3-METHYLBUTANOYL)-2-(1-FORMYL-1-CYCLOBUTYL)PYRROLIDINYL]CYCLOPROPANECARBOXAMIDE	experimental	experimental
4969	dbank_004969	-8.1	5327130	DB07595	381.249	380.051	3	C18H15BrN5	(5Z)-5-(3-BROMOCYCLOHEXA-2,5-DIEN-1-YLIDENE)-N-(PYRIDIN-4-YLMETHYL)-1,5-DIHYDROPYRAZOLO[1,5-A]PYRIMIDIN-7-AMINE	experimental	experimental
4975	dbank_004975	-8.1	9547923	DB07605	476.956	476.038	4	C20H17ClN4O4S2	2-({4-[(5-CHLORO-1H-INDOL-2-YL)SULFONYL]PIPERAZIN-1-YL}CARBONYL)THIENO[3,2-B]PYRIDINE 4-OXIDE	experimental	experimental
5071	dbank_005071	-8.1	16750073	DB07717	446.57	446.263	3	C27H36F2O3	(5S,8R,9S,10S,13R,14S,17S)-13-{2-[(3,5-DIFLUOROBENZYL)OXY]ETHYL}-17-HYDROXY-10-METHYLHEXADECAHYDRO-3H-CYCLOPENTA[A]PHENANTHREN-3-ONE	experimental	experimental
5081	dbank_005081	-8.1	6470990	DB07729	283.26	283.087	4	C14H10FN5O	3-fluoro-N-[3-(1H-tetrazol-5-yl)phenyl]benzamide	experimental	experimental
5152	dbank_005152	-8.1	17758361	DB07809	344.41	344.164	5	C21H20N4O	4-({[4-(3-METHYLBENZOYL)PYRIDIN-2-YL]AMINO}METHYL)BENZENECARBOXIMIDAMIDE	experimental	experimental
5265	dbank_005265	-8.1	16744441	DB07937	446.493	446.224	7	C22H28F2N6O2	2-butoxy-9-(2,6-difluorobenzyl)-N-(2-morpholin-4-ylethyl)-9H-purin-6-amine	experimental	experimental
5273	dbank_005273	-8.1	9863791	DB07945	362.422	362.163	3	C22H22N2O3	5-(3-carbamoylbenzyl)-5,6,7,8,9,10-hexahydrocyclohepta[b]indole-4-carboxylic acid	experimental	experimental
5276	dbank_005276	-8.1	11840955	DB07949	335.313	335.091	7	C18H13N3O4	({[(3E)-2'-OXO-2',7'-DIHYDRO-2,3'-BIINDOL-3(7H)-YLIDENE]AMINO}OXY)ACETIC ACID	experimental	experimental
5333	dbank_005333	-8.1	46937116	DB08011	346.285	346.077	5	C17H12F2N2O4	(3E)-5-fluoro-1-[(6-fluoro-4H-1,3-benzodioxin-8-yl)methyl]-1H-indole-2,3-dione 3-oxime	experimental	experimental
5437	dbank_005437	-8.1	5288712	DB08126	357.387	357.09	6	C16H15N5O3S	3-{[4-([amino(imino)methyl]aminosulfonyl)anilino]methylene}-2-oxo-2,3-dihydro-1H-indole	experimental	experimental
5442	dbank_005442	-8.1	446560	DB08131	397.428	397.175	6	C20H23N5O4	2-{4-[2-(2-AMINO-4-OXO-4,7-DIHYDRO-3H-PYRROLO[2,3-D]PYRIMIDIN-5-YL)-ETHYL]-BENZOYLAMINO}-3-METHYL-BUTYRIC ACID	experimental	experimental
5538	dbank_005538	-8.1	6102824	DB08244	354.393	354.154	2	C21H20F2N2O	(1S)-1-CYCLOPROPYL-2-[(2S)-4-(2,5-DIFLUOROPHENYL)-2-PHENYL-2,5-DIHYDRO-1H-PYRROL-1-YL]-2-OXOETHANAMINE	experimental	experimental
5564	dbank_005564	-8.1	135435181	DB08278	427.449	427.1	6	C21H18FN3O4S	1-(2-cyclopropylethyl)-3-(1,1-dioxo-2H-1,2,4-benzothiadiazin-3-yl)-6-fluoro-4-hydroxy-2(1H)-quinolinone	experimental	experimental
5569	dbank_005569	-8.1	25190761	DB08285	354.449	354.217	6	C19H26N6O	(2R)-2-{[4-(benzylamino)-8-(1-methylethyl)pyrazolo[1,5-a][1,3,5]triazin-2-yl]amino}butan-1-ol	experimental	experimental
5586	dbank_005586	-8.1	44129630	DB08304	413.555	413.144	5	C18H27N3O4S2	(3R)-3-cyclopentyl-7-[(4-methylpiperazin-1-yl)sulfonyl]-3,4-dihydro-2H-1,2-benzothiazine 1,1-dioxide	experimental	experimental
5626	dbank_005626	-8.1	24779675	DB08353	347.417	347.186	6	C19H21N7	2-(CYCLOHEXYLMETHYLAMINO)-4-(PHENYLAMINO)PYRAZOLO[1,5-A][1,3,5]TRIAZINE-8-CARBONITRILE	experimental	experimental
5654	dbank_005654	-8.1	11610553	DB08386	378.426	378.148	4	C24H18N4O	2-{[4-(4-pyridin-4-yl-1H-pyrazol-3-yl)phenoxy]methyl}quinoline	experimental	experimental
5681	dbank_005681	-8.1	9912519	DB08418	469.553	469.167	6	C24H27N3O5S	(4aS,4bR,10bS,12aS)-12a-methyl-1,3-dioxo-2-(pyridin-3-ylmethyl)-1,2,3,4,4a,4b,5,6,10b,11,12,12a-dodecahydronaphtho[2,1-f]isoquinolin-8-yl sulfamate	experimental	experimental
5687	dbank_005687	-8.1	445481	DB08426	427.5	427.077	5	C19H17N5O3S2	THIENO[3,2-B]PYRIDINE-2-SULFONIC ACID [2-OXO-1-(1H-PYRROLO[2,3-C]PYRIDIN-2-YLMETHYL)-PYRROLIDIN-3-YL]-AMIDE	experimental	experimental
5689	dbank_005689	-8.1	42608447	DB08429	478.004	477.149	5	C23H28ClN3O4S	N-({(2S)-1-[(3R)-3-amino-4-(3-chlorophenyl)butanoyl]pyrrolidin-2-yl}methyl)-3-(methylsulfonyl)benzamide	experimental	experimental
5707	dbank_005707	-8.1	46937152	DB08448	385.422	385.165	8	C21H19N7O	(4aS)-5-[(2,4-diaminopteridin-6-yl)methyl]-4a,5-dihydro-2H-dibenzo[b,f]azepin-8-ol	experimental	experimental
5708	dbank_005708	-8.1	10150441	DB08449	377.34	377.045	4	C17H10F3N3O2S	2-(3-((4,5,7-trifluorobenzo[d]thiazol-2-yl)methyl)-1H-pyrrolo[2,3-b]pyridin-1-yl)acetic acid	experimental	experimental
5738	dbank_005738	-8.1	447359	DB08487	462.973	462.059	5	C20H19ClN4O3S2	3-({4-[(6-CHLORO-1-BENZOTHIEN-2-YL)SULFONYL]-2-OXOPIPERAZIN-1-YL}METHYL)BENZENECARBOXIMIDAMIDE	experimental	experimental
5745	dbank_005745	-8.1	24878044	DB08494	453.963	453.058	5	C19H20ClN3O4S2	S-{2-[(2-chloro-4-sulfamoylphenyl)amino]-2-oxoethyl} 6-methyl-3,4-dihydroquinoline-1(2H)-carbothioate	experimental	experimental
5805	dbank_005805	-8.1	2742752	DB08560	417.452	417.042	3	C19H13F2N3O2S2	3-FLUORO-N-[1-(4-FLUOROPHENYL)-3-(2-THIENYL)-1H-PYRAZOL-5-YL]BENZENESULFONAMIDE	experimental	experimental
5824	dbank_005824	-8.1	24779724	DB08584	359.408	359.095	5	C18H13N7S	6-{[6-(1-methyl-1H-pyrazol-4-yl)[1,2,4]triazolo[4,3-b]pyridazin-3-yl]sulfanyl}quinoline	experimental	experimental
5828	dbank_005828	-8.1	11987888	DB08590	440.449	440.17	6	C22H24N4O6	1-(3-HYDROXYPROPYL)-2-[(3-NITROBENZOYL)AMINO]-1H-BENZIMIDAZOL-5-YL PIVALATE	experimental	experimental
5930	dbank_005930	-8.1	23586178	DB08710	398.414	398.096	6	C18H15FN6O2S	(5Z)-5-[(5-ethylfuran-2-yl)methylidene]-2-[[(S)-(4-fluorophenyl)-(2H-tetrazol-5-yl)methyl]amino]-1,3-thiazol-4-one	experimental	experimental
6030	dbank_006030	-8.1	11238823	DB08822	568.534	568.159	7	C30H24N4O8	Azilsartan medoxomil	approved; investigational	approved	investigational
6054	dbank_006054	-8.1	5282452	DB08860	421.461	421.169	5	C25H24FNO4	Pitavastatin	approved	approved
6062	dbank_006062	-8.1	25102847	DB08875	501.514	501.17	5	C28H24FN3O5	Cabozantinib	approved; investigational	approved	investigational
6064	dbank_006064	-8.1	169371	DB08878	440.413	440.156	12	C19H20N8O5	Aminopterin	investigational; withdrawn	investigational	withdrawn
6438	dbank_006438	-8.1	5281718	DB11263	390.388	390.131	8	C20H22O8	Polydatin	approved	approved
6519	dbank_006519	-8.1	4823	DB11450	334.379	334.143	4	C19H18N4O2	Pimobendan	vet_approved	vet_approved
6578	dbank_006578	-8.1	6436140	DB11592	516.5	516.041	8	C21H16N4O8S2	Nitrocefin	experimental	experimental
6595	dbank_006595	-8.1	6480466	DB11637	534.492	534.173	8	C25H25F3N4O6	Delamanid	approved; investigational	approved	investigational
6609	dbank_006609	-8.1	11955855	DB11662	436.31	435.091	6	C18H22BrN5O3	Rabusertib	investigational	investigational
6657	dbank_006657	-8.1	10298385	DB11734	462.594	462.263	3	C27H34N4O3	Fedovapagon	investigational	investigational
6659	dbank_006659	-8.1	11465695	DB11736	476.56	476.195	10	C20H28N8O4S	PF-00489791	investigational	investigational
6660	dbank_006660	-8.1	22024915	DB11737	391.427	391.153	7	C22H21N3O4	Icotinib	experimental; investigational	experimental	investigational
6725	dbank_006725	-8.1	44814423	DB11827	436.89	436.129	7	C22H25ClO7	Ertugliflozin	approved; investigational	approved	investigational
6728	dbank_006728	-8.1	9865515	DB11830	396.454	396.17	6	C23H20N6O	Mocetinostat	investigational	investigational
6737	dbank_006737	-8.1	25031915	DB11845	443.503	443.185	5	C26H25N3O4	Lucitanib	investigational	investigational
6739	dbank_006739	-8.1	44242317	DB11847	585.561	585.192	10	C29H29F2N3O8	Cadazolid	investigational	investigational
6749	dbank_006749	-8.1	11154925	DB11865	441.463	441.181	5	C22H24FN5O4	Brivanib alaninate	investigational	investigational
6750	dbank_006750	-8.1	16755766	DB11867	416.389	416.141	7	C19H18F2N6O3	JNJ-39393406	investigational	investigational
6782	dbank_006782	-8.1	10090485	DB11911	369.428	369.159	4	C22H19N5O	Galunisertib	investigational	investigational
6791	dbank_006791	-8.1	71533696	DB11923	447.344	447.092	4	C21H11F6N5	Decoglurant	investigational	investigational
6792	dbank_006792	-8.1	25262792	DB11925	462.554	462.238	8	C25H30N6O3	Vistusertib	investigational	investigational
6795	dbank_006795	-8.1	11634973	DB11934	518.658	518.289	5	C30H38N4O4	Epelsiban	investigational	investigational
6830	dbank_006830	-8.1	11641515	DB11984	479.977	479.128	5	C22H26ClN3O5S	Letaxaban	investigational	investigational
6835	dbank_006835	-8.1	71587773	DB11990	455.566	455.276	5	C24H36F3N3O2	MK-0812	investigational	investigational
6840	dbank_006840	-8.1	9952884	DB11999	401.44	401.116	9	C18H19N5O4S	Vosaroxin	investigational	investigational
6858	dbank_006858	-8.1	25114442	DB12024	409.413	409.133	5	C23H20FNO5	PF-04418948	investigational	investigational
6886	dbank_006886	-8.1	24794418	DB12064	512.893	512.106	7	C25H19ClF2N4O4	BMS-777607	investigational	investigational
6920	dbank_006920	-8.1	25127713	DB12114	491.34	490.097	6	C23H21Cl2FN4O3	Poziotinib	investigational	investigational
6967	dbank_006967	-8.1	11488320	DB12183	473.93	473.163	7	C23H25ClFN5O3	Sapitinib	investigational	investigational
7010	dbank_007010	-8.1	11152667	DB12242	362.422	362.121	3	C17H19FN4O2S	AZD-7762	investigational	investigational
7019	dbank_007019	-8.1	3035714	DB12254	371.41	371.094	6	C18H17N3O4S	ABT-751	investigational	investigational
7041	dbank_007041	-8.1	46832368	DB12284	559.8	559.2	5	C28H37N3O3S3	LY-2608204	investigational	investigational
7114	dbank_007114	-8.1	97226	DB12385	364.357	364.106	5	C20H16N2O5	10-hydroxycamptothecin	investigational	investigational
7148	dbank_007148	-8.1	56649347	DB12428	491.48	491.13	4	C21H22F5N3O3S	PAC-14028	investigational	investigational
7199	dbank_007199	-8.1	90753074	DB12507	496.9	496.133	7	C22H23ClF2N4O5	Atecegatran metoxil	investigational	investigational
7205	dbank_007205	-8.1	72402	DB12515	363.373	363.122	5	C20H17N3O4	9-aminocamptothecin	investigational	investigational
7248	dbank_007248	-8.1	16058752	DB12579	372.343	372.137	4	C17H17F5N4	JNJ-37822681	investigational	investigational
7295	dbank_007295	-8.1	89508529	DB12659	468.412	468.121	4	C24H16F4N4O2	SJ-733	investigational	investigational
7339	dbank_007339	-8.1	59657596	DB12721	437.97	437.187	3	C25H28ClN3O2	RO-5028442	investigational	investigational
7341	dbank_007341	-8.1	11961293	DB12725	455.603	455.29	4	C25H37N5O3	TD-8954	investigational	investigational
7423	dbank_007423	-8.1	9849699	DB12858	524.621	524.242	5	C31H32N4O4	LY-377604	investigational	investigational
7486	dbank_007486	-8.1	71451950	DB12949	433.524	433.238	5	C23H32FN3O4	PF-03382792	investigational	investigational
7491	dbank_007491	-8.1	49871007	DB12960	559.678	559.313	6	C30H40F3N5O2	INCB-9471	investigational	investigational
7525	dbank_007525	-8.1	11611800	DB13016	434.488	434.173	6	C26H26O6	LY-2300559	investigational	investigational
7527	dbank_007527	-8.1	25116064	DB13019	468.529	468.217	5	C25H29FN4O4	Henatinib	investigational	investigational
7548	dbank_007548	-8.1	49784945	DB13051	377.421	377.127	9	C15H19N7O3S	CH-5132799	investigational	investigational
7554	dbank_007554	-8.1	51346455	DB13059	474.488	474.199	6	C23H25F3N6O2	PF-03814735	investigational	investigational
7867	dbank_007867	-8.1	28693	DB13520	403.526	403.226	2	C25H29N3O2	Metergoline	approved	approved
7909	dbank_007909	-8.1	65687	DB13579	323.392	323.152	3	C20H21NO3	Mepixanox	experimental	experimental
8049	dbank_008049	-8.1	3926	DB13766	491.627	491.275	3	C30H35F2N3O	Lidoflazine	approved; experimental	approved	experimental
8059	dbank_008059	-8.1	71736	DB13778	548.43	546.961	8	C18H15Cl2N5O5S3	Cefazedone	experimental	experimental
8125	dbank_008125	-8.1	21022	DB13865	478.633	478.283	6	C29H38N2O4	Dehydroemetine	investigational	investigational
8132	dbank_008132	-8.1	89683805	DB13874	473.383	473.14	8	C19H17F6N7O	Enasidenib	approved; investigational	approved	investigational
8202	dbank_008202	-8.1	60870	DB14034	420.48	420.114	4	C23H20N2O4S	Darglitazone	experimental	experimental
8375	dbank_008375	-8.1	11317439	DB14675	473.493	473.181	7	C24H23N7O4	Temsavir	investigational	investigational
8388	dbank_008388	-8.1	12317881	DB14716	353.77	353.068	5	C17H12ClN5O2	Clonazolam	experimental	experimental
8392	dbank_008392	-8.1	46188928	DB14723	428.444	428.177	5	C21H22F2N6O2	Larotrectinib	approved; investigational	approved	investigational
8394	dbank_008394	-8.1	216210	DB14726	471.521	471.202	8	C25H25N7O3	Dabigatran	investigational	investigational
8421	dbank_008421	-8.1	44539266	DB14787	548.93	548.057	7	C24H22ClN2O7PS	BMS-830216	investigational	investigational
8426	dbank_008426	-8.1	78209992	DB14795	459.91	459.147	6	C22H23ClFN5O3	AZD-3759	investigational	investigational
8434	dbank_008434	-8.1	25195495	DB14822	477.55	477.152	3	C26H24FN3O3S	SB-649868	investigational	investigational
8466	dbank_008466	-8.1	46834118	DB14889	468.576	468.233	5	C29H29FN4O	Derazantinib	investigational	investigational
8503	dbank_008503	-8.1	51039030	DB14993	583.09	582.215	8	C32H31ClN6O3	Pyrotinib	investigational	investigational
8511	dbank_008511	-8.1	71715374	DB15013	519.51	519.086	8	C19H20F3N5O5S2	TAK-243	investigational	investigational
8514	dbank_008514	-8.1	24744336	DB15024	364.39	364.089	4	C17H17FN2O4S	Apararenone	investigational	investigational
8518	dbank_008518	-8.1	91801202	DB15031	450.93	450.157	5	C23H23ClN6O2	Nemorexant	investigational	investigational
8539	dbank_008539	-8.1	56846693	DB15068	517.465	517.157	6	C24H22F3N5O5	Agerafenib	investigational	investigational
8565	dbank_008565	-8.1	56639723	DB15121	421.35	421.046	7	C17H10F3N5O3S	AT-001	investigational	investigational
8568	dbank_008568	-8.1	68109743	DB15124	436.91	436.097	6	C19H21ClN4O4S	PF-05241328	investigational	investigational
8571	dbank_008571	-8.1	44548240	DB15132	513.91	513.133	7	C23H21ClFN7O4	AZD-8165	investigational	investigational
8574	dbank_008574	-8.1	15942005	DB15137	514.98	514.168	3	C28H32ClO5P	VK-2809	investigational	investigational
8590	dbank_008590	-8.1	118029202	DB15169	629.54	628.208	9	C29H34Cl2N8O4	H3B-6527	investigational	investigational
8593	dbank_008593	-8.1	134393443	DB15177	591.65	591.213	7	C28H32F3N5O4S	VX-659	investigational	investigational
8627	dbank_008627	-8.1	90445883	DB15238	509.397	509.123	7	C21H16F5N7O3	Olinciguat	investigational	investigational
8645	dbank_008645	-8.1	71727581	DB15281	440.86	440.116	6	C21H18ClFN6O2	Ravoxertinib	investigational	investigational
8736	dbank_008736	-8.1	16048422	DB15460	476.548	476.211	4	C28H29FN2O4	AGG-523	investigational	investigational
8740	dbank_008740	-8.1	9866696	DB15477	418.398	418.126	9	C21H22O9	Alloin	approved; experimental	approved	experimental
8762	dbank_008762	-8.1	160254	DB15579	296.366	296.141	3	C19H20O3	Cryptotanshinone	experimental	experimental
88	dbank_000088	-8	60164	DB00210	412.52	412.204	3	C28H28O3	Adapalene	approved	approved
149	dbank_000149	-8	92722	DB00278	508.64	508.247	9	C23H36N6O5S	Argatroban	approved; investigational	approved	investigational
174	dbank_000174	-8	82146	DB00307	348.478	348.209	2	C24H28O2	Bexarotene	approved; investigational	approved	investigational
287	dbank_000287	-8	41867	DB00445	543.519	543.174	12	C27H29NO11	Epirubicin	approved	approved
296	dbank_000296	-8	3957	DB00455	382.883	382.145	2	C22H23ClN2O2	Loratadine	approved; investigational	approved	investigational
347	dbank_000347	-8	6957673	DB00522	404.415	404.137	5	C23H20N2O5	Bentiromide	investigational; withdrawn	investigational	withdrawn
370	dbank_000370	-8	5717	DB00549	575.675	575.209	6	C31H33N3O6S	Zafirlukast	approved; investigational	approved	investigational
437	dbank_000437	-8	2809	DB00628	314.723	314.046	4	C16H11ClN2O3	Clorazepic acid	approved; illicit	approved	illicit
455	dbank_000455	-8	6006	DB00650	473.446	473.166	11	C20H23N7O7	Leucovorin	approved	approved
929	dbank_000929	-8	3356	DB01195	414.343	414.138	4	C17H20F6N2O3	Flecainide	approved; withdrawn	approved	withdrawn
932	dbank_000932	-8	5735	DB01198	388.808	388.105	6	C17H17ClN6O3	Zopiclone	approved	approved
977	dbank_000977	-8	3062316	DB01254	488.006	487.156	8	C22H26ClN7O2S	Dasatinib	approved; investigational	approved	investigational
983	dbank_000983	-8	213039	DB01264	547.664	547.235	7	C27H37N3O7S	Darunavir	approved	approved
1007	dbank_001007	-8	43594	DB01328	542.566	542.035	11	C18H18N6O8S3	Cefonicid	approved; investigational	approved	investigational
1204	dbank_001204	-8	33746	DB01587	368.814	368.093	3	C20H17ClN2O3	Ketazolam	approved	approved
1406	dbank_001406	-8	128882	DB01842	507.181	506.996	14	C10H16N5O13P3	3'-Phosphate-Adenosine-5'-Diphosphate	experimental	experimental
1522	dbank_001522	-8	448436	DB02004	405.278	404.081	6	C19H18Cl2N4O2	5-(Aminomethyl)-6-(2,4-Dichlorophenyl)-2-(3,5-Dimethoxyphenyl)Pyrimidin-4-Amine	experimental	experimental
1558	dbank_001558	-8	449500	DB02046	447.421	447.156	5	C21H26N3O6P	N-[(Furan-2-Yl)Carbonyl]-(S)-Leucyl-(R)-[1-Amino-2(1h-Indol-3-Yl)Ethyl]-Phosphonic Acid	experimental	experimental
1586	dbank_001586	-8	17753851	DB02081	376.495	376.226	5	C23H28N4O	Bis-Benzamidine	experimental	experimental
1602	dbank_001602	-8	449157	DB02101	279.224	279.066	4	C12H10FN3O4	(S,R)-fidarestat	experimental	experimental
1673	dbank_001673	-8	5288527	DB02197	366.397	366.09	6	C17H14N6O2S	4-[(4-Imidazo[1,2-a]Pyridin-3-Ylpyrimidin-2-Yl)Amino]Benzenesulfonamide	experimental	experimental
1993	dbank_001993	-8	5287797	DB02595	552.551	552.117	13	C16H30N3O14S2	(2R,3S,5S)-2-(Hydroxymethyl)-5-[(2-sulfoethyl)carbamoyl]-3-pyrrolidiniumyl 2-acetamido-2-deoxy-4-O-sulfo-beta-D-glucopyranoside	experimental	experimental
2056	dbank_002056	-8	5288394	DB02673	529.647	529.27	5	C32H37N2O5	(4aS,6R,8aS)-11-[8-(1,3-Dioxo-1,3-dihydro-2H-isoindol-2-yl)octyl]-6-hydroxy-3-methoxy-5,6,9,10-tetrahydro-4aH-[1]benzofuro[3a,3,2-ef][2]benzazepin-11-ium	experimental	experimental
2108	dbank_002108	-8	2605	DB02741	386.483	386.188	3	C26H26O3	CD564	experimental	experimental
2246	dbank_002246	-8	449096	DB02917	389.449	389.05	5	C17H15N3O4S2	N-Hydroxy-4-(Methyl{[5-(2-Pyridinyl)-2-Thienyl]Sulfonyl}Amino)Benzamide	experimental	experimental
2313	dbank_002313	-8	101360807	DB03005	661.86	661.377	6	C42H45N8	3,8-Diamino-6-Phenyl-5-[6-[1-[2-[(1,2,3,4-Tetrahydro-9-Acridinyl)Amino]Ethyl]-1h-1,2,3-Triazol-5-Yl]Hexyl]-Phenanthridinium	experimental	experimental
2339	dbank_002339	-8	156422	DB03044	527.657	527.29	5	C31H37N5O3	1-(5-Tert-Butyl-2-P-Tolyl-2h-Pyrazol-3-Yl)-3-[4-(2-Morpholin-4-Yl-Ethoxy)-Naphthalen-1-Yl]-Urea	experimental; investigational	experimental	investigational
2426	dbank_002426	-8	447476	DB03159	327.379	327.137	2	C21H17N3O	CRA_8696	experimental	experimental
2468	dbank_002468	-8	2280	DB03213	348.362	348.145	5	C17H16N8O	Bis(5-Amidino-2-Benzimidazolyl)Methane Ketone	experimental	experimental
2560	dbank_002560	-8	49866787	DB03326	556.423	556.143	14	C19H25N8O10P	Deoxycytidylyl-3',5'-guanosine	experimental	experimental
2646	dbank_002646	-8	445579	DB03446	389.399	389.147	7	C20H23NO7	N-Benzyl-3-(alpha-D-galactopyranosyloxy)benzamide	experimental	experimental
2841	dbank_002841	-8	444695	DB03714	430.297	430.074	7	C17H17F2N2O7P	4-Carbamoyl-4-{[6-(Difluoro-Phosphono-Methyl)-Naphthalene-2-Carbonyl]-Amino}-Butyric Acid	experimental	experimental
3076	dbank_003076	-8	5289179	DB04006	377.344	377.098	4	C21H13F2N3O2	[2-Amino-6-(2,6-Difluoro-Benzoyl)-Imidazo[1,2-a]Pyridin-3-Yl]-Phenyl-Methanone	experimental	experimental
3082	dbank_003082	-8	5005498	DB04014	293.277	293.08	3	C16H11N3O3	Alsterpaullone	experimental	experimental
3217	dbank_003217	-8	445840	DB04186	308.334	308.127	3	C17H16N4O2	N'-(Pyrrolidino[2,1-B]Isoindolin-4-On-8-Yl)-N-(Pyridin-2-Yl)Urea	experimental	experimental
3225	dbank_003225	-8	95054	DB04196	312.284	312.097	9	C14H12N6O3	Pteroic Acid	experimental	experimental
3264	dbank_003264	-8	5288593	DB04244	481.607	481.204	5	C26H31N3O4S	(2R)-2-(3-Biphenylyl)-N-{(2R)-2-hydroxy-3-[(2-pyridinylsulfonyl)amino]propyl}-4-methylpentanamide	experimental	experimental
3307	dbank_003307	-8	2384	DB04301	366.377	366.155	6	C17H18N8O2	Bis(5-Amidino-2-Benzimidazolyl)Methane Ketone Hydrate	experimental	experimental
3318	dbank_003318	-8	8977	DB04315	443.2	443.024	12	C10H15N5O11P2	Guanosine-5'-Diphosphate	experimental	experimental
3351	dbank_003351	-8	4472713	DB04357	313.291	313.105	8	C14H13N6O3	Pteric acid	experimental	experimental
3417	dbank_003417	-8	71166	DB04452	372.423	372.17	5	C21H20N6O	Aminoquinuride	experimental	experimental
3575	dbank_003575	-8	5287847	DB04649	440.454	440.213	11	C17H28N8O6	TETRAHEDRAL INTERMEDIATE OF BLASTICIDIN S	experimental	experimental
3601	dbank_003601	-8	4369390	DB04685	472.507	472.18	4	C28H25FN2O4	1-{(2S,5S)-4-FLUORO-5-[(TRITYLOXY)METHYL]TETRAHYDROFURAN-2-YL}PYRIMIDINE-2,4(1H,3H)-DIONE	experimental	experimental
3604	dbank_003604	-8	6102812	DB04689	521.603	521.22	5	C33H31NO5	2-{5-[3-(6-BENZOYL-1-PROPYLNAPHTHALEN-2-YLOXY)PROPOXY]INDOL-1-YL}ETHANOIC ACID	experimental	experimental
3657	dbank_003657	-8	5289110	DB04760	410.417	410.155	4	C22H20F2N4O2	PYRIMIDINE-4,6-DICARBOXYLIC ACID BIS-(4-FLUORO-3-METHYL-BENZYLAMIDE)	experimental	experimental
3681	dbank_003681	-8	5326925	DB04791	382.413	382.164	8	C20H22N4O4	2-O-(4'-AMIDINOPHENYL)-5-O-(3''-AMIDINOPHENYL)-1,4:3,6-DIANHYDRO-D-SORBITOL	experimental	experimental
3683	dbank_003683	-8	5326927	DB04793	382.413	382.164	8	C20H22N4O4	1,4:3,6-Dianhydro-2-O-(3-carbamimidoylphenyl)-5-O-(4-carbamimidoylphenyl)-D-glucitol	experimental	experimental
3694	dbank_003694	-8	6102810	DB04807	449.43	449.099	11	C17H23NO11S	4-NITROPHENYL-(6-S-ALPHA-D-XYLOPYRANOSYL)-BETA-D-GLUCOPYRANOSIDE	experimental	experimental
3731	dbank_003731	-8	9933475	DB04849	450.505	450.207	5	C25H27FN4O3	Cediranib	investigational	investigational
3739	dbank_003739	-8	71301	DB04861	405.435	405.175	5	C22H25F2NO4	Nebivolol	approved; investigational	approved	investigational
3807	dbank_003807	-8	9831652	DB05038	711.66	710.184	8	C34H36Cl2N6O5S	Anatibant	investigational	investigational
3851	dbank_003851	-8	3081361	DB05294	475.354	474.107	6	C22H24BrFN4O2	Vandetanib	approved	approved
3866	dbank_003866	-8	9871074	DB05412	513.004	512.199	4	C27H30ClFN4O3	Talmapimod	investigational	investigational
3867	dbank_003867	-8	6433099	DB05414	456.576	456.241	4	C29H32N2O3	Pipendoxifene	investigational	investigational
3890	dbank_003890	-8	123683	DB05511	510.286	510.051	8	C18H19IN6O4	Piclidenoson	investigational	investigational
3958	dbank_003958	-8	9868037	DB05913	443.44	443.092	4	C22H16F3N3O2S	OSI-930	investigational	investigational
4023	dbank_004023	-8	216416	DB06202	413.551	413.235	3	C28H31NO2	Lasofoxifene	approved; investigational	approved	investigational
4081	dbank_004081	-8	44473151	DB06346	637.84	637.297	6	C38H43N3O4S	Fiboflapon	investigational	investigational
4093	dbank_004093	-8	159326	DB06395	378.49	378.151	4	C21H22N4OS	Abafungin	investigational	investigational
4117	dbank_004117	-8	6918388	DB06454	348.421	348.164	3	C22H21FN2O	Sarizotan	investigational	investigational
4127	dbank_004127	-8	66000	DB06472	367.405	367.153	6	C20H21N3O4	Fradafiban	investigational	investigational
4136	dbank_004136	-8	3001322	DB06497	577.722	577.315	6	C33H43N3O6	Aplaviroc	investigational	investigational
4170	dbank_004170	-8	9852981	DB06590	684.67	684.01	13	C22H21N8O8PS4	Ceftaroline fosamil	approved; investigational	approved	investigational
4177	dbank_004177	-8	10182969	DB06605	459.497	459.191	5	C25H25N5O4	Apixaban	approved	approved
4194	dbank_004194	-8	5496659	DB06635	446.498	446.195	5	C25H26N4O4	Otamixaban	investigational	investigational
4237	dbank_004237	-8	219090	DB06717	614.407	614.117	9	C23H22F7N4O6P	Fosaprepitant	approved	approved
4315	dbank_004315	-8	23629654	DB06845	371.477	371.232	5	C20H29N5O2	(S)-N-(4-carbamimidoylbenzyl)-1-(2-(cyclopentylamino)ethanoyl)pyrrolidine-2-carboxamide	experimental	experimental
4330	dbank_004330	-8	448123	DB06865	382.453	382.189	6	C22H26N2O4	6-CARBAMIMIDOYL-2-[2-HYDROXY-6-(4-HYDROXY-PHENYL)-INDAN-1-YL]-HEXANOIC ACID	experimental	experimental
4342	dbank_004342	-8	46937031	DB06879	412.436	412.182	6	C21H22F2N6O	5-(4'-AMINO-1'-ETHYL-5',8'-DIFLUORO-1'H-SPIRO[PIPERIDINE-4,2'-QUINAZOLINE]-1-YLCARBONYL)PICOLINONITRILE	experimental	experimental
4352	dbank_004352	-8	6458152	DB06889	288.328	288.079	5	C12H12N6OS	3-(1H-tetrazol-5-ylmethyl)-5,6,7,8-tetrahydro[1]benzothieno[2,3-d]pyrimidin-4(3H)-one	experimental	experimental
4408	dbank_004408	-8	5287467	DB06953	474.341	473.081	5	C25H17Cl2N5O	2-CHLORO-5-(3-CHLORO-PHENYL)-6-[(4-CYANO-PHENYL)-(3-METHYL-3H-IMIDAZOL-4-YL)- METHOXYMETHYL]-NICOTINONITRILE	experimental	experimental
4464	dbank_004464	-8	11304895	DB07022	427.474	427.12	6	C21H21N3O5S	3-Hydroxypropyl 3-[(7-carbamimidoyl-1-naphthyl)carbamoyl]benzenesulfonate	experimental	experimental
4557	dbank_004557	-8	4566	DB07126	402.471	402.147	7	C18H22N6O3S	O6-CYCLOHEXYLMETHOXY-2-(4'-SULPHAMOYLANILINO) PURINE	experimental	experimental
4573	dbank_004573	-8	44144380	DB07144	386.489	386.211	5	C24H26N4O	5-[(3R)-3-(5-methoxy-2',6'-dimethylbiphenyl-3-yl)but-1-yn-1-yl]-6-methylpyrimidine-2,4-diamine	experimental	experimental
4590	dbank_004590	-8	447766	DB07163	310.326	310.123	3	C17H15FN4O	5-[(2-AMINOETHYL)AMINO]-6-FLUORO-3-(1H-PYRROL-2-YL)BENZO[CD]INDOL-2(1H)-ONE	experimental	experimental
4618	dbank_004618	-8	25113172	DB07194	397.494	397.157	6	C20H23N5O2S	2-{2-[(3,5-dimethylphenyl)amino]pyrimidin-4-yl}-N-[(1S)-2-hydroxy-1-methylethyl]-4-methyl-1,3-thiazole-5-carboxamide	experimental	experimental
4626	dbank_004626	-8	4565	DB07203	357.837	357.136	5	C18H20ClN5O	6-CYCLOHEXYLMETHOXY-2-(3'-CHLOROANILINO) PURINE	experimental	experimental
4663	dbank_004663	-8	16129579	DB07246	404.361	404.065	5	C16H15F3N2O5S	(2R)-2-AMINO-3,3,3-TRIFLUORO-N-HYDROXY-2-{[(4-PHENOXYPHENYL)SULFONYL]METHYL}PROPANAMIDE	experimental	experimental
4746	dbank_004746	-8	4369497	DB07334	435.496	435.125	6	C23H21N3O4S	N-[5-(ETHYLSULFONYL)-2-METHOXYPHENYL]-5-[3-(2-PYRIDINYL)PHENYL]-1,3-OXAZOL-2-AMINE	experimental	experimental
4748	dbank_004748	-8	448533	DB07337	375.814	375.1	6	C19H14ClN7	4-[4-AMINO-6-(5-CHLORO-1H-INDOL-4-YLMETHYL)-[1,3,5]TRIAZIN-2-YLAMINO]-BENZONITRILE	experimental	experimental
4810	dbank_004810	-8	16122554	DB07409	434.316	434.068	7	C20H20O7P2	(1-HYDROXY-1-PHOSPHONO-2-[1,1';4',1'']TERPHENYL-3-YL-ETHYL)-PHOSPHONIC ACID	experimental	experimental
4874	dbank_004874	-8	11712628	DB07486	476.435	476.099	3	C21H18F6N2O2S	3-({4-[(1E)-3-morpholin-4-yl-3-oxoprop-1-en-1-yl]-2,3-bis(trifluoromethyl)phenyl}sulfanyl)aniline	experimental	experimental
4914	dbank_004914	-8	5828196	DB07531	350.37	350.003	4	C14H10N2O5S2	4-{5-[(Z)-(2,4-DIOXO-1,3-THIAZOLIDIN-5-YLIDENE)METHYL]FURAN-2-YL}BENZENESULFONAMIDE	experimental	experimental
4946	dbank_004946	-8	16214776	DB07568	425.484	425.062	6	C19H15N5O3S2	(2S)-2-[(2,1,3-BENZOTHIADIAZOL-4-YLSULFONYL)AMINO]-2-PHENYL-N-PYRIDIN-4-YLACETAMIDE	experimental	experimental
4981	dbank_004981	-8	5288016	DB07612	360.376	360.156	4	C19H19F3N4	6-(3-AMINOPHENYL)-N-(TERT-BUTYL)-2-(TRIFLUOROMETHYL)QUINAZOLIN-4-AMINE	experimental	experimental
4997	dbank_004997	-8	24752832	DB07629	472.003	471.15	4	C23H26ClN5O2S	N-((1R,2S)-2-(5-CHLORO-1H-INDOLE-2-CARBOXAMIDO)CYCLOHEXYL)-5-METHYL-4,5,6,7-TETRAHYDROTHIAZOLO[5,4-C]PYRIDINE-2-CARBOXAMIDE	experimental	experimental
4998	dbank_004998	-8	24752833	DB07630	472.003	471.15	4	C23H26ClN5O2S	N-((1R,2R)-2-(5-CHLORO-1H-INDOLE-2-CARBOXAMIDO)CYCLOHEXYL)-5-METHYL-4,5,6,7-TETRAHYDROTHIAZOLO[5,4-C]PYRIDINE-2-CARBOXAMIDE	experimental	experimental
5038	dbank_005038	-8	42627296	DB07678	326.472	326.225	2	C22H30O2	(9ALPHA,13BETA,17BETA)-2-[(1Z)-BUT-1-EN-1-YL]ESTRA-1,3,5(10)-TRIENE-3,17-DIOL	experimental	experimental
5055	dbank_005055	-8	6419789	DB07698	335.79	335.094	4	C18H14ClN5	3-(3-aminophenyl)-N-(3-chlorophenyl)pyrazolo[1,5-a]pyrimidin-5-amine	experimental	experimental
5104	dbank_005104	-8	1723	DB07756	426.428	426.103	4	C20H18F4N2O2S	1-[3-({[(4-AMINO-5-FLUORO-2-METHYLQUINOLIN-3-YL)METHYL]THIO}METHYL)PHENYL]-2,2,2-TRIFLUOROETHANE-1,1-DIOL	experimental	experimental
5113	dbank_005113	-8	23629645	DB07765	450.494	450.213	9	C22H26N8O3	METHYL 1-(4-{[(2,4-DIAMINOPTERIDIN-6-YL)METHYL](METHYL)AMINO}BENZOYL)PIPERIDINE-4-CARBOXYLATE	experimental	experimental
5117	dbank_005117	-8	9543495	DB07770	391.436	391.035	4	C18H14FNO4S2	5-(4-FLUOROPHENYL)-3-{[(4-METHYLPHENYL)SULFONYL]AMINO}THIOPHENE-2-CARBOXYLIC ACID	experimental	experimental
5140	dbank_005140	-8	5288257	DB07796	407.461	407.188	4	C23H24FN4O2	(3ASR,4RS,8ASR,8BRS)-4-(2-(4-FLUOROBENZYL)-1,3-DIOXODEACAHYDROPYRROLO[3,4-A] PYRROLIZIN-4-YL)BENZAMIDINE	experimental	experimental
5264	dbank_005264	-8	16113377	DB07936	451.54	451.25	6	C24H30FN7O	N-(4-{[(3S)-3-(dimethylamino)pyrrolidin-1-yl]carbonyl}phenyl)-5-fluoro-4-[2-methyl-1-(1-methylethyl)-1H-imidazol-5-yl]pyrimidin-2-amine	experimental	experimental
5300	dbank_005300	-8	6540268	DB07974	452.976	452.198	3	C25H29ClN4O2	1-{2-[(4-CHLOROPHENYL)AMINO]-2-OXOETHYL}-N-(1-ISOPROPYLPIPERIDIN-4-YL)-1H-INDOLE-2-CARBOXAMIDE	experimental	experimental
5304	dbank_005304	-8	46937112	DB07978	461.286	461.05	4	C20H10F7NO4	2-({[2,3,5,6-TETRAFLUORO-3'-(TRIFLUOROMETHOXY)BIPHENYL-4-YL]AMINO}CARBONYL)CYCLOPENTA-1,3-DIENE-1-CARBOXYLIC ACID	experimental	experimental
5345	dbank_005345	-8	24801862	DB08023	307.393	307.18	4	C18H21N5	N-cyclohexyl-4-imidazo[1,2-a]pyridin-3-yl-N-methylpyrimidin-2-amine	experimental	experimental
5370	dbank_005370	-8	24905142	DB08052	319.364	319.155	5	C17H17N7	1-cyclopentyl-3-(1H-pyrrolo[2,3-b]pyridin-5-yl)-1H-pyrazolo[3,4-d]pyrimidin-4-amine	experimental	experimental
5395	dbank_005395	-8	6436219	DB08080	395.513	395.177	4	C20H29NO5S	LATRUNCULIN B	experimental	experimental
5409	dbank_005409	-8	9543517	DB08097	399.369	399.131	4	C20H16F3N5O	2-(2,6-DIFLUOROPHENOXY)-N-(2-FLUOROPHENYL)-9-ISOPROPYL-9H-PURIN-8-AMINE	experimental	experimental
5453	dbank_005453	-8	42628063	DB08143	492.926	492.083	4	C22H19ClF2N4O3S	5-CHLORO-THIOPHENE-2-CARBOXYLIC ACID ((3S,4S)-4-FLUORO- 1-{[2-FLUORO-4-(2-OXO-2H-PYRIDIN-1-YL)-PHENYLCARBAMOYL]-METHYL}-PYRROLIDIN-3-YL)-AMIDE	experimental	experimental
5456	dbank_005456	-8	46937128	DB08146	289.334	289.133	5	C17H15N5	7-(2,5-dihydropyrrol-1-yl)-6-phenyl-pyrido[6,5-d]pyrimidin-2-amine	experimental	experimental
5469	dbank_005469	-8	5288720	DB08159	333.337	333.1	4	C20H15NO4	4-(5,11-DIOXO-5H-INDENO[1,2-C]ISOQUINOLIN-6(11H)-YL)BUTANOATE	experimental	experimental
5585	dbank_005585	-8	44129629	DB08303	428.569	428.155	6	C18H28N4O4S2	(3S)-3-cyclopentyl-6-methyl-7-[(4-methylpiperazin-1-yl)sulfonyl]-3,4-dihydro-2H-1,2,4-benzothiadiazine 1,1-dioxide	experimental	experimental
5651	dbank_005651	-8	1122713	DB08383	362.445	362.109	3	C21H18N2O2S	4,5-bis(4-methoxyphenyl)-2-thiophen-2-yl-1H-imidazole	experimental	experimental
5659	dbank_005659	-8	11955614	DB08391	403.434	403.164	8	C22H21N5O3	6,7-DIMETHOXY-4-[(3R)-3-(QUINOXALIN-2-YLOXY)PYRROLIDIN-1-YL]QUINAZOLINE	experimental	experimental
5740	dbank_005740	-8	478379	DB08489	456.578	456.274	4	C25H36N4O4	N4-HYDROXY-2-ISOBUTYL-N1-(9-OXO-1,8-DIAZA-TRICYCLO[10.6.1.013,18]NONADECA-12(19),13,15,17-TETRAEN-10-YL)-SUCCINAMIDE	experimental	experimental
5780	dbank_005780	-8	46937158	DB08532	319.336	319.123	4	C18H14FN5	6-(2-fluorophenyl)-N-(pyridin-3-ylmethyl)imidazo[1,2-a]pyrazin-8-amine	experimental	experimental
5801	dbank_005801	-8	9543496	DB08556	435.537	435.027	5	C19H17NO5S3	5'-ACETYL-4-{[(2,4-DIMETHYLPHENYL)SULFONYL]AMINO}-2,2'-BITHIOPHENE-5-CARBOXYLIC ACID	experimental	experimental
5949	dbank_005949	-8	5326869	DB08730	444.501	444.196	4	C26H25FN4O2	3-FLUORO-5-MORPHOLIN-4-YL-N-[1-(2-PYRIDIN-4-YLETHYL)-1H-INDOL-6-YL]BENZAMIDE	experimental	experimental
5974	dbank_005974	-8	46937176	DB08755	456.578	456.274	5	C25H36N4O4	N-[(1S)-2-{[(1R)-2-(benzyloxy)-1-cyano-1-methylethyl]amino}-1-(cyclohexylmethyl)-2-oxoethyl]morpholine-4-carboxamide	experimental	experimental
6057	dbank_006057	-8	11626560	DB08865	450.337	449.119	5	C21H22Cl2FN5O	Crizotinib	approved	approved
6094	dbank_006094	-8	11304743	DB08931	422.416	422.162	8	C20H19FN8O2	Riociguat	approved	approved
6097	dbank_006097	-8	45375808	DB08934	529.458	529.163	6	C22H29FN3O9P	Sofosbuvir	approved	approved
6178	dbank_006178	-8	24965990	DB09034	450.93	450.157	5	C23H23ClN6O2	Suvorexant	approved; investigational	approved	investigational
6199	dbank_006199	-8	5330286	DB09073	447.533	447.238	8	C24H29N7O2	Palbociclib	approved; investigational	approved	investigational
6243	dbank_006243	-8	3307	DB09166	342.846	342.071	3	C17H15ClN4S	Etizolam	experimental	experimental
6290	dbank_006290	-8	65679	DB09215	357.34	357.042	5	C16H11N3O5S	Droxicam	withdrawn	withdrawn
6538	dbank_006538	-8	16752	DB11487	497.563	497.221	6	C28H32FNO6	Dexamethasone isonicotinate	vet_approved	vet_approved
6553	dbank_006553	-8	21389	DB11521	348.41	348.17	5	C19H20N6O	Imidocarb	vet_approved	vet_approved
6577	dbank_006577	-8	185460	DB11591	463.622	463.283	5	C28H37N3O3	Bilastine	approved; investigational	approved	investigational
6581	dbank_006581	-8	149436	DB11596	473.439	473.166	12	C20H23N7O7	Levoleucovorin	approved; investigational	approved	investigational
6700	dbank_006700	-8	24958200	DB11793	320.396	320.164	3	C19H20N4O	Niraparib	approved; investigational	approved	investigational
6762	dbank_006762	-8	25017411	DB11885	407.445	407.165	4	C23H22FN3O3	Anlotinib	investigational	investigational
6808	dbank_006808	-8	9832383	DB11949	491.454	491.181	2	C23H24F7N3O	Vestipitant	investigational	investigational
6811	dbank_006811	-8	50905713	DB11952	416.87	416.115	5	C22H17ClN6O	Duvelisib	approved; investigational	approved	investigational
6818	dbank_006818	-8	11511120	DB11963	469.939	469.168	6	C24H25ClFN5O2	Dacomitinib	approved; investigational	approved	investigational
6836	dbank_006836	-8	46209133	DB11992	398.43	398.122	6	C17H20F2N4O3S	Omarigliptin	investigational	investigational
6850	dbank_006850	-8	11671467	DB12010	580.46	580.148	13	C23H26FN6O9P	Fostamatinib	approved; investigational	approved	investigational
6853	dbank_006853	-8	56649450	DB12015	441.47	441.145	4	C19H22F3N5O2S	Alpelisib	approved; investigational	approved	investigational
6888	dbank_006888	-8	9812416	DB12068	411.3	411.031	4	C14H10F5N3O4S	T-900607	investigational	investigational
6906	dbank_006906	-8	52934180	DB12096	405.502	405.216	4	C23H27N5O2	PF-05175157	investigational	investigational
7007	dbank_007007	-8	9908684	DB12238	395.442	395.187	6	C20H22FN7O	MK-0777	investigational	investigational
7027	dbank_007027	-8	68165256	DB12267	584.1	583.259	9	C29H39ClN7O2P	Brigatinib	approved; investigational	approved	investigational
7047	dbank_007047	-8	5281807	DB12290	416.378	416.111	9	C21H20O9	Puerarin	investigational	investigational
7060	dbank_007060	-8	42642645	DB12307	632.654	632.245	7	C34H34F2N4O6	Foretinib	investigational	investigational
7092	dbank_007092	-8	9870520	DB12355	498.587	498.238	6	C28H30N6O3	Netazepide	investigational	investigational
7121	dbank_007121	-8	71183216	DB12394	415.372	415.114	5	C21H16F3N3O3	Eleclazine	investigational	investigational
7184	dbank_007184	-8	54556623	DB12479	401.398	401.15	9	C19H20FN5O4	Zabofloxacin	investigational	investigational
7203	dbank_007203	-8	11596613	DB12512	406.49	406.212	6	C22H26N6O2	Verucerfont	investigational	investigational
7227	dbank_007227	-8	49848070	DB12550	512.502	512.195	5	C26H24F4N6O	Taladegib	investigational	investigational
7294	dbank_007294	-8	10407120	DB12658	375.428	375.158	3	C22H21N3O3	AFN-1252	investigational	investigational
7300	dbank_007300	-8	5280804	DB12665	464.376	464.095	12	C21H20O12	Isoquercetin	investigational	investigational
7319	dbank_007319	-8	5074	DB12693	477.57	477.169	3	C27H25F2N3OS	Ritanserin	investigational	investigational
7320	dbank_007320	-8	52949124	DB12694	594.719	594.274	4	C37H34N6O2	CE-326597	investigational	investigational
7350	dbank_007350	-8	58298318	DB12740	336.359	336.145	7	C16H16N8O	CC-115	investigational	investigational
7394	dbank_007394	-8	11518241	DB12808	459.586	459.241	5	C29H33NO4	Trifarotene	approved; investigational	approved	investigational
7419	dbank_007419	-8	56931136	DB12854	462.89	462.109	5	C24H19ClN4O4	BMS-908662	investigational	investigational
7427	dbank_007427	-8	65954	DB12868	348.45	348.195	4	C21H24N4O	Intoplicine	investigational	investigational
7444	dbank_007444	-8	5311070	DB12890	267.328	267.126	3	C17H17NO2	Dihydrexidine	investigational	investigational
7445	dbank_007445	-8	23730143	DB12892	631.737	631.291	6	C36H37N7O4	MGB-BP-3	investigational	investigational
7458	dbank_007458	-8	11223423	DB12910	404.474	404.196	5	C22H24N6O2	Emicerfont	investigational	investigational
7466	dbank_007466	-8	9863827	DB12924	363.417	363.158	6	C21H21N3O3	Ozenoxacin	approved; investigational	approved	investigational
7574	dbank_007574	-8	9893171	DB13088	528.99	528.189	10	C25H29ClN6O5	AZD-0424	investigational	investigational
7584	dbank_007584	-8	15985904	DB13101	447.51	447.137	5	C23H21N5O3S	4SC-202	investigational	investigational
7586	dbank_007586	-8	56960447	DB13104	547.41	546.135	7	C25H25Cl2FN6O3	X-396	investigational	investigational
7607	dbank_007607	-8	56848985	DB13138	716.27	715.18	9	C35H34ClN7O4S2	Neladenoson bialanate	investigational	investigational
7694	dbank_007694	-8	4822	DB13292	293.43	293.124	1	C19H19NS	Pimethixene	approved	approved
7852	dbank_007852	-8	57514697	DB13499	532.54	532.072	8	C22H20N4O8S2	Cefsulodin	experimental	experimental
8288	dbank_008288	-8	25025298	DB14218	546.94	546.139	8	C25H22ClF3N6O3	Telotristat	experimental	experimental
8320	dbank_008320	-8	78320408	DB14581	518.581	518.25	4	C27H33F3N4O3	CPI-1205	investigational	investigational
8389	dbank_008389	-8	20317278	DB14717	319.324	319.107	5	C17H13N5O2	Nitrazolam	experimental	experimental
8410	dbank_008410	-8	11315474	DB14765	397.482	397.19	5	C24H23N5O	Rivoceranib	investigational	investigational
8413	dbank_008413	-8	135565554	DB14769	298.321	298.123	3	C16H15FN4O	Pamiparib	investigational	investigational
8422	dbank_008422	-8	77461017	DB14790	406.79	406.081	4	C19H14ClF3N4O	BPN-14770	investigational	investigational
8428	dbank_008428	-8	68677842	DB14801	434.91	434.016	5	C19H15ClN2O4S2	Lanifibranor	investigational	investigational
8431	dbank_008431	-8	16039797	DB14810	478.509	478.196	8	C24H26N6O5	AZD-1656	investigational	investigational
8468	dbank_008468	-8	44472635	DB14895	444.535	444.216	5	C26H28N4O3	Vibegron	investigational	investigational
8481	dbank_008481	-8	135565042	DB14918	393.491	393.216	6	C22H27N5O2	Branaplam	investigational	investigational
8490	dbank_008490	-8	73051869	DB14937	521.63	521.187	7	C29H31NO6S	MK-8666	investigational	investigational
8521	dbank_008521	-8	135565884	DB15035	471.561	471.227	4	C27H29N5O3	Zanubrutinib	approved; investigational	approved	investigational
8587	dbank_008587	-8	59534142	DB15163	618.628	618.257	10	C28H39N6O8P	Selatogrel	investigational	investigational
8599	dbank_008599	-8	126495573	DB15191	438.53	438.164	6	C22H23FN6OS	MAX-40279	investigational	investigational
8600	dbank_008600	-8	24743471	DB15192	372.472	372.195	4	C23H24N4O	ABT-288	investigational	investigational
8618	dbank_008618	-8	54759694	DB15222	644.622	644.236	12	C29H37N6O9P	GS-6620	investigational	investigational
8620	dbank_008620	-8	54755438	DB15227	454.49	454.175	5	C25H22N6O3	Tirabrutinib	investigational	investigational
8652	dbank_008652	-8	135565465	DB15292	421.52	421.146	6	C23H23N3O3S	Foliglurax	investigational	investigational
8686	dbank_008686	-8	11215055	DB15356	556.659	556.257	6	C33H36N2O6	SLV-334	investigational	investigational
8708	dbank_008708	-8	11618268	DB15407	401.405	401.14	6	C21H16FN7O	Acalisib	investigational	investigational
8720	dbank_008720	-8	89808643	DB15431	449.86	449.123	5	C21H19ClF3N5O	M-2698	investigational	investigational
95	dbank_000095	-7.9	152946	DB00218	401.431	401.175	7	C21H24FN3O4	Moxifloxacin	approved; investigational	approved	investigational
147	dbank_000147	-7.9	2179	DB00276	393.459	393.115	5	C21H19N3O3S	Amsacrine	approved; investigational	approved	investigational
380	dbank_000380	-7.9	104865	DB00559	551.614	551.184	9	C27H29N5O6S	Bosentan	approved; investigational	approved	investigational
449	dbank_000449	-7.9	446556	DB00642	427.411	427.149	9	C20H21N5O6	Pemetrexed	approved; investigational	approved	investigational
556	dbank_000556	-7.9	84088	DB00769	475.618	475.293	6	C27H41NO6	Hydrocortamate	approved	approved
690	dbank_000690	-7.9	644073	DB00921	467.64	467.304	5	C29H41NO4	Buprenorphine	approved; illicit; investigational; vet_approved	approved	illicit	investigational	vet_approved
700	dbank_000700	-7.9	4078	DB00933	386.574	386.149	3	C21H26N2OS2	Mesoridazine	approved; investigational	approved	investigational
707	dbank_000707	-7.9	3601	DB00941	502.745	502.334	0	C36H42N2	Hexafluronium	approved	approved
749	dbank_000749	-7.9	4614	DB00991	293.317	293.105	3	C18H15NO3	Oxaprozin	approved	approved
783	dbank_000783	-7.9	60700	DB01030	421.446	421.164	6	C23H23N3O5	Topotecan	approved; investigational	approved	investigational
810	dbank_000810	-7.9	6479523	DB01061	461.492	461.137	6	C20H23N5O6S	Azlocillin	approved	approved
876	dbank_000876	-7.9	6956357	DB01137	361.368	361.144	7	C18H20FN3O4	Levofloxacin	approved; investigational	approved	investigational
901	dbank_000901	-7.9	2754	DB01166	369.461	369.216	5	C20H27N5O2	Cilostazol	approved; investigational	approved	investigational
914	dbank_000914	-7.9	32681	DB01180	634.716	634.289	8	C35H42N2O9	Rescinnamine	approved	approved
944	dbank_000944	-7.9	5479530	DB01212	554.58	554.046	12	C18H18N8O7S3	Ceftriaxone	approved	approved
1008	dbank_001008	-7.9	44187	DB01329	645.67	645.142	11	C25H27N9O8S2	Cefoperazone	approved; investigational	approved	investigational
1138	dbank_001138	-7.9	14708	DB01514	330.464	330.231	3	C20H30N2O2	Furazabol	illicit	illicit
1242	dbank_001242	-7.9	445968	DB01633	506.428	506.165	15	C18H31FO15	Deoxy-2-fluoro-beta-D-cellotrioside	experimental; investigational	experimental	investigational
1343	dbank_001343	-7.9	447682	DB01765	292.289	292.085	3	C17H12N2O3	(5-Oxo-5,6-Dihydro-Indolo[1,2-a]Quinazolin-7-Yl)-Acetic Acid	experimental	experimental
1346	dbank_001346	-7.9	448470	DB01768	467.423	467.143	10	C21H25NO11	Methylumbelliferyl sialic acid	experimental	experimental
1499	dbank_001499	-7.9	6804	DB01972	363.221	363.058	10	C10H14N5O8P	Guanosine-5'-Monophosphate	experimental	experimental
1502	dbank_001502	-7.9	446724	DB01975	557.343	557.092	15	C16H25N5O13P2	AMPCPR	experimental	experimental
1538	dbank_001538	-7.9	447903	DB02023	363.221	363.058	11	C10H14N5O8P	8-oxo-dGMP	experimental	experimental
1545	dbank_001545	-7.9	5289465	DB02031	445.429	445.171	11	C19H23N7O6	(6S)-5,6,7,8-tetrahydrofolic acid	experimental	experimental
1624	dbank_001624	-7.9	5289091	DB02128	475.536	475.211	5	C27H29N3O5	[1-(3-hydroxy-2-oxo-1-phenethyl-propylcarbamoyl)2-phenyl-ethyl]-carbamic acid pyridin-4-ylmethyl ester	experimental	experimental
1765	dbank_001765	-7.9	24316	DB02315	345.205	345.047	8	C10H12N5O7P	Cyclic GMP	experimental	experimental
1768	dbank_001768	-7.9	447659	DB02319	779.436	779.097	20	C21H32N7O19P3	5,6-dihydroxy-NADP	experimental	experimental
1787	dbank_001787	-7.9	46936357	DB02341	632.619	632.263	6	C29H37F5N4O6	Mdl 101,146	experimental	experimental
1903	dbank_001903	-7.9	448209	DB02485	614.451	614.147	16	C20H31N4O16P	Cytidine-5'-Monophosphate-5-N-Acetylneuraminic Acid	experimental	experimental
1976	dbank_001976	-7.9	448286	DB02573	540.424	540.148	13	C19H25N8O9P	2'-deoxycytidine-2'-deoxyadenosine-3',5'-monophosphate	experimental	experimental
2069	dbank_002069	-7.9	5460316	DB02691	464.624	464.302	6	C26H42NO6	Glycocholic acid	experimental; investigational	experimental	investigational
2173	dbank_002173	-7.9	446871	DB02827	466.442	466.014	9	C18H14N2O9S2	7-(1,1-Dioxo-1h-Benzo[D]Isothiazol-3-Yloxymethyl)-2-(Oxalyl-Amino)-4,7-Dihydro-5h-Thieno[2,3-C]Pyran-3-Carboxylic Acid	experimental	experimental
2235	dbank_002235	-7.9	10214	DB02902	507.264	506.986	14	C10H15N5O13P2S	3'-Phosphate-Adenosine-5'-Phosphate Sulfate	experimental	experimental
2293	dbank_002293	-7.9	445795	DB02976	568.293	568.051	13	C15H23FN2O16P2	Uridine-5'-diphosphate-2-deoxy-2-fluorogalactose	experimental	experimental
2360	dbank_002360	-7.9	448889	DB03072	377.455	377.19	3	C23H24FN3O	2-{3-[4-(4-Fluorophenyl)-3,6-Dihydro-1(2h)-Pyridinyl]Propyl}-8-Methyl-4(3h)-Quinazolinone	experimental	experimental
2422	dbank_002422	-7.9	446662	DB03154	388.145	387.989	6	C12H10F4O6P2	{[7-(Difluoro-Phosphono-Methyl)-Naphthalen-2-Yl]-Difluoro-Methyl}-Phosphonic Acid	experimental	experimental
2614	dbank_002614	-7.9	445675	DB03397	607.354	607.082	14	C17H27N3O17P2	Uridine-Diphosphate-N-Acetylglucosamine	experimental	experimental
2670	dbank_002670	-7.9	448841	DB03476	286.37	286.147	2	C20H18N2	Trans-6-(2-Phenylcyclopropyl)-Naphthalene-2-Carboxamidine	experimental	experimental
2717	dbank_002717	-7.9	443388	DB03541	477.469	477.165	10	C24H23N5O6	10-Propargyl-5,8-Dideazafolic Acid	experimental	experimental
2831	dbank_002831	-7.9	3455	DB03701	450.574	450.248	3	C28H32F2N2O	Vanoxerine	investigational	investigational
2840	dbank_002840	-7.9	447524	DB03712	585.647	585.248	7	C33H35N3O7	RU85053	experimental	experimental
3030	dbank_003030	-7.9	446286	DB03944	425.501	425.141	5	C22H23N3O4S	5-[1-(3,4-Dimethoxy-Benzoyl)-1,2,3,4-Tetrahydro-Quinolin-6-Yl]-6-Methyl-3,6-Dihydro-[1,3,4]Thiadiazin-2-One	experimental	experimental
3034	dbank_003034	-7.9	5289470	DB03949	492.587	492.172	5	C27H28N2O5S	N-[(2S)-3-Phenyl-2-sulfanylpropanoyl]-L-phenylalanyl-L-tyrosine	experimental	experimental
3058	dbank_003058	-7.9	5287870	DB03984	455.57	455.188	4	C24H29N3O4S	Morpholine-4-Carboxylic Acid [1-(2-Benzylsulfanyl-1-Formyl-Ethylcarbamoyl)-2-Phenyl-Ethyl]-Amide	experimental	experimental
3079	dbank_003079	-7.9	448202	DB04011	451.566	451.248	5	C27H29N7	2'-(4-Dimethylaminophenyl)-5-(4-Methyl-1-Piperazinyl)-2,5'-Bi-Benzimidazole	experimental	experimental
3105	dbank_003105	-7.9	151434	DB04047	353.123	352.993	10	C7H9N5O8P2	[Pterin-6-Yl Methanyl]-Phosphonophosphate	experimental	experimental
3119	dbank_003119	-7.9	5289026	DB04064	378.332	378.074	6	C21H14O7	Nogalaviketone	experimental	experimental
3148	dbank_003148	-7.9	165491	DB04099	665.418	665.101	16	C21H27N6O15P2	Deamido-Nad+	experimental	experimental
3385	dbank_003385	-7.9	447960	DB04407	313.378	313.1	6	C15H15N5OS	4-[4-(4-Methyl-2-Methylamino-Thiazol-5-Yl)-Pyrimidin-2-Ylamino]-Phenol	experimental	experimental
3410	dbank_003410	-7.9	1509	DB04442	254.267	254.104	3	C13H12N5O	Imino[2-(2-oxo-1,2-dihydro-3-pyridinyl)-1H-benzimidazol-5-yl]methanaminium	experimental	experimental
3420	dbank_003420	-7.9	65059	DB04457	347.221	347.063	10	C10H14N5O7P	2'-Deoxyguanosine-5'-Monophosphate	experimental	experimental
3423	dbank_003423	-7.9	321	DB04461	660.757	660.316	8	C36H44N4O8	Coproporphyrinogen III	experimental	experimental
3442	dbank_003442	-7.9	445888	DB04482	543.373	543.11	15	C17H26N3O15P	Cmp-2-Keto-3-Deoxy-Octulosonic Acid	experimental	experimental
3467	dbank_003467	-7.9	89950	DB04514	589.407	589.117	16	C19H24N7O13P	Phosphoric Acid-2'-[2'-Deoxy-Uridine]Ester-5'-Guanosine Ester	experimental	experimental
3524	dbank_003524	-7.9	5287459	DB04583	317.338	317.105	3	C20H15NO3	5-Carbamoyl-1,1':4',1''-terphenyl-3-carboxylic acid	experimental	experimental
3586	dbank_003586	-7.9	5494414	DB04662	370.449	370.212	7	C19H26N6O2	OLOMOUCINE II	experimental	experimental
3661	dbank_003661	-7.9	657077	DB04764	399.528	399.231	3	C26H29N3O	[4-(3-AMINOMETHYL-PHENYL)-PIPERIDIN-1-YL]-(5-PHENETHYL- PYRIDIN-3-YL)-METHANONE	experimental	experimental
3666	dbank_003666	-7.9	5494439	DB04771	489.568	489.27	8	C23H35N7O5	1-GUANIDINO-4-(N-NITRO-BENZOYLAMINO-L-LEUCYL-L-PROLYLAMINO)BUTANE	experimental	experimental
3734	dbank_003734	-7.9	9576912	DB04853	391.425	391.197	10	C17H25N7O4	Binodenoson	investigational	investigational
3760	dbank_003760	-7.9	64972	DB04886	370.439	370.178	4	C22H26O5	Calanolide A	investigational	investigational
3783	dbank_003783	-7.9	71360	DB04946	426.481	426.195	5	C24H27FN2O4	Iloperidone	approved	approved
3819	dbank_003819	-7.9	179340	DB05104	414.539	414.231	3	C27H30N2O2	Asimadoline	investigational	investigational
3878	dbank_003878	-7.9	91439	DB05450	416.637	416.329	3	C27H44O3	Smilagenin	investigational	investigational
3883	dbank_003883	-7.9	10341154	DB05470	404.325	404.09	3	C19H12F4N4O2	VX-702	investigational	investigational
3885	dbank_003885	-7.9	104842	DB05482	392.405	392.137	5	C22H20N2O5	7-ethyl-10-hydroxycamptothecin	investigational	investigational
3943	dbank_003943	-7.9	132971	DB05812	349.509	349.241	2	C24H31NO	Abiraterone	approved	approved
3992	dbank_003992	-7.9	60149	DB06144	440.941	440.178	2	C24H26ClFN4O	Sertindole	approved; investigational; withdrawn	approved	investigational	withdrawn
4003	dbank_004003	-7.9	472335	DB06159	393.355	393.096	6	C20H15N3O6	Rubitecan	investigational	investigational
4040	dbank_004040	-7.9	9869929	DB06237	483.951	483.179	9	C23H26ClN7O3	Avanafil	approved	approved
4059	dbank_004059	-7.9	51397022	DB06274	424.533	424.236	5	C25H32N2O4	Alvimopan	approved; investigational	approved	investigational
4086	dbank_004086	-7.9	101524	DB06362	669.56	668.18	8	C33H34Cl2N4O7	Becatecarin	investigational	investigational
4144	dbank_004144	-7.9	157049	DB06521	559.52	558.086	3	C31H27BrO3S	Ertiprotafib	investigational	investigational
4254	dbank_004254	-7.9	6450546	DB06741	375.21	374.022	3	C18H12Cl2N2O3	Gavestinel	investigational	investigational
4302	dbank_004302	-7.9	17759780	DB06829	454.335	453.025	6	C19H20BrNO5S	4-BROMO-3-(CARBOXYMETHOXY)-5-[3-(CYCLOHEXYLAMINO)PHENYL]THIOPHENE-2-CARBOXYLIC ACID	experimental	experimental
4306	dbank_004306	-7.9	9968957	DB06834	362.425	362.174	3	C21H22N4O2	N-(2-hydroxy-1,1-dimethylethyl)-1-methyl-3-(1H-pyrrolo[2,3-b]pyridin-2-yl)-1H-indole-5-carboxamide	experimental	experimental
4314	dbank_004314	-7.9	1712	DB06844	449.506	449.062	7	C21H15N5O3S2	4-[(7-OXO-7H-THIAZOLO[5,4-E]INDOL-8-YLMETHYL)-AMINO]-N-PYRIDIN-2-YL-BENZENESULFONAMIDE	experimental	experimental
4382	dbank_004382	-7.9	16752640	DB06922	389.358	389.09	6	C22H15NO6	2-[(1R)-1-carboxy-2-naphthalen-1-ylethyl]-1,3-dioxo-2,3-dihydro-1H-isoindole-5-carboxylic acid	experimental	experimental
4398	dbank_004398	-7.9	10134493	DB06940	382.416	382.175	6	C19H22N6O3	N-ethyl-4-{[5-(methoxycarbamoyl)-2-methylphenyl]amino}-5-methylpyrrolo[2,1-f][1,2,4]triazine-6-carboxamide	experimental	experimental
4399	dbank_004399	-7.9	25113615	DB06942	378.467	378.206	4	C22H26N4O2	N-(4-carbamimidoylbenzyl)-1-(3-phenylpropanoyl)-L-prolinamide	experimental	experimental
4429	dbank_004429	-7.9	21066379	DB06983	331.371	331.143	5	C19H17N5O	(5-phenyl-7-(pyridin-3-ylmethylamino)pyrazolo[1,5-a]pyrimidin-3-yl)methanol	experimental	experimental
4450	dbank_004450	-7.9	46937043	DB07005	394.49	394.224	4	C22H28N5O2	D-phenylalanyl-N-{4-[amino(iminio)methyl]benzyl}-L-prolinamide	experimental	experimental
4466	dbank_004466	-7.9	10156987	DB07025	386.489	386.211	3	C24H26N4O	3-(5-{[4-(AMINOMETHYL)PIPERIDIN-1-YL]METHYL}-1H-INDOL-2-YL)QUINOLIN-2(1H)-ONE	experimental	experimental
4470	dbank_004470	-7.9	10157080	DB07029	388.376	388.117	5	C21H16N4O4	4-(1,3-BENZODIOXOL-5-YLOXY)-2-[4-(1H-IMIDAZOL-1-YL)PHENOXY]-6-METHYLPYRIMIDINE	experimental	experimental
4494	dbank_004494	-7.9	448994	DB07054	465.444	465.179	7	C22H23F4N5O2	(2R)-1-(DIMETHYLAMINO)-3-{4-[(6-{[2-FLUORO-5-(TRIFLUOROMETHYL)PHENYL]AMINO}PYRIMIDIN-4-YL)AMINO]PHENOXY}PROPAN-2-OL	experimental	experimental
4498	dbank_004498	-7.9	25181321	DB07058	324.357	324.068	3	C16H12N4O2S	5-[1-(4-methoxyphenyl)-1H-benzimidazol-6-yl]-1,3,4-oxadiazole-2(3H)-thione	experimental	experimental
4499	dbank_004499	-7.9	6914627	DB07059	398.459	398.207	7	C20H26N6O3	N-{2-[6-(2,4-DIAMINO-6-ETHYLPYRIMIDIN-5-YL)-2,2-DIMETHYL-3-OXO-2,3-DIHYDRO-4H-1,4-BENZOXAZIN-4-YL]ETHYL}ACETAMIDE	experimental	experimental
4502	dbank_004502	-7.9	157839	DB07063	376.352	376.049	3	C18H11F3N2O2S	{3-[(4,5,7-TRIFLUORO-1,3-BENZOTHIAZOL-2-YL)METHYL]-1H-INDOL-1-YL}ACETIC ACID	experimental	experimental
4504	dbank_004504	-7.9	44629555	DB07065	427.31	426.022	5	C19H12Cl2N6S	5-(2,3-dichlorophenyl)-N-(pyridin-4-ylmethyl)-3-thiocyanatopyrazolo[1,5-a]pyrimidin-7-amine	experimental	experimental
4513	dbank_004513	-7.9	10125830	DB07078	332.353	332.116	3	C20H16N2O3	(3Z)-6-(4-HYDROXY-3-METHOXYPHENYL)-3-(1H-PYRROL-2-YLMETHYLENE)-1,3-DIHYDRO-2H-INDOL-2-ONE	experimental	experimental
4525	dbank_004525	-7.9	40636608	DB07090	334.84	334.145	2	C18H23ClN2O2	(3S)-N-(3-CHLORO-2-METHYLPHENYL)-1-CYCLOHEXYL-5-OXOPYRROLIDINE-3-CARBOXAMIDE	experimental	experimental
4544	dbank_004544	-7.9	20843156	DB07113	469.484	469.193	7	C24H25F2N5O3	(2S)-6-(2,4-DIAMINO-6-ETHYLPYRIMIDIN-5-YL)-2-(3,5-DIFLUOROPHENYL)-4-(3-METHOXYPROPYL)-2H-1,4-BENZOXAZIN-3(4H)-ONE	experimental	experimental
4593	dbank_004593	-7.9	9884318	DB07167	339.388	339.158	4	C19H21N3O3	5-CYANO-FURAN-2-CARBOXYLIC ACID [5-HYDROXYMETHYL-2-(4-METHYL-PIPERIDIN-1-YL)-PHENYL]-AMIDE	experimental	experimental
4608	dbank_004608	-7.9	16040289	DB07183	396.441	396.159	4	C24H20N4O2	N-(4-phenoxyphenyl)-2-[(pyridin-4-ylmethyl)amino]nicotinamide	experimental	experimental
4613	dbank_004613	-7.9	1283969	DB07188	355.259	354.09	2	C17H20Cl2N2O2	(3S)-1-CYCLOHEXYL-N-(3,5-DICHLOROPHENYL)-5-OXOPYRROLIDINE-3-CARBOXAMIDE	experimental	experimental
4636	dbank_004636	-7.9	9547909	DB07216	473.031	472.17	5	C24H29ClN4O2S	(11S)-8-CHLORO-11-[1-(METHYLSULFONYL)PIPERIDIN-4-YL]-6-PIPERAZIN-1-YL-11H-BENZO[5,6]CYCLOHEPTA[1,2-B]PYRIDINE	experimental	experimental
4670	dbank_004670	-7.9	25011729	DB07253	418.854	418.05	8	C18H15ClN4O4S	N'-(5-chloro-1,3-benzodioxol-4-yl)-N-(3-methylsulfonylphenyl)pyrimidine-2,4-diamine	experimental	experimental
4738	dbank_004738	-7.9	23658582	DB07326	433.771	433.055	5	C19H11ClF3N5O2	6-chloro-N-pyrimidin-5-yl-3-{[3-(trifluoromethyl)phenyl]amino}-1,2-benzisoxazole-7-carboxamide	experimental	experimental
4760	dbank_004760	-7.9	16741275	DB07351	464.406	464.135	6	C21H25N2O8P	O-(((1R)-((N-(PHENYL-METHOXY-CARBONYL)-ALANYL)-AMINO)METHYL)HYDROXYPHOSPHINYL)3-L-PHENYLLACTATE	experimental	experimental
4770	dbank_004770	-7.9	15602701	DB07362	462.451	462.12	6	C19H17F3N8OS	1-(5-{2-[(1-methyl-1H-pyrazolo[4,3-d]pyrimidin-7-yl)amino]ethyl}-1,3-thiazol-2-yl)-3-[3-(trifluoromethyl)phenyl]urea	experimental	experimental
4798	dbank_004798	-7.9	12148754	DB07396	455.815	455.086	5	C20H17ClF3N3O4	1-{2-[3-(2-Chloro-4,5-difluoro-benzoyl)-ureido]-4-fluoro-phenyl}-piperidine-4-carboxylic acid	experimental	experimental
4803	dbank_004803	-7.9	46937068	DB07402	298.34	298.143	4	C16H18N4O2	Azapropazone	withdrawn	withdrawn
4854	dbank_004854	-7.9	9934347	DB07460	468.936	468.168	8	C23H25ClN6O3	2-({5-CHLORO-2-[(2-METHOXY-4-MORPHOLIN-4-YLPHENYL)AMINO]PYRIMIDIN-4-YL}AMINO)-N-METHYLBENZAMIDE	experimental	experimental
4892	dbank_004892	-7.9	25134257	DB07507	329.349	329.105	3	C21H15NO3	2-(4-hydroxybiphenyl-3-yl)-4-methyl-1H-isoindole-1,3(2H)-dione	experimental	experimental
4906	dbank_004906	-7.9	9543486	DB07522	370.465	370.135	4	C20H22N2O3S	N-[(2R,3S)-3-AMINO-2-HYDROXY-4-PHENYLBUTYL]NAPHTHALENE-2-SULFONAMIDE	experimental	experimental
4917	dbank_004917	-7.9	5729339	DB07534	349.385	349.019	4	C14H11N3O4S2	4-{5-[(Z)-(2-IMINO-4-OXO-1,3-THIAZOLIDIN-5-YLIDENE)METHYL]FURAN-2-YL}BENZENESULFONAMIDE	experimental	experimental
4922	dbank_004922	-7.9	5951796	DB07539	314.316	314.036	4	C15H10N2O4S	4-{5-[(Z)-(2-IMINO-4-OXO-1,3-THIAZOLIDIN-5-YLIDENE)METHYL]FURAN-2-YL}BENZOIC ACID	experimental	experimental
4923	dbank_004923	-7.9	23647659	DB07540	363.411	363.035	4	C15H13N3O4S2	4-{5-[(1Z)-1-(2-IMINO-4-OXO-1,3-THIAZOLIDIN-5-YLIDENE)ETHYL]-2-FURYL}BENZENESULFONAMIDE	experimental	experimental
5026	dbank_005026	-7.9	5330812	DB07664	425.436	425.054	6	C15H13F2N7O2S2	5-AMINO-3-{[4-(AMINOSULFONYL)PHENYL]AMINO}-N-(2,6-DIFLUOROPHENYL)-1H-1,2,4-TRIAZOLE-1-CARBOTHIOAMIDE	experimental	experimental
5169	dbank_005169	-7.9	10224181	DB07827	424.448	424.142	4	C26H20N2O4	4-{[1-METHYL-2,4-DIOXO-6-(3-PHENYLPROP-1-YN-1-YL)-1,4-DIHYDROQUINAZOLIN-3(2H)-YL]METHYL}BENZOIC ACID	experimental	experimental
5172	dbank_005172	-7.9	10477723	DB07831	429.435	429.166	3	C23H22F3N3O2	2-{[(6-OXO-1,6-DIHYDROPYRIDIN-3-YL)METHYL]AMINO}-N-[4-PROPYL-3-(TRIFLUOROMETHYL)PHENYL]BENZAMIDE	experimental	experimental
5173	dbank_005173	-7.9	23644582	DB07832	361.417	361.088	5	C20H15N3O2S	4-{4-[(5-hydroxy-2-methylphenyl)amino]quinolin-7-yl}-1,3-thiazole-2-carbaldehyde	experimental	experimental
5211	dbank_005211	-7.9	42628060	DB07872	474.936	474.093	4	C22H20ClFN4O3S	5-chloro-N-[(3R)-1-(2-{[2-fluoro-4-(2-oxopyridin-1(2H)-yl)phenyl]amino}-2-oxoethyl)pyrrolidin-3-yl]thiophene-2-carboxamide	experimental	experimental
5246	dbank_005246	-7.9	6540277	DB07917	377.483	377.222	5	C22H27N5O	4-(BENZHYDRYLOXY)-1-[3-(1H-TETRAAZOL-5-YL)PROPYL]PIPERIDINE	experimental	experimental
5303	dbank_005303	-7.9	15942658	DB07977	443.344	443.025	4	C19H10F5NO4S	3-({[3,5-DIFLUORO-3'-(TRIFLUOROMETHOXY)BIPHENYL-4-YL]AMINO}CARBONYL)THIOPHENE-2-CARBOXYLIC ACID	experimental	experimental
5305	dbank_005305	-7.9	16741227	DB07981	428.909	428.15	4	C23H25ClN2O4	2-[1-(4-chlorobenzoyl)-5-methoxy-2-methyl-1H-indol-3-yl]-n-[(1R)-1-(hydroxymethyl)propyl]acetamide	experimental	experimental
5317	dbank_005317	-7.9	11507920	DB07993	314.384	314.153	3	C20H18N4	N~3~-[3-(1H-INDOL-6-YL)BENZYL]PYRIDINE-2,3-DIAMINE	experimental	experimental
5360	dbank_005360	-7.9	5312137	DB08039	371.453	371.13	3	C19H21N3O3S	(3Z)-N,N-DIMETHYL-2-OXO-3-(4,5,6,7-TETRAHYDRO-1H-INDOL-2-YLMETHYLIDENE)-2,3-DIHYDRO-1H-INDOLE-5-SULFONAMIDE	experimental	experimental
5528	dbank_005528	-7.9	447649	DB08233	339.392	339.17	6	C18H21N5O2	6-CYCLOHEXYLMETHYLOXY-2-(4'-HYDROXYANILINO)PURINE	experimental	experimental
5603	dbank_005603	-7.9	11669698	DB08322	456.399	456.106	8	C23H20O10	2-DEOXY-3,4-BIS-O-[3-(4-HYDROXYPHENYL)PROPANOYL]-L-THREO-PENTARIC ACID	experimental	experimental
5685	dbank_005685	-7.9	5327066	DB08423	380.415	380.165	5	C21H21FN4O2	[5-AMINO-1-(4-FLUOROPHENYL)-1H-PYRAZOL-4-YL][3-(PIPERIDIN-4-YLOXY)PHENYL]METHANONE	experimental	experimental
5697	dbank_005697	-7.9	439530	DB08437	471.51	471.223	10	C22H29N7O5	Puromycin	experimental	experimental
5749	dbank_005749	-7.9	46937155	DB08498	400.769	400.046	5	C19H13ClN2O6	(1S)-1-(3-chlorophenyl)-2-oxo-2-[(1,3,4-trioxo-1,2,3,4-tetrahydroisoquinolin-5-yl)amino]ethyl acetate	experimental	experimental
5779	dbank_005779	-7.9	21066087	DB08531	370.235	369.055	4	C18H13Cl2N5	5-(2,3-dichlorophenyl)-N-(pyridin-4-ylmethyl)pyrazolo[1,5-a]pyrimidin-7-amine	experimental	experimental
5782	dbank_005782	-7.9	21066096	DB08534	319.336	319.123	4	C18H14FN5	5-(2-fluorophenyl)-N-(pyridin-4-ylmethyl)pyrazolo[1,5-a]pyrimidin-7-amine	experimental	experimental
5826	dbank_005826	-7.9	23647311	DB08588	359.424	359.175	5	C21H21N5O	2-({2-[(3R)-3-AMINOPIPERIDIN-1-YL]-4-OXOQUINAZOLIN-3(4H)-YL}METHYL)BENZONITRILE	experimental	experimental
5829	dbank_005829	-7.9	4369451	DB08591	318.348	318.067	5	C15H14N2O4S	5-(4-METHOXYBIPHENYL-3-YL)-1,2,5-THIADIAZOLIDIN-3-ONE 1,1-DIOXIDE	experimental	experimental
5892	dbank_005892	-7.9	11840988	DB08666	268.203	268.068	6	C10H7F3N6	5-imino-4-(3-trifluoromethyl-phenylazo)-5H-pyrazol-3-ylamine	experimental	experimental
5927	dbank_005927	-7.9	2765355	DB08707	322.748	322.062	4	C17H11ClN4O	4-[3-(4-chlorophenyl)-2,1-benzisoxazol-5-yl]pyrimidin-2-amine	experimental	experimental
5928	dbank_005928	-7.9	10361208	DB08708	361.364	361.151	4	C18H18F3N5	N-cyclohexyl-3-[3-(trifluoromethyl)phenyl][1,2,4]triazolo[4,3-b]pyridazin-6-amine	experimental	experimental
6081	dbank_006081	-7.9	24812758	DB08907	444.516	444.141	5	C24H25FO5S	Canagliflozin	approved	approved
6148	dbank_006148	-7.9	29088	DB08994	324.374	324.147	4	C19H20N2O3	Ditazole	experimental; withdrawn	experimental	withdrawn
6275	dbank_006275	-7.9	204109	DB09199	381.42	381.083	3	C21H16FNO3S	Netoglitazone	experimental	experimental
6294	dbank_006294	-7.9	28689	DB09219	333.343	333.1	4	C20H15NO4	Bisoxatin	approved	approved
6328	dbank_006328	-7.9	5243	DB09268	437.44	437.024	7	C18H15NO8S2	Picosulfuric acid	approved	approved
6421	dbank_006421	-7.9	65079	DB11184	622.539	622.143	13	C30H26N2O13	Oftasceine	approved	approved
6434	dbank_006434	-7.9	444412	DB11256	459.456	459.187	12	C20H25N7O6	Levomefolic acid	approved; investigational	approved	investigational
6552	dbank_006552	-7.9	56928061	DB11520	527.524	527.233	16	C20H37N3O13	Hygromycin B	vet_approved	vet_approved
6556	dbank_006556	-7.9	9906614	DB11529	354.49	354.219	3	C23H30O3	Melengestrol	vet_approved	vet_approved
6600	dbank_006600	-7.9	24986635	DB11645	393.51	393.151	3	C22H23N3O2S	PF-4191834	investigational	investigational
6607	dbank_006607	-7.9	5042	DB11656	370.79	370.072	5	C19H15ClN2O4	Rebamipide	investigational	investigational
6675	dbank_006675	-7.9	16720766	DB11759	443.519	443.163	7	C21H25N5O4S	Pevonedistat	investigational	investigational
6694	dbank_006694	-7.9	16122802	DB11786	519.553	519.241	4	C26H34F5NO4	Pefcalcitol	investigational	investigational
6706	dbank_006706	-7.9	9911830	DB11800	454.863	454.104	5	C22H19ClN4O5	Tivozanib	investigational	investigational
6718	dbank_006718	-7.9	16755143	DB11819	442.321	442.086	4	C19H12F6N4O2	ASP-4058	investigational	investigational
6721	dbank_006721	-7.9	44556044	DB11822	606.74	606.251	7	C32H38N4O6S	TMC-647055	investigational	investigational
6823	dbank_006823	-7.9	59568713	DB11968	466.534	466.21	6	C26H30N2O6	MK-7145	investigational	investigational
6837	dbank_006837	-7.9	26248	DB11994	368.297	368.053	6	C19H12O8	Diacerein	approved; investigational	approved	investigational
6846	dbank_006846	-7.9	66550890	DB12006	556.509	556.191	4	C26H26F6N4O3	BMS-906024	investigational	investigational
6873	dbank_006873	-7.9	135564985	DB12047	364.398	364.154	4	C20H20N4O3	Ganetespib	investigational	investigational
6877	dbank_006877	-7.9	5318997	DB12052	676.668	676.237	15	C33H40O15	Icariin	investigational	investigational
6897	dbank_006897	-7.9	7074810	DB12081	344.451	344.199	4	C21H28O4	Anecortave	investigational	investigational
6928	dbank_006928	-7.9	10950142	DB12124	434.452	434.159	7	C23H22N4O5	Namitecan	investigational	investigational
6932	dbank_006932	-7.9	11313622	DB12129	334.39	334.078	2	C19H14N2O2S	Tideglusib	investigational; withdrawn	investigational	withdrawn
6941	dbank_006941	-7.9	49803313	DB12141	552.724	552.354	10	C29H44N8O3	Gilteritinib	approved; investigational	approved	investigational
6959	dbank_006959	-7.9	57519748	DB12167	406.486	406.2	5	C23H26N4O3	LY-3023414	investigational	investigational
6972	dbank_006972	-7.9	11465618	DB12188	354.92	354.186	2	C22H27ClN2	Zicronapine	investigational	investigational
6982	dbank_006982	-7.9	44623946	DB12206	414.457	414.169	4	C24H22N4O3	N-6022	investigational	investigational
7002	dbank_007002	-7.9	124246	DB12233	374.37	374.057	5	C17H14N2O6S	Iguratimod	investigational	investigational
7009	dbank_007009	-7.9	24963252	DB12241	504.227	504.011	6	C17H15F2IN4O4	TAK-733	investigational	investigational
7080	dbank_007080	-7.9	71600094	DB12336	564.71	564.252	6	C29H36N6O4S	GDC-0917	investigational	investigational
7093	dbank_007093	-7.9	57899889	DB12357	289.717	289.062	3	C14H12ClN3O2	BMS-863233	investigational	investigational
7137	dbank_007137	-7.9	11188409	DB12415	388.545	388.251	2	C26H32N2O	Galeterone	investigational	investigational
7159	dbank_007159	-7.9	9910098	DB12443	421.84	421.115	9	C18H20ClN5O5	Sonedenoson	investigational	investigational
7187	dbank_007187	-7.9	24989044	DB12483	480.529	480.223	11	C23H28N8O4	Copanlisib	approved; investigational	approved	investigational
7196	dbank_007196	-7.9	25230468	DB12504	461.61	461.279	5	C27H35N5O2	JNJ-40346527	investigational	investigational
7202	dbank_007202	-7.9	9890879	DB12511	470.525	470.184	6	C28H26N2O5	Imiglitazar	investigational	investigational
7210	dbank_007210	-7.9	65906	DB12523	432.503	432.207	5	C24H25FN6O	Mizolastine	approved; investigational	approved	investigational
7225	dbank_007225	-7.9	49837968	DB12547	390.41	390.096	5	C18H16F2N4O2S	LY-2886721	investigational	investigational
7326	dbank_007326	-7.9	56928390	DB12706	482.85	482.087	6	C23H14ClF3N6O	Seletalisib	investigational	investigational
7362	dbank_007362	-7.9	6450821	DB12757	463.51	463.153	9	C20H25N5O6S	Pelitrexol	investigational	investigational
7386	dbank_007386	-7.9	25184541	DB12796	408.337	408.105	6	C18H15F3N4O4	MRX-I	investigational	investigational
7417	dbank_007417	-7.9	177941	DB12850	544.619	544.226	5	C33H33FO6	Etalocib	investigational	investigational
7422	dbank_007422	-7.9	45100669	DB12857	432.572	432.264	7	C25H32N6O	NVP-LEQ-506	investigational	investigational
7433	dbank_007433	-7.9	4615	DB12877	426.564	426.242	3	C27H30N4O	Oxatomide	investigational	investigational
7461	dbank_007461	-7.9	15981237	DB12914	435.22	434.03	6	C17H12Cl2N6O4	MGL-3196	investigational	investigational
7478	dbank_007478	-7.9	456557	DB12939	495.445	495.16	12	C20H25N5O10	Nikkomycin Z	investigational	investigational
7503	dbank_007503	-7.9	25151352	DB12978	417.82	417.097	4	C20H15ClF3N5	Pexidartinib	approved; investigational	approved	investigational
7578	dbank_007578	-7.9	6433122	DB13094	376.435	376.17	3	C22H21FN4O	Pruvanserin	investigational	investigational
7626	dbank_007626	-7.9	68952	DB13185	414.586	414.277	3	C26H38O4	Oxabolone cipionate	experimental	experimental
7830	dbank_007830	-7.9	5361871	DB13470	584.669	584.028	12	C20H20N6O7S4	Cefodizime	experimental	experimental
7831	dbank_007831	-7.9	6445230	DB13471	476.573	476.231	5	C28H32N2O5	Nalfurafine	experimental; investigational	experimental	investigational
7937	dbank_007937	-7.9	183797	DB13616	429.513	429.238	7	C22H31N5O4	Melagatran	experimental	experimental
7974	dbank_007974	-7.9	9571080	DB13667	515.52	515.079	10	C19H17N9O5S2	Cefozopran	experimental	experimental
7989	dbank_007989	-7.9	5479539	DB13682	514.577	514.109	8	C22H22N6O5S2	Cefpirome	approved	approved
8154	dbank_008154	-7.9	441404	DB13943	412.614	412.298	2	C27H40O3	Testosterone cypionate	approved	approved
8192	dbank_008192	-7.9	92135969	DB14017	555.716	555.331	6	C31H45N3O6	H3B-8800	investigational	investigational
8195	dbank_008195	-7.9	60063	DB14025	365.79	365.094	6	C17H17ClFN3O3	Clinafloxacin	investigational	investigational
8210	dbank_008210	-7.9	119034	DB14054	488.699	488.35	5	C30H48O5	Asiatic acid	experimental	experimental
8309	dbank_008309	-7.9	16623	DB14545	462.539	462.225	7	C25H34O8	Hydrocortisone succinate	approved	approved
8408	dbank_008408	-7.9	121304016	DB14761	602.585	602.225	9	C27H35N6O8P	Remdesivir	experimental	experimental
8412	dbank_008412	-7.9	71535003	DB14768	431.88	431.147	7	C19H22ClN7O3	PF-06459988	investigational	investigational
8414	dbank_008414	-7.9	118161062	DB14770	443.515	443.218	9	C23H25N9O	Lanraplenib	investigational	investigational
8418	dbank_008418	-7.9	56960912	DB14775	299.71	299.035	4	C16H10ClNO3	Cavosonstat	investigational	investigational
8440	dbank_008440	-7.9	73777259	DB14844	386.499	386.211	4	C24H26N4O	ONC-201	investigational	investigational
8496	dbank_008496	-7.9	51038316	DB14944	601.87	600.087	8	C24H24BrClN9O3	Tarloxotinib	investigational	investigational
8526	dbank_008526	-7.9	51049992	DB15046	491.631	491.246	4	C33H33NO3	LY-2881835	investigational	investigational
8531	dbank_008531	-7.9	46851313	DB15055	455.9	455.088	4	C20H20ClF2N3O3S	ABT-639	investigational	investigational
8537	dbank_008537	-7.9	24737742	DB15063	703.62	703.167	14	C25H34N7O13PS	Inarigivir soproxil	investigational	investigational
8555	dbank_008555	-7.9	86705695	DB15102	487.508	487.203	6	C24H27F2N5O4	Pemigatinib	investigational	investigational
8560	dbank_008560	-7.9	49792852	DB15110	532.518	532.216	9	C24H27F3N8O3	Onvansertib	investigational	investigational
8567	dbank_008567	-7.9	57920094	DB15123	462.93	462.167	6	C22H27ClN4O5	Dorzagliatin	investigational	investigational
8634	dbank_008634	-7.9	16719221	DB15254	471.46	471.101	7	C21H18FN5O5S	RO-5126766 free base	investigational	investigational
8642	dbank_008642	-7.9	25073775	DB15273	501.51	501.199	7	C25H26F3N5O3	VS-4718	investigational	investigational
8646	dbank_008646	-7.9	15251064	DB15282	427.503	427.202	4	C25H29FO5	Fluorofuranylnorprogesterone F-18	investigational	investigational
8683	dbank_008683	-7.9	121293929	DB15347	370.428	370.181	3	C20H23FN4O2	Branebrutinib	investigational	investigational
8697	dbank_008697	-7.9	68488178	DB15385	481.552	481.2	5	C29H27N3O4	Acebilustat	investigational	investigational
8698	dbank_008698	-7.9	57827330	DB15391	437.44	437.113	6	C19H18F3N5O2S	Elenbecestat	investigational	investigational
8699	dbank_008699	-7.9	9808844	DB15393	409.83	409.094	6	C20H16ClN5O3	Telatinib	investigational	investigational
8717	dbank_008717	-7.9	24983461	DB15425	397.527	397.259	7	C21H31N7O	CYC-065	investigational	investigational
8724	dbank_008724	-7.9	53630042	DB15440	403.523	403.247	5	C22H33N3O4	GSK-3117391	investigational	investigational
8728	dbank_008728	-7.9	9820008	DB15446	355.365	355.122	4	C20H18FNO4	Vidofludimus	investigational	investigational
8767	dbank_008767	-7.9	164090	DB15585	445.647	445.298	3	C30H39NO2	ORG-31710	experimental	experimental
2	dbank_000002	-7.8	91443	DB00116	445.429	445.171	12	C19H23N7O6	Tetrahydrofolic acid	nutraceutical	nutraceutical
25	dbank_000025	-7.8	493570	DB00140	376.364	376.138	9	C17H20N4O6	Riboflavin	approved; investigational; nutraceutical; vet_approved	approved	investigational	nutraceutical	vet_approved
120	dbank_000120	-7.8	60854	DB00246	412.936	412.112	4	C21H21ClN4OS	Ziprasidone	approved	approved
182	dbank_000182	-7.8	123631	DB00317	446.902	446.152	7	C22H24ClFN4O3	Gefitinib	approved; investigational	approved	investigational
216	dbank_000216	-7.8	4046	DB00358	378.312	378.117	3	C17H16F6N2O	Mefloquine	approved; investigational	approved	investigational
253	dbank_000253	-7.8	2118	DB00404	308.765	308.083	3	C17H13ClN4	Alprazolam	approved; illicit; investigational	approved	illicit	investigational
317	dbank_000317	-7.8	5035	DB00481	473.583	473.166	5	C28H27NO4S	Raloxifene	approved; investigational	approved	investigational
318	dbank_000318	-7.8	2662	DB00482	381.372	381.076	3	C17H14F3N3O2S	Celecoxib	approved; investigational	approved	investigational
364	dbank_000364	-7.8	2170	DB00543	313.781	313.098	3	C17H16ClN3O	Amoxapine	approved	approved
532	dbank_000532	-7.8	443387	DB00739	389.469	389.141	5	C19H23N3O4S	Hetacillin	approved; vet_approved; withdrawn	approved	vet_approved	withdrawn
534	dbank_000534	-7.8	5754	DB00741	362.46	362.209	5	C21H30O5	Hydrocortisone	approved; vet_approved	approved	vet_approved
670	dbank_000670	-7.8	35330	DB00901	461.549	461.22	4	C28H31NO5	Bitolterol	withdrawn	withdrawn
729	dbank_000729	-7.8	124087	DB00967	310.821	310.124	2	C19H19ClN2	Desloratadine	approved; investigational	approved	investigational
731	dbank_000731	-7.8	2099	DB00969	294.351	294.148	2	C17H18N4O	Alosetron	approved; withdrawn	approved	withdrawn
737	dbank_000737	-7.8	3948	DB00978	351.348	351.139	6	C17H19F2N3O3	Lomefloxacin	approved; investigational	approved	investigational
809	dbank_000809	-7.8	33613	DB01060	365.404	365.105	6	C16H19N3O5S	Amoxicillin	approved; vet_approved	approved	vet_approved
816	dbank_000816	-7.8	3478	DB01067	445.535	445.178	6	C21H27N5O4S	Glipizide	approved; investigational	approved	investigational
840	dbank_000840	-7.8	1548972	DB01095	411.466	411.185	4	C24H26FNO4	Fluvastatin	approved	approved
1067	dbank_001067	-7.8	33887	DB01430	477.552	477.245	7	C26H29F2N7	Almitrine	approved	approved
1166	dbank_001166	-7.8	3380	DB01544	313.283	313.086	4	C16H12FN3O3	Flunitrazepam	approved; illicit	approved	illicit
1195	dbank_001195	-7.8	5362507	DB01573	375.46	375.183	4	C24H25NO3	Benzylmorphine	experimental; illicit	experimental	illicit
1249	dbank_001249	-7.8	46936180	DB01641	357.364	357.144	7	C17H19N5O4	{(4Z)-2-[(1R,2R)-1-Amino-2-hydroxypropyl]-4-[(4-amino-1H-indol-3-yl)methylene]-5-oxo-4,5-dihydro-1H-imidazol-1-yl}acetic acid	experimental	experimental
1345	dbank_001345	-7.8	1282	DB01767	290.323	290.128	4	C16H14N6	Hemi-Babim	experimental	experimental
1413	dbank_001413	-7.8	5280863	DB01852	286.236	286.048	6	C15H10O6	Kaempherol	experimental	experimental
1475	dbank_001475	-7.8	5287792	DB01944	292.332	292.121	4	C18H16N2O2	(S)-blebbistatin	experimental	experimental
1504	dbank_001504	-7.8	447732	DB01977	289.331	289.122	3	C18H15N3O	6-(N-Phenylcarbamyl)-2-Naphthalenecarboxamidine	experimental	experimental
1529	dbank_001529	-7.8	447994	DB02014	413.353	413.091	6	C21H16FNO7	5-(2-Fluoro-5-{(1E)-3-[3-hydroxy-2-(methoxycarbonyl)phenoxy]-1-propen-1-yl}phenyl)-1,2-oxazole-3-carboxylic acid	experimental	experimental
1571	dbank_001571	-7.8	5478838	DB02062	418.423	418.166	6	C21H27N2O5P	N-[3-[(1-Aminoethyl)(Hydroxy)Phosphoryl]-2-(1,1'-Biphenyl-4-Ylmethyl)Propanoyl]Alanine	experimental	experimental
1603	dbank_001603	-7.8	154044	DB02102	536.664	536.279	5	C33H36N4O3	DMP450	experimental	experimental
1615	dbank_001615	-7.8	4592	DB02116	298.343	298.154	6	C15H18N6O	Olomoucine	experimental	experimental
1628	dbank_001628	-7.8	5724	DB02132	441.636	439.957	4	C17H11BrClFN2O4	Zenarestat	experimental	experimental
1650	dbank_001650	-7.8	5288230	DB02164	536.407	536.061	13	C17H21N4O12PS	N-sulfo-flavin mononucleotide	experimental	experimental
1661	dbank_001661	-7.8	65103	DB02181	507.181	506.996	13	C10H16N5O13P3	2'-Deoxyguanosine-5'-Triphosphate	experimental	experimental
1671	dbank_001671	-7.8	5288238	DB02195	305.306	305.096	3	C18H12FN3O	3-(4-Fluorophenyl)-1-Hydroxy-2-(Pyridin-4-Yl)-1h-Pyrrolo[3,2-B]Pyridine	experimental	experimental
1672	dbank_001672	-7.8	23700	DB02196	607.354	607.082	14	C17H27N3O17P2	Uridine-Diphosphate-N-Acetylgalactosamine	experimental	experimental
1687	dbank_001687	-7.8	5288101	DB02217	410.315	410.088	8	C17H19N2O8P	Dpb-T	experimental	experimental
1755	dbank_001755	-7.8	6323520	DB02301	455.424	455.155	12	C20H21N7O6	5,10-Methylene-6-Hydrofolic Acid	experimental	experimental
1888	dbank_001888	-7.8	445576	DB02466	362.461	362.188	3	C24H26O3	4-[3-Oxo-3-(5,5,8,8-Tetramethyl-5,6,7,8-Tetrahydro-Naphthalen-2-Yl)-Propenyl]-Benzoic Acid	experimental	experimental
1908	dbank_001908	-7.8	447622	DB02491	451.992	451.214	6	C25H30ClN5O	4-[4-(1-Amino-1-Methylethyl)Phenyl]-5-Chloro-N-[4-(2-Morpholin-4-Ylethyl)Phenyl]Pyrimidin-2-Amine	experimental	experimental
1955	dbank_001955	-7.8	439912	DB02547	589.342	589.082	16	C16H25N5O15P2	Guanosine-5'-Diphosphate-Rhamnose	experimental	experimental
1966	dbank_001966	-7.8	17754203	DB02559	307.477	307.274	5	C17H33N5	6-(Octahydro-1h-Indol-1-Ylmethyl)Decahydroquinazoline-2,4-Diamine	experimental	experimental
2043	dbank_002043	-7.8	3973	DB02656	307.343	307.121	4	C19H17NO3	LY-294002	experimental	experimental
2091	dbank_002091	-7.8	444378	DB02716	538.215	538.014	13	C11H19N5O14P3	7-methyl-guanosine-5'-triphosphate	experimental	experimental
2149	dbank_002149	-7.8	5289464	DB02800	473.439	473.166	12	C20H23N7O7	5-hydroxymethyl-5,6-dihydrofolic acid	experimental	experimental
2161	dbank_002161	-7.8	5287596	DB02812	446.523	446.174	8	C20H26N6O4S	(2S,4R)-1-acetyl-N-[(2S)-1-(1,3-benzothiazol-2-yl)-5-(diaminomethylideneamino)-1-oxopentan-2-yl]-4-hydroxypyrrolidine-2-carboxamide	experimental	experimental
2221	dbank_002221	-7.8	65355	DB02887	464.153	463.979	10	C10H15N2O13P3	2',3'-Dehydro-2',3'-Deoxy-Thymidine 5'-Triphosphate	experimental	experimental
2386	dbank_002386	-7.8	164628	DB03103	402.188	402.023	9	C10H16N2O11P2	Thymidine-5'- Diphosphate	experimental	experimental
2428	dbank_002428	-7.8	447462	DB03161	534.303	534.065	12	C15H24N2O15P2	Thymidine-5'-diphospho-beta-D-xylose	experimental	experimental
2475	dbank_002475	-7.8	4369101	DB03221	403.497	403.033	6	C14H17N3O5S3	AL7099A	experimental	experimental
2498	dbank_002498	-7.8	643976	DB03247	456.344	456.105	11	C17H21N4O9P	Flavin mononucleotide	approved; investigational	approved	investigational
2502	dbank_002502	-7.8	5289320	DB03251	387.499	387.173	6	C19H25N5O2S	RWJ-51084	experimental	experimental
2528	dbank_002528	-7.8	638278	DB03285	256.253	256.074	4	C15H12O4	2',4,4'-Trihydroxychalcone	experimental	experimental
2552	dbank_002552	-7.8	8339	DB03315	363.221	363.058	10	C10H14N5O8P	Guanosine 3'-monophosphate	experimental	experimental
2583	dbank_002583	-7.8	445439	DB03355	447.424	447.117	13	C14H21N7O8S	5'-O-(L-Threonylsulfamoyl)adenosine	experimental	experimental
2595	dbank_002595	-7.8	1836	DB03368	310.304	310.095	3	C17H14N2O4	5-Methyl-5-(4-Phenoxy-Phenyl)-Pyrimidine-2,4,6-Trione	experimental	experimental
2679	dbank_002679	-7.8	448923	DB03488	568.293	568.051	13	C15H23FN2O16P2	Uridine-5'-diphosphate-2-deoxy-2-fluoro-alpha-D-galactose	experimental	experimental
2711	dbank_002711	-7.8	449108	DB03532	521.208	521.011	15	C11H18N5O13P3	Phosphomethylphosphonic acid guanylate ester	experimental	experimental
2720	dbank_002720	-7.8	131704252	DB03546	549.497	549.205	12	C22H30F3N5O8	N-({4-[(1R)-4-[(2R,4S,5S)-2,4-diamino-6-oxohexahydropyrimidin-5-yl]-1-(2,2,2-trifluoro-1,1-dihydroxyethyl)butyl]phenyl}carbonyl)-L-glutamic acid	experimental	experimental
2783	dbank_002783	-7.8	447657	DB03638	588.422	588.133	16	C19H25N8O12P	Cytidyl-2'-5'-phospho-guanosine	experimental	experimental
2999	dbank_002999	-7.8	5289288	DB03903	483.515	483.179	7	C28H25N3O5	Tmr	experimental	experimental
3044	dbank_003044	-7.8	5288989	DB03962	822.301	820.986	18	C21H27BrN7O17P3	Nicotinamide 8-Bromo-Adenine Dinucleotide Phosphate	experimental	experimental
3068	dbank_003068	-7.8	5288685	DB03996	314.766	314.082	3	C17H15ClN2O2	3-[(5s)-1-Acetyl-3-(2-Chlorophenyl)-4,5-Dihydro-1h-Pyrazol-5-Yl]Phenol	experimental	experimental
3087	dbank_003087	-7.8	9957008	DB04020	485.045	484.181	7	C24H29ClN6OS	4-(2-{[4-{[3-(4-Chlorophenyl)Propyl]Sulfanyl}-6-(1-Piperazinyl)-1,3,5-Triazin-2-Yl]Amino}Ethyl)Phenol	experimental	experimental
3095	dbank_003095	-7.8	4470577	DB04030	398.454	398.163	3	C25H22N2O3	1,3,4,9-Tetrahydro-2-(Hydroxybenzoyl)-9-[(4-Hydroxyphenyl)Methyl]-6-Methoxy-2h-Pyrido[3,4-B]Indole	experimental	experimental
3102	dbank_003102	-7.8	17753826	DB04042	664.765	664.245	10	C35H40N2O9S	2-[4-(Hydroxy-Methoxy-Methyl)-Benzyl]-7-(4-Hydroxymethyl-Benzyl)-1,1-Dioxo-3,6-Bis-Phenoxymethyl-1lambda6-[1,2,7]Thiadiazepane-4,5-Diol	experimental	experimental
3146	dbank_003146	-7.8	448872	DB04097	568.293	568.051	13	C15H23FN2O16P2	Uridine-5'-diphosphate-4-deoxy-4-fluoro-alpha-D-galactose	experimental	experimental
3155	dbank_003155	-7.8	9600423	DB04107	525.601	525.249	8	C29H31N7O3	[(1-{2[(4-Carbamimidoyl-Phenylamino)-Methyl]-1-Methyl-1h-Benzoimidazol-5-Yl}-Cyclopropyl)-Pyridin-2-Yl-Methyleneaminooxy]-Acetic Acid Ethyl Ester	experimental	experimental
3347	dbank_003347	-7.8	449123	DB04350	674.705	674.314	12	C29H42N10O9	Argadin	experimental	experimental
3395	dbank_003395	-7.8	17754101	DB04421	747.542	747.167	16	C26H35N7O15P2	Nicotinamide adenine dinucleotide 3-pentanone adduct	experimental	experimental
3489	dbank_003489	-7.8	455742	DB04542	427.201	427.029	11	C10H15N5O10P2	3'-Azido-3'-Deoxythymidine-5'-Diphosphate	experimental	experimental
3527	dbank_003527	-7.8	6852220	DB04590	417.431	417.17	8	C21H24FN3O5	(2R)-({4-[AMINO(IMINO)METHYL]PHENYL}AMINO){5-ETHOXY-2-FLUORO-3-[(3R)-TETRAHYDROFURAN-3-YLOXY]PHENYL}ACETICACID	experimental	experimental
3605	dbank_003605	-7.8	24360	DB04690	348.352	348.111	4	C20H16N2O4	Camptothecin	experimental	experimental
3621	dbank_003621	-7.8	5459370	DB04708	623.738	623.3	6	C37H41N3O6	(S)-TETRAHYDROFURAN-3-YL (2S,3S)-4-((S)-4-((1R,3R)-3-(2-AMINO-2-OXOETHYL)-2,3-DIHYDRO-1H-INDEN-1-YL)-2-BENZYL-3-OXO-2,3-DIHYDRO-1H-PYRROL-2-YL)-3-HYDROXY-1-PHENYLBUTAN-2-YLCARBAMATE	experimental	experimental
3626	dbank_003626	-7.8	5459373	DB04715	306.362	306.148	4	C18H18N4O	IMIDAZOPYRIDAZIN 1	experimental	experimental
3651	dbank_003651	-7.8	456214	DB04751	388.894	388.178	6	C19H25ClN6O	Purvalanol A	experimental	experimental
3656	dbank_003656	-7.8	5289109	DB04759	374.436	374.174	4	C22H22N4O2	PYRIMIDINE-4,6-DICARBOXYLIC ACID BIS-(3-METHYL-BENZYLAMIDE)	experimental	experimental
3665	dbank_003665	-7.8	4369502	DB04770	355.434	355.201	6	C19H25N5O2	O6-(R)-ROSCOVITINE, R-2-(6-BENZYLOXY-9-ISOPROPYL-9H-PURIN-2-YLAMINO)-BUTAN-1-OL	experimental	experimental
3682	dbank_003682	-7.8	5326926	DB04792	382.413	382.164	8	C20H22N4O4	2,5-O,O-BIS-{4',4''-AMIDINOPHENYL}-1,4:3,6-DIANHYDRO-D-SORBITOL	experimental	experimental
3753	dbank_003753	-7.8	151194	DB04879	346.813	346.099	4	C20H15ClN4	Vatalanib	investigational	investigational
3817	dbank_003817	-7.8	466151	DB05100	423.506	423.092	6	C18H21N3O5S2	Prinomastat	investigational	investigational
3864	dbank_003864	-7.8	12000240	DB05408	569.51	569.179	7	C26H27F4N3O7	Emricasan	investigational	investigational
3960	dbank_003960	-7.8	11270783	DB05936	446.434	446.168	4	C21H21F3N6O2	CVT-6883	investigational	investigational
3969	dbank_003969	-7.8	9946267	DB05973	348.29	348.038	9	C10H12N4O8S	Inosine 5'-sulfate	investigational	investigational
3976	dbank_003976	-7.8	44224257	DB06040	420.48	420.143	4	C20H22F2N4O2S	Filanesib	investigational	investigational
3981	dbank_003981	-7.8	25147644	DB06090	361.445	361.179	3	C22H23N3O2	Bradanicline	investigational	investigational
4033	dbank_004033	-7.8	9875401	DB06228	435.881	435.066	5	C19H18ClN3O5S	Rivaroxaban	approved	approved
4037	dbank_004037	-7.8	471161	DB06234	376.23	375.075	6	C15H19Cl2N3O4	Maribavir	investigational	investigational
4043	dbank_004043	-7.8	5472495	DB06246	372.41	372.083	4	C20H17FO4S	Exisulind	investigational	investigational
4057	dbank_004057	-7.8	216235	DB06268	454.905	454.006	6	C18H15ClN2O6S2	Sitaxentan	approved; investigational; withdrawn	approved	investigational	withdrawn
4060	dbank_004060	-7.8	6918336	DB06276	410.91	410.074	3	C23H19ClO3S	Tanomastat	investigational	investigational
4078	dbank_004078	-7.8	12136798	DB06334	390.418	390.149	4	C22H19FN4O2	Tucidinostat	investigational	investigational
4082	dbank_004082	-7.8	11569967	DB06347	451.55	451.25	7	C24H30FN7O	Cenisertib	investigational	investigational
4119	dbank_004119	-7.8	123618	DB06457	324.403	324.175	4	C19H21FN4	Tecastemizole	investigational	investigational
4169	dbank_004169	-7.8	10113978	DB06589	437.518	437.163	7	C21H23N7O2S	Pazopanib	approved	approved
4178	dbank_004178	-7.8	115358	DB06608	463.501	463.208	5	C24H28F3N3O3	Tafenoquine	approved; investigational	approved	investigational
4190	dbank_004190	-7.8	9910224	DB06629	424.44	424.095	8	C19H16N6O4S	Zibotentan	investigational	investigational
4207	dbank_004207	-7.8	10152654	DB06670	525.56	525.171	5	C25H27F4N3O3S	Odanacatib	investigational	investigational
4218	dbank_004218	-7.8	64715	DB06693	390.52	390.241	3	C23H34O5	Mevastatin	experimental	experimental
4247	dbank_004247	-7.8	2361	DB06732	272.297	272.084	2	C19H12O2	beta-Naphthoflavone	experimental	experimental
4290	dbank_004290	-7.8	148121	DB06813	477.473	477.176	11	C23H23N7O5	Pralatrexate	approved; investigational	approved	investigational
4321	dbank_004321	-7.8	25113614	DB06853	399.53	399.263	5	C22H33N5O2	N-cycloheptylglycyl-N-(4-carbamimidoylbenzyl)-L-prolinamide	experimental	experimental
4322	dbank_004322	-7.8	445849	DB06856	381.443	381.185	4	C22H24FN3O2	6-FLUORO-2-[2-HYDROXY-3-(2-METHYL-CYCLOHEXYLOXY)-PHENYL]-1H-INDOLE-5-CARBOXAMIDINE	experimental	experimental
4337	dbank_004337	-7.8	134111	DB06873	382.41	382.153	5	C21H22N2O5	1-((2-HYDROXYETHOXY)METHYL)-5-(3-(BENZYLOXY)BENZYL)PYRIMIDINE-2,4(1H,3H)-DIONE	experimental	experimental
4392	dbank_004392	-7.8	17754396	DB06932	334.372	334.143	6	C19H18N4O2	10,11-dimethoxy-4-methyldibenzo[c,f]-2,7-naphthyridine-3,6-diamine	experimental	experimental
4410	dbank_004410	-7.8	25246329	DB06955	454.262	453.028	4	C22H13Cl2N3O4	3,4-bis(7-chloro-1H-indol-3-yl)-1H-pyrrole-2,5-dicarboxylic acid	experimental	experimental
4431	dbank_004431	-7.8	25138295	DB06985	392.372	392.135	3	C20H19F3N2O3	2-[({4-[2-(trifluoromethyl)phenyl]piperidin-1-yl}carbonyl)amino]benzoic acid	experimental	experimental
4453	dbank_004453	-7.8	9969613	DB07008	374.35	374.102	5	C20H14N4O4	4-(1,3-BENZODIOXOL-5-YLOXY)-2-[4-(1H-IMIDAZOL-1-YL)PHENOXY]PYRIMIDINE	experimental	experimental
4482	dbank_004482	-7.8	25023705	DB07041	428.486	428.196	6	C24H24N6O2	N-[2-(2,4-diaminopyrido[2,3-d]pyrimidin-7-yl)-2-methylpropyl]-4-phenoxybenzamide	experimental	experimental
4485	dbank_004485	-7.8	25195347	DB07045	441.269	440.077	9	C17H18Cl2N6O4	(2R,3R,4S,5R)-2-[6-amino-8-[(3,4-dichlorophenyl)methylamino]purin-9-yl]-5-(hydroxymethyl)oxolane-3,4-diol	experimental	experimental
4489	dbank_004489	-7.8	24812720	DB07049	417.522	417.172	5	C21H27N3O4S	(2R)-1-[(4-tert-butylphenyl)sulfonyl]-2-methyl-4-(4-nitrophenyl)piperazine	experimental	experimental
4503	dbank_004503	-7.8	6857690	DB07064	324.417	324.184	2	C20H24N2O2	(4R)-4-(3-HYDROXYPHENYL)-N,N,7,8-TETRAMETHYL-3,4-DIHYDROISOQUINOLINE-2(1H)-CARBOXAMIDE	experimental	experimental
4516	dbank_004516	-7.8	23661697	DB07081	421.34	421.134	4	C17H17F6N5O	(2R)-4-[(8R)-8-METHYL-2-(TRIFLUOROMETHYL)-5,6-DIHYDRO[1,2,4]TRIAZOLO[1,5-A]PYRAZIN-7(8H)-YL]-4-OXO-1-(2,4,5-TRIFLUOROPHENYL)BUTAN-2-AMINE	experimental	experimental
4523	dbank_004523	-7.8	24963035	DB07088	372.461	372.216	5	C20H28N4O3	(S)-N-(4-carbamimidoylbenzyl)-1-(2-(cyclopentyloxy)ethanoyl)pyrrolidine-2-carboxamide	experimental	experimental
4562	dbank_004562	-7.8	25134248	DB07131	384.515	384.253	4	C22H32N4O2	(S)-N-(4-carbamimidoylbenzyl)-1-(3-cyclohexylpropanoyl)pyrrolidine-2-carboxamide	experimental	experimental
4567	dbank_004567	-7.8	3038525	DB07138	436.262	434.981	4	C19H9Cl2F2N3OS	Neflamapimod	investigational	investigational
4617	dbank_004617	-7.8	11710963	DB07193	395.399	395.092	4	C18H16F3N3O2S	(2R,3R)-7-(methylsulfonyl)-3-(2,4,5-trifluorophenyl)-1,2,3,4-tetrahydropyrido[1,2-a]benzimidazol-2-amine	experimental	experimental
4632	dbank_004632	-7.8	10339710	DB07210	380.241	379.043	4	C18H14BrN5	3-bromo-5-phenyl-N-(pyridin-4-ylmethyl)pyrazolo[1,5-a]pyrimidin-7-amine	experimental	experimental
4634	dbank_004634	-7.8	6852140	DB07212	319.357	319.132	4	C19H17N3O2	N-(7-CARBAMIMIDOYL-NAPHTHALEN-1-YL)-3-HYDROXY-2-METHYL-BENZAMIDE	experimental	experimental
4642	dbank_004642	-7.8	6920596	DB07222	334.84	334.145	2	C18H23ClN2O2	(3S)-N-(5-CHLORO-2-METHYLPHENYL)-1-CYCLOHEXYL-5-OXOPYRROLIDINE-3-CARBOXAMIDE	experimental	experimental
4674	dbank_004674	-7.8	11602832	DB07257	354.787	354.077	3	C19H15ClN2O3	4-(2-chlorophenyl)-8-(2-hydroxyethyl)-6-methylpyrrolo[3,4-e]indole-1,3(2H,6H)-dione	experimental	experimental
4708	dbank_004708	-7.8	445460	DB07294	399.455	399.185	4	C23H26FNO4	3-fluoro-4-[2-hydroxy-2-(5,5,8,8-tetramethyl-5,6,7,8,-tetrahydro-naphtalen-2-yl)-acetylamino]-benzoic acid	experimental	experimental
4761	dbank_004761	-7.8	5280443	DB07352	270.237	270.053	5	C15H10O5	Apigenin	experimental	experimental
4769	dbank_004769	-7.8	24880024	DB07360	464.487	464.07	5	C19H15F3N6OS2	1-{5-[2-(thieno[3,2-d]pyrimidin-4-ylamino)ethyl]-1,3-thiazol-2-yl}-3-[3-(trifluoromethyl)phenyl]urea	experimental	experimental
4775	dbank_004775	-7.8	17749728	DB07369	455.957	455.107	4	C23H22ClN3O3S	N-(3-chlorophenyl)-N-methyl-2-oxo-3-[(3,4,5-trimethyl-1H-pyrrol-2-yl)methyl]-2H-indole-5-sulfonamide	experimental	experimental
4783	dbank_004783	-7.8	6914609	DB07379	403.909	403.189	7	C19H26ClN7O	(2S)-2-({6-[(3-Amino-5-chlorophenyl)amino]-9-isopropyl-9H-purin-2-yl}amino)-3-methyl-1-butanol	experimental	experimental
4831	dbank_004831	-7.8	46937074	DB07434	457.437	457.16	7	C21H23N5O7	HONH-BENZYLMALONYL-L-ALANYLGLYCINE-P-NITROANILIDE	experimental	experimental
4832	dbank_004832	-7.8	5287739	DB07435	304.339	304.11	3	C20H16O3	1,2,3-TRIHYDROXY-1,2,3,4-TETRAHYDROBENZO[A]PYRENE	experimental	experimental
4881	dbank_004881	-7.8	5287845	DB07493	341.159	339.985	3	C16H9BrN2O2	5-Bromoindirubin	experimental	experimental
4893	dbank_004893	-7.8	446805	DB07508	419.499	419.142	5	C22H21N5O2S	4-(5-BENZENESULFONYLAMINO-1-METHYL-1H-BENZOIMIDAZOL-2-YLMETHYL)-BENZAMIDINE	experimental	experimental
4928	dbank_004928	-7.8	16224058	DB07546	376.412	376.165	6	C20H20N6O2	[1-(6-{6-[(1-methylethyl)amino]-1H-indazol-1-yl}pyrazin-2-yl)-1H-pyrrol-3-yl]acetic acid	experimental	experimental
5006	dbank_005006	-7.8	11197931	DB07638	318.315	318.107	3	C18H16F2O3	(3AS,4R,9BR)-2,2-DIFLUORO-4-(4-HYDROXYPHENYL)-1,2,3,3A,4,9B-HEXAHYDROCYCLOPENTA[C]CHROMEN-8-OL	experimental	experimental
5018	dbank_005018	-7.8	9547919	DB07651	483.402	483.137	6	C21H24F2N3O6P	N-ACETYL-L-PHENYLALANYL-4-[DIFLUORO(PHOSPHONO)METHYL]-L-PHENYLALANINAMIDE	experimental	experimental
5020	dbank_005020	-7.8	30281577	DB07653	345.351	345.111	5	C20H15N3O3	N-(5,6-DIPHENYLFURO[2,3-D]PYRIMIDIN-4-YL)GLYCINE	experimental	experimental
5054	dbank_005054	-7.8	650361	DB07697	454.517	454.087	7	C19H22N2O7S2	1-(2,3-dihydro-1,4-benzodioxin-6-ylsulfonyl)-4-[(4-methoxyphenyl)sulfonyl]piperazine	experimental	experimental
5108	dbank_005108	-7.8	25210531	DB07760	346.295	346.091	8	C15H14N4O6	3-[(1E,7E)-8-(2,6-dioxo-1,2,3,6-tetrahydropyrimidin-4-yl)-3,6-dioxa-2,7-diazaocta-1,7-dien-1-yl]benzoic acid	experimental	experimental
5124	dbank_005124	-7.8	5494422	DB07779	383.459	383.201	3	C22H26FN3O2	N-({(2S)-1-[(3R)-3-AMINO-4-(2-FLUOROPHENYL)BUTANOYL]PYRROLIDIN-2-YL}METHYL)BENZAMIDE	experimental	experimental
5159	dbank_005159	-7.8	4447	DB07816	384.43	384.159	6	C23H20N4O2	N-(P-CYANOPHENYL)-N'-DIPHENYLMETHYL-GUANIDINE-ACETIC ACID	experimental	experimental
5174	dbank_005174	-7.8	10200651	DB07833	394.425	394.143	4	C24H18N4O2	N-(3-cyanophenyl)-2'-methyl-5'-(5-methyl-1,3,4-oxadiazol-2-yl)-4-biphenylcarboxamide	experimental	experimental
5179	dbank_005179	-7.8	6420159	DB07839	436.547	436.247	5	C25H32N4O3	N~2~-1,3-BENZOXAZOL-2-YL-3-CYCLOHEXYL-N-{2-[(4-METHOXYPHENYL)AMINO]ETHYL}-L-ALANINAMIDE	experimental	experimental
5218	dbank_005218	-7.8	24836811	DB07879	368.41	368.094	4	C18H16N4O3S	N-hydroxy-5-[(3-phenyl-5,6-dihydroimidazo[1,2-a]pyrazin-7(8H)-yl)carbonyl]thiophene-2-carboxamide	experimental	experimental
5225	dbank_005225	-7.8	66440	DB07891	372.455	372.194	4	C22H28O5	4-{[(14beta,17alpha)-3-hydroxyestra-1,3,5(10)-trien-17-yl]oxy}-4-oxobutanoic acid	experimental	experimental
5234	dbank_005234	-7.8	2740174	DB07901	324.807	324.114	4	C18H17ClN4	5-CHLORO-6-METHYL-N-(2-PHENYLETHYL)-2-PYRIDIN-2-YLPYRIMIDIN-4-AMINE	experimental	experimental
5240	dbank_005240	-7.8	444394	DB07909	381.465	381.194	4	C23H27NO4	(1S,2S,5S)2-(4-GLUTARIDYLBENZYL)-5-PHENYL-1-CYCLOHEXANOL	experimental	experimental
5268	dbank_005268	-7.8	448167	DB07940	414.283	414.059	2	C20H19IN2	9-(3-IODOBENZYLAMINO)-1,2,3,4-TETRAHYDROACRIDINE	experimental	experimental
5293	dbank_005293	-7.8	11464526	DB07967	428.49	428.207	7	C23H24N8O	9-CYCLOPENTYL-6-[2-(3-IMIDAZOL-1-YL-PROPOXY)-PHENYLAMINO]-9H-PURINE-2-CARBONITRILE	experimental	experimental
5308	dbank_005308	-7.8	16741228	DB07984	428.909	428.15	5	C23H25ClN2O4	2-[1-(4-chlorobenzoyl)-5-methoxy-2-methyl-1H-indol-3-yl]-n-[(1S)-1-(hydroxymethyl)propyl]acetamide	experimental	experimental
5322	dbank_005322	-7.8	11494891	DB07999	393.325	393.015	8	C16H11NO9S	{4-[(CARBOXYMETHOXY)CARBONYL]-3,3-DIOXIDO-1-OXONAPHTHO[1,2-D]ISOTHIAZOL-2(1H)-YL}ACETIC ACID	experimental	experimental
5324	dbank_005324	-7.8	449162	DB08001	425.388	425.111	7	C22H19NO8	5-(3-{3-[3-HYDROXY-2-(METHOXYCARBONYL)PHENOXY]PROPENYL}PHENYL)-4-(HYDROXYMETHYL)ISOXAZOLE-3-CARBOXYLIC ACID	experimental	experimental
5327	dbank_005327	-7.8	16129582	DB08005	398.889	398.162	4	C20H23ClN6O	4-{[5-chloro-4-(1H-indol-3-yl)pyrimidin-2-yl]amino}-N-ethylpiperidine-1-carboxamide	experimental	experimental
5347	dbank_005347	-7.8	24801863	DB08026	365.432	365.196	6	C19H23N7O	2-{4-[(4-imidazo[1,2-a]pyridin-3-ylpyrimidin-2-yl)amino]piperidin-1-yl}-N-methylacetamide	experimental	experimental
5383	dbank_005383	-7.8	46937120	DB08068	445.914	445.157	5	C23H25ClFN3O3	N-[4-CHLORO-3-(PYRIDIN-3-YLOXYMETHYL)-PHENYL]-3-FLUORO-	experimental	experimental
5404	dbank_005404	-7.8	5326870	DB08092	339.363	339.138	3	C19H18FN3O2	3-fluoro-N-1H-indol-5-yl-5-morpholin-4-ylbenzamide	experimental	experimental
5436	dbank_005436	-7.8	5288711	DB08125	398.459	398.051	5	C18H14N4O3S2	4-{[(2-Oxo-1,2-dihydro-3H-indol-3-ylidene)methyl]amino}-N-(1,3-thiazol-2-yl)benzenesulfonamide	experimental	experimental
5451	dbank_005451	-7.8	24864082	DB08141	349.335	349.135	4	C16H17F2N5O2	4-{[(2,6-difluorophenyl)carbonyl]amino}-N-[(3S)-piperidin-3-yl]-1H-pyrazole-3-carboxamide	experimental	experimental
5457	dbank_005457	-7.8	510684	DB08147	387.428	387.147	5	C24H21NO4	4-[3-(dibenzylamino)phenyl]-2,4-dioxobutanoic acid	experimental	experimental
5468	dbank_005468	-7.8	25195339	DB08158	348.238	348.061	9	C12H13FN2O9	2,4-DINITROPHENYL 2-DEOXY-2-FLUORO-BETA-D-MANNOPYRANOSIDE	experimental	experimental
5496	dbank_005496	-7.8	11544170	DB08191	314.337	314.106	3	C20H14N2O2	4-(5-phenyl-1H-pyrrolo[2,3-b]pyridin-3-yl)benzoic acid	experimental	experimental
5537	dbank_005537	-7.8	23400214	DB08242	358.397	358.154	5	C20H18N6O	N,4-dimethyl-3-[(1-phenyl-1H-pyrazolo[3,4-d]pyrimidin-4-yl)amino]benzamide	experimental	experimental
5540	dbank_005540	-7.8	11840968	DB08246	328.356	328.139	1	C19H18F2N2O	(2S)-4-(2,5-DIFLUOROPHENYL)-N,N-DIMETHYL-2-PHENYL-2,5-DIHYDRO-1H-PYRROLE-1-CARBOXAMIDE	experimental	experimental
5543	dbank_005543	-7.8	23586165	DB08250	386.438	386.192	3	C21H24F2N4O	(5S)-5-(3-AMINOPROPYL)-3-(2,5-DIFLUOROPHENYL)-N-ETHYL-5-PHENYL-4,5-DIHYDRO-1H-PYRAZOLE-1-CARBOXAMIDE	experimental	experimental
5623	dbank_005623	-7.8	16750094	DB08350	372.42	372.159	4	C22H20N4O2	5-[3-(2-METHOXYPHENYL)-1H-PYRROLO[2,3-B]PYRIDIN-5-YL]-N,N-DIMETHYLPYRIDINE-3-CARBOXAMIDE	experimental	experimental
5636	dbank_005636	-7.8	11691442	DB08365	476.708	474.993	4	C20H15BrClN3O4	8-bromo-4-(2-chlorophenyl)-N-(2-hydroxyethyl)-6-methyl-1,3-dioxo-1,2,3,6-tetrahydropyrrolo[3,4-e]indole-7-carboxamide	experimental	experimental
5650	dbank_005650	-7.8	11516136	DB08382	366.409	366.198	6	C17H24F2N6O	Gosogliptin	investigational	investigational
5655	dbank_005655	-7.8	11581936	DB08387	392.452	392.164	4	C25H20N4O	2-{[4-(1-methyl-4-pyridin-4-yl-1H-pyrazol-3-yl)phenoxy]methyl}quinoline	experimental	experimental
5657	dbank_005657	-7.8	15991588	DB08389	401.458	401.174	6	C24H23N3O3	6,7-DIMETHOXY-4-[(3R)-3-(2-NAPHTHYLOXY)PYRROLIDIN-1-YL]QUINAZOLINE	experimental	experimental
5671	dbank_005671	-7.8	446744	DB08406	367.407	367.155	7	C21H17N7	[N-(2,4-DIAMINOPTERIDIN-6-YL)-METHYL]-DIBENZ[B,F]AZEPINE	experimental	experimental
5672	dbank_005672	-7.8	6857724	DB08407	441.474	441.179	7	C24H27NO7	PLATENSIMYCIN	experimental	experimental
5783	dbank_005783	-7.8	10249180	DB08535	380.241	379.043	4	C18H14BrN5	3-bromo-5-phenyl-N-(pyridin-3-ylmethyl)pyrazolo[1,5-a]pyrimidin-7-amine	experimental	experimental
5784	dbank_005784	-7.8	10317619	DB08536	380.241	379.043	4	C18H14BrN5	3-bromo-5-phenyl-N-(pyrimidin-5-ylmethyl)pyrazolo[1,5-a]pyridin-7-amine	experimental	experimental
5796	dbank_005796	-7.8	5327153	DB08549	419.452	419.115	5	C19H21N3O6S	(3R)-METHYLCARBAMOYL-7-SULFOAMINO-3,4-DIHYDRO-1H-ISOQUINOLINE-2-CARBOXYLIC ACID BENZYL ESTER	experimental	experimental
5848	dbank_005848	-7.8	24836810	DB08613	423.409	423.086	4	C19H16F3N3O3S	2,2,2-TRIFLUORO-1-{5-[(3-PHENYL-5,6-DIHYDROIMIDAZO[1,2-A]PYRAZIN-7(8H)-YL)CARBONYL]THIOPHEN-2-YL}ETHANE-1,1-DIOL	experimental	experimental
5866	dbank_005866	-7.8	214347	DB08639	329.398	329.164	5	C20H19N5	Dapivirine	investigational	investigational
5890	dbank_005890	-7.8	54689025	DB08664	452.5	452.195	4	C25H28N2O6	({3-[1-(4-HYDROXY-2-OXO-2H-CHROMEN-3-YL)-PROPYL]-PHENYLCARBAMOYL}-METHYL)-CARBAMIC ACID TERT-BUTYL ESTER	experimental	experimental
5921	dbank_005921	-7.8	4177750	DB08701	411.249	410.027	4	C20H15BrN2O3	2-(3-BROMOPHENYL)-6-[(2-HYDROXYETHYL)AMINO]-1H-BENZO[DE]ISOQUINOLINE-1,3(2H)-DIONE	experimental	experimental
5926	dbank_005926	-7.8	16049839	DB08706	374.386	374.074	5	C18H15FN2O4S	(2S)-({(5Z)-5-[(5-Ethyl-2-furyl)methylene]-4-oxo-4,5-dihydro-1,3-thiazol-2-yl}amino)(4-fluorophenyl)acetic acid	experimental	experimental
5960	dbank_005960	-7.8	10247560	DB08741	354.403	354.169	7	C19H22N4O3	5-[[(2R)-2-cyclopropyl-7,8-dimethoxy-2H-chromen-5-yl]methyl]pyrimidine-2,4-diamine	experimental	experimental
5964	dbank_005964	-7.8	446345	DB08745	475.003	474.149	5	C23H27ClN4O3S	4-[[(1E)-2-(4-CHLOROPHENYL)ETHENYL]SULFONYL]-1-[[1-(4-PYRIDINYL)-4-PIPERIDINYL]METHYL]PIPERAZINONE	experimental	experimental
5980	dbank_005980	-7.8	5492457	DB08762	478.432	478.151	6	C22H27N2O8P	O-(((1R)-((N-PHENYLMETHOXYCARBONYL-L-ALANYL)AMINO)ETHYL)HYDROXYPHOSPHONO)-L-BENZYLACETIC ACID	experimental	experimental
5988	dbank_005988	-7.8	1613	DB08772	419.377	419.055	5	C19H12F3N3O3S	3,4-DIHYDRO-4-OXO-3-((5-TRIFLUOROMETHYL-2-BENZOTHIAZOLYL)METHYL)-1-PHTHALAZINE ACETIC ACID	experimental	experimental
6074	dbank_006074	-7.8	11167602	DB08896	482.815	482.077	3	C21H15ClF4N4O3	Regorafenib	approved	approved
6078	dbank_006078	-7.8	5388906	DB08903	555.505	554.157	4	C32H31BrN2O2	Bedaquiline	approved	approved
6092	dbank_006092	-7.8	73333	DB08927	401.493	401.228	2	C23H29F2N3O	Amperozide	experimental	experimental
6160	dbank_006160	-7.8	5773	DB09008	415.486	415.066	5	C19H17N3O4S2	Cefaloridine	experimental; withdrawn	experimental	withdrawn
6187	dbank_006187	-7.8	11625818	DB09054	415.432	415.156	6	C22H18FN7O	Idelalisib	approved	approved
6235	dbank_006235	-7.8	24775005	DB09143	485.507	485.193	5	C26H26F3N3O3	Sonidegib	approved; investigational	approved	investigational
6259	dbank_006259	-7.8	56640146	DB09183	493.58	493.167	5	C26H27N3O5S	Dasabuvir	approved	approved
6307	dbank_006307	-7.8	119171	DB09235	631.666	631.245	6	C34H38N3O7P	Efonidipine	experimental	experimental
6338	dbank_006338	-7.8	72106	DB09285	395.382	395.146	5	C19H20F3N3O3	Morniflumate	experimental	experimental
6346	dbank_006346	-7.8	31553	DB09298	482.441	482.121	10	C25H22O10	Silibinin	experimental; investigational	experimental	investigational
6405	dbank_006405	-7.8	1712019	DB11115	274.29	274.041	4	C13H10N2O3S	Ensulizole	approved	approved
6501	dbank_006501	-7.8	71777	DB11424	511.15	509.978	3	C17H8Cl2F8N2O3	Lufenuron	experimental; vet_approved	experimental	vet_approved
6587	dbank_006587	-7.8	57164040	DB11618	645.665	645.232	12	C34H35N3O10	Zorubicin	experimental	experimental
6634	dbank_006634	-7.8	46207586	DB11694	488.54	488.143	5	C25H21FN6O2S	Ilorasertib	investigational	investigational
6642	dbank_006642	-7.8	91933867	DB11704	555.638	555.26	4	C32H36F3NO4	Adomeglivant	investigational	investigational
6646	dbank_006646	-7.8	71587743	DB11711	410.47	410.184	5	C23H26N2O5	Navarixin	investigational	investigational
6685	dbank_006685	-7.8	53477157	DB11773	513.37	512.049	7	C21H19Cl2FN4O4S	BMS-903452	investigational	investigational
6688	dbank_006688	-7.8	11442891	DB11778	474.565	474.238	6	C26H30N6O3	Danusertib	investigational	investigational
6699	dbank_006699	-7.8	12001014	DB11792	531.67	531.252	7	C26H37N5O5S	Mirodenafil	investigational	investigational
6736	dbank_006736	-7.8	491941	DB11844	402.49	402.082	5	C18H18N4O3S2	Pritelivir	investigational	investigational
6814	dbank_006814	-7.8	11234052	DB11958	370.384	370.144	4	C19H19FN4O3	Brivanib	investigational	investigational
6856	dbank_006856	-7.8	46926350	DB12021	396.495	396.227	6	C21H28N6O2	Dinaciclib	investigational	investigational
6931	dbank_006931	-7.8	11526696	DB12128	538.664	538.296	5	C30H39FN4O4	Ulimorelin	investigational	investigational
6937	dbank_006937	-7.8	10479502	DB12135	463.31	462.033	5	C17H17Cl2FN4O4S	Elubrixin	investigational	investigational
6990	dbank_006990	-7.8	76958276	DB12219	453	452.203	2	C27H30ClFN2O	GSK-424887	investigational	investigational
7040	dbank_007040	-7.8	53297462	DB12283	494.505	494.213	9	C21H30N6O8	Balapiravir	investigational	investigational
7046	dbank_007046	-7.8	9912771	DB12289	474.561	474.227	6	C27H30N4O4	Darexaban	investigational	investigational
7057	dbank_007057	-7.8	16049404	DB12303	458.606	458.268	4	C28H34N4O2	Motolimod	investigational	investigational
7083	dbank_007083	-7.8	11224409	DB12339	438.463	438.182	6	C22H23FN6O3	Radezolid	investigational	investigational
7086	dbank_007086	-7.8	25025505	DB12345	448.55	448.179	8	C22H24N8OS	MBX-2982	investigational	investigational
7116	dbank_007116	-7.8	25052630	DB12389	401.48	401.137	2	C21H21F2N3OS	Zamicastat	investigational	investigational
7128	dbank_007128	-7.8	9867812	DB12404	439.313	438.069	4	C21H19BrN4O2	Remimazolam	investigational	investigational
7147	dbank_007147	-7.8	9852175	DB12427	628.636	628.265	3	C31H35F7N4O2	Orvepitant	investigational	investigational
7233	dbank_007233	-7.8	10297043	DB12558	440.583	440.269	5	C27H32N6	AEE-788	investigational	investigational
7254	dbank_007254	-7.8	6450813	DB12590	376.43	376.099	4	C20H16N4O2S	Indiplon	investigational	investigational
7273	dbank_007273	-7.8	18376177	DB12623	478.52	478.131	7	C24H22N4O5S	Taprenepag	investigational	investigational
7288	dbank_007288	-7.8	9826744	DB12649	487.4	486.068	6	C23H20Cl2N4O2S	Ibipinabant	investigational	investigational
7309	dbank_007309	-7.8	445117	DB12676	457.44	457.171	11	C20H23N7O6	Modufolin	investigational	investigational
7311	dbank_007311	-7.8	11256720	DB12680	353.44	353.12	5	C19H19N3O2S	Intepirdine	investigational	investigational
7322	dbank_007322	-7.8	10409068	DB12696	406.481	406.212	5	C22H26N6O2	BMS-582949	investigational	investigational
7354	dbank_007354	-7.8	11691242	DB12744	466.339	465.08	4	C22H20BrN5O2	CGI-1842	investigational	investigational
7356	dbank_007356	-7.8	44177328	DB12746	302.341	302.128	5	C17H14N6	AKN-028	investigational	investigational
7391	dbank_007391	-7.8	71750	DB12804	249.273	249.09	3	C15H11N3O	Daniquidone	investigational	investigational
7402	dbank_007402	-7.8	54718618	DB12823	460.328	460.075	3	C21H14F6O5	Tecarfarin	investigational	investigational
7431	dbank_007431	-7.8	24889392	DB12874	560.67	560.221	6	C29H32N6O4S	Quizartinib	investigational	investigational
7507	dbank_007507	-7.8	11538455	DB12985	394.479	394.212	6	C21H26N6O2	Quisinostat	investigational	investigational
7513	dbank_007513	-7.8	11697676	DB12998	430.552	430.237	5	C26H30N4O2	PF-00217830	investigational	investigational
7514	dbank_007514	-7.8	24988948	DB12999	435.27	434.045	4	C21H12Cl2N6O	MK-6186	investigational	investigational
7549	dbank_007549	-7.8	90937527	DB13052	629.82	629.325	7	C32H47N5O6S	Upamostat	investigational	investigational
7551	dbank_007551	-7.8	77050711	DB13055	527.403	527.119	6	C23H16F7N5O2	Oteseconazole	investigational	investigational
7703	dbank_007703	-7.8	5284613	DB13307	530.658	530.288	7	C30H42O8	Proscillaridin	experimental	experimental
7704	dbank_007704	-7.8	33675	DB13308	372.81	372.088	4	C19H17ClN2O4	Oxametacin	experimental	experimental
7772	dbank_007772	-7.8	10219	DB13393	480.649	480.299	6	C29H40N2O4	Emetine	experimental	experimental
7796	dbank_007796	-7.8	25495	DB13422	600.54	600.149	10	C30H24N4O10	Nicofuranose	experimental	experimental
7825	dbank_007825	-7.8	6436055	DB13461	453.49	453.078	7	C17H19N5O6S2	Cefcapene	experimental	experimental
8162	dbank_008162	-7.8	222757	DB13953	376.488	376.204	2	C25H28O3	Estradiol benzoate	approved; investigational; vet_approved	approved	investigational	vet_approved
8188	dbank_008188	-7.8	5281628	DB14008	300.263	300.063	6	C16H12O6	Hispidulin	experimental	experimental
8286	dbank_008286	-7.8	69439	DB14214	973.66	971.499	3	C20H4Cl4I4O5	Rose bengal lactone	experimental	experimental
8329	dbank_008329	-7.8	8269	DB14627	401.418	401.126	3	C24H19NO5	Oxyphenisatin acetate	approved; investigational; withdrawn	approved	investigational	withdrawn
8381	dbank_008381	-7.8	222786	DB14681	360.444	360.194	5	C21H28O5	Cortisone	experimental	experimental
8387	dbank_008387	-7.8	629281	DB14715	465.68	463.977	5	C19H14BrClN2O5	Cinazepam	experimental	experimental
8390	dbank_008390	-7.8	12562545	DB14718	354.211	353.028	4	C16H12BrN5	Pyrazolam	experimental	experimental
8417	dbank_008417	-7.8	46848915	DB14774	428.427	428.14	6	C23H17FN6O2	Balipodect	investigational	investigational
8427	dbank_008427	-7.8	118572065	DB14799	467.34	466.106	5	C22H24Cl2N2O5	PF-06821497	investigational	investigational
8536	dbank_008536	-7.8	3002085	DB15062	587.5	587.12	12	C20H26N7O10PS	Inarigivir	investigational	investigational
8591	dbank_008591	-7.8	71479709	DB15170	429.524	429.216	5	C25H27N5O2	Evobrutinib	investigational	investigational
8597	dbank_008597	-7.8	9936746	DB15189	491.99	491.118	5	C25H22ClN5O2S	Birabresib	investigational	investigational
8611	dbank_008611	-7.8	52951810	DB15208	420.52	420.168	3	C22H26F2N2O2S	NOP-1A	investigational	investigational
8630	dbank_008630	-7.8	91885568	DB15245	498.562	498.218	6	C28H27FN6O2	Olorofim	investigational	investigational
8635	dbank_008635	-7.8	73297272	DB15257	618.53	617.197	6	C30H34Cl2FN5O4	Milademetan	investigational	investigational
8657	dbank_008657	-7.8	59543597	DB15297	603.54	603.137	6	C25H23F6N5O4S	Petesicatib	investigational	investigational
8703	dbank_008703	-7.8	24785538	DB15399	461.495	461.209	7	C23H24FN9O	BMS-754807	investigational	investigational
4	dbank_000004	-7.7	34755	DB00118	398.44	398.137	10	C15H22N6O5S	Ademetionine	approved; investigational; nutraceutical	approved	investigational	nutraceutical
31	dbank_000031	-7.7	5283731	DB00146	400.637	400.334	2	C27H44O2	Calcifediol	approved; nutraceutical	approved	nutraceutical
79	dbank_000079	-7.7	5591	DB00197	441.54	441.161	5	C24H27NO5S	Troglitazone	approved; investigational; withdrawn	approved	investigational	withdrawn
125	dbank_000125	-7.7	441383	DB00251	532.462	531.18	7	C26H31Cl2N5O3	Terconazole	approved	approved
170	dbank_000170	-7.7	150610	DB00303	475.515	475.141	8	C22H25N3O7S	Ertapenem	approved; investigational	approved	investigational
184	dbank_000184	-7.7	43672	DB00319	517.555	517.163	7	C23H27N5O7S	Piperacillin	approved	approved
188	dbank_000188	-7.7	4659569	DB00323	273.241	273.064	5	C14H11NO5	Tolcapone	approved; withdrawn	approved	withdrawn
233	dbank_000233	-7.7	71384	DB00380	268.269	268.117	6	C11H16N4O4	Dexrazoxane	approved; withdrawn	approved	withdrawn
383	dbank_000383	-7.7	126941	DB00563	454.439	454.171	12	C20H22N8O5	Methotrexate	approved	approved
407	dbank_000407	-7.7	6215	DB00591	452.488	452.201	6	C24H30F2O6	Fluocinolone acetonide	approved; investigational; vet_approved	approved	investigational	vet_approved
419	dbank_000419	-7.7	2910	DB00606	389.878	389.027	5	C14H16ClN3O4S2	Cyclothiazide	approved	approved
472	dbank_000472	-7.7	5362065	DB00671	453.45	453.041	10	C16H15N5O7S2	Cefixime	approved; investigational	approved	investigational
500	dbank_000500	-7.7	65016	DB00701	505.627	505.225	6	C25H35N3O6S	Amprenavir	approved; investigational	approved	investigational
577	dbank_000577	-7.7	2540	DB00796	610.671	610.254	8	C33H34N6O6	Candesartan cilexetil	approved	approved
599	dbank_000599	-7.7	2581	DB00821	273.714	273.056	2	C15H12ClNO2	Carprofen	approved; vet_approved; withdrawn	approved	vet_approved	withdrawn
609	dbank_000609	-7.7	5566	DB00831	407.496	407.164	3	C21H24F3N3S	Trifluoperazine	approved; investigational	approved	investigational
732	dbank_000732	-7.7	2267	DB00972	381.898	381.161	3	C22H24ClN3O	Azelastine	approved	approved
780	dbank_000780	-7.7	3823	DB01026	531.431	530.149	6	C26H28Cl2N4O4	Ketoconazole	approved; investigational	approved	investigational
837	dbank_000837	-7.7	439501	DB01092	584.653	584.283	11	C29H44O12	Ouabain	approved	approved
898	dbank_000898	-7.7	5401	DB01162	387.433	387.191	8	C19H25N5O4	Terazosin	approved	approved
933	dbank_000933	-7.7	6000	DB01199	609.731	609.296	5	C37H41N2O6	Tubocurarine	approved	approved
993	dbank_000993	-7.7	32778	DB01289	449.524	449.173	6	C20H27N5O5S	Glisoxepide	investigational	investigational
1018	dbank_001018	-7.7	60921	DB01347	611.431	610.05	4	C25H22BrF3N4O4S	Saprisartan	experimental	experimental
1049	dbank_001049	-7.7	4887	DB01411	481.512	481.175	7	C27H23N5O4	Pranlukast	investigational	investigational
1085	dbank_001085	-7.7	5462328	DB01452	369.411	369.158	4	C21H23NO5	Diamorphine	approved; illicit; investigational	approved	illicit	investigational
1120	dbank_001120	-7.7	37367	DB01489	371.818	371.104	3	C19H18ClN3O3	Camazepam	experimental; illicit	experimental	illicit
1262	dbank_001262	-7.7	17754134	DB01659	267.283	267.101	5	C15H13N3O2	3-(1,10-Phenanthrol-2-Yl)-L-Alanine	experimental	experimental
1263	dbank_001263	-7.7	16019963	DB01661	719.275	719.004	20	C15H25N5O20P4	1-(5-phospho-D-ribosyl)-ATP	experimental	experimental
1286	dbank_001286	-7.7	5288607	DB01691	374.436	374.174	3	C22H22N4O2	Indole Naphthyridinone	experimental	experimental
1349	dbank_001349	-7.7	16500	DB01774	589.342	589.082	16	C16H25N5O15P2	Adenosine-5'-Monophosphate Glucopyranosyl-Monophosphate Ester	experimental	experimental
1378	dbank_001378	-7.7	159296	DB01812	427.201	427.029	12	C10H15N5O10P2	Adenosine-3'-5'-Diphosphate	experimental	experimental
1567	dbank_001567	-7.7	1633	DB02058	335.4	335.163	3	C20H21N3O2	3-[4-(1-formylpiperazin-4-yl)-benzylidenyl]-2-indolinone	experimental	experimental
1580	dbank_001580	-7.7	444833	DB02075	346.233	346.068	9	C11H15N4O7P	[(2R,3R,4S,5S)-3,4-Dihydroxy-5-(4-oxo-4,5-dihydro-1H-pyrrolo[3,2-d]pyrimidin-7-yl)-2-pyrrolidinyl]methyl dihydrogen phosphate	experimental	experimental
1698	dbank_001698	-7.7	444498	DB02230	281.268	281.112	7	C11H15N5O4	Immucillin-G	experimental	experimental
1779	dbank_001779	-7.7	65070	DB02333	468.142	467.974	11	C9H15N2O14P3	Deoxyuridine-5'-Triphosphate	experimental	experimental
1862	dbank_001862	-7.7	6176	DB02431	483.156	482.985	13	C9H16N3O14P3	Cytidine-5'-Triphosphate	experimental	experimental
1926	dbank_001926	-7.7	17754104	DB02511	422.431	422.148	8	C23H22N2O6	2-Hydroxy-5-({1-[(2-Naphthyloxy)Methyl]-3-Oxoprop-1-Enyl}Amino)Tyrosine	experimental	experimental
1953	dbank_001953	-7.7	5326713	DB02545	496.64	496.273	3	C32H36N2O3	Fexaramine	experimental	experimental
1957	dbank_001957	-7.7	445182	DB02549	444.225	444.033	10	C12H18N2O12P2	3'-O-Acetylthymidine-5'-Diphosphate	experimental	experimental
2021	dbank_002021	-7.7	4369343	DB02628	442.594	442.294	4	C25H38N4O3	1-[3,3-Dimethyl-2-(2-Methylamino-Propionylamino)-Butyryl]-Pyrrolidine-2-Carboxylic Acid(1,2,3,4-Tetrahydro-Naphthalen-1-Yl)-Amide	experimental	experimental
2143	dbank_002143	-7.7	449409	DB02790	480.257	480.033	9	C15H18N2O12P2	Phenyl-uridine-5'-diphosphate	experimental	experimental
2153	dbank_002153	-7.7	447923	DB02804	583.674	583.268	7	C34H37N3O6	A-98881	experimental	experimental
2179	dbank_002179	-7.7	448658	DB02834	414.331	414.03	5	C17H10F4N2O4S	IDD552	experimental	experimental
2333	dbank_002333	-7.7	3266379	DB03037	298.247	298.048	6	C16H10O6	Oxidized Acetyl Dithranol	experimental	experimental
2337	dbank_002337	-7.7	17473	DB03041	580.285	580.034	15	C15H22N2O18P2	UDP-alpha-D-glucuronic acid	experimental	experimental
2413	dbank_002413	-7.7	448667	DB03141	598.669	598.189	7	C32H30N4O6S	3-{[(5R,6R)-5-Benzyl-6-hydroxy-2,4-bis(4-hydroxybenzyl)-3-oxo-1,2,4-triazepan-1-yl]sulfonyl}benzonitril	experimental	experimental
2512	dbank_002512	-7.7	4369172	DB03262	457.544	457.044	7	C17H19N3O6S3	Al-6619, [2h-Thieno[3,2-E]-1,2-Thiazine-6-Sulfonamide,2-(3-Hydroxyphenyl)-3-(4-Morpholinyl)-, 1,1-Dioxide]	experimental	experimental
2580	dbank_002580	-7.7	446752	DB03351	331.375	331.155	7	C18H17N7	Sri-9439	experimental	experimental
2585	dbank_002585	-7.7	5288807	DB03358	539.223	539.022	16	C11H20N5O14P3	7-Methyl-7,8-dihydroguanosine 5'-(tetrahydrogen triphosphate)	experimental	experimental
2594	dbank_002594	-7.7	448942	DB03367	428.503	428.119	4	C25H20N2O3S	PF-00356231	experimental	experimental
2600	dbank_002600	-7.7	196672	DB03376	417.398	417.107	12	C13H19N7O7S	5'-O-(N-(Alanyl)sulfamoyl)adenosine	experimental	experimental
2664	dbank_002664	-7.7	439246	DB03467	272.253	272.068	5	C15H12O5	Naringenin	experimental	experimental
2671	dbank_002671	-7.7	1396	DB03477	446.242	444.971	3	C16H11BrF3N3O2S	1-Phenylsulfonamide-3-Trifluoromethyl-5-Parabromophenylpyrazole	experimental	experimental
2684	dbank_002684	-7.7	449165	DB03495	645.605	645.248	19	C25H43NO18	4,6-Dideoxy-4-{[4,5,6-Trihydroxy-3-(Hydroxymethyl)Cyclohex-2-En-1-Yl]Amino}-Alpha-D-Lyxo-Hexopyranosyl-(1->4)-Alpha-D-Threo-Hexopyranosyl-(1->6)-Alpha-L-Threo-Hexopyranose	experimental	experimental
2760	dbank_002760	-7.7	114829	DB03601	256.253	256.074	4	C15H12O4	5-deoxyflavanone	experimental	experimental
2775	dbank_002775	-7.7	4469805	DB03626	311.332	311.116	4	C18H17NO4	5-Methoxy-1,2-Dimethyl-3-(Phenoxymethyl)Indole-4,7-Dione	experimental	experimental
2779	dbank_002779	-7.7	449124	DB03632	675.7	675.298	12	C29H41N9O10	Argifin	experimental	experimental
2805	dbank_002805	-7.7	65374	DB03666	347.221	347.063	8	C10H14N5O7P	Zidovudine monophosphate	experimental	experimental
2871	dbank_002871	-7.7	443210	DB03751	564.329	564.076	13	C16H26N2O16P2	2'deoxy-Thymidine-5'-Diphospho-Alpha-D-Glucose	experimental	experimental
2912	dbank_002912	-7.7	5288994	DB03797	649.442	649.13	15	C21H29N7O13P2	3-Aminomethyl-Pyridinium-Adenine-Dinucleotide	experimental	experimental
2966	dbank_002966	-7.7	445843	DB03865	362.832	362.106	2	C21H17ClN3O	6-Chloro-2-(2-Hydroxy-Biphenyl-3-Yl)-1h-Indole-5-Carboxamidine	experimental	experimental
3049	dbank_003049	-7.7	447998	DB03970	363.411	363.035	6	C15H13N3O4S2	(7R)-7-(6,7-Dihydro-5H-cyclopenta[d]imidazo[2,1-b][1,3]thiazol-2-yl)-2,7-dihydro-1,4-thiazepine-3,6-dicarboxylic acid	experimental	experimental
3114	dbank_003114	-7.7	448610	DB04059	263.297	263.117	5	C15H13N5	8-(Pyrimidin-2-Ylamino)Naphthalene-2-Carboximidamide	experimental	experimental
3160	dbank_003160	-7.7	2353	DB04115	336.361	336.124	4	C20H18NO4	Berberine	approved; investigational	approved	investigational
3175	dbank_003175	-7.7	6830	DB04137	523.18	522.991	14	C10H16N5O14P3	Guanosine-5'-Triphosphate	experimental	experimental
3242	dbank_003242	-7.7	447508	DB04215	344.206	343.032	2	C16H14BrN3O	CRA_9076	experimental	experimental
3340	dbank_003340	-7.7	5488645	DB04342	520.473	520.101	12	C20H20N6O9S	7-((Carboxy(4-Hydroxyphenyl)Acetyl)Amino)-7-Methoxy-(3-((1-Methyl-1h-Tetrazol-5-Yl)Thio)Methyl)-8-Oxo-5-Oxa-1-Azabicyclo[4.2.0]Oct-2-Ene-2-Carboxylic Acid	experimental	experimental
3387	dbank_003387	-7.7	4437	DB04409	365.336	364.91	9	C10H5O9S3	Naphthalene Trisulfonate	experimental	experimental
3397	dbank_003397	-7.7	5497056	DB04424	458.552	458.232	5	C27H30N4O3	RPR128515	experimental	experimental
3404	dbank_003404	-7.7	5287512	DB04434	289.334	289.133	5	C17H15N5	Naphthyridine Inhibitor	experimental	experimental
3507	dbank_003507	-7.7	17753799	DB04563	387.207	386.014	5	C17H13BrN3O3	CRA_9678	experimental	experimental
3510	dbank_003510	-7.7	8582	DB04566	348.206	348.047	9	C10H13N4O8P	Inosinic Acid	experimental	experimental
3597	dbank_003597	-7.7	5326971	DB04679	529.49	529.201	15	C20H35NO15	Human blood group H type 1 trisaccharide	experimental	experimental
3633	dbank_003633	-7.7	133021	DB04725	379.879	379.134	2	C23H22ClNO2	Licofelone	investigational	investigational
3650	dbank_003650	-7.7	5289081	DB04750	412.297	412.039	7	C21H10F2O7	OREGON GREEN 488 CARBOXYLATE	experimental	experimental
3658	dbank_003658	-7.7	5289111	DB04761	348.359	348.133	6	C18H16N6O2	PYRIMIDINE-4,6-DICARBOXYLIC ACID BIS-[(PYRIDIN-3-YLMETHYL)-AMIDE]	experimental	experimental
3679	dbank_003679	-7.7	9825434	DB04789	459.463	459.187	12	C20H25N7O6	5-methyltetrahydrofolic acid	investigational; nutraceutical	investigational	nutraceutical
3687	dbank_003687	-7.7	5289514	DB04797	322.336	322.123	3	C18H15FN4O	Triazolopyridine	experimental	experimental
3732	dbank_003732	-7.7	213049	DB04850	465.41	465.135	7	C21H21F2N3O7	Posizolid	investigational	investigational
3770	dbank_003770	-7.7	6918248	DB04908	390.402	390.167	3	C20H21F3N4O	Flibanserin	approved; investigational	approved	investigational
3788	dbank_003788	-7.7	158795	DB04954	337.331	337.139	9	C14H19N5O5	Tecadenoson	investigational	investigational
3802	dbank_003802	-7.7	11219835	DB05016	284.242	284.06	4	C15H9FN2O3	Ataluren	approved; investigational	approved	investigational
3813	dbank_003813	-7.7	11973736	DB05075	580.09	579.204	7	C33H30ClN5O3	TG-100801	investigational	investigational
3838	dbank_003838	-7.7	16222096	DB05239	531.318	531.063	4	C21H21F3IN3O2	Cobimetinib	approved; investigational	approved	investigational
3855	dbank_003855	-7.7	153948	DB05327	420.189	418.992	4	C17H11BrFN3O4	Ranirestat	investigational	investigational
3879	dbank_003879	-7.7	11567682	DB05454	407.48	407.186	1	C26H24F3N	Paliroden	investigational	investigational
3886	dbank_003886	-7.7	10229498	DB05490	514.209	511.932	3	C21H12Cl4N2O3S	AMG-131	investigational	investigational
3889	dbank_003889	-7.7	11256587	DB05501	349.482	349.227	4	C21H27N5	AMD-070	investigational	investigational
3919	dbank_003919	-7.7	6918218	DB05659	397.4	397.083	6	C17H19NO8S	Faropenem medoxomil	investigational	investigational
3922	dbank_003922	-7.7	11561674	DB05676	460.5	460.13	8	C22H24N2O7S	Apremilast	approved; investigational	approved	investigational
4020	dbank_004020	-7.7	159594	DB06199	510.622	510.273	7	C29H38N2O6	Atrasentan	investigational	investigational
4066	dbank_004066	-7.7	3013050	DB06295	659.739	659.303	8	C35H39F2N7O4	Pramiconazole	investigational	investigational
4069	dbank_004069	-7.7	11955716	DB06306	409.53	409.237	5	C24H31N3O3	Onalespib	investigational	investigational
4085	dbank_004085	-7.7	213043	DB06358	354.41	354.169	7	C19H22N4O3	Iclaprim	investigational	investigational
4092	dbank_004092	-7.7	128919	DB06393	381.442	381.17	1	C24H22F3N	Xaliproden	investigational	investigational
4135	dbank_004135	-7.7	3038517	DB06494	667.73	667.206	5	C36H31F2N5O4S	Sufugolix	investigational	investigational
4139	dbank_004139	-7.7	206044	DB06510	516.55	516.19	6	C29H28N2O7	Muraglitazar	investigational	investigational
4162	dbank_004162	-7.7	6918324	DB06578	391.82	391.099	4	C20H19ClFNO4	Tonabersat	investigational	investigational
4173	dbank_004173	-7.7	6918339	DB06597	351.46	351.15	4	C18H25NO4S	Estradiol sulfamate	investigational	investigational
4239	dbank_004239	-7.7	9577124	DB06721	447.491	447.179	6	C25H25N3O5	Gimatecan	investigational	investigational
4324	dbank_004324	-7.7	46937030	DB06858	413.556	413.279	5	C23H35N5O2	N-cyclooctylglycyl-N-(4-carbamimidoylbenzyl)-L-prolinamide	experimental	experimental
4346	dbank_004346	-7.7	10915062	DB06883	349.43	349.19	3	C20H23N5O	1-[1-(3-aminophenyl)-3-tert-butyl-1H-pyrazol-5-yl]-3-phenylurea	experimental	experimental
4368	dbank_004368	-7.7	9549225	DB06908	438.903	438.135	4	C24H23ClN2O4	(2S)-3-(1-{[2-(2-CHLOROPHENYL)-5-METHYL-1,3-OXAZOL-4-YL]METHYL}-1H-INDOL-5-YL)-2-ETHOXYPROPANOIC ACID	experimental	experimental
4454	dbank_004454	-7.7	11740318	DB07011	377.436	377.174	5	C22H23N3O3	(3S)-1-(1,3-BENZODIOXOL-5-YLMETHYL)-3-[4-(1H-IMIDAZOL-1-YL)PHENOXY]PIPERIDINE	experimental	experimental
4483	dbank_004483	-7.7	25023706	DB07042	354.41	354.192	7	C17H22N8O	7-amino-2-tert-butyl-4-{[2-(1H-imidazol-4-yl)ethyl]amino}pyrido[2,3-d]pyrimidine-6-carboxamide	experimental	experimental
4524	dbank_004524	-7.7	11995761	DB07089	427.947	427.112	4	C22H22ClN3O2S	N-[amino(imino)methyl]-2-[2-(2-chlorophenyl)-4-(4-propoxyphenyl)-3-thienyl]acetamide	experimental	experimental
4526	dbank_004526	-7.7	24963036	DB07091	386.488	386.232	5	C21H30N4O3	(S)-N-(4-carbamimidoylbenzyl)-1-(2-(cyclohexyloxy)ethanoyl)pyrrolidine-2-carboxamide	experimental	experimental
4600	dbank_004600	-7.7	6914629	DB07174	385.46	385.211	7	C20H27N5O3	6-(2,4-DIAMINO-6-ETHYLPYRIMIDIN-5-YL)-4-(3-METHOXYPROPYL)-2,2-DIMETHYL-2H-1,4-BENZOXAZIN-3(4H)-ONE	experimental	experimental
4601	dbank_004601	-7.7	25138203	DB07175	354.426	354.115	5	C18H18N4O2S	N-{2-methyl-5-[(6-phenylpyrimidin-4-yl)amino]phenyl}methanesulfonamide	experimental	experimental
4635	dbank_004635	-7.7	9956726	DB07215	478.484	478.117	5	C23H21F3N2O4S	2-METHYL-2-(4-{[({4-METHYL-2-[4-(TRIFLUOROMETHYL)PHENYL]-1,3-THIAZOL-5-YL}CARBONYL)AMINO]METHYL}PHENOXY)PROPANOIC ACID	experimental	experimental
4666	dbank_004666	-7.7	5330197	DB07249	470.949	470.172	8	C24H27ClN4O4	N-(5-chloro-1,3-benzodioxol-4-yl)-6-methoxy-7-(3-piperidin-1-ylpropoxy)quinazolin-4-amine	experimental	experimental
4689	dbank_004689	-7.7	11441375	DB07274	414.453	414.158	4	C25H22N2O4	N-cyclopropyl-6-[(6,7-dimethoxyquinolin-4-yl)oxy]naphthalene-1-carboxamide	experimental	experimental
4724	dbank_004724	-7.7	11348631	DB07311	348.784	348.099	5	C16H17ClN4O3	18-CHLORO-11,12,13,14-TETRAHYDRO-1H,10H-8,4-(AZENO)-9,15,1,3,6-BENZODIOXATRIAZACYCLOHEPTADECIN-2-ONE	experimental	experimental
4804	dbank_004804	-7.7	16741245	DB07403	478.87	478.058	5	C19H18ClF3N2O5S	4-[(3-CHLORO-4-{[(2R)-3,3,3-TRIFLUORO-2-HYDROXY-2-METHYLPROPANOYL]AMINO}PHENYL)SULFONYL]-N,N-DIMETHYLBENZAMIDE	experimental	experimental
4835	dbank_004835	-7.7	5287741	DB07439	398.409	398.148	6	C21H22N2O6	1-((2-HYDROXYETHOXY)METHYL)-5-(3-(BENZYLOXY)BENZYL)-6-HYDROXYPYRIMIDINE-2,4(1H,3H)-DIONE	experimental	experimental
4845	dbank_004845	-7.7	445332	DB07451	422.248	421.044	4	C18H17BrFN3O3	1-(5-BROMO-PYRIDIN-2-YL)-3-[2-(6-FLUORO-2-HYDROXY-3-PROPIONYL-PHENYL)-CYCLOPROPYL]-UREA	experimental	experimental
4847	dbank_004847	-7.7	11790	DB07453	272.297	272.084	2	C19H12O2	2-PHENYL-4H-BENZO[H]CHROMEN-4-ONE	experimental	experimental
4916	dbank_004916	-7.7	23647652	DB07533	363.411	363.035	4	C15H13N3O4S2	4-{5-[(Z)-(2-IMINO-4-OXO-1,3-THIAZOLIDIN-5-YLIDENE)METHYL]-2-FURYL}-N-METHYLBENZENESULFONAMIDE	experimental	experimental
4918	dbank_004918	-7.7	11651760	DB07535	254.287	254.117	3	C14H14N4O	2-amino-6-[2-(1H-indol-6-yl)ethyl]pyrimidin-4(3H)-one	experimental	experimental
4921	dbank_004921	-7.7	23647657	DB07538	417.383	417.006	4	C15H10F3N3O4S2	4-{5-[(Z)-(2-IMINO-4-OXO-1,3-THIAZOLIDIN-5-YLIDENE)METHYL]FURAN-2-YL}-2-(TRIFLUOROMETHYL)BENZENESULFONAMIDE	experimental	experimental
4959	dbank_004959	-7.7	24798741	DB07584	291.311	291.123	5	C15H13N7	N-[2-(5-methyl-4H-1,2,4-triazol-3-yl)phenyl]-7H-pyrrolo[2,3-d]pyrimidin-4-amine	experimental	experimental
4964	dbank_004964	-7.7	11840934	DB07589	485.52	485.16	6	C22H26F3N3O4S	N-[1-(AMINOMETHYL)CYCLOPROPYL]-3-(BENZYLSULFONYL)-N~2~-[(1S)-2,2,2-TRIFLUORO-1-(4-HYDROXYPHENYL)ETHYL]-L-ALANINAMIDE	experimental	experimental
5010	dbank_005010	-7.7	24978486	DB07643	432.346	431.128	6	C21H23Cl2N5O	5-{[1-(2,3-dichlorobenzyl)piperidin-4-yl]methoxy}quinazoline-2,4-diamine	experimental	experimental
5036	dbank_005036	-7.7	24894167	DB07676	365.383	365.138	6	C20H19N3O4	3-({[(3S)-3,4-dihydroxybutyl]oxy}amino)-1H,2'H-2,3'-biindol-2'-one	experimental	experimental
5045	dbank_005045	-7.7	23586146	DB07686	387.459	387.148	7	C17H21N7O2S	4-{[5-(CYCLOHEXYLAMINO)[1,2,4]TRIAZOLO[1,5-A]PYRIMIDIN-7-YL]AMINO}BENZENESULFONAMIDE	experimental	experimental
5049	dbank_005049	-7.7	25210493	DB07692	460.472	460.057	6	C18H18F2N2O6S2	1-[(2,6-difluorophenyl)sulfonyl]-4-(2,3-dihydro-1,4-benzodioxin-6-ylsulfonyl)piperazine	experimental	experimental
5103	dbank_005103	-7.7	445953	DB07755	448.346	447.123	7	C21H23Cl2N5O2	(2S)-1-[4-({4-[(2,5-Dichlorophenyl)amino]-2-pyrimidinyl}amino)phenoxy]-3-(dimethylamino)-2-propanol	experimental	experimental
5155	dbank_005155	-7.7	24963048	DB07812	362.448	362.12	3	C20H18N4OS	N-[(1S)-2-amino-1-phenylethyl]-5-(1H-pyrrolo[2,3-b]pyridin-4-yl)thiophene-2-carboxamide	experimental	experimental
5171	dbank_005171	-7.7	16040279	DB07830	392.372	392.135	4	C20H19F3N2O3	(4R,5R)-5-AMINO-1-[2-(1,3-BENZODIOXOL-5-YL)ETHYL]-4-(2,4,5-TRIFLUOROPHENYL)PIPERIDIN-2-ONE	experimental	experimental
5214	dbank_005214	-7.7	11979006	DB07875	490.935	490.088	5	C22H20ClFN4O4S	5-Chloro-thiophene-2-carboxylic acid ((3S,4S)-1-{[2-fluoro-4-(2-oxo-2H-pyridin-1-yl)-phenylcarbamoyl]-methyl}-4-hydroxy-pyrrolidin-3-yl)-amide	experimental	experimental
5262	dbank_005262	-7.7	448953	DB07934	466.617	466.249	5	C22H36N5O4S	[[CYCLOHEXANESULFONYL-GLYCYL]-3[PYRIDIN-4-YL-AMINOMETHYL]ALANYL]PIPERIDINE	experimental	experimental
5266	dbank_005266	-7.7	44141864	DB07938	354.403	354.169	7	C19H22N4O3	(S)-iclaprim	experimental	experimental
5302	dbank_005302	-7.7	15942657	DB07976	371.382	371.063	4	C19H14FNO4S	3-{[(3-FLUORO-3'-METHOXYBIPHENYL-4-YL)AMINO]CARBONYL}THIOPHENE-2-CARBOXYLIC ACID	experimental	experimental
5355	dbank_005355	-7.7	9562794	DB08034	336.341	336.111	5	C19H16N2O4	(E)-3,4-DIHYDROXY-N'-[(2-METHOXYNAPHTHALEN-1-YL)METHYLENE]BENZOHYDRAZIDE	experimental	experimental
5375	dbank_005375	-7.7	46937119	DB08057	406.911	406.167	5	C22H23ClN6	N-(2-chloro-6-methylphenyl)-8-[(3S)-3-methylpiperazin-1-yl]imidazo[1,5-a]quinoxalin-4-amine	experimental	experimental
5377	dbank_005377	-7.7	312145	DB08059	428.432	428.147	5	C23H24O8	Wortmannin	experimental	experimental
5441	dbank_005441	-7.7	25023709	DB08130	475.207	475.012	5	C16H13F3IN5O	N-(5-{3,4-difluoro-2-[(2-fluoro-4-iodophenyl)amino]phenyl}-1,3,4-oxadiazol-2-yl)ethane-1,2-diamine	experimental	experimental
5491	dbank_005491	-7.7	9547945	DB08184	249.31	249.127	2	C16H15N3	2-(2-METHYLPHENYL)-1H-INDOLE-5-CARBOXIMIDAMIDE	experimental	experimental
5514	dbank_005514	-7.7	5288850	DB08213	400.448	400.109	5	C20H20N2O5S	1-METHYL-5-(2-PHENOXYMETHYL-PYRROLIDINE-1-SULFONYL)-1H-INDOLE-2,3-DIONE	experimental	experimental
5591	dbank_005591	-7.7	6852201	DB08309	488.603	488.221	9	C23H32N6O4S	3-({2-[(4-{[6-(CYCLOHEXYLMETHOXY)-9H-PURIN-2-YL]AMINO}PHENYL)SULFONYL]ETHYL}AMINO)PROPAN-1-OL	experimental	experimental
5628	dbank_005628	-7.7	44129603	DB08355	321.333	321.123	6	C17H15N5O2	1-methyl-8-(phenylamino)-4,5-dihydro-1H-pyrazolo[4,3-h]quinazoline-3-carboxylic acid	experimental	experimental
5632	dbank_005632	-7.7	24779677	DB08360	348.405	348.181	7	C18H20N8	2-(4-ETHYLPIPERAZIN-1-YL)-4-(PHENYLAMINO)PYRAZOLO[1,5-A][1,3,5]TRIAZINE-8-CARBONITRILE	experimental	experimental
5633	dbank_005633	-7.7	11493841	DB08361	340.423	340.201	6	C18H24N6O	2-{[(1R,2S)-2-aminocyclohexyl]amino}-4-[(3-methylphenyl)amino]pyrimidine-5-carboxamide	experimental	experimental
5637	dbank_005637	-7.7	16086836	DB08366	443.49	443.194	7	C24H29NO7	3-({3-[(1S,4aS,6S,7S,9S,9aR)-1,6-dimethyl-2-oxodecahydro-6,9-epoxy-4a,7-methanobenzo[7]annulen-1-yl]propanoyl}amino)-2,4-dihydroxybenzoic acid	experimental	experimental
5661	dbank_005661	-7.7	1587957	DB08393	331.368	331.132	4	C20H17N3O2	2-[(5,6-DIPHENYLFURO[2,3-D]PYRIMIDIN-4-YL)AMINO]ETHANOL	experimental	experimental
5748	dbank_005748	-7.7	24883486	DB08497	366.324	366.085	5	C19H14N2O6	(1S)-2-oxo-1-phenyl-2-[(1,3,4-trioxo-1,2,3,4-tetrahydroisoquinolin-5-yl)amino]ethyl acetate	experimental	experimental
5751	dbank_005751	-7.7	46937156	DB08500	347.362	347.137	7	C18H21NO6	(3S,5R,7R,8S,9S,10R)-7-(hydroxymethyl)-3-(2-naphthyl)-1,6-dioxa-2-azaspiro[4.5]decane-8,9,10-triol	experimental	experimental
5768	dbank_005768	-7.7	9822610	DB08519	406.438	406.175	8	C21H22N6O3	N~4~-(3-methyl-1H-indazol-6-yl)-N~2~-(3,4,5-trimethoxyphenyl)pyrimidine-2,4-diamine	experimental	experimental
5790	dbank_005790	-7.7	446129	DB08543	395.538	395.257	5	C24H33N3O2	1-[2-HYDROXY-3-(4-CYCLOHEXYL-PHENOXY)-PROPYL]-4-(2-PYRIDYL)-PIPERAZINE	experimental	experimental
5849	dbank_005849	-7.7	5289460	DB08614	488.481	488.134	6	C20H23F3N4O5S	3-[[(METHYLAMINO)SULFONYL]AMINO]-2-OXO-6-PHENYL-N-[3,3,3-TRIFLUORO-1-(1-METHYLETHYL)-2-OXOPHENYL]-1(2H)-PYRIDINE ACETAMIDE	experimental	experimental
5885	dbank_005885	-7.7	14611919	DB08659	330.362	330.079	4	C15H14N4O3S	2-(hydrazinocarbonyl)-3-phenyl-1H-indole-5-sulfonamide	experimental	experimental
5961	dbank_005961	-7.7	11269429	DB08742	394.546	394.251	3	C26H34O3	1,3-CYCLOHEXANEDIOL, 4-METHYLENE-5-[(2E)-[(1S,3AS,7AS)-OCTAHYDRO-1-(5-HYDROXY-5-METHYL-1,3-HEXADIYNYL)-7A-METHYL-4H-INDEN-4-YLIDENE]ETHYLIDENE]-, (1R,3S,5Z)	experimental	experimental
5962	dbank_005962	-7.7	6914643	DB08743	393.442	393.191	6	C20H23N7O2	2-({8-[(3R)-3-AMINOPIPERIDIN-1-YL]-1,3-DIMETHYL-2,6-DIOXO-1,2,3,6-TETRAHYDRO-7H-PURIN-7-YL}METHYL)BENZONITRILE	experimental	experimental
6102	dbank_006102	-7.7	54677972	DB08942	335.335	335.058	5	C14H13N3O5S	Isoxicam	approved; withdrawn	approved	withdrawn
6124	dbank_006124	-7.7	3407	DB08968	401.887	401.151	4	C21H24ClN3O3	Fominoben	experimental; withdrawn	experimental	withdrawn
6131	dbank_006131	-7.7	10617	DB08975	302.329	302.094	3	C20H14O3	Florantyrone	withdrawn	withdrawn
6132	dbank_006132	-7.7	3360	DB08976	406.355	406.114	5	C20H17F3N2O4	Floctafenine	approved; withdrawn	approved	withdrawn
6169	dbank_006169	-7.7	2451	DB09017	393.689	391.95	3	C15H10BrClN4S	Brotizolam	investigational; withdrawn	investigational	withdrawn
6183	dbank_006183	-7.7	11567473	DB09047	398.394	398.139	8	C20H19FN4O4	Finafloxacin	approved; investigational	approved	investigational
6205	dbank_006205	-7.7	11504295	DB09080	386.448	386.184	6	C21H26N2O5	Olodaterol	approved	approved
6271	dbank_006271	-7.7	20055414	DB09195	405.469	405.214	4	C21H26F3N5	Lorpiprazole	approved	approved
6274	dbank_006274	-7.7	9826451	DB09198	480.54	480.147	7	C24H24N4O5S	Lobeglitazone	experimental	experimental
6276	dbank_006276	-7.7	3055168	DB09200	397.45	397.11	5	C20H19N3O4S	Rivoglitazone	experimental; investigational	experimental	investigational
6302	dbank_006302	-7.7	65948	DB09230	582.657	582.248	7	C33H34N4O6	Azelnidipine	investigational	investigational
6310	dbank_006310	-7.7	4008	DB09238	610.711	610.279	7	C35H38N4O6	Manidipine	approved; investigational	approved	investigational
6569	dbank_006569	-7.7	10237	DB11562	367.352	367.106	6	C20H17NO6	Bicuculline	experimental	experimental
6628	dbank_006628	-7.7	6445539	DB11686	348.49	348.22	2	C23H28N2O	Iferanserin	investigational	investigational
6662	dbank_006662	-7.7	15981397	DB11739	345.39	345.095	4	C17H16FN3O2S	Vonoprazan	investigational	investigational
6668	dbank_006668	-7.7	2320	DB11748	466.45	466.108	8	C19H23N4O6PS	Benfotiamine	approved; experimental	approved	experimental
6678	dbank_006678	-7.7	59174488	DB11764	423.448	423.171	7	C22H22FN5O3	Spebrutinib	investigational	investigational
6690	dbank_006690	-7.7	15547703	DB11781	406.479	406.21	5	C21H30N2O6	Tosedostat	investigational	investigational
6713	dbank_006713	-7.7	46871935	DB11814	419.91	419.14	5	C24H22ClN3O2	PF-03882845	investigational	investigational
6755	dbank_006755	-7.7	54767229	DB11873	348.42	348.093	4	C20H16N2O2S	Verinurad	investigational	investigational
6773	dbank_006773	-7.7	11462174	DB11900	348.377	348.127	3	C21H17FN2O2	OC-459	investigational	investigational
6774	dbank_006774	-7.7	24872560	DB11901	477.44	477.088	4	C21H15F4N5O2S	Apalutamide	approved; investigational	approved	investigational
6790	dbank_006790	-7.7	24780598	DB11922	441.9	441.093	5	C19H21ClFN3O4S	Danirixin	investigational	investigational
6817	dbank_006817	-7.7	23582824	DB11962	333.37	333.057	4	C18H11N3O2S	GSK-1059615	investigational	investigational
6827	dbank_006827	-7.7	25166913	DB11978	374.448	374.186	4	C21H22N6O	Glasdegib	approved; investigational	approved	investigational
6851	dbank_006851	-7.7	23582412	DB12011	426.41	426.086	5	C19H17F3N2O4S	Fevipiprant	investigational	investigational
6859	dbank_006859	-7.7	107985	DB12025	360.406	360.157	5	C20H24O6	Triptolide	investigational	investigational
6867	dbank_006867	-7.7	24795088	DB12041	462.489	462.193	4	C25H26F4N2O2	Mapracorat	investigational	investigational
6905	dbank_006905	-7.7	25181577	DB12095	574.99	574.171	7	C27H26ClF3N6O3	Telotristat ethyl	approved; investigational	approved	investigational
6922	dbank_006922	-7.7	65064	DB12116	458.372	458.085	10	C22H18O11	Epigallocatechin gallate	investigational	investigational
6930	dbank_006930	-7.7	444022	DB12127	594.65	594.145	8	C25H30N4O9S2	Sultamicillin	approved; investigational	approved	investigational
6938	dbank_006938	-7.7	9827968	DB12137	518.584	518.162	7	C27H26N4O5S	GSK-256066	investigational	investigational
6940	dbank_006940	-7.7	10297982	DB12140	456.425	456.141	6	C23H19F3N4O3	Dilmapimod	investigational	investigational
6945	dbank_006945	-7.7	67462786	DB12147	446.555	446.243	7	C25H30N6O2	Erdafitinib	approved; investigational	approved	investigational
6963	dbank_006963	-7.7	24756910	DB12174	434.496	434.195	7	C24H26N4O4	CUDC-101	investigational	investigational
7014	dbank_007014	-7.7	51039095	DB12247	463.582	463.258	6	C26H33N5O3	AZD-4547	investigational	investigational
7034	dbank_007034	-7.7	78357816	DB12275	399.346	399.121	5	C18H17F4N3O3	Seviteronel	investigational	investigational
7045	dbank_007045	-7.7	24815904	DB12288	312.325	312.111	4	C17H16N2O4	Piromelatine	investigational	investigational
7084	dbank_007084	-7.7	44129648	DB12341	418.512	418.206	2	C26H27FN2O2	LY-2456302	investigational	investigational
7136	dbank_007136	-7.7	56842069	DB12414	572.628	572.229	3	C34H31F3N2O3	Usistapide	investigational	investigational
7142	dbank_007142	-7.7	9868980	DB12420	462.59	462.252	5	C28H34N2O4	Diazepinomicin	investigational	investigational
7211	dbank_007211	-7.7	45270144	DB12524	501.51	501.199	7	C25H26F3N5O3	BI-671800	investigational	investigational
7229	dbank_007229	-7.7	91488	DB12553	412.43	412.17	6	C21H26F2O6	Fluocinolone	investigational	investigational
7236	dbank_007236	-7.7	16102897	DB12563	486.85	486.097	3	C22H19ClF4N2O4	MK-0686	investigational	investigational
7325	dbank_007325	-7.7	49871973	DB12705	453.539	453.226	7	C25H31N3O5	Cenerimod	investigational	investigational
7377	dbank_007377	-7.7	9889200	DB12781	395.43	395.094	5	C20H17N3O4S	Balaglitazone	investigational	investigational
7393	dbank_007393	-7.7	17747460	DB12806	641.3	640.354	5	C39H49ClN4O2	GSK-1004723	investigational	investigational
7432	dbank_007432	-7.7	17751090	DB12875	422.451	422.161	2	C25H21F3N2O	Mavatrep	investigational	investigational
7477	dbank_007477	-7.7	84098	DB12938	359.32	359.044	4	C15H12F3NO4S	Isoxaflutole	approved; experimental; investigational	approved	experimental	investigational
7530	dbank_007530	-7.7	46944259	DB13022	444.32	443.092	5	C21H19Cl2N5O2	LY-2874455	investigational	investigational
7540	dbank_007540	-7.7	123879	DB13036	416.47	416.121	4	C21H21FN2O4S	Ramatroban	investigational	investigational
7575	dbank_007575	-7.7	10114	DB13089	470.694	470.34	4	C30H46O4	Enoxolone	investigational	investigational
7598	dbank_007598	-7.7	54718859	DB13119	371.368	371.128	5	C19H18FN3O4	GSK-364735	investigational	investigational
7639	dbank_007639	-7.7	28871	DB13217	329.8	329.028	3	C17H12ClNO2S	Fentiazac	experimental	experimental
7644	dbank_007644	-7.7	22875828	DB13223	390.451	390.184	5	C22H27FO5	Fluocortin	experimental	experimental
7662	dbank_007662	-7.7	93154	DB13246	304.437	304.194	2	C21H24N2	Quinupramine	approved	approved
7674	dbank_007674	-7.7	6410758	DB13266	462.5	462.078	8	C18H18N6O5S2	Cefatrizine	experimental	experimental
7721	dbank_007721	-7.7	4814	DB13327	376.416	376.154	5	C21H20N4O3	Picotamide	experimental	experimental
7827	dbank_007827	-7.7	36846	DB13463	319.404	319.157	2	C21H21NO2	Oxetorone	experimental	experimental
7864	dbank_007864	-7.7	4888	DB13514	255.269	255.09	3	C15H13NO3	Pranoprofen	experimental; investigational	experimental	investigational
8121	dbank_008121	-7.7	76962649	DB13856	447.32	446.106	5	C21H25Cl2FO5	Fluclorolone	experimental	experimental
8151	dbank_008151	-7.7	44200882	DB13939	393.83	393.099	6	C20H16ClN5O2	RAD-140	experimental; investigational	experimental	investigational
8185	dbank_008185	-7.7	124081896	DB13997	571.55	571.122	8	C27H23F2N3O7S	Baloxavir marboxil	approved; investigational	approved	investigational
8212	dbank_008212	-7.7	9865808	DB14059	401.79	401.021	3	C16H11ClF3N3O2S	SC-236	experimental; investigational	experimental	investigational
8219	dbank_008219	-7.7	213040	DB14067	481.596	481.237	5	C30H31N3O3	Dofequidar	experimental; investigational	experimental	investigational
8322	dbank_008322	-7.7	11823650	DB14584	328.452	328.204	3	C21H28O3	Segesterone	experimental	experimental
8338	dbank_008338	-7.7	43860	DB14636	400.284	400.09	10	C13H17N6O7P	Triciribine phosphate	investigational	investigational
8358	dbank_008358	-7.7	443928	DB14657	434.504	434.21	5	C24H31FO6	Paramethasone acetate	approved	approved
8443	dbank_008443	-7.7	9838389	DB14849	273.244	273.064	5	C14H11NO5	Nebicapone	investigational	investigational
8447	dbank_008447	-7.7	46840946	DB14856	500.34	498.974	5	C18H12Cl2FN5O3S2	PF-05089771	investigational	investigational
8452	dbank_008452	-7.7	25190990	DB14866	539.7	539.235	4	C31H33N5O2S	Amcasertib	investigational	investigational
8484	dbank_008484	-7.7	11527519	DB14929	629.28	626.943	5	C24H17BrCl2FN3O5S	Elsulfavirine	investigational	investigational
8494	dbank_008494	-7.7	72188743	DB14942	561.63	561.114	7	C27H23N5O5S2	BMS-986141	investigational	investigational
8564	dbank_008564	-7.7	9976892	DB15120	377.488	377.21	3	C23H27N3O2	GSK-239512	investigational	investigational
8577	dbank_008577	-7.7	118414016	DB15143	361.373	361.144	5	C18H20FN3O4	PF-06650833	investigational	investigational
8583	dbank_008583	-7.7	24769037	DB15152	422.442	422.191	8	C18H26N6O6	TMC-649128	investigational	investigational
8589	dbank_008589	-7.7	71228883	DB15168	586.85	585.063	7	C28H22Cl3N3O5	Cilofexor	investigational	investigational
8592	dbank_008592	-7.7	54576693	DB15173	410.81	410.096	5	C18H17ClF2N4O3	JNJ-42165279	investigational	investigational
8608	dbank_008608	-7.7	216208	DB15205	505.619	505.269	6	C28H35N5O4	Capromorelin	investigational	investigational
8610	dbank_008610	-7.7	25052023	DB15207	466.48	466.117	4	C22H21F3N2O4S	Esaxerenone	investigational	investigational
8623	dbank_008623	-7.7	71577426	DB15232	571.58	571.161	8	C26H24F3N7O3S	Telaglenastat	investigational	investigational
8639	dbank_008639	-7.7	25161177	DB15266	506.29	505.01	7	C17H12Cl2F3N7O2S	TAK-580	investigational	investigational
8640	dbank_008640	-7.7	72696796	DB15268	485.433	485.135	6	C23H24N3O7P	Afabicin	investigational	investigational
8670	dbank_008670	-7.7	23106477	DB15325	500.63	500.144	6	C25H28N2O5S2	ONO-8539	investigational	investigational
8688	dbank_008688	-7.7	90409366	DB15358	440.79	440.078	5	C18H13ClF4N6O	JNJ-54175446	investigational	investigational
8707	dbank_008707	-7.7	57520598	DB15406	485	484.122	4	C25H25ClN2O4S	GLPG-0974	investigational	investigational
8771	dbank_008771	-7.7	6452099	DB15590	396.395	396.121	6	C22H20O7	beta-Apopicropodophyllin	experimental	experimental
63	dbank_000063	-7.6	71398	DB00179	302.365	302.152	4	C18H22O4	Masoprocol	approved; investigational	approved	investigational
64	dbank_000064	-7.6	82153	DB00180	434.498	434.21	6	C24H31FO6	Flunisolide	approved; investigational	approved	investigational
158	dbank_000158	-7.6	443958	DB00288	502.572	502.237	6	C28H35FO7	Amcinonide	approved	approved
191	dbank_000191	-7.6	3715	DB00328	357.788	357.077	4	C19H16ClNO4	Indomethacin	approved; investigational	approved	investigational
211	dbank_000211	-7.6	8226	DB00353	339.431	339.195	3	C20H25N3O2	Methylergometrine	approved	approved
212	dbank_000212	-7.6	6729	DB00354	433.028	432.233	2	C28H33ClN2	Buclizine	approved	approved
256	dbank_000256	-7.6	3964	DB00408	327.808	327.114	3	C18H18ClN3O	Loxapine	approved	approved
281	dbank_000281	-7.6	446156	DB00439	459.55	459.242	6	C26H34FNO5	Cerivastatin	approved; withdrawn	approved	withdrawn
360	dbank_000360	-7.6	4011971	DB00537	331.341	331.133	6	C17H18FN3O3	Ciprofloxacin	approved; investigational	approved	investigational
433	dbank_000433	-7.6	3372	DB00623	437.522	437.175	4	C22H26F3N3OS	Fluphenazine	approved	approved
474	dbank_000474	-7.6	6918365	DB00673	534.427	534.15	5	C23H21F7N4O3	Aprepitant	approved; investigational	approved	investigational
503	dbank_000503	-7.6	5625	DB00705	456.561	456.194	6	C22H28N6O3S	Delavirdine	approved	approved
524	dbank_000524	-7.6	441290	DB00728	529.774	529.401	4	C32H53N2O4	Rocuronium	approved	approved
580	dbank_000580	-7.6	3341	DB00800	305.756	305.082	4	C16H16ClNO3	Fenoldopam	approved	approved
581	dbank_000581	-7.6	31640	DB00801	352.738	352.059	2	C17H12ClF3N2O	Halazepam	approved; illicit; withdrawn	approved	illicit	withdrawn
666	dbank_000666	-7.6	5556	DB00897	343.21	342.044	3	C17H12Cl2N4	Triazolam	approved; investigational	approved	investigational
692	dbank_000692	-7.6	43507	DB00923	519.554	519.099	10	C20H21N7O6S2	Ceforanide	approved	approved
699	dbank_000699	-7.6	54682461	DB00932	602.664	602.206	5	C31H33F3N2O5S	Tipranavir	approved; investigational	approved	investigational
713	dbank_000713	-7.6	656511	DB00948	539.582	539.114	8	C21H25N5O8S2	Mezlocillin	approved; investigational	approved	investigational
782	dbank_000782	-7.6	3749	DB01029	428.529	428.232	5	C25H28N6O	Irbesartan	approved; investigational	approved	investigational
874	dbank_000874	-7.6	11876263	DB01134	414.586	414.277	3	C26H38O4	Desoxycorticosterone pivalate	experimental; vet_approved	experimental	vet_approved
902	dbank_000902	-7.6	55283	DB01167	705.633	704.239	9	C35H38Cl2N8O4	Itraconazole	approved; investigational	approved	investigational
976	dbank_000976	-7.6	443884	DB01253	325.405	325.179	3	C19H23N3O2	Ergometrine	approved	approved
981	dbank_000981	-7.6	4369359	DB01261	407.314	407.118	4	C16H15F6N5O	Sitagliptin	approved; investigational	approved	investigational
1035	dbank_001035	-7.6	5875	DB01384	392.461	392.2	5	C22H29FO5	Paramethasone	experimental	experimental
1123	dbank_001123	-7.6	13765	DB01493	288.467	288.245	1	C20H32O	Ethylestrenol	withdrawn	withdrawn
1207	dbank_001207	-7.6	154059	DB01591	362.473	362.199	2	C23H26N2O2	Solifenacin	approved	approved
1234	dbank_001234	-7.6	5311507	DB01624	400.965	400.138	3	C22H25ClN2OS	Zuclopenthixol	approved; investigational	approved	investigational
1243	dbank_001243	-7.6	17754117	DB01634	304.301	304.117	8	C14H16N4O4	2-Oxy-4-Hydroxy-5-(2-Hydrazinopyridine)Phenylalanine	experimental	experimental
1284	dbank_001284	-7.6	1944	DB01689	390.453	390.125	5	C19H22N2O5S	Inhibitor Idd 384	experimental	experimental
1290	dbank_001290	-7.6	440950	DB01697	504.437	504.169	16	C18H32O16	beta-cellotriose	experimental	experimental
1303	dbank_001303	-7.6	19235	DB01713	536.276	536.044	13	C14H22N2O16P2	UDP-alpha-D-xylose	experimental	experimental
1308	dbank_001308	-7.6	657131	DB01720	438.271	437.026	3	C22H16BrNO4	(2z)-2-(Benzoylamino)-3-[4-(2-Bromophenoxy)Phenyl]-2-Propenoic Acid	experimental	experimental
1374	dbank_001374	-7.6	656949	DB01807	368.87	368.14	2	C20H21ClN4O	N-[(3Z)-5-Tert-butyl-2-phenyl-1,2-dihydro-3H-pyrazol-3-ylidene]-N'-(4-chlorophenyl)urea	experimental	experimental
1419	dbank_001419	-7.6	65562	DB01860	491.182	491.001	13	C10H16N5O12P3	Cordycepin Triphosphate	experimental	experimental
1420	dbank_001420	-7.6	8629	DB01861	566.302	566.055	14	C15H24N2O17P2	Uridine diphosphate glucose	experimental	experimental
1561	dbank_001561	-7.6	5111	DB02049	425.883	425.07	5	C19H20ClNO6S	2-{4-[4-(4-Chloro-Phenoxy)-Benzenesulfonyl]-Tetrahydro-Pyran-4-Yl}-N-Hydroxy-Acetamide	experimental	experimental
1568	dbank_001568	-7.6	447048	DB02059	559.316	559.072	15	C15H23N5O14P2	Adenosine-5-Diphosphoribose	experimental	experimental
1614	dbank_001614	-7.6	107971	DB02115	416.382	416.111	9	C21H20O9	Daidzin	experimental	experimental
1748	dbank_001748	-7.6	5287541	DB02292	309.338	309.067	4	C14H15NO5S	Irosustat	investigational	investigational
1761	dbank_001761	-7.6	5289588	DB02309	365.214	365.049	8	C10H14N4O9P	5-monophosphate-9-beta-D-ribofuranosyl xanthine	experimental	experimental
1771	dbank_001771	-7.6	5288499	DB02322	573.438	572.94	17	C12H15NO19S3	Heparin Disaccharide I-S	experimental	experimental
1778	dbank_001778	-7.6	447369	DB02331	550.452	549.057	3	C29H21Cl2NO4S	(2s)-2-[(5-Benzofuran-2-Yl-Thiophen-2-Ylmethyl)-(2,4-Dichloro-Benzoyl)-Amino]-3-Phenyl-Propionic Acid	experimental	experimental
1784	dbank_001784	-7.6	5884	DB02338	745.421	745.091	18	C21H30N7O17P3	Nadph Dihydro-Nicotinamide-Adenine-Dinucleotidephosphate	experimental	experimental
1788	dbank_001788	-7.6	66414	DB02342	302.408	302.188	3	C19H26O3	2-Methoxyestradiol	investigational	investigational
1798	dbank_001798	-7.6	445076	DB02358	433.375	433.135	11	C17H19N7O7	LY374571	experimental	experimental
1803	dbank_001803	-7.6	165230	DB02363	507.181	506.996	14	C10H16N5O13P3	2'-Monophosphoadenosine-5'-Diphosphate	experimental	experimental
1824	dbank_001824	-7.6	447873	DB02388	513.505	512.222	5	C27H34Cl2N6	Cyclohexyl-{4-[5-(3,4-Dichlorophenyl)-2-Piperidin-4-Yl-3-Propyl-3h-Imidazol-4-Yl]-Pyrimidin-2-Yl}Amine	experimental	experimental
1832	dbank_001832	-7.6	447733	DB02398	318.372	318.148	4	C19H18N4O	6-[N-(4-(Aminomethyl)Phenyl)Carbamyl]-2-Naphthalenecarboxamidine	experimental	experimental
1834	dbank_001834	-7.6	4470790	DB02400	356.329	356.101	6	C18H16N2O6	5-Methoxy-1,2-Dimethyl-3-(4-Nitrophenoxymethyl)Indole-4,7-Dione	experimental	experimental
1858	dbank_001858	-7.6	447021	DB02427	339.392	339.17	7	C18H21N5O2	2,4-Diamino-6-[N-(2',5'-Dimethoxybenzyl)-N-Methylamino]Quinazoline	experimental	experimental
1886	dbank_001886	-7.6	1507	DB02463	252.291	252.114	2	C15H14N3O	2-(2-Hydroxy-Phenyl)-1h-Indole-5-Carboxamidine	experimental	experimental
1938	dbank_001938	-7.6	6076	DB02527	329.206	329.053	8	C10H12N5O6P	Cyclic adenosine monophosphate	experimental	experimental
1965	dbank_001965	-7.6	448249	DB02558	400.491	400.146	4	C21H24N2O4S	N-(3-Phenyl-2-Sulfanylpropanoyl)Phenylalanylalanine	experimental	experimental
1973	dbank_001973	-7.6	461279	DB02569	384.173	384.012	8	C10H14N2O10P2	2',3'-Dehydro-2',3'-Deoxy-Thymidine 5'-Diphosphate	experimental	experimental
2011	dbank_002011	-7.6	447339	DB02616	369.467	369.083	6	C16H15N7S2	FR117016	experimental	experimental
2016	dbank_002016	-7.6	445420	DB02621	421.55	421.192	4	C22H31NO5S	Latrunculin A	experimental	experimental
2018	dbank_002018	-7.6	444148	DB02623	442.216	442.04	12	C10H16N6O10P2	Aminophosphonic acid-guanylate ester	experimental	experimental
2052	dbank_002052	-7.6	446837	DB02668	575.718	575.245	5	C32H37N3O5S	JE-2147	experimental	experimental
2071	dbank_002071	-7.6	447261	DB02694	477.363	477.126	12	C16H24N5O10P	Pantoyl Adenylate	experimental	experimental
2087	dbank_002087	-7.6	337359	DB02712	236.199	236.06	3	C11H9FN2O3	Sorbinil	experimental; investigational	experimental	investigational
2121	dbank_002121	-7.6	171284	DB02759	582.554	582.206	12	C26H34N2O13	4-methyl-umbelliferyl-N-acetyl-chitobiose	experimental	experimental
2191	dbank_002191	-7.6	5740	DB02848	422.5	422.141	7	C22H22N4O3S	{4-[3-(6,7-Diethoxy-Quinazolin-4-Ylamino)-Phenyl]-Thiazol-2-Yl}-Methanol	experimental	experimental
2341	dbank_002341	-7.6	5289529	DB03046	344.388	344.094	6	C16H16N4O3S	7-Methoxy-8-[1-(Methylsulfonyl)-1h-Pyrazol-4-Yl]Naphthalene-2-Carboximidamide	experimental	experimental
2358	dbank_002358	-7.6	449144	DB03069	535.291	535.06	14	C14H23N3O15P2	Cytidine-5'-diphospho-beta-D-xylose	experimental	experimental
2437	dbank_002437	-7.6	447478	DB03173	335.4	335.163	3	C20H21N3O2	CRA_10433	experimental	experimental
2443	dbank_002443	-7.6	447271	DB03181	367.398	367.153	4	C20H21N3O4	2-[4-(4-Hydroxy-3-Isopropyl-Phenoxy)-3,5-Dimethyl-Phenyl]-2h-[1,2,4]Triazine-3,5-Dione	experimental	experimental
2461	dbank_002461	-7.6	1024	DB03205	330.206	330.012	9	C14H6N2O8	Pyrroloquinoline Quinone	experimental	experimental
2463	dbank_002463	-7.6	444698	DB03207	393.456	393.103	4	C22H19NO4S	2-(Biphenyl-4-Sulfonyl)-1,2,3,4-Tetrahydro-Isoquinoline-3-Carboxylic Acid	experimental	experimental
2507	dbank_002507	-7.6	135548	DB03256	473.439	473.166	12	C20H23N7O7	(6R)-Folinic acid	experimental	experimental
2579	dbank_002579	-7.6	168120	DB03349	426.117	424.974	10	C10H13BrN5O7P	8-Bromo-Adenosine-5'-Monophosphate	experimental	experimental
2626	dbank_002626	-7.6	145729	DB03413	388.162	388.007	9	C9H14N2O11P2	Deoxyuridine-5'-Diphosphate	experimental	experimental
2642	dbank_002642	-7.6	6031	DB03435	404.161	404.002	10	C9H14N2O12P2	Uridine-5'-Diphosphate	experimental	experimental
2657	dbank_002657	-7.6	188380	DB03458	381.387	381.176	11	C15H23N7O5	N(4)-Adenosyl-N(4)-methyl-2,4-diaminobutanoic acid	experimental	experimental
2674	dbank_002674	-7.6	1543	DB03480	357.377	357.117	3	C23H16FNO2	Brequinar Analog	experimental	experimental
2694	dbank_002694	-7.6	4470566	DB03507	456.538	456.093	5	C21H20N4O4S2	6-[3-(4-Morpholinyl)Propyl]-2-(3-Nitrophenyl)-5-Thioxo-5,6,-Dihydro-7h-Thienol[2',3':4,5]Pyrrolo[1,2-C]Imidazol-7-One	experimental	experimental
2706	dbank_002706	-7.6	57030	DB03523	375.368	375.107	3	C23H15F2NO2	Brequinar	experimental	experimental
2758	dbank_002758	-7.6	4369171	DB03598	471.571	471.059	7	C18H21N3O6S3	Al-6629, [2h-Thieno[3,2-E]-1,2-Thiazine-6-Sulfonamide,2-(3-Methoxyphenyl)-3-(4-Morpholinyl)-, 1,1-Dioxide]	experimental	experimental
2865	dbank_002865	-7.6	448577	DB03742	463.588	463.182	5	C27H29NO4S	Compound 4-D	experimental	experimental
2887	dbank_002887	-7.6	466960	DB03768	573.744	573.287	6	C30H43N3O6S	N-[2-Hydroxy-2-(8-Isopropyl-6,9-Dioxo-2-Oxa-7,10-Diaza-Bicyclo[11.2.2]Heptadeca-1(16),13(17),14-Trien-11-Yl)-Ethyl]-N-(3-Methyl-Butyl)-Benzenesulfonamide,Inhibitor 3	experimental	experimental
2980	dbank_002980	-7.6	185679	DB03883	386.314	386.107	10	C14H18N4O9	Carboxyethyllumazine	experimental	experimental
3090	dbank_003090	-7.6	447152	DB04023	619.325	619.056	17	C16H23N5O17P2	GDP-alpha-D-mannuronic acid	experimental	experimental
3122	dbank_003122	-7.6	444503	DB04068	390.153	390.003	8	C9H13FN2O10P2	2',3'-dideoxy-3'-fluoro-urididine-5'-diphosphate	experimental	experimental
3180	dbank_003180	-7.6	448660	DB04142	531.215	528.919	4	C19H17Br2NO5S	3-(3,5-Dibromo-4-Hydroxy-Benzoyl)-2-Ethyl-Benzofuran-6-Sulfonic Acid Dimethylamide	experimental	experimental
3232	dbank_003232	-7.6	446665	DB04204	470.289	470.067	6	C18H20F4O6P2	[(4-{4-[4-(Difluoro-Phosphono-Methyl)-Phenyl]-Butyl}-Phenyl)-Difluoro-Methyl]-Phosphonic Acid	experimental	experimental
3345	dbank_003345	-7.6	6675	DB04348	515.703	515.292	7	C26H45NO7S	Taurocholic acid	approved; experimental	approved	experimental
3543	dbank_003543	-7.6	448069	DB04609	596.739	596.246	5	C34H36N4O4S	INHIBITOR Q8467 OF DUPONT MERCK	experimental	experimental
3560	dbank_003560	-7.6	5287728	DB04632	471.544	471.163	5	C24H26FN3O4S	4-(2-HYDROXYBENZYLAMINO)-N-(3-(4-FLUOROPHENOXY)PHENYL)PIPERIDINE-1-SULFONAMIDE	experimental	experimental
3584	dbank_003584	-7.6	9600408	DB04659	407.459	407.071	8	C15H21NO8S2	(1S,2S,3R,4S,5S)-2,3,4-TRIHYDROXY-5-(HYDROXYMETHYL)CYCLOHEXYL (1E)-2-PHENYL-N-(SULFOOXY)ETHANIMIDOTHIOATE	experimental	experimental
3652	dbank_003652	-7.6	5327013	DB04753	373.255	373.068	10	C13H16N3O8P	9-DEAZAINOSINE-2',3'-O-ETHYLIDENEPHOSPHONATE	experimental	experimental
3653	dbank_003653	-7.6	5327012	DB04754	389.258	389.074	12	C12H16N5O8P	GUANOSINE-2',3'-O-ETHYLIDENEPHOSPHONATE	experimental	experimental
3708	dbank_003708	-7.6	4764	DB04824	318.323	318.089	3	C20H14O4	Phenolphthalein	approved; withdrawn	approved	withdrawn
3718	dbank_003718	-7.6	5311399	DB04834	597.904	597.463	3	C37H61N2O4	Rapacuronium	approved; withdrawn	approved	withdrawn
3733	dbank_003733	-7.6	5745206	DB04852	531.687	531.289	3	C35H37N3O2	Implitapide	investigational	investigational
3738	dbank_003738	-7.6	72231	DB04860	316.29	316.048	9	C10H12N4O6S	Isatoribine	investigational	investigational
3740	dbank_003740	-7.6	153241	DB04862	452.46	452.17	5	C23H24N4O6	Merimepodib	investigational	investigational
3789	dbank_003789	-7.6	60939	DB04957	457.96	457.188	5	C23H28ClN5O3	Azimilide	investigational	investigational
3796	dbank_003796	-7.6	164509	DB04982	337.373	337.143	5	C19H19N3O3	Talampanel	investigational	investigational
3797	dbank_003797	-7.6	9875516	DB04983	773.323	773.015	18	C18H27N5O21P4	Denufosol	investigational	investigational
3862	dbank_003862	-7.6	3035442	DB05395	403.9	403.155	4	C22H26ClNO4	Amibegron	investigational	investigational
3897	dbank_003897	-7.6	507806	DB05532	422.441	422.159	6	C22H22N4O5	BMS-488043	investigational	investigational
3991	dbank_003991	-7.6	10073773	DB06140	478.41	477.072	5	C21H24BrN3O3S	SUVN-502	investigational	investigational
4004	dbank_004004	-7.6	124093	DB06160	426.42	426.139	6	C23H20F2N2O4	Garenoxacin	investigational	investigational
4016	dbank_004016	-7.6	134019	DB06193	325.372	325.154	7	C17H19N5O2	Pixantrone	approved; investigational	approved	investigational
4018	dbank_004018	-7.6	160355	DB06195	354.449	354.217	6	C19H26N6O	Seliciclib	investigational	investigational
4029	dbank_004029	-7.6	443894	DB06212	448.941	448.155	3	C26H25ClN2O3	Tolvaptan	approved	approved
4056	dbank_004056	-7.6	6918523	DB06267	516.656	516.252	8	C25H36N6O4S	Udenafil	approved; investigational	approved	investigational
4065	dbank_004065	-7.6	9887712	DB06292	408.873	408.134	6	C21H25ClO6	Dapagliflozin	approved	approved
4075	dbank_004075	-7.6	23648971	DB06321	483.52	483.138	8	C23H22FN5O4S	R-348	investigational	investigational
4087	dbank_004087	-7.6	439035	DB06364	586.7	586.28	8	C34H34N8O2	XR5944	investigational	investigational
4137	dbank_004137	-7.6	37801	DB06499	266.296	266.094	2	C17H14O3	Furaprofen	investigational	investigational
4146	dbank_004146	-7.6	9823294	DB06525	381.476	381.205	5	C22H27N3O3	Ganstigmine	investigational	investigational
4158	dbank_004158	-7.6	9829526	DB06555	454.589	454.242	2	C30H31FN2O	Siramesine	investigational	investigational
4165	dbank_004165	-7.6	457928	DB06581	584.826	584.408	5	C36H56O6	Bevirimat	investigational	investigational
4174	dbank_004174	-7.6	11993740	DB06600	371.437	371.185	7	C20H25N3O4	Nemonoxacin	investigational	investigational
4179	dbank_004179	-7.6	216385	DB06609	324.35	324.067	5	C15H16O6S	Odiparcil	investigational	investigational
4335	dbank_004335	-7.6	9549180	DB06871	282.377	282.162	2	C19H22O2	17-METHYL-17-ALPHA-DIHYDROEQUILENIN	experimental	experimental
4339	dbank_004339	-7.6	6102691	DB06875	279.265	279.07	3	C17H10FNO2	3-(3-FLUORO-4-HYDROXYPHENYL)-7-HYDROXY-1-NAPHTHONITRILE	experimental	experimental
4369	dbank_004369	-7.6	9821178	DB06909	379.455	379.201	5	C21H25N5O2	1-ethyl-N-(phenylmethyl)-4-(tetrahydro-2H-pyran-4-ylamino)-1H-pyrazolo[3,4-b]pyridine-5-carboxamide	experimental	experimental
4379	dbank_004379	-7.6	25011732	DB06919	385.887	385.156	3	C21H24ClN3O2	D-phenylalanyl-N-(3-chlorobenzyl)-L-prolinamide	experimental	experimental
4383	dbank_004383	-7.6	9547939	DB06923	249.31	249.127	2	C16H15N3	2-(3-METHYLPHENYL)-1H-INDOLE-5-CARBOXIMIDAMIDE	experimental	experimental
4402	dbank_004402	-7.6	9933197	DB06945	445.41	445.081	5	C19H18F3NO6S	N-hydroxy-4-({4-[4-(trifluoromethyl)phenoxy]phenyl}sulfonyl)tetrahydro-2H-pyran-4-carboxamide	experimental	experimental
4409	dbank_004409	-7.6	11245700	DB06954	371.472	371.086	5	C16H21NO5S2	2-(cycloheptylmethyl)-1,1-dioxido-1-benzothiophen-6-yl sulfamate	experimental	experimental
4435	dbank_004435	-7.6	11987861	DB06990	346.295	346.091	8	C15H14N4O6	4-[(1E,7E)-8-(2,6-DIOXO-1,2,3,6-TETRAHYDROPYRIMIDIN-4-YL)-3,6-DIOXA-2,7-DIAZAOCTA-1,7-DIEN-1-YL]BENZOIC ACID	experimental	experimental
4461	dbank_004461	-7.6	24768527	DB07019	459.602	459.219	5	C24H33N3O4S	N-[(5R,14R)-5-AMINO-5,14-DIMETHYL-4-OXO-3-OXA-18-AZATRICYCLO[15.3.1.1~7,11~]DOCOSA-1(21),7(22),8,10,17,19-HEXAEN-19-YL]-N-METHYLMETHANESULFONAMIDE	experimental	experimental
4501	dbank_004501	-7.6	961704	DB07061	340.502	340.251	2	C22H32N2O	1-(CYCLOHEXYLAMINO)-3-(6-METHYL-3,4-DIHYDRO-1H-CARBAZOL-9(2H)-YL)PROPAN-2-OL	experimental	experimental
4519	dbank_004519	-7.6	3943211	DB07084	417.452	417.179	7	C22H27NO7	N-(6,7,9,10,17,18,20,21-octahydrodibenzo[b,k][1,4,7,10,13,16]hexaoxacyclooctadecin-2-yl)acetamide	experimental	experimental
4532	dbank_004532	-7.6	9826528	DB07101	482.193	481.995	5	C16H14F3IN2O4	PD-0325901	investigational	investigational
4564	dbank_004564	-7.6	25021183	DB07133	365.469	365.21	3	C22H27N3O2	D-phenylalanyl-N-(3-methylbenzyl)-L-prolinamide	experimental	experimental
4576	dbank_004576	-7.6	24800833	DB07147	420.458	420.169	5	C24H24N2O5	methyl (1R,2S)-2-(hydroxycarbamoyl)-1-{4-[(2-methylquinolin-4-yl)methoxy]benzyl}cyclopropanecarboxylate	experimental	experimental
4583	dbank_004583	-7.6	24808489	DB07156	426.306	425.074	4	C21H20BrN3O2	(4Z)-6-bromo-4-({[4-(pyrrolidin-1-ylmethyl)phenyl]amino}methylidene)isoquinoline-1,3(2H,4H)-dione	experimental	experimental
4586	dbank_004586	-7.6	11213558	DB07159	470.454	470.171	10	C22H23FN6O5	Tamatinib	experimental; investigational	experimental	investigational
4592	dbank_004592	-7.6	46937056	DB07165	492.421	491.095	6	C22H23Cl2N5O2S	N-(5-CHLORO-BENZO[B]THIOPHEN-3-YLMETHYL)-2-[6-CHLORO-OXO-3-(2-PYRIDIN-2-YL-ETHYLAMINO)-2H-PYRAZIN-1-YL]-ACETAMIDE	experimental	experimental
4604	dbank_004604	-7.6	11304412	DB07179	410.267	409.054	4	C19H16BrN5O	3-((3-bromo-5-o-tolylpyrazolo[1,5-a]pyrimidin-7-ylamino)methyl)pyridine 1-oxide	experimental	experimental
4605	dbank_004605	-7.6	11840911	DB07180	329.781	329.093	2	C17H16ClN3O2	5-[(Z)-(5-Chloro-2-oxo-1,2-dihydro-3H-indol-3-ylidene)methyl]-N,2,4-trimethyl-1H-pyrrole-3-carboxamide	experimental	experimental
4606	dbank_004606	-7.6	24832041	DB07181	352.377	352.139	2	C21H18F2N2O	4'-[(1R)-1-amino-2-(2,5-difluorophenyl)ethyl]biphenyl-3-carboxamide	experimental	experimental
4612	dbank_004612	-7.6	6420118	DB07187	324.74	323.997	4	C13H9ClN2O4S	6-[(5-CHLORO-3-METHYL-1-BENZOFURAN-2-YL)SULFONYL]PYRIDAZIN-3(2H)-ONE	experimental	experimental
4616	dbank_004616	-7.6	1116191	DB07192	365.265	364.079	2	C17H21BrN2O2	(3S)-N-(3-BROMOPHENYL)-1-CYCLOHEXYL-5-OXOPYRROLIDINE-3-CARBOXAMIDE	experimental	experimental
4671	dbank_004671	-7.6	25011730	DB07254	433.869	433.061	8	C18H16ClN5O4S	N-[3-[[4-[(5-CHLORO-1,3-BENZODIOXOL-4-YL)AMINO]PYRIMIDIN-2-YL]AMINO]PHENYL]METHANESULFONAMIDE	experimental	experimental
4703	dbank_004703	-7.6	17758920	DB07289	462.314	460.993	6	C20H16BrNO5S	5-[3-(BENZYLAMINO)PHENYL]-4-BROMO-3-(CARBOXYMETHOXY)THIOPHENE-2-CARBOXYLIC ACID	experimental	experimental
4713	dbank_004713	-7.6	44176356	DB07300	365.386	365.149	7	C19H19N5O3	2-(1H-imidazol-1-yl)-9-methoxy-8-(2-methoxyethoxy)benzo[c][2,7]naphthyridin-4-amine	experimental	experimental
4716	dbank_004716	-7.6	11500493	DB07303	306.362	306.148	5	C18H18N4O	N~3~-[3-(5-METHOXYPYRIDIN-3-YL)BENZYL]PYRIDINE-2,3-DIAMINE	experimental	experimental
4745	dbank_004745	-7.6	4369498	DB07333	476.547	476.152	6	C25H24N4O4S	N-(CYCLOPROPYLMETHYL)-4-(METHYLOXY)-3-({5-[3-(3-PYRIDINYL)PHENYL]-1,3-OXAZOL-2-YL}AMINO)BENZENESULFONAMIDE	experimental	experimental
4795	dbank_004795	-7.6	11505541	DB07393	368.411	368.144	2	C24H21N2P	2-(2-PHENYL-3-PYRIDIN-2-YL-4,5,6,7-TETRAHYDRO-2H-ISOPHOSPHINDOL-1-YL)PYRIDINE	experimental	experimental
4888	dbank_004888	-7.6	5287855	DB07503	285.224	284.991	4	C11H5F2NO4S	(5E)-5-[(2,2-DIFLUORO-1,3-BENZODIOXOL-5-YL)METHYLENE]-1,3-THIAZOLIDINE-2,4-DIONE	experimental	experimental
4904	dbank_004904	-7.6	11840930	DB07520	482.493	482.161	6	C19H26F4N4O4S	N-[1-(AMINOMETHYL)CYCLOPROPYL]-3-(MORPHOLIN-4-YLSULFONYL)-N~2~-[(1S)-2,2,2-TRIFLUORO-1-(4-FLUOROPHENYL)ETHYL]-L-ALANINAMIDE	experimental	experimental
4929	dbank_004929	-7.6	9543494	DB07547	398.455	398.039	5	C19H14N2O4S2	5-(4-CYANOPHENYL)-3-{[(2-METHYLPHENYL)SULFONYL]AMINO}THIOPHENE-2-CARBOXYLIC ACID	experimental	experimental
4954	dbank_004954	-7.6	448793	DB07578	372.443	372.104	4	C21H16N4OS	3-[4-(2-METHYL-IMIDAZO[4,5-C]PYRIDIN-1-YL)BENZYL]-3H-BENZOTHIAZOL-2-ONE	experimental	experimental
4958	dbank_004958	-7.6	5327110	DB07583	431.936	431.107	5	C21H22ClN3O3S	(4R,2S)-5'-(4-(4-CHLOROBENZYLOXY)PYRROLIDIN-2-YLMETHANESULFONYL)ISOQUINOLINE	experimental	experimental
4970	dbank_004970	-7.6	11188898	DB07596	404.523	404.177	5	C21H28N2O4S	(17beta)-17-(cyanomethyl)-2-methoxyestra-1(10),2,4-trien-3-yl sulfamate	experimental	experimental
5046	dbank_005046	-7.6	11574606	DB07688	388.444	388.132	7	C17H20N6O3S	4-{[5-(CYCLOHEXYLOXY)[1,2,4]TRIAZOLO[1,5-A]PYRIMIDIN-7-YL]AMINO}BENZENESULFONAMIDE	experimental	experimental
5060	dbank_005060	-7.6	5326930	DB07704	335.36	335.138	5	C18H17N5O2	6-AMINO-4-[2-(4-METHOXYPHENYL)ETHYL]-1,7-DIHYDRO-8H-IMIDAZO[4,5-G]QUINAZOLIN-8-ONE	experimental	experimental
5078	dbank_005078	-7.6	11395145	DB07724	389.422	389.093	6	C19H19NO6S	Indeglitazar	experimental	experimental
5128	dbank_005128	-7.6	448903	DB07783	445.514	445.211	4	C25H27N5O3	1-((1R)-1-(HYDROXYMETHYL)-3-{6-[(3-PHENYLPROPANOYL)AMINO]-1H-INDOL-1-YL}PROPYL)-1H-IMIDAZOLE-4-CARBOXAMIDE	experimental	experimental
5139	dbank_005139	-7.6	5281614	DB07795	286.236	286.048	6	C15H10O6	Fisetin	experimental	experimental
5184	dbank_005184	-7.6	9549258	DB07844	471.978	471.069	5	C19H22ClN3O5S2	6-CHLORO-N-{(3S)-1-[(1S)-1-METHYL-2-MORPHOLIN-4-YL-2-OXOETHYL]-2-OXOPYRROLIDIN-3-YL}-1-BENZOTHIOPHENE-2-SULFONAMIDE	experimental	experimental
5187	dbank_005187	-7.6	6852168	DB07847	465.95	465.113	5	C21H24ClN3O5S	6-CHLORO-N-{(3S)-1-[(1S)-1-METHYL-2-(4-MORPHOLINYL)-2-OXO ETHYL]-2-OXO-3-PYRROLIDINYL}-2-NAPHTHALENESULFONAMIDE	experimental	experimental
5200	dbank_005200	-7.6	9823454	DB07861	420.481	420.114	4	C23H20N2O4S	(2R)-N-hydroxy-3-naphthalen-2-yl-2-[(naphthalen-2-ylsulfonyl)amino]propanamide	experimental	experimental
5257	dbank_005257	-7.6	448258	DB07929	396.479	396.205	4	C23H28N2O4	N-(TERT-BUTYL)-3,5-DIMETHYL-N'-[(5-METHYL-2,3-DIHYDRO-1,4-BENZODIOXIN-6-YL)CARBONYL]BENZOHYDRAZIDE	experimental	experimental
5260	dbank_005260	-7.6	11531308	DB07932	394.374	394.105	5	C22H18O7	dimethyl (1R,4S)-5,6-bis(4-hydroxyphenyl)-7-oxabicyclo[2.2.1]hepta-2,5-diene-2,3-dicarboxylate	experimental	experimental
5306	dbank_005306	-7.6	11270500	DB07982	435.522	435.238	7	C23H29N7O2	2-{4-[4-({4-[2-methyl-1-(1-methylethyl)-1H-imidazol-5-yl]pyrimidin-2-yl}amino)phenyl]piperazin-1-yl}-2-oxoethanol	experimental	experimental
5309	dbank_005309	-7.6	444406	DB07985	352.43	352.19	5	C20H24N4O2	+/-METHYL 4-(AMINOIMINOMETHYL)-BETA-[3- INH (AMINOIMINO)PHENYL]BENZENE PENTANOATE	experimental	experimental
5310	dbank_005310	-7.6	1948	DB07986	374.454	374.13	5	C19H22N2O4S	[4-(4-PHENYL-PIPERIDIN-1-YL)-BENZENESULFONYLAMINO]-ACETIC ACID	experimental	experimental
5323	dbank_005323	-7.6	11660035	DB08000	335.289	335.01	7	C14H9NO7S	2-(CARBOXYMETHYL)-1-OXO-1,2-DIHYDRONAPHTHO[1,2-D]ISOTHIAZOLE-4-CARBOXYLIC ACID 3,3-DIOXIDE	experimental	experimental
5369	dbank_005369	-7.6	16739331	DB08051	419.44	419.182	3	C22H24F3N3O2	(2R)-4-(2-BENZOYL-1,2-DIAZEPAN-1-YL)-4-OXO-1-(2,4,5-TRIFLUOROPHENYL)BUTAN-2-AMINE	experimental	experimental
5374	dbank_005374	-7.6	44422489	DB08056	314.384	314.153	3	C20H18N4	N-(2,6-dimethylphenyl)-5-phenylimidazo[1,5-a]pyrazin-8-amine	experimental	experimental
5420	dbank_005420	-7.6	24755471	DB08108	468.479	468.099	8	C23H20N2O7S	N-({6-[(4-CYANOBENZYL)OXY]NAPHTHALEN-2-YL}SULFONYL)-D-GLUTAMIC ACID	experimental	experimental
5428	dbank_005428	-7.6	46937126	DB08116	490.483	490.105	9	C22H22N2O9S	(3R)-4-{[(3,4-dihydroxyphenyl)acetyl]oxy}-N-(2-formylindolizin-3-yl)-3-sulfino-D-valine	experimental	experimental
5476	dbank_005476	-7.6	24851689	DB08166	328.796	328.109	3	C17H17ClN4O	(4R)-7-chloro-9-methyl-1-oxo-1,2,4,9-tetrahydrospiro[beta-carboline-3,4'-piperidine]-4-carbonitrile	experimental	experimental
5544	dbank_005544	-7.6	5288878	DB08251	342.303	342.085	7	C17H14N2O6	4-[5-(2-CARBOXY-1-FORMYL-ETHYLCARBAMOYL)-PYRIDIN-3-YL]-BENZOIC ACID	experimental	experimental
5556	dbank_005556	-7.6	5326928	DB08267	305.334	305.128	4	C17H15N5O	6-amino-4-(2-phenylethyl)-1,7-dihydro-8H-imidazo[4,5-g]quinazolin-8-one	experimental	experimental
5566	dbank_005566	-7.6	5278688	DB08282	360.815	360.034	3	C17H13ClN2O3S	O-[2-(1,3-dioxo-1,3-dihydro-2H-isoindol-2-yl)ethyl] (4-chlorophenyl)thiocarbamate	experimental	experimental
5652	dbank_005652	-7.6	44141871	DB08384	392.452	392.164	4	C25H20N4O	2-({4-[4-(pyridin-4-ylmethyl)-1H-pyrazol-3-yl]phenoxy}methyl)quinoline	experimental	experimental
5658	dbank_005658	-7.6	54688400	DB08390	362.435	362.189	3	C21H27FO4	(6S)-6-CYCLOPENTYL-6-[2-(3-FLUORO-4-ISOPROPOXYPHENYL)ETHYL]-4-HYDROXY-5,6-DIHYDRO-2H-PYRAN-2-ONE	experimental	experimental
5664	dbank_005664	-7.6	1854	DB08397	302.167	302.016	5	C12H9F2O5P	6-(DIFLUORO-PHOSPHONO-METHYL)-NAPHTHALENE-2-CARBOXYLIC ACID	experimental	experimental
5669	dbank_005669	-7.6	5289162	DB08402	404.204	403.013	5	C18H11Cl2N3O4	2-[(2,4-DICHLOROBENZOYL)AMINO]-5-(PYRIMIDIN-2-YLOXY)BENZOIC ACID	experimental	experimental
5703	dbank_005703	-7.6	25102779	DB08444	420.262	419.038	4	C20H14BrN5O	3-[2-bromo-4-(1H-pyrazolo[3,4-c]pyridazin-3-ylmethyl)phenoxy]-5-methylbenzonitrile	experimental	experimental
5716	dbank_005716	-7.6	16045418	DB08460	426.256	425.045	5	C20H13Cl2N5O2	3-{5-[(6-amino-1H-pyrazolo[3,4-b]pyridin-3-yl)methoxy]-2-chlorophenoxy}-5-chlorobenzonitrile	experimental	experimental
5720	dbank_005720	-7.6	11373270	DB08464	411.79	411.072	7	C18H18ClNO8	METHYL 3-CHLORO-2-{3-[(2,5-DIHYDROXY-4-METHOXYPHENYL)AMINO]-3-OXOPROPYL}-4,6-DIHYDROXYBENZOATE	experimental	experimental
5734	dbank_005734	-7.6	7297549	DB08481	362.423	362.039	4	C16H14N2O4S2	4-Methyl-N-[5-(5-methyl-furan-2-ylmethylene)-4-oxo-thiazolidin-2-ylidene]-benzenesulfonamide	experimental	experimental
5785	dbank_005785	-7.6	10249182	DB08537	380.241	379.043	4	C18H14BrN5	3-bromo-6-phenyl-N-(pyrimidin-5-ylmethyl)imidazo[1,2-a]pyridin-8-amine	experimental	experimental
5810	dbank_005810	-7.6	16122642	DB08569	437.332	436.09	4	C22H21BrN4O	3-PYRIDIN-4-YL-2,4-DIHYDRO-INDENO[1,2-.C.] PYRAZOLE	experimental	experimental
5833	dbank_005833	-7.6	25147494	DB08596	309.361	309.169	5	C15H23N3O4	5'-deoxy-5'-piperidin-1-ylthymidine	experimental	experimental
5883	dbank_005883	-7.6	17758816	DB08657	482.535	482.083	7	C21H18N6O4S2	2-(4-(2-((3-(5-(PYRIDIN-2-YLTHIO)THIAZOL-2-YL)UREIDO)METHYL)-1H-IMIDAZOL-4-YL)PHENOXY)ACETIC ACID	experimental	experimental
5887	dbank_005887	-7.6	25147495	DB08661	295.334	295.153	5	C14H21N3O4	1-(2,5-dideoxy-5-pyrrolidin-1-yl-beta-L-erythro-pentofuranosyl)-5-methylpyrimidine-2,4(1H,3H)-dione	experimental	experimental
5916	dbank_005916	-7.6	9817550	DB08694	293.283	293.103	7	C14H11N7O	Variolin B	experimental	experimental
5924	dbank_005924	-7.6	11582002	DB08704	395.407	395.169	8	C18H25N3O7	[[(3R,4R,5S,6R)-4,5-dihydroxy-6-(hydroxymethyl)-3-(pentanoylamino)oxan-2-ylidene]amino] N-phenylcarbamate	experimental	experimental
5969	dbank_005969	-7.6	24894149	DB08750	367.42	367.181	5	C20H22FN5O	1-[4-(AMINOMETHYL)BENZOYL]-5'-FLUORO-1'H-SPIRO[PIPERIDINE-4,2'-QUINAZOLIN]-4'-AMINE	experimental	experimental
5986	dbank_005986	-7.6	176407	DB08770	337.336	337.129	7	C16H15N7O2	4-{2-[(7-amino-2-furan-2-yl[1,2,4]triazolo[1,5-a][1,3,5]triazin-5-yl)amino]ethyl}phenol	experimental	experimental
6038	dbank_006038	-7.6	9848818	DB08834	499.71	499.297	6	C26H45NO6S	Tauroursodeoxycholic acid	experimental; investigational	experimental	investigational
6076	dbank_006076	-7.6	15951529	DB08899	464.436	464.093	3	C21H16F4N4O2S	Enzalutamide	approved	approved
6100	dbank_006100	-7.6	3824	DB08940	322.358	322.132	3	C19H18N2O3	Kebuzone	experimental	experimental
6129	dbank_006129	-7.6	20054914	DB08973	487.39	486.138	5	C24H29Cl2FO5	Fluclorolone acetonide	approved; withdrawn	approved	withdrawn
6193	dbank_006193	-7.6	57379345	DB09063	558.14	557.223	8	C28H36ClN5O3S	Ceritinib	approved	approved
6284	dbank_006284	-7.6	5311356	DB09209	398.495	398.221	6	C23H30N2O4	Pholcodine	approved; illicit	approved	illicit
6311	dbank_006311	-7.6	60602	DB09239	609.723	609.284	6	C36H39N3O6	Niguldipine	experimental	experimental
6355	dbank_006355	-7.6	71496458	DB09330	499.619	499.27	7	C28H33N7O2	Osimertinib	approved	approved
6377	dbank_006377	-7.6	638678	DB09421	362.384	362.17	5	C16H22N6O4	Protirelin	approved; investigational	approved	investigational
6468	dbank_006468	-7.6	49806720	DB11363	482.617	482.268	5	C30H34N4O2	Alectinib	approved; investigational	approved	investigational
6503	dbank_006503	-7.6	60651	DB11426	362.361	362.139	8	C17H19FN4O4	Marbofloxacin	vet_approved	vet_approved
6504	dbank_006504	-7.6	204108	DB11427	468.685	468.314	3	C32H40N2O	Maropitant	vet_approved	vet_approved
6507	dbank_006507	-7.6	441145	DB11430	670.881	670.429	11	C36H62O11	Monensin	experimental; vet_approved	experimental	vet_approved
6514	dbank_006514	-7.6	7061800	DB11443	395.382	395.146	6	C19H20F3N3O3	Orbifloxacin	vet_approved	vet_approved
6528	dbank_006528	-7.6	59757	DB11466	385.85	385.119	4	C20H20ClN3O3	Tepoxalin	vet_approved	vet_approved
6567	dbank_006567	-7.6	53465279	DB11560	404.28	402.999	4	C17H14BrN3O2S	Lesinurad	approved; investigational	approved	investigational
6608	dbank_006608	-7.6	11508736	DB11658	358.41	358.099	5	C18H18N2O4S	QAV-680	investigational	investigational
6666	dbank_006666	-7.6	24788740	DB11743	457.996	457.224	6	C24H32ClN5O2	Ipatasertib	investigational	investigational
6677	dbank_006677	-7.6	25062766	DB11763	414.469	414.18	7	C23H22N6O2	Momelotinib	investigational	investigational
6710	dbank_006710	-7.6	9863341	DB11806	352.518	352.24	2	C24H32O2	VTP-194204	investigational	investigational
6712	dbank_006712	-7.6	12082259	DB11811	415.79	415.08	3	C19H17ClF3NO4	Arhalofenate	investigational	investigational
6732	dbank_006732	-7.6	45375953	DB11836	309.333	309.134	6	C15H15N7O	Sapanisertib	investigational	investigational
6748	dbank_006748	-7.6	10117987	DB11864	503.567	503.239	9	C25H29N9O3	Preladenant	investigational	investigational
6765	dbank_006765	-7.6	176873	DB11890	588.666	588.302	10	C27H40N8O7	Cilengitide	investigational	investigational
6767	dbank_006767	-7.6	65947	DB11892	461.46	461.106	8	C21H20FN3O6S	Prulifloxacin	investigational	investigational
[truncated: 6,774 more rows]

## Sheet: 8820mols
id	molecular formula	weight1	weight2	H	beizhu
DB00114	C8H10NO6P	247.142	247.025	6	approved; investigational; nutraceutical
DB00116	C19H23N7O6	445.429	445.171	12	nutraceutical
DB00117	C6H9N3O2	155.155	155.069	4	investigational; nutraceutical
DB00118	C15H22N6O5S	398.44	398.137	10	approved; investigational; nutraceutical
DB00119	C3H4O3	88.0621	88.016	3	approved; investigational; nutraceutical
DB00120	C9H11NO2	165.189	165.079	3	approved; investigational; nutraceutical
DB00121	C10H16N2O3S	244.311	244.088	3	approved; investigational; nutraceutical
DB00122	C5H14NO	104.171	104.108	1	approved; nutraceutical
DB00123	C6H14N2O2	146.188	146.106	4	approved; nutraceutical
DB00125	C6H14N4O2	174.201	174.112	6	investigational; nutraceutical
DB00126	C6H8O6	176.124	176.032	5	approved; nutraceutical
DB00127	C10H26N4	202.34	202.216	4	experimental; nutraceutical
DB00128	C4H7NO4	133.103	133.038	5	approved; nutraceutical
DB00129	C5H12N2O2	132.161	132.09	4	approved; nutraceutical
DB00130	C5H10N2O3	146.144	146.069	4	approved; investigational; nutraceutical
DB00131	C10H14N5O7P	347.221	347.063	10	approved; investigational; nutraceutical
DB00132	C18H30O2	278.43	278.225	2	approved; investigational; nutraceutical
DB00133	C3H7NO3	105.093	105.043	4	investigational; nutraceutical
DB00134	C5H11NO2S	149.211	149.051	3	approved; nutraceutical
DB00135	C9H11NO3	181.189	181.074	4	approved; investigational; nutraceutical
DB00136	C27H44O3	416.637	416.329	3	approved; nutraceutical
DB00137	C40H56O2	568.886	568.428	2	approved; investigational; nutraceutical
DB00138	C6H12N2O4S2	240.3	240.024	6	approved; nutraceutical
DB00139	C4H6O4	118.088	118.027	4	approved; nutraceutical
DB00140	C17H20N4O6	376.364	376.138	9	approved; investigational; nutraceutical; vet_approved
DB00141	C8H15NO6	221.208	221.09	6	approved; investigational; nutraceutical
DB00142	C5H9NO4	147.129	147.053	5	approved; nutraceutical
DB00143	C10H17N3O6S	307.323	307.084	7	approved; investigational; nutraceutical
DB00144	C13H24NO10P	385.304	385.114	7	approved; investigational; nutraceutical
DB00145	C2H5NO2	75.0666	75.032	3	approved; nutraceutical; vet_approved
DB00146	C27H44O2	400.637	400.334	2	approved; nutraceutical
DB00147	C8H9NO3	167.162	167.058	4	experimental; nutraceutical
DB00148	C4H9N3O2	131.133	131.069	5	approved; investigational; nutraceutical
DB00149	C6H13NO2	131.173	131.095	3	investigational; nutraceutical
DB00150	C11H12N2O2	204.225	204.09	3	approved; nutraceutical; withdrawn
DB00151	C3H7NO2S	121.158	121.02	3	approved; nutraceutical
DB00152	C12H17N4OS	265.355	265.112	4	approved; investigational; nutraceutical; vet_approved
DB00153	C28H44O	396.648	396.339	1	approved; nutraceutical
DB00154	C20H34O2	306.483	306.256	2	investigational; nutraceutical
DB00155	C6H13N3O3	175.186	175.096	4	approved; investigational; nutraceutical
DB00156	C4H9NO3	119.119	119.058	4	approved; nutraceutical
DB00157	C21H29N7O14P2	665.441	665.125	16	approved; nutraceutical
DB00158	C19H19N7O6	441.397	441.14	12	approved; nutraceutical; vet_approved
DB00159	C20H30O2	302.451	302.225	2	approved; nutraceutical
DB00160	C3H7NO2	89.0932	89.0477	3	nutraceutical
DB00161	C5H11NO2	117.146	117.079	3	approved; nutraceutical
DB00162	C20H30O	286.452	286.23	1	approved; nutraceutical; vet_approved
DB00163	C29H50O2	430.706	430.381	2	approved; nutraceutical; vet_approved
DB00165	C8H11NO3	169.178	169.074	4	approved; investigational; nutraceutical; vet_approved
DB00166	C8H14O2S2	206.326	206.044	2	approved; investigational; nutraceutical
DB00167	C6H13NO2	131.173	131.095	3	investigational; nutraceutical
DB00168	C14H18N2O5	294.303	294.122	5	investigational; nutraceutical
DB00169	C27H44O	384.638	384.339	1	approved; nutraceutical
DB00170	C11H8O2	172.18	172.052	2	approved; nutraceutical
DB00171	C10H16N5O13P3	507.181	506.996	14	investigational; nutraceutical
DB00172	C5H9NO2	115.13	115.063	3	nutraceutical
DB00173	C5H5N5	135.127	135.054	4	approved; nutraceutical
DB00174	C4H8N2O3	132.118	132.053	4	approved; investigational; nutraceutical
DB00175	C23H36O7	424.528	424.246	6	approved
DB00176	C15H21F3N2O2	318.34	318.156	4	approved; investigational
DB00177	C24H29N5O3	435.519	435.227	6	approved; investigational
DB00178	C23H32N2O5	416.511	416.231	5	approved
DB00179	C18H22O4	302.365	302.152	4	approved; investigational
DB00180	C24H31FO6	434.498	434.21	6	approved; investigational
DB00181	C10H12ClNO2	213.661	213.056	3	approved
DB00182	C9H13N	135.206	135.105	1	approved; illicit; investigational
DB00184	C10H14N2	162.232	162.116	2	approved
DB00185	C10H17NOS	199.313	199.103	2	approved
DB00186	C15H10Cl2N2O2	321.158	320.012	3	approved
DB00187	C16H25NO4	295.374	295.178	4	approved
DB00189	C7H9ClO	144.6	144.034	1	approved; illicit; withdrawn
DB00190	C10H14N2O4	226.229	226.095	6	approved
DB00191	C10H15N	149.233	149.12	1	approved; illicit
DB00192	C20H24N2O	308.417	308.189	2	approved
DB00193	C16H25NO2	263.375	263.189	3	approved; investigational
DB00194	C10H13N5O4	267.241	267.097	8	approved; investigational
DB00195	C18H29NO3	307.428	307.215	4	approved; investigational
DB00196	C13H12F2N6O	306.271	306.104	5	approved; investigational
DB00197	C24H27NO5S	441.54	441.161	5	approved; investigational; withdrawn
DB00198	C16H28N2O4	312.404	312.205	4	approved
DB00201	C8H10N4O2	194.191	194.08	3	approved
DB00202	C14H30N2O4	290.399	290.221	2	approved
DB00203	C22H30N6O4S	474.576	474.205	8	approved; investigational
DB00204	C19H27N3O5S2	441.565	441.139	6	approved; investigational
DB00205	C12H13ClN4	248.711	248.083	4	approved; investigational; vet_approved
DB00206	C33H40N2O9	608.679	608.273	8	approved; investigational
DB00208	C14H14ClNS	263.786	263.054	1	approved
DB00210	C28H28O3	412.52	412.204	3	approved
DB00211	C12H18N2O4	254.282	254.127	5	approved
DB00213	C16H15F2N3O4S	383.37	383.075	6	approved
DB00214	C16H20N4O3S	348.42	348.126	5	approved
DB00215	C20H21FN2O	324.392	324.164	3	approved
DB00216	C22H26N2O2S	382.519	382.171	3	approved; investigational
DB00217	C10H15N3	177.246	177.127	3	approved
DB00218	C21H24FN3O4	401.431	401.175	7	approved; investigational
DB00219	C21H34NO3	348.5	348.254	2	approved
DB00220	C32H45N3O4S	567.782	567.313	5	approved
DB00221	C13H21NO3	239.311	239.152	4	approved
DB00223	C22H28F2O5	410.452	410.19	5	approved
DB00224	C36H47N5O4	613.789	613.363	7	approved
DB00226	C10H19N3O2	213.277	213.148	5	approved
DB00227	C24H36O5	404.54	404.256	3	approved; investigational
DB00228	C3H2ClF5O	184.492	183.971	1	approved; investigational; vet_approved
DB00229	C18H23N9O4S3	525.628	525.104	10	approved; investigational
DB00230	C8H17NO2	159.226	159.126	3	approved; investigational
DB00231	C16H13ClN2O2	300.74	300.067	3	approved; investigational
DB00232	C9H11Cl2N3O4S2	360.237	358.957	5	approved
DB00233	C7H7NO3	153.135	153.043	4	approved
DB00234	C19H23NO3	313.397	313.168	4	approved; experimental
DB00235	C12H9N3O	211.219	211.075	3	approved
DB00236	C10H16Br2N2O2	356.054	353.958	2	approved
DB00237	C10H16N2O3	212.246	212.116	3	approved; illicit
DB00238	C15H14N4O	266.298	266.117	4	approved
DB00239	C18H13Cl4N3O	429.12	426.981	3	approved
DB00240	C22H29ClO5	408.916	408.17	5	approved
DB00241	C11H16N2O3	224.256	224.116	3	approved; illicit
DB00242	C10H12ClN5O3	285.687	285.063	7	approved; investigational
DB00243	C24H33N3O4	427.536	427.247	6	approved; investigational
DB00244	C7H7NO3	153.135	153.043	4	approved
DB00246	C21H21ClN4OS	412.936	412.112	4	approved
DB00247	C21H27N3O2	353.458	353.21	3	approved
DB00248	C26H37N5O2	451.604	451.295	4	approved
DB00249	C9H11IN2O5	354.099	353.971	5	approved; investigational
DB00250	C12H12N2O2S	248.301	248.062	4	approved; investigational
DB00251	C26H31Cl2N5O3	532.462	531.18	7	approved
DB00252	C15H12N2O2	252.268	252.09	2	approved; vet_approved
DB00253	C22H32O3	344.488	344.235	3	approved
DB00255	C18H20O2	268.356	268.146	2	approved; investigational
DB00257	C22H17ClN2	344.837	344.108	1	approved; vet_approved
DB00259	C6H8N2O2S	172.205	172.031	3	approved
DB00260	C3H6N2O2	102.092	102.043	3	approved
DB00261	C10H7Cl2N3O	256.088	254.997	3	approved
DB00262	C5H9Cl2N3O2	214.05	213.007	2	approved; investigational
DB00263	C11H13N3O3S	267.304	267.068	4	approved; vet_approved
DB00264	C15H25NO3	267.364	267.183	4	approved; investigational
DB00265	C13H17NO	203.28	203.131	1	approved
DB00266	C19H12O6	336.295	336.063	4	approved
DB00267	C16H17N9O5S3	511.558	511.051	11	approved
DB00268	C16H24N2O	260.375	260.189	2	approved; investigational
DB00269	C23H21ClO3	380.864	380.118	3	investigational; withdrawn
DB00270	C19H21N3O5	371.387	371.148	5	approved; investigational
DB00271	C11H9I3N2O4	613.914	613.77	4	approved; vet_approved
DB00272	C5H9N3	111.145	111.08	2	approved
DB00273	C12H21NO8S	339.362	339.099	8	approved
DB00274	C15H17N7O5S3	471.534	471.045	9	approved; investigational
DB00275	C24H26N6O3	446.502	446.207	7	approved; investigational
DB00276	C21H19N3O3S	393.459	393.115	5	approved; investigational
DB00277	C7H8N4O2	180.164	180.065	3	approved
DB00278	C23H36N6O5S	508.64	508.247	9	approved; investigational
DB00279	C15H12I3NO4	650.973	650.79	4	approved; vet_approved
DB00280	C21H29N3O	339.474	339.231	3	approved
DB00281	C14H22N2O	234.337	234.173	2	approved; vet_approved
DB00282	C3H11NO7P2	235.07	235.001	8	approved
DB00283	C21H26ClNO	343.89	343.17	2	approved; investigational
DB00284	C25H43NO18	645.608	645.248	19	approved; investigational
DB00285	C17H27NO2	277.402	277.204	3	approved
DB00287	C26H35F3O6	500.548	500.239	5	approved
DB00288	C28H35FO7	502.572	502.237	6	approved
DB00289	C17H21NO	255.355	255.162	2	approved
DB00291	C14H19Cl2NO2	304.212	303.079	3	approved
DB00292	C14H16N2O2	244.289	244.121	2	approved
DB00293	C21H22N4O6S	458.488	458.126	9	approved; investigational
DB00294	C22H28O2	324.457	324.209	2	approved; investigational
DB00295	C17H19NO3	285.338	285.136	4	approved; investigational
DB00296	C17H26N2O	274.401	274.205	2	approved
DB00297	C18H28N2O	288.428	288.22	2	approved; investigational
DB00298	C19H27N5	325.451	325.227	4	approved
DB00299	C10H15N5O3	253.258	253.117	7	approved
DB00301	C19H17ClFN3O5S	453.872	453.056	5	approved; investigational
DB00303	C22H25N3O7S	475.515	475.141	8	approved; investigational
DB00304	C22H30O	310.473	310.23	1	approved
DB00305	C15H18N4O5	334.327	334.128	7	approved
DB00306	C11H16N2O3	224.256	224.116	3	approved; illicit
DB00307	C24H28O2	348.478	348.209	2	approved; investigational
DB00308	C20H36N2O3S	384.576	384.245	4	approved
DB00310	C14H11ClN2O4S	338.766	338.013	4	approved
DB00311	C9H10N2O3S2	258.317	258.013	4	withdrawn
DB00312	C11H18N2O3	226.272	226.132	3	approved; investigational; vet_approved
DB00313	C8H16O2	144.211	144.115	2	approved; investigational
DB00315	C16H21N3O2	287.357	287.163	2	approved; investigational
DB00316	C8H9NO2	151.163	151.063	2	approved
DB00317	C22H24ClFN4O3	446.902	446.152	7	approved; investigational
DB00318	C18H21NO3	299.364	299.152	4	approved; illicit
DB00319	C23H27N5O7S	517.555	517.163	7	approved
DB00320	C33H37N5O5	583.677	583.279	6	approved; investigational
DB00321	C20H23N	277.403	277.183	1	approved
DB00322	C9H11FN2O5	246.192	246.065	5	approved
DB00323	C14H11NO5	273.241	273.064	5	approved; withdrawn
DB00324	C22H29FO4	376.462	376.205	4	approved; investigational
DB00327	C17H19NO3	285.338	285.136	4	approved; illicit
DB00328	C19H16ClNO4	357.788	357.077	4	approved; investigational
DB00330	C10H24N2O2	204.31	204.184	4	approved
DB00331	C4H11N5	129.164	129.101	5	approved
DB00333	C21H27NO	309.445	309.209	2	approved
DB00335	C14H22N2O3	266.336	266.163	4	approved
DB00336	C6H6N4O4	198.136	198.039	4	approved; investigational; vet_approved
DB00338	C17H19N3O3S	345.416	345.115	5	approved; investigational; vet_approved
DB00339	C5H5N3O	123.113	123.043	3	approved; investigational
DB00340	C20H23NS	309.468	309.155	1	approved
DB00341	C21H25ClN2O3	388.888	388.155	5	approved
DB00342	C32H41NO2	471.673	471.314	3	approved; withdrawn
DB00343	C22H26N2O4S	414.518	414.161	4	approved; investigational
DB00344	C19H21N	263.377	263.167	1	approved
DB00345	C9H10N2O3	194.187	194.069	4	approved; investigational
DB00346	C19H27N5O4	389.449	389.206	8	approved; investigational
DB00347	C6H9NO3	143.141	143.058	2	approved
DB00348	C14H10F3NO5	329.228	329.051	5	approved; investigational
DB00349	C16H13ClN2O2	300.74	300.067	2	approved; illicit
DB00351	C24H32O4	384.516	384.23	3	approved; investigational; vet_approved
DB00352	C5H5N5S	167.192	167.027	4	approved
DB00353	C20H25N3O2	339.431	339.195	3	approved
DB00354	C28H33ClN2	433.028	432.233	2	approved
DB00355	C13H17N5O8S2	435.433	435.052	10	approved
DB00356	C7H4ClNO2	169.565	168.993	2	approved
DB00357	C13H16N2O2	232.278	232.121	3	approved; investigational
DB00358	C17H16F6N2O	378.312	378.117	3	approved; investigational
DB00359	C10H10N4O2S	250.277	250.052	5	approved; investigational; vet_approved
DB00360	C9H15N5O3	241.247	241.117	7	approved; investigational
DB00365	C19H22FN3O3	359.395	359.165	6	approved; investigational; withdrawn
DB00366	C17H22N2O	270.369	270.173	3	approved; vet_approved
DB00367	C21H28O2	312.446	312.209	2	approved; investigational
DB00368	C8H11NO3	169.178	169.074	4	approved
DB00369	C8H14N3O6P	279.187	279.062	8	approved
DB00370	C17H19N3	265.353	265.158	3	approved
DB00371	C9H18N2O4	218.25	218.127	2	approved; illicit
DB00372	C22H29N3S2	399.616	399.18	3	approved; withdrawn
DB00373	C13H24N4O3S	316.42	316.157	7	approved
DB00374	C23H34O5	390.513	390.241	5	approved; investigational
DB00376	C20H31NO	301.466	301.241	2	approved
DB00377	C19H24N2O	296.414	296.189	2	approved; investigational
DB00378	C21H28O2	312.446	312.209	2	approved; investigational; withdrawn
DB00379	C11H17NO	179.259	179.131	2	approved; investigational
DB00380	C11H16N4O4	268.269	268.117	6	approved; withdrawn
DB00381	C20H25ClN2O5	408.876	408.145	5	approved
DB00382	C13H14N2	198.264	198.116	2	approved; investigational; withdrawn
DB00383	C20H28N2O3	344.448	344.21	4	approved
DB00384	C12H11N7	253.263	253.108	7	approved
DB00387	C19H29NO	287.44	287.225	2	approved
DB00388	C9H13NO2	167.205	167.095	3	approved
DB00389	C7H10N2O2S	186.232	186.046	1	approved; investigational
DB00391	C15H23N3O4S	341.426	341.141	5	approved; investigational
DB00392	C19H24N2S	312.472	312.166	2	approved
DB00393	C21H26N2O7	418.44	418.174	6	approved; investigational
DB00394	C28H37ClO7	521.042	520.223	5	approved; investigational
DB00395	C12H24N2O4	260.33	260.174	2	approved
DB00396	C21H30O2	314.462	314.225	2	approved; vet_approved
DB00397	C9H13NO	151.209	151.1	2	approved; vet_approved; withdrawn
DB00398	C21H16ClF3N4O3	464.825	464.086	3	approved; investigational
DB00399	C5H10N2O7P2	272.09	271.996	8	approved
DB00400	C17H17ClO6	352.766	352.071	6	approved; investigational; vet_approved
DB00401	C20H24N2O6	388.414	388.163	5	approved
DB00402	C17H17ClN6O3	388.808	388.105	6	approved; investigational
DB00404	C17H13ClN4	308.765	308.083	3	approved; illicit; investigational
DB00405	C16H19BrN2	319.239	318.073	2	approved
DB00406	C25H30N3	372.526	372.244	2	approved
DB00408	C18H18ClN3O	327.808	327.114	3	approved
DB00409	C16H23BrN2O3	371.269	370.089	4	approved; withdrawn
DB00411	C6H15N2O2	147.196	147.113	1	approved
DB00412	C18H19N3O3S	357.427	357.115	5	approved; investigational
DB00413	C10H17N3S	211.327	211.114	3	approved; investigational
DB00414	C15H20N2O4S	324.395	324.114	4	approved; investigational; withdrawn
DB00415	C16H19N3O4S	349.405	349.11	5	approved; vet_approved
DB00417	C16H18N2O5S	350.39	350.094	5	approved; vet_approved
DB00418	C12H18N2O3	238.283	238.132	3	approved; vet_approved
DB00419	C10H21NO4	219.278	219.147	5	approved
DB00420	C17H20N2S	284.419	284.135	2	approved; vet_approved
DB00421	C24H32O4S	416.573	416.202	3	approved
DB00422	C14H19NO2	233.306	233.142	2	approved; investigational
DB00423	C11H15NO5	241.24	241.095	4	approved; vet_approved
DB00425	C19H21N3O	307.389	307.168	2	approved
DB00426	C14H19N5O4	321.332	321.144	6	approved; investigational
DB00427	C19H22N2	278.391	278.178	2	approved
DB00428	C8H15N3O7	265.221	265.091	7	approved; investigational
DB00430	C25H24N8O7S2	612.637	612.121	11	approved
DB00432	C10H11F3N2O5	296.2	296.062	5	approved; investigational
DB00433	C20H24ClN3S	373.943	373.138	3	approved; vet_approved
DB00434	C21H21N	287.398	287.167	1	approved
DB00436	C15H14F3N3O4S2	421.415	421.038	5	approved
DB00437	C5H4N4O	136.112	136.039	4	approved
DB00438	C22H22N6O7S2	546.576	546.099	10	approved
DB00439	C26H34FNO5	459.55	459.242	6	approved; withdrawn
DB00440	C14H18N4O3	290.318	290.138	7	approved; vet_approved
DB00441	C9H11F2N3O4	263.198	263.072	6	approved
DB00442	C12H15N5O3	277.279	277.117	7	approved; investigational
DB00443	C22H29FO5	392.461	392.2	5	approved; vet_approved
DB00444	C32H32O13S	656.654	656.156	12	approved
DB00445	C27H29NO11	543.519	543.174	12	approved
DB00446	C11H12Cl2N2O5	323.129	322.012	5	approved; vet_approved
DB00447	C16H16ClN3O4	349.769	349.083	5	approved; investigational; withdrawn
DB00448	C16H14F3N3O2S	369.361	369.076	4	approved; investigational
DB00449	C19H29NO5	351.437	351.205	4	approved
DB00450	C22H22FN3O2	379.427	379.17	3	approved; vet_approved
DB00451	C15H11I4NO4	776.87	776.687	4	approved
DB00452	C23H46N6O13	614.644	614.312	19	approved
DB00454	C15H21NO2	247.333	247.157	2	approved
DB00455	C22H23ClN2O2	382.883	382.145	2	approved; investigational
DB00456	C16H16N2O6S2	396.438	396.045	5	approved; investigational; vet_approved
DB00457	C19H21N5O4	383.401	383.159	7	approved
DB00458	C19H24N2	280.407	280.194	2	approved
DB00459	C21H26O3	326.429	326.188	3	approved
DB00461	C15H16O2	228.286	228.115	2	approved
DB00463	C9H14N2O3	198.219	198.1	3	withdrawn
DB00465	C15H13NO3	255.269	255.09	3	approved
DB00467	C15H17FN4O3	320.319	320.128	7	approved; investigational
DB00468	C20H24N2O2	324.417	324.184	4	approved
DB00469	C13H11N3O4S2	337.37	337.019	5	approved
DB00470	C21H30O2	314.462	314.225	2	approved; illicit
DB00471	C35H36ClNO3S	586.183	585.21	4	approved
DB00472	C17H18F3NO	309.326	309.134	2	approved; vet_approved
DB00473	C16H23NO2	261.359	261.173	2	approved; withdrawn
DB00474	C14H18N2O3	262.304	262.132	3	approved
DB00476	C18H19NOS	297.415	297.119	2	approved
DB00477	C17H19ClN2S	318.864	318.096	2	approved; investigational; vet_approved
DB00478	C12H21N	179.302	179.167	1	approved; investigational
DB00479	C22H43N5O13	585.602	585.286	17	approved; investigational; vet_approved
DB00480	C13H13N3O3	259.261	259.096	4	approved
DB00481	C28H27NO4S	473.583	473.166	5	approved; investigational
DB00482	C17H14F3N3O2S	381.372	381.076	3	approved; investigational
DB00484	C11H10BrN5	292.135	291.012	5	approved
DB00485	C19H17Cl2N3O5S	470.326	469.027	5	approved; investigational; vet_approved
DB00486	C24H36O3	372.541	372.266	3	approved; investigational
DB00487	C17H20FN3O3	333.357	333.149	6	approved
DB00488	C9H18N6	210.279	210.159	6	approved
DB00489	C12H20N2O3S	272.364	272.119	4	approved
DB00490	C21H31N5O2	385.503	385.248	6	approved; investigational
DB00491	C8H17NO5	207.224	207.111	6	approved
DB00493	C16H17N5O7S2	455.465	455.057	9	approved
DB00494	C14H15N3O5	305.286	305.101	6	approved; investigational
DB00495	C10H13N5O4	267.241	267.097	6	approved
DB00496	C28H30N2O2	426.55	426.231	3	approved; investigational
DB00497	C18H21NO4	315.364	315.147	5	approved; illicit; investigational
DB00498	C15H10O2	222.239	222.068	2	approved; investigational
DB00499	C11H11F3N2O3	276.212	276.072	3	approved; investigational
DB00500	C15H15NO3	257.284	257.105	3	approved
DB00501	C10H16N6S	252.339	252.116	5	approved; investigational
DB00502	C21H23ClFNO2	375.864	375.14	3	approved
DB00504	C19H25NO	283.408	283.194	2	approved
DB00505	C21H36NO	318.517	318.28	1	withdrawn
DB00507	C12H9N3O5S	307.282	307.026	5	approved; investigational; vet_approved
DB00508	C18H19F3N2S	352.417	352.122	2	approved; vet_approved
DB00509	C15H11I4NO4	776.87	776.687	4	approved; investigational
DB00513	C6H13NO2	131.173	131.095	3	approved; investigational
DB00514	C18H25NO	271.404	271.194	2	approved
DB00518	C12H15N3O2S	265.331	265.088	3	approved; vet_approved
DB00519	C24H34N2O5	430.537	430.247	5	approved
DB00521	C16H24N2O3	292.373	292.179	4	approved
DB00522	C23H20N2O5	404.415	404.137	5	investigational; withdrawn
DB00523	C20H28O2	300.435	300.209	2	approved; investigational
DB00524	C16H16ClN3O3S	365.835	365.06	4	approved
DB00525	C19H17NOS	307.409	307.103	1	approved; investigational; vet_approved
DB00527	C20H29N3O2	343.463	343.226	4	approved; vet_approved
DB00528	C36H41N3O6	611.727	611.3	6	approved; investigational
DB00529	CH3O5P	126.005	125.972	5	approved
DB00530	C22H23N3O4	393.436	393.169	7	approved; investigational
DB00531	C7H15Cl2N2O2P	261.086	260.025	2	approved; investigational
DB00532	C12H14N2O2	218.252	218.106	2	approved; investigational; withdrawn
DB00533	C17H14O4S	314.356	314.061	3	approved; investigational; withdrawn
DB00535	C14H13N5O5S2	395.414	395.036	8	approved
DB00536	CH5N3	59.0705	59.0483	3	approved
DB00537	C17H18FN3O3	331.341	331.133	6	approved; investigational
DB00539	C26H28ClNO	405.96	405.186	2	approved; investigational
DB00540	C19H21N	263.377	263.167	1	approved
DB00542	C24H28N2O5	424.49	424.2	5	approved; investigational
DB00543	C17H16ClN3O	313.781	313.098	3	approved
DB00544	C4H3FN2O2	130.077	130.018	2	approved
DB00545	C9H13N2O2	181.212	181.098	1	approved; investigational
DB00546	C19H18ClN5	351.833	351.125	4	experimental
DB00547	C22H29FO4	376.462	376.205	4	approved
DB00548	C9H16O4	188.221	188.105	4	approved
DB00549	C31H33N3O6S	575.675	575.209	6	approved; investigational
DB00550	C7H10N2OS	170.232	170.051	1	approved; investigational
DB00551	C2H5NO2	75.0666	75.032	2	approved
DB00552	C11H16N4O4	268.269	268.117	7	approved; investigational
DB00553	C12H8O4	216.192	216.042	2	approved
DB00554	C15H13N3O4S	331.346	331.063	5	approved; investigational
DB00555	C9H7Cl2N5	256.091	255.008	5	approved; investigational
DB00556	C3F8	188.019	187.987	0	approved
DB00557	C21H27ClN2O2	374.904	374.176	4	approved
DB00558	C12H20N4O7	332.31	332.133	10	approved; investigational
DB00559	C27H29N5O6S	551.614	551.184	9	approved; investigational
DB00561	C24H30N2O2	378.507	378.231	3	approved; vet_approved
DB00562	C15H14ClN3O4S3	431.937	430.983	6	approved
DB00563	C20H22N8O5	454.439	454.171	12	approved
DB00564	C15H12N2O	236.269	236.095	1	approved; investigational
DB00566	C4H6O4S2	182.21	181.971	4	approved
DB00567	C16H17N3O4S	347.389	347.094	5	approved; investigational; vet_approved
DB00568	C26H28N2	368.514	368.225	2	approved; investigational
DB00571	C16H21NO2	259.343	259.157	3	approved; investigational
DB00573	C15H14O3	242.27	242.094	2	approved
DB00574	C12H16F3N	231.257	231.123	1	approved; illicit; investigational; withdrawn
DB00575	C9H9Cl2N3	230.094	229.017	3	approved
DB00576	C9H10N4O2S2	270.331	270.025	5	approved; investigational; vet_approved
DB00577	C13H20N6O4	324.336	324.155	8	approved; investigational
DB00578	C17H18N2O6S	378.4	378.089	6	approved; investigational
DB00579	C16H13ClN2O	284.74	284.072	3	approved; investigational
DB00580	C16H14N2O3S	314.359	314.073	3	approved; investigational; withdrawn
DB00581	C12H22O11	342.296	342.116	11	approved
DB00582	C16H14F3N5O	349.31	349.115	5	approved
DB00583	C7H15NO3	161.199	161.105	3	approved; investigational
DB00584	C20H28N2O5	376.447	376.2	5	approved; vet_approved
DB00585	C12H21N5O2S2	331.45	331.114	6	approved
DB00586	C14H11Cl2NO2	296.149	295.017	3	approved; vet_approved
DB00587	C23H28N2O3S	412.545	412.182	4	experimental
DB00588	C25H31F3O5S	500.571	500.184	4	approved
DB00589	C20H26N4O	338.447	338.211	2	approved; investigational
DB00590	C23H25N5O5	451.475	451.186	9	approved
DB00591	C24H30F2O6	452.488	452.201	6	approved; investigational; vet_approved
DB00592	C4H10N2	86.1356	86.0844	2	approved; vet_approved
DB00593	C7H11NO2	141.168	141.079	2	approved
DB00594	C6H8ClN7O	229.627	229.048	7	approved
DB00596	C22H27ClF2O4	428.9	428.157	4	approved
DB00598	C19H24N2O3	328.406	328.179	4	approved
DB00599	C11H18N2O2S	242.338	242.109	2	approved; vet_approved
DB00600	C13H12O2	200.233	200.084	2	approved
DB00601	C16H20FN3O4	337.346	337.144	5	approved; investigational
DB00603	C24H34O4	386.524	386.246	3	approved; investigational
DB00604	C23H29ClFN3O4	465.945	465.183	6	approved; investigational; withdrawn
DB00605	C20H17FO3S	356.411	356.088	3	approved; investigational
DB00606	C14H16ClN3O4S2	389.878	389.027	5	approved
DB00607	C21H22N2O5S	414.475	414.125	5	approved; investigational
DB00608	C18H26ClN3	319.872	319.182	3	approved; investigational; vet_approved
DB00609	C8H10N2S	166.243	166.056	1	approved
DB00610	C9H13NO2	167.205	167.095	3	approved; investigational
DB00611	C21H29NO2	327.461	327.22	3	approved; illicit; vet_approved
DB00612	C18H31NO4	325.443	325.225	5	approved
DB00613	C20H22ClN3O	355.861	355.145	4	approved; investigational
DB00614	C8H7N3O5	225.158	225.039	5	experimental; vet_approved
DB00617	C7H11NO3	157.167	157.074	2	approved
DB00619	C29H31N7O	493.603	493.259	7	approved
DB00620	C21H27FO6	394.434	394.179	6	approved; vet_approved
DB00621	C19H30O3	306.44	306.219	2	approved; investigational
DB00622	C26H29N3O6	479.525	479.206	6	approved; investigational
DB00623	C22H26F3N3OS	437.522	437.175	4	approved
DB00624	C19H28O2	288.424	288.209	2	approved; investigational
DB00625	C14H9ClF3NO2	315.675	315.027	2	approved; investigational
DB00627	C6H5NO2	123.109	123.032	3	approved; investigational; nutraceutical
DB00628	C16H11ClN2O3	314.723	314.046	4	approved; illicit
DB00629	C8H8Cl2N4	231.082	230.013	4	approved; investigational
DB00630	C4H13NO7P2	249.096	249.017	8	approved
DB00631	C10H11ClFN5O3	303.677	303.053	7	approved; investigational
DB00633	C13H16N2	200.28	200.131	1	approved; vet_approved
DB00634	C8H10N2O3S	214.242	214.041	4	approved
DB00635	C21H26O5	358.428	358.178	5	approved; vet_approved
DB00636	C12H15ClO3	242.699	242.071	2	approved; investigational
DB00637	C28H31FN4O	458.57	458.248	4	approved; withdrawn
DB00639	C19H17Cl3N2S	411.776	410.018	1	approved
DB00640	C10H13N5O4	267.241	267.097	8	approved; investigational
DB00641	C25H38O5	418.566	418.272	3	approved
DB00642	C20H21N5O6	427.411	427.149	9	approved; investigational
DB00643	C16H13N3O3	295.293	295.096	4	approved; vet_approved
DB00645	C18H27NO2	289.413	289.204	3	approved
DB00647	C22H29NO2	339.471	339.22	2	approved; illicit; investigational; withdrawn
DB00648	C14H10Cl4	320.041	317.954	0	approved
DB00649	C10H12N2O4	224.213	224.08	4	approved; investigational
DB00650	C20H23N7O7	473.446	473.166	11	approved
DB00651	C10H14N4O4	254.243	254.102	5	approved
DB00652	C19H27NO	285.424	285.209	2	approved; vet_approved
DB00654	C26H40O5	432.593	432.288	4	approved; investigational
DB00655	C18H22O2	270.366	270.162	2	approved
DB00656	C19H22ClN5O	371.864	371.151	4	approved; investigational
DB00657	C11H21N	167.291	167.167	1	approved; investigational
DB00659	C5H11NO4S	181.21	181.041	4	approved; investigational
DB00660	C12H15NO3	221.252	221.105	2	approved
DB00661	C27H38N2O4	454.602	454.283	6	approved
DB00662	C21H28N2O5	388.457	388.2	6	approved; investigational
DB00663	C22H28F2O5	410.458	410.19	5	approved; vet_approved
DB00664	C11H12N4O3S	280.303	280.063	6	approved; withdrawn
DB00665	C12H10F3N3O4	317.221	317.062	4	approved; investigational
DB00668	C9H13NO3	183.204	183.09	4	approved; vet_approved
DB00669	C14H21N3O2S	295.4	295.135	3	approved; investigational
DB00670	C19H21N5O2	351.402	351.17	5	approved
DB00671	C16H15N5O7S2	453.45	453.041	10	approved; investigational
DB00672	C10H13ClN2O3S	276.74	276.034	3	approved; investigational
DB00673	C23H21F7N4O3	534.427	534.15	5	approved; investigational
DB00674	C17H21NO3	287.353	287.152	4	approved
DB00675	C26H29NO	371.515	371.225	2	approved
DB00676	C14H12O2	212.244	212.084	1	approved
DB00677	C6H14FO3P	184.146	184.066	1	approved; investigational; withdrawn
DB00678	C22H23ClN6O	422.911	422.162	5	approved
DB00679	C21H26N2S2	370.575	370.154	2	approved; withdrawn
DB00680	C22H25N3O4S	427.517	427.157	5	approved; investigational; withdrawn
DB00682	C19H16O4	308.328	308.105	3	approved
DB00683	C18H13ClFN3	325.767	325.078	2	approved; illicit
DB00684	C18H37N5O9	467.514	467.259	14	approved; investigational
DB00686	C10H18O21S4	602.497	601.922	17	approved
DB00687	C21H29FO5	380.45	380.2	5	approved; investigational
DB00688	C23H31NO7	433.495	433.21	6	approved; investigational
DB00689	C18H19N3O6S	405.425	405.099	6	approved
DB00690	C21H23ClFN3O	387.878	387.151	3	approved; illicit; investigational
DB00691	C27H34N2O7	498.568	498.237	7	approved
DB00692	C17H19N3O	281.352	281.153	4	approved
DB00693	C20H12O5	332.306	332.068	3	approved
DB00694	C27H29NO10	527.52	527.179	11	approved
DB00695	C12H11ClN2O5S	330.744	330.008	5	approved; vet_approved
DB00696	C33H35N5O5	581.662	581.264	6	approved
DB00697	C9H8ClN5S	253.711	253.019	5	approved; investigational
DB00698	C8H6N4O5	238.159	238.034	5	approved; vet_approved
DB00699	C24H26BrN3O3	484.386	483.116	4	approved; investigational
DB00700	C24H30O6	414.491	414.204	4	approved
DB00701	C25H35N3O6S	505.627	505.225	6	approved; investigational
DB00703	C5H8N4O3S2	236.26	236.004	6	approved
DB00704	C20H23NO4	341.401	341.163	5	approved; investigational; vet_approved
DB00705	C22H28N6O3S	456.561	456.194	6	approved
DB00706	C20H28N2O5S	408.512	408.172	6	approved; investigational
DB00708	C22H30N2O2S	386.551	386.203	3	approved; investigational
DB00709	C8H11N3O3S	229.256	229.052	5	approved; investigational
DB00710	C9H23NO7P2	319.229	319.095	8	approved; investigational
DB00711	C10H21N3O	199.293	199.168	2	approved; investigational; vet_approved
DB00712	C15H13FO2	244.261	244.09	2	approved; investigational
DB00713	C19H19N3O5S	401.436	401.105	5	approved; investigational
DB00714	C17H17NO2	267.322	267.126	3	approved; investigational
DB00715	C19H20FNO3	329.365	329.143	4	approved; investigational
DB00716	C19H17NO7	371.341	371.101	8	approved; investigational
DB00717	C20H26O2	298.419	298.193	2	approved
DB00718	C20H32N5O8P	501.471	501.199	8	approved; investigational
DB00719	C20H22N2	290.402	290.178	2	approved
DB00720	CH4Cl2O6P2	244.892	243.886	6	approved; investigational; vet_approved
DB00721	C13H20N2O2	236.31	236.152	3	approved; investigational; vet_approved
DB00722	C21H31N3O5	405.488	405.226	7	approved; investigational
DB00723	C11H17NO3	211.258	211.121	4	approved; investigational
DB00724	C14H16N4	240.304	240.137	3	approved; investigational
DB00726	C20H26N2	294.434	294.21	2	approved
DB00727	C3H5N3O9	227.087	227.003	9	approved; investigational
DB00728	C32H53N2O4	529.774	529.401	4	approved
DB00730	C10H7N3S	201.248	201.036	2	approved; vet_approved
DB00733	C7H9N2O	137.159	137.071	2	approved; vet_approved
DB00734	C23H27FN4O2	410.485	410.212	4	approved; investigational
DB00735	C21H21N	287.398	287.167	1	approved
DB00736	C17H19N3O3S	345.416	345.115	5	approved; investigational
DB00737	C25H27ClN2	390.948	390.186	2	approved
DB00738	C19H24N4O2	340.42	340.19	6	approved; investigational
DB00739	C19H23N3O4S	389.469	389.141	5	approved; vet_approved; withdrawn
DB00740	C8H5F3N2OS	234.198	234.007	3	approved; investigational
DB00741	C21H30O5	362.46	362.209	5	approved; vet_approved
DB00742	C6H14O6	182.172	182.079	6	approved; investigational
DB00744	C11H12N2O2S	236.29	236.062	2	approved; investigational; withdrawn
DB00745	C15H15NO2S	273.35	273.082	2	approved; investigational
DB00748	C16H19ClN2O	290.788	290.119	3	approved
DB00749	C17H21NO3	287.353	287.152	3	approved; investigational; vet_approved
DB00750	C13H20N2O	220.311	220.158	2	approved
DB00751	C16H15N3	249.31	249.127	3	approved; investigational
DB00752	C9H11N	133.194	133.089	1	approved; investigational
DB00753	C3H2ClF5O	184.492	183.971	1	approved; vet_approved
DB00754	C11H12N2O2	204.225	204.09	2	approved
DB00755	C20H28O2	300.442	300.209	2	approved; investigational; nutraceutical
DB00756	C13H6Cl6O2	406.904	403.85	2	approved; withdrawn
DB00758	C16H16ClNO2S	321.822	321.059	2	approved
DB00760	C17H25N3O5S	383.463	383.151	6	approved; investigational
DB00762	C33H38N4O6	586.678	586.279	6	approved; investigational
DB00763	C4H6N2S	114.169	114.025	0	approved
DB00764	C22H28Cl2O4	427.361	426.136	4	approved; vet_approved
DB00765	C10H13NO3	195.215	195.09	4	approved
DB00766	C8H9NO5	199.161	199.048	5	approved; vet_approved
DB00767	C22H32N2O5	404.5	404.231	5	withdrawn
DB00768	C21H23NO3	337.412	337.168	4	approved
DB00769	C27H41NO6	475.618	475.293	6	approved
DB00770	C20H34O5	354.487	354.241	5	approved; investigational
DB00772	C10H19O6PS2	330.358	330.036	2	approved; investigational
DB00773	C29H32O13	588.557	588.184	12	approved
DB00774	C8H8F3N3O4S2	331.292	330.991	5	approved; investigational
DB00775	C22H36N2O5S	440.597	440.234	6	approved
DB00776	C15H12N2O2	252.268	252.09	2	approved
DB00777	C20H24N2OS	340.482	340.161	3	approved
DB00779	C12H12N2O3	232.235	232.085	5	approved; investigational
DB00780	C8H12N2	136.194	136.1	2	approved
DB00782	C23H30NO3	368.489	368.223	1	approved
DB00783	C18H24O2	272.382	272.178	2	approved; investigational; vet_approved
DB00784	C15H15NO2	241.285	241.11	3	approved
DB00786	C15H29N3O5	331.408	331.211	5	investigational
DB00787	C8H11N5O3	225.205	225.086	7	approved
DB00788	C14H14O3	230.259	230.094	3	approved; vet_approved
DB00790	C19H32N2O5	368.468	368.231	5	approved
DB00791	C8H11Cl2N3O2	252.098	251.023	3	approved
DB00792	C16H21N3	255.358	255.174	3	approved; vet_approved
DB00793	C9H4Cl3IO	361.391	359.837	1	approved; withdrawn
DB00794	C12H14N2O2	218.252	218.106	2	approved; vet_approved
DB00796	C33H34N6O6	610.671	610.254	8	approved
DB00797	C10H12N2	160.216	160.1	2	approved; vet_approved
DB00799	C21H21NO2S	351.462	351.129	2	approved; investigational
DB00800	C16H16ClNO3	305.756	305.082	4	approved
DB00801	C17H12ClF3N2O	352.738	352.059	2	approved; illicit; withdrawn
DB00802	C21H32N6O3	416.517	416.254	6	approved; illicit
DB00804	C19H35NO2	309.487	309.267	2	approved
DB00805	C17H22N4O	298.383	298.179	5	approved
DB00806	C13H18N4O3	278.307	278.138	4	approved; investigational
DB00807	C16H26N2O3	294.389	294.194	4	approved; vet_approved
DB00808	C16H16ClN3O3S	365.835	365.06	4	approved
DB00809	C17H20N2O2	284.353	284.152	3	approved; investigational
DB00810	C21H29NO	311.461	311.225	2	approved; investigational
DB00811	C8H12N4O5	244.205	244.081	7	approved
DB00812	C19H20N2O2	308.374	308.152	2	approved; vet_approved
DB00813	C22H28N2O	336.471	336.22	2	approved; illicit; investigational; vet_approved
DB00814	C14H13N3O4S2	351.401	351.035	5	approved; vet_approved
DB00816	C11H17NO3	211.258	211.121	4	approved
DB00817	C17H14N2O3	294.305	294.1	5	approved; investigational
DB00818	C12H18O	178.271	178.136	1	approved; investigational; vet_approved
DB00819	C4H6N4O3S2	222.245	221.988	5	approved; vet_approved
DB00820	C22H19N3O4	389.404	389.138	4	approved; investigational
DB00821	C15H12ClNO2	273.714	273.056	2	approved; vet_approved; withdrawn
DB00822	C10H20N2S4	296.539	296.051	0	approved
DB00823	C24H32O4	384.509	384.23	2	approved
DB00824	C8H10N4O2	194.191	194.08	3	approved; experimental
DB00825	C10H20O	156.269	156.151	1	approved
DB00826	C33H47NO13	665.733	665.305	13	approved
DB00827	C12H10N2O5	262.218	262.059	7	approved; investigational; withdrawn
DB00828	C3H7O4P	138.059	138.008	4	approved
DB00829	C16H13ClN2O	284.74	284.072	2	approved; illicit; investigational; vet_approved
DB00830	C11H15NO	177.243	177.115	2	approved; illicit
DB00831	C21H24F3N3S	407.496	407.164	3	approved; investigational
DB00832	C11H11NO2	189.21	189.079	2	approved
DB00833	C15H14ClN3O4S	367.807	367.039	5	approved
DB00834	C29H35NO2	429.594	429.267	3	approved; investigational
DB00835	C16H19BrN2	319.239	318.073	2	approved
DB00836	C29H33ClN2O2	477.038	476.223	3	approved
DB00838	C22H28ClFO4	410.907	410.166	4	approved
DB00839	C14H21N3O3S	311.4	311.13	4	approved; investigational
DB00841	C18H23NO3	301.38	301.168	4	approved
DB00842	C15H11ClN2O2	286.713	286.051	3	approved
DB00843	C24H29NO3	379.492	379.215	4	approved
DB00844	C21H27NO4	357.443	357.194	5	approved
DB00845	C27H22Cl2N4	473.396	472.122	4	approved; investigational
DB00846	C24H33FO6	436.514	436.226	6	approved
DB00847	C2H7NS	77.149	77.0299	1	approved; investigational
DB00848	C11H12N2S	204.291	204.072	2	approved; investigational; vet_approved; withdrawn
DB00849	C13H14N2O3	246.262	246.1	3	approved
DB00850	C21H26ClN3OS	403.969	403.149	4	approved
DB00852	C10H15NO	165.232	165.115	2	approved
DB00853	C6H6N6O2	194.151	194.055	5	approved; investigational
DB00854	C17H23NO	257.371	257.178	2	approved
DB00855	C5H9NO3	131.13	131.058	4	approved
DB00856	C9H11ClO3	202.635	202.04	3	approved; experimental
DB00857	C21H25N	291.43	291.199	1	approved; investigational; vet_approved
DB00858	C20H32O2	304.467	304.24	2	illicit
DB00859	C5H11NO2S	149.211	149.051	3	approved
DB00860	C21H28O5	360.444	360.194	5	approved; vet_approved
DB00861	C13H8F2O3	250.198	250.044	3	approved; investigational
DB00862	C23H32N6O4S	488.603	488.221	8	approved
DB00863	C13H22N4O3S	314.4	314.141	5	approved; withdrawn
DB00865	C17H21N	239.355	239.167	1	approved; illicit
DB00866	C15H23NO2	249.349	249.173	3	experimental; withdrawn
DB00867	C17H21NO3	287.353	287.152	4	approved; investigational
DB00869	C10H16N2O4S3	324.44	324.027	5	approved
DB00870	C14H12O3S	260.308	260.051	3	approved; withdrawn
DB00871	C12H19NO3	225.284	225.136	4	approved
DB00872	C32H26N4O2	498.574	498.206	3	approved; investigational
DB00873	C24H31ClO7	466.96	466.176	5	approved
DB00874	C10H14O4	198.216	198.089	4	approved; investigational; vet_approved
DB00875	C23H25F3N2OS	434.52	434.164	3	approved; investigational; withdrawn
DB00876	C23H24N2O4S	424.513	424.146	5	approved
DB00878	C22H30Cl2N10	505.447	504.203	10	approved; vet_approved
DB00879	C8H10FN3O3S	247.247	247.043	5	approved; investigational
DB00880	C7H6ClN3O4S2	295.723	294.949	6	approved; vet_approved
DB00881	C25H30N2O5	438.516	438.215	5	approved; investigational
DB00882	C26H28ClNO	405.96	405.186	2	approved; investigational
DB00883	C6H8N2O8	236.136	236.028	8	approved; investigational
DB00884	C7H11NO7P2	283.112	283.001	8	approved; investigational
DB00885	C10H8N6O	228.21	228.076	5	approved; investigational
DB00886	C19H24N2O4S2	408.53	408.118	4	investigational
DB00887	C17H20N2O5S	364.416	364.109	5	approved
DB00888	C5H11Cl2N	156.054	155.027	1	approved; investigational
DB00890	C18H18O2	266.34	266.131	2	approved; investigational
DB00891	C11H11N3O2S	249.289	249.057	4	approved
DB00892	C17H28N2O3	308.416	308.21	4	approved; investigational
DB00894	C19H24O3	300.392	300.173	2	approved; investigational
DB00896	C24H34O3	370.533	370.251	3	approved
DB00897	C17H12Cl2N4	343.21	342.044	3	approved; investigational
DB00898	C2H6O	46.0684	46.0419	1	approved
DB00899	C20H28N2O5	376.447	376.2	4	approved
DB00900	C10H12N4O3	236.227	236.091	6	approved
DB00901	C28H31NO5	461.549	461.22	4	withdrawn
DB00902	C18H20N2S	296.43	296.135	2	approved
DB00903	C13H12Cl2O4	303.138	302.011	4	approved; investigational
DB00904	C18H19N3O	293.363	293.153	2	approved
DB00905	C25H37NO4	415.566	415.272	4	approved; investigational
DB00906	C20H25NO2S2	375.548	375.133	3	approved; investigational
DB00907	C17H21NO4	303.353	303.147	3	approved; illicit
DB00908	C20H24N2O2	324.417	324.184	4	approved; investigational
DB00909	C8H8N2O3S	212.226	212.026	3	approved; investigational
DB00910	C27H44O3	416.637	416.329	3	approved; investigational
DB00911	C8H13N3O4S	247.272	247.063	5	approved; investigational
DB00912	C27H36N2O4	452.586	452.268	5	approved; investigational
DB00913	C22H28N2O2	352.47	352.215	3	approved; illicit
DB00914	C10H15N5	205.26	205.133	5	approved; investigational; withdrawn
DB00915	C10H17N	151.249	151.136	1	approved
DB00916	C6H9N3O3	171.154	171.064	4	approved
DB00917	C20H32O5	352.465	352.225	5	approved
DB00918	C17H25N3O2S	335.464	335.167	3	approved; investigational
DB00919	C14H24N2O7	332.35	332.158	9	approved; investigational; vet_approved
DB00920	C19H19NOS	309.425	309.119	2	approved
DB00921	C29H41NO4	467.64	467.304	5	approved; illicit; investigational; vet_approved
DB00922	C14H12N6O	280.285	280.107	6	approved; investigational
DB00923	C20H21N7O6S2	519.554	519.099	10	approved
DB00924	C20H21N	275.387	275.167	1	approved
DB00925	C18H22ClNO	303.826	303.139	2	approved
DB00926	C23H30O3	354.483	354.219	2	withdrawn
DB00927	C8H15N7O2S3	337.445	337.045	8	approved
DB00928	C8H12N4O5	244.205	244.081	8	approved; investigational
DB00929	C22H38O5	382.534	382.272	4	approved
DB00932	C31H33F3N2O5S	602.664	602.206	5	approved; investigational
DB00933	C21H26N2OS2	386.574	386.149	3	approved; investigational
DB00934	C20H23N	277.403	277.183	1	approved; investigational
DB00935	C16H24N2O	260.375	260.189	3	approved; investigational
DB00936	C7H6O3	138.122	138.032	3	approved; investigational; vet_approved
DB00937	C13H19NO	205.296	205.147	2	approved; illicit
DB00939	C14H11Cl2NO2	296.149	295.017	3	approved; vet_approved
DB00940	C21H26NO3	340.436	340.191	1	approved; investigational
DB00941	C36H42N2	502.745	502.334	0	approved
DB00942	C19H29NO	287.44	287.225	2	approved
DB00943	C9H13N3O3	211.218	211.096	5	approved; investigational
DB00945	C9H8O4	180.157	180.042	3	approved; vet_approved
DB00946	C18H16O3	280.318	280.11	2	approved; investigational
DB00947	C32H47F5O3S	606.78	606.317	3	approved; investigational
DB00948	C21H25N5O8S2	539.582	539.114	8	approved; investigational
DB00949	C11H14N2O4	238.24	238.095	2	approved
DB00950	C32H39NO4	501.656	501.288	5	approved; investigational
DB00951	C6H7N3O	137.139	137.059	3	approved; investigational
DB00952	C17H25N3O2S	335.464	335.167	3	approved; investigational
DB00953	C15H19N5	269.345	269.164	3	approved
DB00955	C21H41N5O7	475.587	475.301	12	approved; investigational
DB00956	C18H21NO3	299.364	299.152	4	approved; illicit; investigational
DB00957	C23H31NO3	369.497	369.23	3	approved; investigational
DB00959	C22H30O5	374.471	374.209	5	approved; vet_approved
DB00960	C14H20N2O2	248.321	248.152	3	approved; investigational
DB00961	C15H22N2O	246.348	246.173	2	approved; vet_approved
DB00962	C17H15N5O	305.334	305.128	4	approved; illicit; investigational
DB00963	C15H12BrNO3	334.165	333	4	approved
DB00964	C9H10Cl2N4	245.109	244.028	4	approved
DB00966	C33H30N4O2	514.617	514.237	4	approved; investigational
DB00967	C19H19ClN2	310.821	310.124	2	approved; investigational
DB00968	C10H13NO4	211.214	211.084	5	approved
DB00969	C17H18N4O	294.351	294.148	2	approved; withdrawn
DB00972	C22H24ClN3O	381.898	381.161	3	approved
DB00973	C24H21F2NO3	409.425	409.149	3	approved
DB00974	C10H16N2O8	292.243	292.091	10	approved; vet_approved
DB00975	C24H40N8O4	504.626	504.317	12	approved
DB00977	C20H24O2	296.403	296.178	2	approved
DB00978	C17H19F2N3O3	351.348	351.139	6	approved; investigational
DB00979	C17H25NO3	291.385	291.183	3	approved
DB00980	C16H21NO2	259.343	259.157	2	approved; investigational
DB00981	C15H21N3O2	275.346	275.163	3	approved; investigational
DB00982	C20H28O2	300.435	300.209	2	approved
DB00983	C19H24N2O4	344.405	344.174	5	approved; investigational
DB00984	C27H34O3	406.557	406.251	2	approved; illicit; investigational
DB00986	C19H28NO3	318.43	318.207	2	approved; investigational; vet_approved
DB00987	C9H13N3O5	243.217	243.086	7	approved; investigational
DB00988	C8H11NO2	153.178	153.079	3	approved
DB00989	C14H22N2O2	250.337	250.168	2	approved; investigational
DB00990	C20H24O2	296.403	296.178	2	approved; investigational
DB00991	C18H15NO3	293.317	293.105	3	approved
DB00992	C6H11NO3	145.156	145.074	3	approved; investigational
DB00993	C9H7N7O2S	277.263	277.038	6	approved
DB00996	C9H17NO2	171.237	171.126	3	approved; investigational
DB00997	C27H29NO11	543.519	543.174	12	approved; investigational
DB00998	C14H17N3O	243.304	243.137	2	approved; investigational
DB00999	C7H8ClN3O4S2	297.739	296.964	5	approved; vet_approved
DB01000	C15H23N3O4S	341.426	341.141	5	approved
DB01001	C13H21NO3	239.311	239.152	4	approved; vet_approved
DB01002	C18H28N2O	288.428	288.22	2	approved; investigational
DB01003	C23H16O11	468.366	468.069	11	approved
DB01004	C9H13N5O4	255.231	255.097	7	approved; investigational
DB01005	CH4N2O2	76.0547	76.0273	2	approved
DB01006	C17H11N5	285.303	285.101	4	approved; investigational
DB01007	C16H13Cl3N2OS	387.711	385.981	2	approved
DB01008	C6H14O6S2	246.302	246.023	4	approved; investigational
DB01009	C16H14O3	254.281	254.094	3	approved; vet_approved
DB01010	C10H16NO	166.24	166.123	1	approved
DB01011	C14H14N2O	226.274	226.111	3	approved; investigational
DB01012	C22H22F3N	357.412	357.17	1	approved
DB01013	C25H32ClFO5	466.97	466.192	4	approved
DB01015	C10H11N3O3S	253.278	253.052	4	approved
DB01016	C23H28ClN3O5S	494.004	493.144	5	approved
DB01018	C9H9Cl2N3O	246.093	245.012	3	approved; investigational
DB01019	C7H17N2O2	161.222	161.129	1	approved
DB01020	C6H9NO6	191.139	191.043	6	approved
DB01021	C8H8Cl3N3O4S2	380.656	378.902	5	approved; vet_approved
DB01022	C31H46O2	450.696	450.35	2	approved; investigational
DB01023	C18H19Cl2NO4	384.254	383.069	3	approved; investigational
DB01024	C17H20O6	320.337	320.126	5	approved
DB01025	C16H14N2O4	298.293	298.095	5	approved; investigational; withdrawn
DB01026	C26H28Cl2N4O4	531.431	530.149	6	approved; investigational
DB01028	C3H4Cl2F2O	164.966	163.961	1	approved; investigational; vet_approved
DB01029	C25H28N6O	428.529	428.232	5	approved; investigational
DB01030	C23H23N3O5	421.446	421.164	6	approved; investigational
DB01031	C9H13NO2	167.205	167.095	1	approved; illicit; withdrawn
DB01032	C13H19NO4S	285.359	285.103	4	approved; investigational
DB01033	C5H4N4S	152.177	152.016	3	approved
DB01034	C12H17NO3	223.272	223.121	4	experimental
DB01035	C13H21N3O	235.325	235.168	3	approved
DB01036	C22H31NO	325.488	325.241	2	approved; investigational
DB01037	C13H17N	187.286	187.136	1	approved; investigational; vet_approved
DB01038	C24H31N3O2S	425.59	425.214	5	withdrawn
DB01039	C20H21ClO4	360.831	360.113	3	approved
DB01041	C13H10N2O4	258.229	258.064	4	approved; investigational; withdrawn
DB01042	C13H18Cl2N2O2	305.2	304.075	4	approved
DB01043	C12H21N	179.302	179.167	1	approved; investigational
DB01044	C19H22FN3O4	375.394	375.159	7	approved; investigational
DB01046	C20H32F2O5	390.468	390.222	5	approved; investigational
DB01047	C26H32F2O7	494.525	494.212	6	approved; investigational
DB01048	C14H18N6O	286.332	286.154	6	approved; investigational
DB01050	C13H18O2	206.281	206.131	2	approved
DB01051	C31H36N2O11	612.624	612.232	9	approved; investigational; vet_approved
DB01053	C16H18N2O4S	334.39	334.099	4	approved; vet_approved
DB01054	C18H20N2O6	360.361	360.132	5	approved; investigational
DB01055	C8H10N2O4	198.176	198.064	6	experimental
DB01056	C11H16N2O	192.257	192.126	2	approved
DB01057	C9H23NO3PS	256.323	256.114	1	approved
DB01058	C19H24N2O2	312.406	312.184	2	approved; investigational; vet_approved
DB01059	C16H18FN3O3	319.331	319.133	6	approved
DB01060	C16H19N3O5S	365.404	365.105	6	approved; vet_approved
DB01061	C20H23N5O6S	461.492	461.137	6	approved
DB01062	C22H31NO3	357.486	357.23	3	approved; investigational
DB01063	C23H29N3O2S	411.56	411.198	5	approved
DB01064	C11H17NO3	211.258	211.121	4	approved; investigational
DB01065	C13H16N2O2	232.278	232.121	2	approved; nutraceutical; vet_approved
DB01066	C19H18N6O5S3	506.578	506.05	9	approved; investigational
DB01067	C21H27N5O4S	445.535	445.178	6	approved; investigational
DB01068	C15H10ClN3O3	315.711	315.041	4	approved; illicit
DB01069	C17H20N2S	284.419	284.135	2	approved; investigational
DB01070	C28H46O	398.664	398.355	1	approved
DB01071	C20H22N2S	322.467	322.15	2	experimental
DB01073	C10H12FN5O4	285.235	285.087	8	approved
DB01074	C19H35N	277.488	277.277	1	approved; investigational
DB01075	C17H21NO	255.355	255.162	2	approved; investigational
DB01076	C33H35FN2O5	558.64	558.253	5	approved
DB01077	C2H8O7P2	206.027	205.975	7	approved
DB01080	C6H11NO2	129.157	129.079	3	approved
DB01081	C30H32N2O2	452.587	452.246	3	approved; illicit
DB01082	C21H39N7O12	581.574	581.266	19	approved; vet_approved
DB01084	C17H26N4O	302.414	302.211	4	approved
DB01085	C11H16N2O2	208.257	208.121	2	approved; investigational
DB01086	C9H11NO2	165.189	165.079	2	approved; investigational
DB01087	C15H21N3O	259.347	259.168	4	approved
DB01088	C22H32O4	360.494	360.23	4	approved; investigational
DB01089	C32H38N2O8	578.653	578.263	7	approved
DB01090	C15H32N2	240.428	240.257	0	approved
DB01091	C23H27N	317.467	317.214	1	approved
DB01092	C29H44O12	584.653	584.283	11	approved
DB01093	C2H6OS	78.133	78.0139	1	approved; vet_approved
DB01094	C16H14O6	302.279	302.079	6	experimental
DB01095	C24H26FNO4	411.466	411.185	4	approved
DB01096	C14H21N3O3	279.335	279.158	5	approved
DB01097	C12H9F3N2O2	270.207	270.062	2	approved; investigational
DB01098	C22H28FN3O6S	481.538	481.168	8	approved
DB01099	C4H4FN3O	129.093	129.034	3	approved; investigational
DB01100	C28H29F2N3O	461.546	461.228	2	approved
DB01101	C15H22FN3O6	359.35	359.149	6	approved; investigational
DB01102	C18H23NO4	317.38	317.163	5	approved
DB01103	C23H30ClN3O	399.957	399.208	4	investigational
DB01104	C17H17Cl2N	306.23	305.074	1	approved
DB01105	C17H26ClN	279.848	279.175	1	approved; illicit; investigational; withdrawn
DB01107	C10H17NO2	183.248	183.126	2	approved; illicit; withdrawn
DB01108	C20H27NO3	329.433	329.199	4	approved; investigational; vet_approved; withdrawn
DB01110	C18H14Cl4N2O	416.129	413.986	2	approved; investigational; vet_approved
DB01112	C16H16N4O8S	424.385	424.069	7	approved
DB01113	C20H21NO4	339.385	339.147	5	approved; investigational
DB01114	C16H19ClN2	274.788	274.124	2	approved
DB01115	C17H18N2O6	346.335	346.116	5	approved
DB01116	C22H25N2OS	365.512	365.169	1	approved; investigational
DB01118	C25H29I2NO3	645.312	645.024	3	approved; investigational
DB01119	C8H7ClN2O2S	230.671	229.992	4	approved
DB01120	C15H21N3O3S	323.411	323.13	4	approved
DB01121	C9H10N2O2	178.188	178.074	2	approved
DB01123	C13H11N3	209.246	209.095	3	approved
DB01124	C12H18N2O3S	270.348	270.104	3	approved; investigational
DB01125	C16H12O3	252.265	252.079	3	approved
DB01126	C27H30F6N2O2	528.53	528.221	2	approved; investigational
DB01127	C18H15Cl3N2O	381.684	380.025	2	approved
DB01128	C18H14F4N2O4S	430.373	430.061	5	approved
DB01129	C18H21N3O3S	359.443	359.13	5	approved; investigational
DB01130	C27H36O8	488.577	488.241	6	approved; investigational
DB01131	C11H16ClN5	253.731	253.109	5	approved
DB01132	C19H20N2O3S	356.439	356.119	4	approved; investigational
DB01133	C7H9ClO6P2S	318.608	317.928	6	approved; investigational; vet_approved
DB01134	C26H38O4	414.586	414.277	3	experimental; vet_approved
DB01136	C24H26N2O4	406.474	406.189	5	approved; investigational
DB01137	C18H20FN3O4	361.368	361.144	7	approved; investigational
DB01138	C23H20N2O3S	404.482	404.119	3	approved
DB01139	C17H17N3O6S2	423.463	423.056	6	approved; vet_approved
DB01140	C16H17N3O5S	363.388	363.089	6	approved; vet_approved; withdrawn
DB01142	C19H21NO	279.376	279.162	2	approved; investigational
DB01143	C5H15N2O3PS	214.223	214.054	5	approved; investigational
DB01144	C6H6Cl2N2O4S2	305.159	303.915	4	approved; investigational
DB01145	C14H16N2O6S3	404.482	404.017	8	approved
DB01146	C19H23NO	281.392	281.178	2	approved; investigational
DB01147	C19H18ClN3O5S	435.881	435.066	5	approved; investigational; vet_approved
DB01148	C24H25NO4	391.46	391.178	4	approved
DB01149	C25H32ClN5O2	470.007	469.224	5	approved; withdrawn
DB01150	C18H19N3O5S	389.426	389.105	6	approved
DB01151	C18H22N2	266.381	266.178	2	approved; investigational
DB01153	C20H15Cl3N2OS	437.77	435.997	2	approved; investigational
DB01154	C12H18N2O2S	254.349	254.109	2	approved; vet_approved
DB01155	C18H20FN5O4	389.381	389.15	9	approved; investigational
DB01156	C13H18ClNO	239.741	239.108	2	approved
DB01157	C19H23N5O3	369.418	369.18	8	approved; investigational
DB01158	C11H17BrN	243.163	242.054	0	approved
DB01159	C2HBrClF3	197.382	195.89	0	approved; vet_approved
DB01161	C13H19ClN2O2	270.755	270.114	3	approved
DB01162	C19H25N5O4	387.433	387.191	8	approved
DB01163	C15H23N3O3S	325.426	325.146	5	investigational; withdrawn
DB01165	C18H20FN3O4	361.368	361.144	7	approved
DB01166	C20H27N5O2	369.461	369.216	5	approved; investigational
DB01167	C35H38Cl2N8O4	705.633	704.239	9	approved; investigational
DB01168	C12H19N3O	221.299	221.153	3	approved; investigational
DB01170	C10H22N4	198.309	198.184	4	approved
DB01171	C13H17ClN2O2	268.739	268.098	3	approved; investigational
DB01172	C18H36N4O11	484.499	484.238	15	approved; investigational; vet_approved
DB01173	C18H23NO	269.381	269.178	2	approved
DB01174	C12H12N2O3	232.235	232.085	3	approved; investigational
DB01175	C20H21FN2O	324.392	324.164	3	approved
DB01176	C18H22N2	266.381	266.178	2	approved
DB01177	C26H27NO9	497.494	497.169	10	approved
DB01178	C11H12ClNO3S	273.736	273.023	3	approved; investigational; withdrawn
DB01179	C22H22O8	414.405	414.131	7	approved
DB01180	C35H42N2O9	634.716	634.289	8	approved
DB01181	C7H15Cl2N2O2P	261.086	260.025	2	approved
DB01182	C21H27NO3	341.444	341.199	4	approved
DB01183	C19H21NO4	327.374	327.147	5	approved; vet_approved
DB01184	C22H24ClN5O2	425.911	425.162	3	approved; investigational; vet_approved
DB01185	C20H29FO3	336.441	336.21	3	approved; illicit
DB01186	C19H26N2S	314.488	314.182	1	approved; investigational; vet_approved; withdrawn
DB01187	C19H29IO2	416.337	416.121	1	approved
DB01188	C12H17NO2	207.269	207.126	2	approved; investigational
DB01189	C3H2F6O	168.038	168.001	1	approved
DB01190	C18H33ClN2O5S	424.983	424.18	6	approved; vet_approved
DB01191	C12H16F3N	231.257	231.123	1	approved; illicit; investigational; withdrawn
DB01192	C17H19NO4	301.337	301.131	5	approved; investigational; vet_approved
DB01193	C18H28N2O4	336.426	336.205	5	approved; investigational
DB01194	C12H21N3O5S3	383.507	383.064	6	approved
DB01195	C17H20F6N2O3	414.343	414.138	4	approved; withdrawn
DB01196	C23H31Cl2NO3	440.403	439.168	2	approved; investigational
DB01197	C9H15NO3S	217.285	217.077	3	approved
DB01198	C17H17ClN6O3	388.808	388.105	6	approved
DB01199	C37H41N2O6	609.731	609.296	5	approved
DB01200	C32H40BrN5O5	654.595	653.221	6	approved; investigational
DB01202	C8H14N2O2	170.212	170.106	2	approved
DB01203	C17H27NO4	309.401	309.194	5	approved
DB01204	C22H28N4O6	444.481	444.201	10	approved; investigational
DB01205	C15H14FN3O3	303.288	303.102	3	approved
DB01206	C9H16ClN3O2	233.695	233.093	2	approved; investigational
DB01207	C18H17F3N2O3	366.334	366.119	5	experimental
DB01208	C19H22F2N4O3	392.4	392.166	7	approved; investigational; withdrawn
DB01209	C16H23NO	245.36	245.178	2	approved; investigational
DB01210	C17H25NO3	291.385	291.183	4	approved
DB01212	C18H18N8O7S3	554.58	554.046	12	approved
DB01213	C4H6N2	82.1038	82.0531	1	approved; vet_approved
DB01214	C17H27NO4	309.401	309.194	4	approved
DB01215	C16H11ClN4	294.738	294.067	3	approved; illicit
DB01216	C23H36N2O2	372.544	372.278	2	approved
DB01217	C17H19N5	293.366	293.164	4	approved; investigational
DB01218	C26H30Cl2F3NO	500.424	499.166	2	approved
DB01219	C14H10N4O5	314.257	314.065	5	approved; investigational
DB01221	C13H16ClNO	237.725	237.092	2	approved; vet_approved
DB01222	C25H34O6	430.534	430.236	6	approved
DB01224	C21H25N3O2S	383.507	383.167	5	approved
DB01227	C23H31NO2	353.498	353.235	2	approved; investigational
DB01228	C22H28N2O2	352.47	352.215	3	approved; investigational; withdrawn
DB01230	C9H8N2O2	176.172	176.059	4	approved; illicit; investigational; withdrawn
DB01231	C21H27NO	309.445	309.209	2	approved; investigational; withdrawn
DB01233	C14H22ClN3O2	299.796	299.14	4	approved; investigational
DB01234	C22H29FO5	392.461	392.2	5	approved; investigational; vet_approved
DB01235	C9H11NO4	197.188	197.069	5	approved
DB01236	C4H3F7O	200.055	200.007	1	approved; vet_approved
DB01237	C17H20BrNO	334.251	333.073	2	approved
DB01238	C23H27Cl2N3O2	448.385	447.148	4	approved; investigational
DB01239	C18H18ClNS	315.86	315.085	1	approved; experimental; investigational; withdrawn
DB01240	C20H32O5	352.465	352.225	5	approved
DB01241	C15H22O3	250.333	250.157	3	approved
DB01242	C19H23ClN2	314.852	314.155	2	approved; investigational; vet_approved
DB01243	C9H5Cl2NO	214.048	212.975	2	approved
DB01244	C24H34N2O	366.54	366.267	3	approved; withdrawn
DB01245	C16H38N2	258.486	258.303	0	approved
DB01246	C18H22N2S	298.446	298.15	2	approved; vet_approved
DB01247	C12H13N3O2	231.25	231.101	3	approved
DB01251	C27H33N3O6S	527.632	527.209	6	approved; investigational
DB01252	C19H25NO3	315.413	315.183	3	investigational
DB01253	C19H23N3O2	325.405	325.179	3	approved
DB01254	C22H26ClN7O2S	488.006	487.156	8	approved; investigational
DB01255	C15H25N3O	263.378	263.2	3	approved; investigational
DB01259	C29H26ClFN4O4S	581.058	580.135	7	approved; investigational
DB01260	C24H32O6	416.507	416.22	6	approved; investigational
DB01261	C16H15F6N5O	407.314	407.118	4	approved; investigational
DB01262	C8H12N4O4	228.205	228.086	7	approved; investigational
DB01264	C27H37N3O7S	547.664	547.235	7	approved
DB01265	C10H14N2O5	242.229	242.09	5	approved; investigational
DB01267	C23H27FN4O3	426.484	426.207	5	approved
DB01268	C22H27FN4O2	398.474	398.212	3	approved; investigational
DB01273	C13H13N3	211.268	211.111	3	approved; investigational
DB01274	C19H24N2O4	344.405	344.174	5	approved; investigational
DB01275	C8H8N4	160.176	160.075	4	approved
DB01280	C11H15N5O5	297.267	297.107	9	approved; investigational
DB01283	C15H13ClFNO2	293.721	293.062	3	approved; investigational
DB01288	C17H21NO4	303.353	303.147	5	approved; investigational
DB01289	C20H27N5O5S	449.524	449.173	6	investigational
DB01291	C12H20N2O3	240.299	240.147	5	approved
DB01295	C20H27NO4	345.433	345.194	5	experimental
DB01296	C6H13NO5	179.171	179.079	6	approved; investigational
DB01297	C14H22N2O3	266.336	266.163	4	approved
DB01298	C12H14N4O3S	294.33	294.079	5	approved
DB01299	C12H14N4O4S	310.329	310.074	7	approved; investigational
DB01319	C25H36N3O9PS	585.607	585.191	8	approved
DB01320	C16H15N2O6P	362.274	362.067	5	approved; investigational
DB01322	C14H16O3	232.275	232.11	2	approved; investigational; nutraceutical
DB01324	C11H13ClF3N3O4S3	439.882	438.971	5	approved
DB01325	C10H12ClN3O3S	289.739	289.029	4	approved
DB01326	C18H18N6O5S2	462.503	462.078	8	approved; experimental
DB01327	C14H14N8O4S3	454.507	454.03	9	approved
DB01328	C18H18N6O8S3	542.566	542.035	11	approved; investigational
DB01329	C25H27N9O8S2	645.67	645.142	11	approved; investigational
DB01331	C16H17N3O7S2	427.452	427.051	6	approved
DB01332	C13H13N5O5S2	383.403	383.036	8	approved; withdrawn
DB01333	C16H19N3O4S	349.405	349.11	5	approved
DB01336	C40H48N2O6	652.819	652.351	4	approved
DB01337	C35H60N2O4	572.862	572.455	2	approved
DB01338	C35H62N4O4	602.891	602.477	4	approved
DB01339	C34H57N2O4	557.827	557.432	3	approved; investigational
DB01340	C22H31N3O5	417.499	417.226	6	approved
DB01342	C23H28N8	416.522	416.244	6	experimental
DB01347	C25H22BrF3N4O4S	611.431	610.05	4	experimental
DB01348	C22H30N2O5S2	466.614	466.16	5	approved
DB01349	C23H21N7O	411.459	411.181	6	experimental
DB01351	C11H18N2O3	226.272	226.132	3	approved; illicit
DB01352	C10H14N2O3	210.23	210.1	3	experimental; illicit
DB01353	C10H16N2O3	212.246	212.116	3	approved; illicit
DB01354	C13H18N2O3	250.294	250.132	3	experimental
DB01355	C12H16N2O3	236.267	236.116	3	experimental
DB01357	C21H26O2	310.43	310.193	2	approved
DB01359	C18H29NO2	291.428	291.22	3	approved; investigational
DB01362	C19H26I3N3O9	821.138	820.88	9	approved
DB01364	C10H15NO	165.232	165.115	2	approved
DB01365	C11H17N	163.259	163.136	1	approved
DB01366	C16H22N2O3	290.358	290.163	4	approved; investigational
DB01367	C12H13N	171.238	171.105	1	approved
DB01380	C23H30O6	402.481	402.204	5	approved; investigational
DB01382	C13H15N3O4S	309.341	309.078	6	approved; investigational
DB01384	C22H29FO5	392.461	392.2	5	experimental
DB01388	C29H38FN3O3	495.629	495.29	4	investigational; withdrawn
DB01392	C21H26N2O3	354.443	354.194	3	approved; investigational; vet_approved
DB01393	C19H20ClNO4	361.819	361.108	4	approved; investigational
DB01394	C22H25NO6	399.437	399.168	6	approved
DB01395	C24H30O3	366.493	366.219	2	approved
DB01399	C14H10O5	258.226	258.053	4	approved
DB01400	C12H19N2O2	223.292	223.145	1	approved; vet_approved
DB01403	C19H24N2OS	328.472	328.161	3	approved; investigational
DB01405	C21H18F3N3O3	417.381	417.13	6	withdrawn
DB01406	C22H27NO2	337.455	337.204	2	approved
DB01407	C12H18Cl2N2O	277.19	276.08	3	approved; investigational; vet_approved
DB01408	C18H29N3O5	367.44	367.211	4	investigational
DB01410	C32H44O7	540.697	540.309	6	approved; investigational
DB01411	C27H23N5O4	481.512	481.175	7	investigational
DB01412	C7H8N4O2	180.164	180.065	3	investigational
DB01413	C19H24N6O5S2	480.561	480.125	8	approved; investigational
DB01414	C13H13N3O6S	339.324	339.053	6	experimental; vet_approved
DB01415	C15H14N4O6S2	410.425	410.035	8	approved; investigational
DB01416	C15H17N5O6S2	427.455	427.062	9	approved; vet_approved
DB01418	C19H15NO6	353.325	353.09	5	approved; investigational
DB01419	C30H26F6N4O2	588.543	588.196	5	approved
DB01420	C22H32O3	344.488	344.235	2	approved; investigational; vet_approved; withdrawn
DB01421	C23H45N5O14	615.629	615.296	19	approved; investigational
DB01422	C9H6N2O3	190.155	190.038	4	experimental
DB01423	C10H11NO4S2	273.329	273.013	4	experimental
DB01424	C13H17N3O	231.294	231.137	3	approved; withdrawn
DB01425	C16H21N5O2	315.37	315.17	5	investigational
DB01426	C20H26N2O2	326.433	326.199	4	approved; experimental
DB01427	C10H9N3O	187.198	187.075	3	approved
DB01428	C14H12O3	228.243	228.079	3	approved; investigational
DB01429	C22H30N2	322.487	322.241	2	experimental
DB01430	C26H29F2N7	477.552	477.245	7	approved
DB01431	C21H32O	300.478	300.245	1	experimental
DB01433	C23H31NO2	353.498	353.235	2	experimental; illicit
DB01434	C18H24O2	272.382	272.178	2	experimental; illicit
DB01435	C11H12N2O	188.226	188.095	2	approved; investigational
DB01436	C27H44O2	400.637	400.334	2	approved; nutraceutical
DB01437	C13H15NO2	217.264	217.11	2	approved; illicit
DB01439	C21H28N2OS	356.525	356.192	2	experimental; illicit
DB01440	C4H8O3	104.105	104.047	3	approved; illicit; investigational
DB01441	C17H26N2O	274.401	274.205	2	experimental; illicit
DB01442	C11H15NO3	209.242	209.105	4	experimental; illicit
DB01443	C18H24O2	272.388	272.178	2	experimental; illicit
DB01444	C14H17NS2	263.421	263.08	1	experimental; illicit
DB01445	C12H16N2O	204.268	204.126	2	experimental; illicit
DB01446	C11H14N2	174.242	174.116	1	experimental; illicit
DB01447	C10H12N2O	176.215	176.095	3	experimental; illicit
DB01450	C25H35NO4	413.55	413.257	5	experimental; illicit
DB01451	C19H26O2	286.415	286.193	2	experimental; illicit
DB01452	C21H23NO5	369.411	369.158	4	approved; illicit; investigational
DB01453	C22H28N2O2	352.47	352.215	3	experimental; illicit
DB01454	C11H15NO2	193.242	193.11	3	experimental; illicit; investigational
DB01455	C18H28O2	276.414	276.209	2	experimental; illicit
DB01456	C19H26O2	286.415	286.193	2	experimental; illicit
DB01458	C13H21NO2S	255.38	255.129	3	experimental; illicit
DB01459	C31H32N4O2	492.611	492.253	4	experimental; illicit; withdrawn
DB01460	C14H20N2	216.322	216.163	1	experimental; illicit
DB01461	C20H25NO3	327.417	327.183	3	experimental; illicit
DB01462	C22H28N4O3	396.483	396.216	5	experimental; illicit
DB01463	C15H21N	215.334	215.167	1	experimental; illicit; withdrawn
DB01464	C21H31NO4	361.475	361.225	4	experimental; illicit
DB01465	C11H17NO2	195.258	195.126	3	experimental; illicit
DB01466	C19H23NO3	313.391	313.168	4	experimental; illicit
DB01467	C13H21NO2	223.311	223.157	3	experimental; illicit
DB01468	C15H19NS2	277.448	277.096	1	experimental; illicit
DB01469	C27H35NO5	453.579	453.252	5	experimental; illicit
DB01470	C21H28N2OS	356.525	356.192	2	illicit
DB01471	C21H32O2	316.478	316.24	2	experimental; illicit
DB01472	C10H15NO	165.232	165.115	2	experimental; illicit
DB01473	C16H23NO2	261.365	261.173	2	experimental; illicit
DB01474	C20H32O2	304.474	304.24	2	experimental; illicit
DB01475	C22H27NO3	353.455	353.199	3	experimental; illicit
DB01476	C17H14BrFN2O2	377.208	376.022	3	experimental; illicit
DB01478	C15H21NO2	247.333	247.157	2	experimental; illicit
DB01479	C20H34O2	306.49	306.256	2	experimental; illicit
DB01480	C26H33NO4	423.553	423.241	5	experimental; illicit
DB01481	C19H28O2	288.424	288.209	2	experimental; illicit; investigational
DB01482	C18H23N5O2	341.415	341.185	4	experimental
DB01483	C8H12N2O3	184.192	184.085	3	illicit
DB01484	C11H16BrNO2	274.154	273.036	3	experimental; illicit
DB01485	C19H28O3	304.43	304.204	3	experimental; illicit
DB01486	C9H13NO	151.206	151.1	2	experimental; illicit
DB01487	C17H27NO3	293.401	293.199	3	experimental; illicit
DB01488	C12H16N2	188.269	188.131	1	experimental; illicit
DB01489	C19H18ClN3O3	371.818	371.104	3	experimental; illicit
DB01490	C9H10N2O	162.189	162.079	3	experimental; illicit
DB01491	C24H31NO	349.509	349.241	2	experimental; illicit
DB01493	C20H32O	288.467	288.245	1	withdrawn
DB01496	C16H11F3N2O3S	368.33	368.044	2	experimental; illicit
DB01497	C25H33NO4	411.534	411.241	5	illicit; vet_approved
DB01498	C21H29NO	311.461	311.225	2	experimental; illicit
DB01499	C17H25NO2	275.386	275.189	2	experimental; illicit
DB01500	C18H26O3	290.403	290.188	3	experimental; illicit
DB01501	C28H28N2O2	424.534	424.215	4	approved; illicit
DB01502	C21H28N2O	324.46	324.22	2	experimental; illicit
DB01503	C19H30O2	290.447	290.225	2	experimental; illicit
DB01505	C18H27NO4	321.411	321.194	4	experimental; illicit
DB01506	C12H17N	175.27	175.136	1	experimental; illicit
DB01509	C10H13NO2	179.216	179.095	3	experimental; illicit
DB01511	C15H10Cl2N2O	305.159	304.017	2	experimental; illicit
DB01512	C17H21NO4	303.353	303.147	5	experimental; illicit
DB01513	C20H34O2	306.49	306.256	2	experimental; illicit
DB01514	C20H30N2O2	330.464	330.231	3	illicit
DB01515	C16H19NO4	289.326	289.131	4	experimental; illicit
DB01516	C12H19NO3	225.284	225.136	4	experimental; illicit
DB01518	C23H29NO3	367.481	367.215	3	experimental; illicit
DB01520	C15H23NS	249.415	249.155	1	experimental; illicit; investigational
DB01521	C19H27ClO2	322.869	322.17	2	experimental; illicit
DB01522	C23H31NO2	353.498	353.235	2	experimental; illicit
DB01523	C20H23ClN4O2	386.875	386.151	4	experimental; illicit
DB01524	C19H30O2	290.44	290.225	2	experimental; illicit
DB01525	C9H15NO3	185.22	185.105	4	experimental; illicit
DB01526	C19H30O2	290.44	290.225	2	experimental; illicit
DB01527	C10H14ClN	183.678	183.081	1	experimental
DB01528	C12H19NO2	209.285	209.142	3	experimental; illicit
DB01529	C25H32N2O2	392.543	392.246	3	experimental; illicit
DB01530	C19H32O2	292.456	292.24	2	experimental; illicit
DB01531	C17H21NO2	271.36	271.157	3	experimental; illicit
DB01532	C22H28N2O	336.471	336.22	2	illicit
DB01533	C16H21NS2	291.475	291.112	1	experimental; illicit
DB01534	C8H15Cl3O3	265.562	264.009	3	experimental; illicit
DB01535	C24H30N2O3	394.507	394.226	3	illicit; investigational; vet_approved
DB01536	C19H26O2	286.409	286.193	2	experimental; illicit
DB01537	C10H14BrNO2	260.128	259.021	3	experimental; illicit
DB01538	C20H25NO4	343.417	343.178	4	experimental; illicit
DB01539	C12H20N2	192.301	192.163	2	experimental; illicit
DB01540	C19H28O3	304.43	304.204	3	illicit
DB01541	C19H26O2	286.409	286.193	2	illicit; vet_approved
DB01542	C18H25NO2	287.397	287.189	2	experimental; illicit
DB01543	C19H28O2	288.431	288.209	2	experimental; illicit
DB01544	C16H12FN3O3	313.283	313.086	4	approved; illicit
DB01545	C18H14ClFN2O3	360.767	360.068	3	experimental; illicit
DB01546	C12H16N2	188.269	188.131	1	illicit; investigational; withdrawn
DB01547	C19H27NO4	333.422	333.194	5	experimental; illicit
DB01548	C26H35NO4	425.569	425.257	5	illicit; vet_approved
DB01549	C16H23N	229.361	229.183	1	experimental; illicit
DB01550	C12H16N2	188.269	188.131	2	experimental; illicit; withdrawn
DB01551	C18H23NO3	301.38	301.168	4	approved; illicit
DB01552	C17H25NO2	275.392	275.189	2	experimental; illicit
DB01553	C17H14Cl2N2O2	349.211	348.043	3	experimental
DB01554	C18H28O2	276.42	276.209	2	experimental; illicit
DB01555	C23H31NO2	353.498	353.235	2	experimental; illicit
DB01556	C10H14ClN	183.678	183.081	1	illicit; withdrawn
DB01557	C23H30N2O	350.497	350.236	2	illicit
DB01558	C14H10BrN3O	316.153	315.001	3	approved; illicit; investigational
DB01559	C16H15ClN2OS	318.821	318.059	2	approved; illicit
DB01560	C9H11NO	149.19	149.084	2	illicit
DB01561	C19H28O2	288.424	288.209	2	experimental; illicit
DB01562	C21H25NO2	323.429	323.189	2	experimental; illicit
DB01563	C2H3Cl3O2	165.403	163.92	2	approved; illicit; investigational; vet_approved
DB01564	C21H32O2	316.478	316.24	2	experimental; illicit
DB01565	C17H21NO3	287.353	287.152	4	experimental; illicit
DB01566	C12H17NO2	207.269	207.126	3	experimental; illicit
DB01567	C16H12ClFN2O	302.731	302.062	2	experimental; illicit
DB01568	C18H21NO4	315.364	315.147	4	experimental; illicit
DB01569	C21H28O4	344.445	344.199	4	experimental; illicit
DB01570	C23H30N2O2	366.497	366.231	3	illicit
DB01571	C23H30N2O	350.497	350.236	2	illicit
DB01572	C20H30O2	302.458	302.225	2	experimental; illicit
DB01573	C24H25NO3	375.46	375.183	4	experimental; illicit
DB01576	C9H13N	135.206	135.105	1	approved; illicit
DB01577	C10H15N	149.233	149.12	1	approved; illicit
DB01578	C18H22I3N3O8	789.1	788.854	8	experimental
DB01579	C12H17NO	191.274	191.131	2	approved; illicit
DB01580	C15H23NO3	265.348	265.168	4	approved
DB01581	C11H12N4O2S	264.304	264.068	5	approved; vet_approved
DB01582	C12H14N4O2S	278.33	278.084	5	approved; investigational; vet_approved
DB01586	C24H40O4	392.572	392.293	4	approved; investigational
DB01587	C20H17ClN2O3	368.814	368.093	3	approved
DB01588	C19H17ClN2O	324.804	324.103	2	approved; illicit
DB01589	C17H11ClF4N2S	386.794	386.027	1	approved; illicit
DB01591	C23H26N2O2	362.473	362.199	2	approved
DB01594	C18H13ClFN3O2	357.766	357.068	4	experimental
DB01595	C15H11N3O3	281.266	281.08	4	approved
DB01597	C16H26N2O5S	358.453	358.156	6	approved; investigational
DB01598	C12H17N3O4S	299.346	299.094	6	approved
DB01599	C31H48O2S2	516.842	516.31	2	approved; investigational
DB01600	C14H12O3S	260.308	260.051	3	approved
DB01602	C21H27N3O7S	465.52	465.157	6	approved; investigational
DB01603	C17H20N2O6S	380.415	380.104	6	approved; investigational
DB01604	C22H29N3O6S	463.547	463.178	5	approved
DB01605	C21H33N3O5S	439.569	439.214	5	approved
DB01606	C10H12N4O5S	300.291	300.053	7	approved
DB01607	C15H16N2O6S2	384.427	384.045	6	approved; investigational; vet_approved
DB01608	C21H23N3OS	365.492	365.156	4	approved; investigational
DB01610	C14H22N6O5	354.362	354.165	9	approved; investigational
DB01611	C18H26ClN3O	335.872	335.176	4	approved
DB01612	C5H11NO2	117.146	117.079	2	approved
DB01613	C4H6N4O12	302.11	301.998	12	approved; experimental; investigational
DB01614	C19H22N2OS	326.456	326.145	3	experimental; vet_approved
DB01615	C19H22N2OS	326.456	326.145	3	experimental
DB01616	C20H27N	281.435	281.214	1	approved; investigational
DB01618	C16H24N2O2	276.374	276.184	3	approved
DB01619	C19H19N	261.361	261.152	1	approved
DB01620	C16H20N2	240.343	240.163	2	approved
DB01621	C24H33N3O3S2	475.667	475.196	5	approved; investigational
DB01622	C22H30N4O2S2	446.629	446.181	5	experimental
DB01623	C23H29N3O2S2	443.625	443.17	4	approved
DB01624	C22H25ClN2OS	400.965	400.138	3	approved; investigational
DB01625	C23H33N2O	353.521	353.259	1	approved; vet_approved
DB01626	C11H13N	159.228	159.105	1	approved
DB01627	C18H34N2O6S	406.54	406.214	7	approved; vet_approved
DB01628	C18H15ClN2O2S	358.842	358.054	4	approved; investigational
DB01629	C9H11FN2O6	262.192	262.06	6	experimental
DB01631	C10H20O2	172.265	172.146	1	experimental
DB01632	C5H13O14P3	390.07	389.952	11	approved; experimental; investigational
DB01633	C18H31FO15	506.428	506.165	15	experimental; investigational
DB01634	C14H16N4O4	304.301	304.117	8	experimental
DB01635	C6H11NO2S	161.222	161.051	3	experimental
DB01637	C20H42O	298.547	298.324	1	experimental; investigational
DB01638	C6H14O6	182.172	182.079	6	approved
DB01639	C9H13NO6P	262.176	262.048	5	experimental
DB01640	C24H24IN3O2	513.371	513.091	4	experimental
DB01641	C17H19N5O4	357.364	357.144	7	experimental
DB01642	C7H14O6	194.183	194.079	6	experimental
DB01643	C10H15N2O8P	322.209	322.057	7	experimental
DB01644	C16H14O5	286.279	286.084	4	experimental
DB01645	C15H10O5	270.24	270.053	5	investigational
DB01646	C7H13NO3S	191.248	191.062	3	experimental
DB01647	C14H19NO4	265.305	265.131	3	experimental
DB01648	C7H14O5S	210.248	210.056	5	experimental
DB01650	C9H8O3	164.158	164.047	3	experimental
DB01651	C10H16O8	264.229	264.085	8	experimental
DB01655	C6H13O10P	276.135	276.025	9	experimental
DB01656	C17H14Cl2F2N2O3	403.207	402.035	4	approved
DB01658	C13H19N3O7P2S	423.318	423.042	7	experimental
DB01659	C15H13N3O2	267.283	267.101	5	experimental
DB01661	C15H25N5O20P4	719.275	719.004	20	experimental
DB01662	C10H12O3	180.201	180.079	3	experimental
DB01664	C6H8N2O4	172.139	172.048	5	experimental
DB01665	C7H7N3	133.151	133.064	3	experimental
DB01667	C4H4N6O	152.114	152.045	5	experimental
DB01668	C16H12O6	300.263	300.063	5	experimental
DB01669	C28H35N3O7	525.593	525.248	6	experimental
DB01670	C5H10O2	102.132	102.068	1	experimental
DB01672	C7H6O4	154.121	154.027	4	experimental
DB01674	C17H19FN4O4	362.356	362.139	6	experimental
DB01676	C7H5N3O6	227.131	227.018	6	experimental
DB01677	C4H4O4	116.072	116.011	4	experimental; investigational
DB01678	C31H34N3O8P	607.591	607.208	7	experimental
DB01679	C3H10O7P2	220.055	219.99	5	experimental
DB01681	C12H6O12	342.169	341.986	12	experimental
DB01682	C13H20N4O7P2S	438.333	438.053	8	experimental
DB01684	C3H8O3S	124.159	124.019	3	experimental
DB01685	C13H8N6	248.243	248.081	5	experimental
DB01686	C8H18N4O2	202.254	202.143	6	experimental
DB01687	C12H22O11	342.296	342.116	11	experimental
DB01688	C7H8O	108.138	108.058	1	experimental
DB01689	C19H22N2O5S	390.453	390.125	5	experimental
DB01690	C20H27N10O16P3	756.407	756.082	20	experimental
DB01691	C22H22N4O2	374.436	374.174	3	experimental
DB01692	C4H10O2S2	154.251	154.012	2	experimental
DB01694	C4H6O6	150.087	150.016	6	experimental
DB01695	C4H8NO5P	181.084	181.014	5	experimental
DB01697	C18H32O16	504.437	504.169	16	experimental
DB01698	C27H30O16	610.518	610.153	16	approved; experimental; investigational
DB01699	C6H11NO2	129.157	129.079	3	experimental
DB01700	C9H15N4O8P	338.211	338.063	9	experimental; investigational
DB01701	C3H6Cl2	112.986	111.985	0	experimental
DB01702	C8H8O4	168.147	168.042	4	experimental
DB01704	C9H8O4	180.157	180.042	4	experimental
DB01705	C17H19N8	335.386	335.173	3	experimental
DB01706	C5H2BrClN4	233.453	231.915	3	experimental
DB01708	C19H28O2	288.424	288.209	2	approved; investigational; nutraceutical
DB01709	C3H7O7P	186.057	185.993	6	experimental
DB01711	C7H3F5O	198.09	198.01	1	experimental
DB01712	C23H28N2O5S2	476.609	476.144	4	experimental
DB01713	C14H22N2O16P2	536.276	536.044	13	experimental
DB01714	C7H16N2O2	160.214	160.121	4	experimental
DB01715	C9H20N2O2	188.267	188.152	4	experimental
DB01716	C14H23NO8	333.334	333.142	8	experimental
DB01718	C19H42N	284.543	284.332	0	approved
DB01720	C22H16BrNO4	438.271	437.026	3	experimental
DB01721	C39H50N4O6	670.851	670.373	8	experimental
DB01724	C4H11NO2	105.136	105.079	3	experimental
DB01726	C6H7NO	109.126	109.053	2	experimental
DB01727	C6H8O7	192.124	192.027	7	experimental
DB01729	C6H15O15P3	420.096	419.962	12	experimental
DB01731	C17H18Br2N2O	426.146	423.979	2	experimental
DB01732	C33H34N2O5	538.634	538.247	5	experimental
DB01733	C3H7O6P	170.058	169.998	5	experimental
DB01734	C13H9NO5	259.214	259.048	5	experimental
DB01735	C3H6ClNO2	123.538	123.009	2	experimental
DB01736	C17H36N2O2	300.48	300.278	2	experimental
DB01737	C20H24N4O5S	432.493	432.147	6	experimental
DB01738	C2H8NO4P	141.063	141.019	4	experimental
DB01739	C6H13NO2	131.173	131.095	3	experimental
DB01742	C8H15NO	141.211	141.115	1	experimental
DB01744	C10H16O	152.233	152.12	1	approved
DB01745	C27H30N4O5S	522.616	522.194	6	experimental
DB01746	C6H13NO2	131.173	131.095	3	experimental
DB01748	C14H14N2O3S	290.338	290.073	3	experimental
DB01749	C4H10O2	90.121	90.0681	2	experimental
DB01750	C12H10O2	186.207	186.068	2	experimental
DB01751	C14H8I4O4	747.829	747.66	3	experimental
DB01752	C14H20N6O5S	384.411	384.122	10	experimental
DB01753	C21H29N7O18P3	760.412	760.078	18	experimental
DB01754	C10H9NO3	191.183	191.058	3	experimental
DB01755	C16H26N8O6S	458.493	458.17	12	experimental
DB01756	C4H9O8P	216.083	216.004	7	experimental
DB01758	C9H10INO3	307.085	306.971	4	experimental
DB01759	C6H6O4	142.109	142.027	4	experimental
DB01760	C8H12N2O	152.194	152.095	3	experimental
DB01761	C28H29F3N6	506.565	506.241	5	experimental
DB01762	C4H6O3	102.089	102.032	3	experimental
DB01763	C21H28N7O16P3S	759.471	759.053	17	experimental
DB01764	C34H50N4O9S	690.85	690.33	9	approved
DB01765	C17H12N2O3	292.289	292.085	3	experimental
DB01766	C13H13NO2	215.248	215.095	3	experimental
DB01767	C16H14N6	290.323	290.128	4	experimental
DB01768	C21H25NO11	467.423	467.143	10	experimental
DB01771	C20H20ClN3O2	369.845	369.124	3	experimental
DB01772	C22H20FN3O4	409.41	409.144	5	experimental
DB01774	C16H25N5O15P2	589.342	589.082	16	experimental
DB01775	C3H6O3	90.0779	90.0317	3	experimental
DB01776	C7H8O	108.138	108.058	1	experimental
DB01778	C7H9N5O2	195.179	195.076	5	experimental
DB01779	C3H9O6P	172.074	172.014	5	experimental
DB01780	C36H56O12	680.823	680.377	10	experimental
DB01782	C14H8N2O	220.226	220.064	2	experimental
DB01783	C9H17NO5	219.235	219.111	5	approved; nutraceutical; vet_approved
DB01784	C6H6FNO2S	175.181	175.01	2	experimental
DB01785	C5H12O7P2	246.092	246.006	5	experimental
DB01786	C3H7NO2	89.0932	89.0477	3	experimental
DB01788	C6H7N3	121.14	121.064	3	experimental
DB01789	C7H13NO3	159.183	159.09	4	experimental
DB01791	C18H18Cl2N2O3	381.253	380.069	4	experimental
DB01792	C19H25N7O15P2	653.387	653.088	16	experimental
DB01793	C17H10Cl2N2O4	377.178	376.002	5	experimental
DB01796	C7H5NO4	167.119	167.022	5	experimental
DB01797	C6H10N3O5	204.161	204.062	6	experimental
DB01798	C2H8O7P2	206.028	205.975	5	experimental
DB01799	C5H14O8P2	264.107	264.016	6	experimental
DB01800	C6H5NO7S	235.171	234.979	6	experimental
DB01802	C9H17N	139.238	139.136	1	experimental
DB01803	C5H14NS	120.236	120.085	0	experimental
DB01804	C4H7NO2	101.104	101.048	2	experimental
DB01805	C6H14NO6P	227.152	227.056	5	experimental
DB01807	C20H21ClN4O	368.87	368.14	2	experimental
DB01809	C16H19N5	281.356	281.164	4	experimental
DB01810	C23H24N2O5	408.447	408.169	4	experimental
DB01811	C8H7NO2	149.147	149.048	2	experimental
DB01812	C10H15N5O10P2	427.201	427.029	12	experimental
DB01813	C13H20N2O9P	379.28	379.091	9	experimental
DB01815	C9H16N2O6	248.233	248.101	8	experimental
DB01816	C8H15NO4	189.209	189.1	5	experimental
DB01817	C8H16N2O6	236.222	236.101	8	experimental
DB01818	C6H12O9S	260.219	260.02	8	experimental
DB01819	C3H5O6P	168.042	167.982	5	experimental
DB01820	C29H31N3O7	533.572	533.216	7	experimental
DB01821	C10H22N8O4	318.333	318.176	9	experimental
DB01822	C4H8O2S2	152.235	151.997	2	experimental
DB01823	C8H12N2O7	248.19	248.064	7	experimental
DB01824	C36H43N3O7	629.742	629.31	8	experimental
DB01825	C9H9N3O	175.187	175.075	4	experimental
DB01826	C5H9N	83.1317	83.0735	0	experimental
DB01827	C8H5F4NO2	223.124	223.026	2	experimental
DB01828	CH5N	31.0571	31.0422	1	experimental
DB01830	C30H41N3O10P2	665.608	665.227	10	experimental
DB01831	C21H24N7O8P	533.431	533.142	11	experimental
DB01832	C5H9O5P	180.096	180.019	5	experimental
DB01833	C5H12N4O3	176.174	176.091	7	experimental
DB01834	C24H27N3O7S	501.552	501.157	8	experimental
DB01835	C8H16FN3O2	205.233	205.123	5	experimental
DB01836	C25H27ClN4O3S	499.025	498.149	5	experimental
DB01837	C5H9NO4	147.129	147.053	4	experimental
DB01838	C16H10Br2O4	426.056	423.895	4	experimental
DB01839	C3H8O2	76.0944	76.0524	2	approved; investigational
DB01840	C7H15O7P	242.164	242.056	7	experimental
DB01841	C6H12O4	148.157	148.074	4	experimental
DB01842	C10H16N5O13P3	507.181	506.996	14	experimental
DB01843	C8H13N3O7	263.205	263.075	8	experimental
DB01844	C3H7NO	73.0938	73.0528	1	experimental
DB01847	C6H12N2O3	160.171	160.085	3	experimental
DB01849	C4H6N2O2	114.103	114.043	2	experimental
DB01850	C20H29NO3	331.449	331.215	4	experimental
DB01851	C16H36N	242.464	242.285	0	experimental
DB01852	C15H10O6	286.236	286.048	6	experimental
DB01854	C6H5BrN2O	201.021	199.959	2	experimental
DB01856	C7H12O4	160.168	160.074	4	experimental
DB01857	C4H8NO7P	213.083	213.004	7	experimental
DB01858	C23H29FN4O4	444.499	444.217	4	experimental
DB01859	C14H26N3O17P3	601.287	601.048	16	experimental
DB01860	C10H16N5O12P3	491.182	491.001	13	experimental
DB01861	C15H24N2O17P2	566.302	566.055	14	experimental
DB01862	C9H18O5S	238.301	238.087	5	experimental
DB01864	C10H16N5O13P3S	539.246	538.968	13	experimental
DB01865	C19H20N4O	320.388	320.164	3	experimental
DB01866	C8H8O5S	216.211	216.009	5	experimental
DB01870	C6H12O4S2	212.287	212.018	4	experimental
DB01871	C27H28N2O5	460.522	460.2	4	experimental
DB01872	C8H15NO9S	301.271	301.047	8	experimental
DB01873	C27H41NO5S	491.683	491.271	5	investigational
DB01874	C8H13NO	139.195	139.1	2	experimental
DB01875	C4H3N5O2	153.099	153.029	4	experimental
DB01876	C17H14N8O	346.346	346.129	7	experimental
DB01877	C13H19N3O6S	345.371	345.099	7	experimental
DB01878	C13H10O	182.218	182.073	1	experimental
DB01879	C32H26N2O10S2	662.686	662.103	9	experimental
DB01880	C9H8O4	180.157	180.042	4	experimental; investigational
DB01881	C6H14O3	134.174	134.094	3	experimental
DB01882	C10H16N2O2S	228.311	228.093	4	experimental
DB01883	C21H30N4O5S2	482.617	482.166	5	experimental
DB01884	C9H18N2O	170.252	170.142	2	experimental
DB01885	C6H10O6	178.14	178.048	5	experimental
DB01889	C19H30O	274.441	274.23	1	experimental
DB01891	C25H33N3O5	455.547	455.242	4	experimental
DB01893	C17H21N5O10P2	517.324	517.076	12	experimental
DB01895	C14H19N6O10P	462.309	462.09	13	experimental
DB01897	C24H16N7O2S	466.495	466.109	5	experimental
DB01898	C6H11NO4	161.156	161.069	5	experimental
DB01902	C6H9NO2	127.141	127.063	2	experimental
DB01903	C9H12BrN2O8P	387.078	385.951	7	experimental
DB01906	C11H8N6O3	272.22	272.066	8	experimental
DB01908	C32H36N3O9P	637.617	637.219	9	experimental
DB01910	C15H23N7O5	381.387	381.176	11	experimental
DB01914	C6H12O6	180.156	180.063	6	approved; investigational; vet_approved
DB01915	C3H7NO3S	137.158	137.015	4	experimental
DB01917	C4H12N2	88.1515	88.1	2	experimental
DB01919	C5H10O	86.1323	86.0732	1	experimental
DB01920	C12H15NO8	301.249	301.08	8	experimental
DB01921	C5H10N2O4	162.144	162.064	6	experimental
DB01922	C18H32N2O15	516.451	516.18	17	experimental
DB01923	C5H11O8P	230.11	230.019	7	experimental
DB01924	C7H7NO2	137.136	137.048	2	experimental
DB01925	C12H9ClO2	220.652	220.029	2	experimental
DB01927	C10H12O2	164.201	164.084	2	experimental
DB01930	C6H11O4	147.149	147.066	4	experimental
DB01931	C10H5Cl2NO3	258.058	256.965	4	experimental
DB01932	C5H7N	81.1158	81.0578	0	experimental
DB01933	C28H26N4O4	482.53	482.195	5	experimental; investigational
DB01935	C12H15NO3S	253.317	253.077	3	experimental
DB01936	C5H10O5	150.13	150.053	5	experimental; investigational
DB01937	C10H14N5O8P	363.221	363.058	10	experimental
DB01938	C16H16N4O	280.324	280.132	3	experimental
DB01939	C8H9N4	161.184	161.083	2	experimental
DB01940	C27H26N2O6	474.505	474.179	6	experimental
DB01941	C24H29NO2	363.493	363.22	3	experimental
DB01942	CH2O2	46.0254	46.0055	2	experimental; investigational
DB01944	C18H16N2O2	292.332	292.121	4	experimental
DB01945	C9H12N3O9P	337.18	337.031	9	experimental
DB01946	C24H22N4O2	398.457	398.174	3	experimental
DB01947	C7H7O5P	202.101	202.003	4	experimental
DB01948	C26H22Cl2F2N2O	487.368	486.108	2	experimental
DB01949	C7H16N2O	144.215	144.126	2	experimental
DB01950	C12H12N4O4S	308.313	308.058	5	experimental
DB01951	C20H28N2O4	360.447	360.205	4	experimental
DB01952	C7H5N5	159.148	159.054	3	experimental
DB01953	C15H14N2	222.285	222.116	1	experimental
DB01954	C16H21NO3	275.348	275.152	3	investigational
DB01955	C4H10O2	90.121	90.0681	2	experimental
DB01956	C2H7NO3S	125.147	125.015	4	approved; nutraceutical
DB01957	C6H5ClO	128.556	128.003	1	experimental
DB01958	C18H20N4S	324.443	324.141	4	experimental
DB01959	C14H15N3O4	289.287	289.106	4	experimental
DB01960	C11H19N5O11P2	459.243	459.056	14	experimental
DB01961	C9H14N3O8P	323.197	323.052	9	experimental
DB01962	C9H12NO6P	261.168	261.04	6	experimental
DB01964	C13H14N2O6S3	390.455	390.001	6	experimental
DB01965	C9H16N3O13P3	467.157	466.99	11	experimental
DB01967	C21H29N3O3S	403.538	403.193	4	experimental
DB01968	C2H5NS	75.133	75.0143	1	experimental
DB01971	C6H6N2O2	138.124	138.043	3	experimental
DB01972	C10H14N5O8P	363.221	363.058	10	experimental
DB01973	C10H13NO5S	259.279	259.051	5	experimental
DB01974	C8H13N3O5S	263.271	263.058	8	experimental
DB01975	C16H25N5O13P2	557.343	557.092	15	experimental
DB01976	C14H11N	193.244	193.089	1	experimental
DB01977	C18H15N3O	289.331	289.122	3	experimental
DB01979	C7H14O6	194.183	194.079	6	experimental
DB01980	C9H11IN2O2	306.1	305.987	3	experimental
DB01981	C6H10O8S	242.204	242.01	7	experimental
DB01982	C6H10O7	194.139	194.043	7	experimental
DB01985	C8H16N4O3	216.238	216.122	6	experimental
DB01986	C7H8FN	125.144	125.064	1	experimental
DB01987	C12H18N4O7P2S	424.306	424.037	8	approved; experimental
DB01988	C30H27N5	457.569	457.227	5	experimental
DB01990	C27H46O4S	466.717	466.312	3	experimental
DB01993	C11H17N2O7P	320.236	320.077	8	experimental
DB01994	C11H11N5O	229.238	229.096	5	experimental
DB01995	C10H16N3O8P	337.223	337.068	9	experimental
DB01996	C6H7N	93.1265	93.0578	1	experimental
DB01997	C7H4BrN3O2	242.03	240.949	3	experimental
DB01998	C20H38O11	454.509	454.241	11	experimental
DB02001	C18H19N5OS	353.441	353.131	6	experimental
DB02002	C3H6N2O	86.0925	86.048	2	experimental
DB02004	C19H18Cl2N4O2	405.278	404.081	6	experimental
DB02005	C5H6O3	114.099	114.032	3	experimental
DB02007	C6H13O9P	260.136	260.03	8	experimental
DB02008	C25H26FN5O3	463.504	463.202	4	experimental
DB02009	C39H48N4O5	652.836	652.362	6	experimental
DB02010	C28H26N4O3	466.531	466.2	4	experimental
DB02011	C7H15N2O6P	254.178	254.067	7	experimental
DB02014	C21H16FNO7	413.353	413.091	6	experimental
DB02015	C19H21N7O6	443.413	443.155	11	experimental
DB02016	C23H27BrFNO2	448.368	447.121	3	experimental
DB02017	C14H22N2O9	362.332	362.133	10	experimental
DB02018	C10H10N2O3	206.198	206.069	5	experimental
DB02019	C16H12O5	284.264	284.068	5	experimental
DB02020	C14H9NO4	255.226	255.053	4	experimental
DB02021	C12H10FN3O4	279.224	279.066	4	experimental
DB02022	C6H9N3O	139.155	139.075	4	experimental
DB02023	C10H14N5O8P	363.221	363.058	11	experimental
DB02024	C9H10O2	150.174	150.068	2	experimental
DB02025	C14H25N3O6S	363.43	363.146	7	experimental
DB02026	C20H22N6O6	442.425	442.16	10	experimental
DB02027	C8H21N7O2	247.298	247.176	8	experimental
DB02029	C13H17IN2O	344.191	344.039	1	experimental
DB02030	C14H19N2O7P	358.284	358.093	7	experimental
DB02031	C19H23N7O6	445.429	445.171	11	experimental
DB02032	C9H15NO3S	217.285	217.077	3	experimental
DB02033	C27H29NO5S	479.588	479.177	4	experimental
DB02034	C8H15NO3	173.21	173.105	4	experimental
DB02035	C16H33FO2S	308.495	308.219	2	experimental
DB02036	C10H10N2O3S	238.263	238.041	3	experimental
DB02037	C4H6N4O2	142.116	142.049	6	experimental
DB02038	C11H16N3O7P	333.234	333.073	8	experimental
DB02039	C5H9NO3S	163.195	163.03	4	experimental
DB02041	C8H7N3O2	177.16	177.054	3	experimental
DB02042	C11H24O6	252.305	252.157	6	experimental
DB02044	C10H15N3	177.246	177.127	3	experimental
DB02045	C5H13N	87.1634	87.1048	1	experimental
DB02046	C21H26N3O6P	447.421	447.156	5	experimental
DB02047	C15H14O2	226.27	226.099	2	experimental
DB02048	C3H6N5	112.113	112.062	3	experimental
DB02049	C19H20ClNO6S	425.883	425.07	5	experimental
DB02053	C5H11O8P	230.11	230.019	7	experimental
DB02054	C7H7NO2	137.136	137.048	3	experimental
DB02055	C10H15NO2S	213.297	213.082	2	experimental
DB02056	C20H32O5	352.465	352.225	5	investigational
DB02057	C7H10N2O4	186.165	186.064	5	experimental
DB02058	C20H21N3O2	335.4	335.163	3	experimental
DB02059	C15H23N5O14P2	559.316	559.072	15	experimental
DB02060	C6H10O	98.143	98.0732	1	experimental
DB02061	C12H22O11	342.297	342.116	11	experimental
DB02062	C21H27N2O5P	418.423	418.166	6	experimental
DB02065	C12H22O10	326.297	326.121	10	experimental
DB02066	C11H15N5O4	281.268	281.112	8	experimental
DB02068	C5H12NO2	118.154	118.087	2	experimental
DB02069	C14H13FN2O3S	308.328	308.063	3	experimental
DB02070	C10H12N2O3	208.214	208.085	5	experimental
DB02071	C21H21N3O5S	427.474	427.12	6	experimental
DB02072	C10H9NO5S2	287.312	286.992	5	experimental
DB02074	C4H6O2	86.0892	86.0368	2	experimental
DB02075	C11H15N4O7P	346.233	346.068	9	experimental
DB02076	C6H13O10P	276.135	276.025	9	experimental
DB02077	C11H22N8O4	330.344	330.176	9	experimental
DB02078	C8H18O4	178.226	178.121	4	experimental
DB02079	C2H5NO3	91.066	91.0269	4	experimental
DB02080	C21H36O4	352.508	352.261	4	experimental
DB02081	C23H28N4O	376.495	376.226	5	experimental
DB02082	C10H17N6O13P3	522.196	522.007	15	experimental
DB02083	C4H9NO2	103.12	103.063	3	experimental
DB02085	C4H7NO2	101.104	101.048	3	experimental
DB02087	C6H5F2NO2S	193.171	193.001	2	experimental
DB02088	C5H14NO3P	167.143	167.071	4	experimental
DB02089	C24H24Cl2N4O4	503.378	502.117	4	experimental
DB02090	C20H37N3O6	415.524	415.268	6	experimental
DB02091	C9H10N4S	206.267	206.063	4	experimental
DB02093	C5H12NO9P	261.124	261.025	8	experimental
DB02095	C8H5NO2	147.131	147.032	2	experimental
DB02096	C14H17N3O2	259.304	259.132	3	experimental
DB02097	C9H13N3O5	243.217	243.086	7	experimental
DB02098	C10H15N5O10P2	427.201	427.029	12	experimental
DB02099	C14H26N	208.363	208.207	0	experimental
DB02100	C7H14O6	194.183	194.079	6	experimental
DB02101	C12H10FN3O4	279.224	279.066	4	experimental
DB02102	C33H36N4O3	536.664	536.279	5	experimental
DB02103	C10H12ClN5O2	269.688	269.068	6	experimental
DB02104	C19H24N6O3	384.432	384.191	9	experimental
DB02105	C6H4N2O6	200.106	200.007	6	experimental
DB02106	C23H23Br2NO5	553.24	550.994	5	experimental
DB02107	C6H15N	101.19	101.12	1	experimental
DB02109	C3H5NO4	119.076	119.022	4	experimental
DB02111	C4H3NO4	129.071	129.006	4	experimental
DB02112	C31H31N5O	489.611	489.253	5	experimental
DB02113	C6H6N4	134.139	134.059	3	experimental
DB02114	C9H13N	135.206	135.105	1	experimental
DB02115	C21H20O9	416.382	416.111	9	experimental
DB02116	C15H18N6O	298.343	298.154	6	experimental
DB02118	C19H20N2O4S	372.438	372.114	4	experimental
DB02119	C7H9N5O2	195.179	195.076	6	experimental
DB02120	C7H13NO4	175.182	175.084	5	experimental
DB02121	C4H9NO	87.1204	87.0684	1	experimental
DB02123	C26H43NO5	449.623	449.314	5	experimental
DB02124	C7H9NO3	155.151	155.058	4	experimental
DB02126	C10H8O4	192.168	192.042	4	experimental
DB02127	C7H17O3P	180.182	180.092	1	experimental
DB02128	C27H29N3O5	475.536	475.211	5	experimental
DB02129	C5H6N2O4	158.112	158.033	4	experimental
DB02130	C8H7O4	167.139	167.034	4	experimental
DB02131	C9H19NO	157.253	157.147	1	experimental
DB02132	C17H11BrClFN2O4	441.636	439.957	4	experimental
DB02134	C5H4N4O2	152.111	152.033	3	experimental
DB02135	C14H23N4O11P	454.326	454.11	10	experimental
DB02138	C12H19O3P	242.251	242.107	1	experimental
DB02139	C22H23BrFN3O	444.34	443.101	3	experimental
DB02140	C22H26N4O4	410.466	410.195	5	experimental
DB02141	C12H18N4S2	282.428	282.097	4	experimental
DB02142	C8H13N2O5P	248.173	248.056	6	experimental
DB02143	C4H11N3O	117.15	117.09	4	experimental
DB02145	C4H10O	74.1216	74.0732	1	experimental
DB02148	C11H15NO2	193.242	193.11	3	experimental
DB02151	C4H12NO3PS	185.182	185.028	4	experimental
DB02152	C27H21N3O5	467.473	467.148	4	experimental
DB02153	C3H7NO4S	153.157	153.01	5	experimental
DB02154	C20H18O8	386.352	386.1	8	experimental
DB02155	C32H36N2O7	560.637	560.252	7	experimental
DB02156	C3H4O6S	168.125	167.973	6	experimental
DB02158	C12H19N5O2S	297.377	297.126	6	experimental
DB02159	C3H8O2	76.0944	76.0524	2	experimental
DB02160	C7H13NO3S	191.248	191.062	4	experimental
DB02162	C12H18N6O6S	374.373	374.101	10	experimental
DB02163	C8H11N	121.18	121.089	1	experimental
DB02164	C17H21N4O12PS	536.407	536.061	13	experimental
DB02166	C27H34N4	414.586	414.278	2	experimental
DB02167	C5H11NO2	117.146	117.079	3	experimental
DB02168	C5H3BrN4	199.008	197.954	3	experimental
DB02170	C13H7NO6	273.198	273.027	5	experimental
DB02172	C6H13NO4	163.172	163.084	5	experimental
DB02174	C5H10N2O3	146.144	146.069	4	experimental
DB02175	C3H4O4	104.061	104.011	4	experimental
DB02177	C25H26N4O4S	478.563	478.167	6	experimental
DB02178	C8H8O	120.148	120.058	1	experimental
DB02179	C14H10F3NO2	281.23	281.066	3	experimental
DB02181	C10H16N5O13P3	507.181	506.996	13	experimental
DB02184	C4H10O2S2	154.251	154.012	2	experimental
DB02185	C9H9NO5	211.172	211.048	5	experimental
DB02186	C8H15NO9S	301.271	301.047	8	experimental
DB02187	C18H20O2	268.35	268.146	2	experimental
DB02189	C10H16N5O11P3	475.182	475.006	12	experimental
DB02190	C6H6O7	190.108	190.011	7	experimental
DB02191	C15H16N2O	240.3	240.126	2	experimental
DB02192	C8H10O	122.164	122.073	1	experimental
DB02194	C26H21N3O4	439.463	439.153	6	experimental
DB02195	C18H12FN3O	305.306	305.096	3	experimental
DB02196	C17H27N3O17P2	607.354	607.082	14	experimental
DB02197	C17H14N6O2S	366.397	366.09	6	experimental
DB02198	C2H3BrO2	138.948	137.932	2	experimental
DB02201	C3H2O4	102.046	101.995	4	experimental
DB02202	C4H10O2	90.121	90.0681	2	experimental
DB02203	C4H7NO	85.1045	85.0528	2	experimental
DB02205	C19H22O4	314.376	314.152	3	experimental
DB02207	C7H5N3O2	163.133	163.038	3	experimental
DB02209	C8H12NO6P	249.158	249.04	6	experimental
DB02210	C6H14O2	118.174	118.099	2	experimental
DB02211	C13H15N	185.265	185.12	1	experimental
DB02213	C12H15NO8	301.249	301.08	8	experimental
DB02214	C11H14N4O8	330.251	330.081	8	experimental
DB02215	C11H15NO4	225.241	225.1	3	experimental
DB02216	C4H9NO2S	135.185	135.035	3	experimental
DB02217	C17H19N2O8P	410.315	410.088	8	experimental
DB02218	C13H23NO8	321.324	321.142	9	experimental
DB02219	C9H19NO3S	221.317	221.109	4	experimental
DB02220	C14H17N3O5S3	403.497	403.033	6	experimental
DB02221	C14H11F3N2O3S	344.309	344.044	3	experimental
DB02222	C9H13N6O4P	300.211	300.074	9	experimental
DB02224	C15H12O7	304.252	304.058	7	experimental
DB02226	C42H45N8	661.86	661.377	6	experimental
DB02227	C6H10O5	162.141	162.053	5	experimental
DB02228	C6H11FO5	182.147	182.059	5	experimental
DB02229	C15H25N7O7S2	479.532	479.126	13	experimental
DB02230	C11H15N5O4	281.268	281.112	7	experimental
DB02232	C6H6O2	110.111	110.037	2	experimental
DB02233	C6H13NO3	147.172	147.09	4	experimental
DB02234	C3H8N2S	104.174	104.041	2	experimental
DB02235	C5H11NO3S	165.211	165.046	4	experimental
DB02236	C7H15N2O8P	286.176	286.057	8	experimental
DB02237	C24H42O21	666.579	666.222	21	experimental
DB02238	C5H8O3S	148.18	148.019	3	experimental
DB02239	C5H8O3	116.115	116.047	3	experimental
DB02240	C23H28Cl3N3O	468.85	467.13	4	experimental
DB02241	C26H21N3O5	455.462	455.148	7	experimental
DB02242	C9H16O2	156.222	156.115	2	experimental
DB02245	C6H6N4O	150.138	150.054	4	experimental
DB02247	C14H16N2O5S2	356.417	356.05	6	experimental
DB02248	C6H11NO5S	209.22	209.036	6	experimental
DB02249	C4H10O2	90.121	90.0681	2	experimental
DB02251	C11H10O5	222.194	222.053	5	experimental
DB02252	C6H5I	204.008	203.944	0	experimental
DB02253	C30H42O2	434.653	434.318	2	experimental
DB02254	C12H13F3N4O4PS	397.29	397.035	6	experimental
DB02255	C20H28N4O4	388.461	388.211	4	experimental
DB02256	C9H12N2O5	228.202	228.075	5	experimental
DB02257	C4H9BrNO5P	261.996	260.94	4	experimental
DB02258	C26H27NO3	401.498	401.199	4	experimental
DB02259	C23H18Br2N2O7S2	658.336	655.892	6	experimental
DB02260	C10H16O5	216.231	216.1	5	experimental
DB02262	C5H4N2O4	156.096	156.017	4	investigational
DB02263	C3H7O6P	170.058	169.998	5	experimental
DB02264	C6H10O10S	274.203	273.999	9	experimental
DB02265	C5H14Si	102.25	102.086	0	experimental
DB02266	C14H10F3NO2	281.23	281.066	3	approved
DB02267	C10H18N4O6	290.273	290.123	10	experimental
DB02268	C9H10N2O3	194.187	194.069	4	experimental
DB02269	C34H36N5O2	546.682	546.287	4	experimental
DB02270	C5H14O6P2S	264.174	263.999	5	experimental
DB02272	C10H14N2O4	226.229	226.095	5	experimental
DB02273	C10H20O	156.265	156.151	1	experimental
DB02274	C9H17NO3	187.236	187.121	4	experimental
DB02275	C13H15N3O3	261.276	261.111	5	experimental
DB02276	C18H28N3O8P	445.404	445.161	7	experimental
DB02277	C15H19ClN4O	306.791	306.125	2	experimental
DB02278	C8H11N5O2	209.205	209.091	6	experimental
DB02279	C8H6O3	150.131	150.032	3	experimental
DB02280	C8H8O3	152.147	152.047	3	experimental
DB02281	C10H13N5O4	267.241	267.097	8	experimental
DB02282	C11H15N5O3S	297.334	297.09	7	experimental
DB02283	C8H11NO3S	201.243	201.046	4	experimental
DB02286	C11H13N3O2	219.24	219.101	4	experimental
DB02289	C3H5NO4	119.076	119.022	5	experimental
DB02290	C13H21N4O11P	440.3	440.094	10	experimental
DB02292	C14H15NO5S	309.338	309.067	4	investigational
DB02294	C6H10N4O4	202.168	202.07	7	experimental
DB02295	C25H34N8O4S	542.654	542.242	6	experimental
DB02296	C5H12O	88.1482	88.0888	1	experimental
DB02297	C4H4ClN3	129.548	129.009	3	experimental
DB02299	C6H16N5O	174.224	174.135	4	experimental
DB02300	C27H40O3	412.605	412.298	3	approved
DB02301	C20H21N7O6	455.424	455.155	12	experimental
DB02302	C8H18N4O2	202.254	202.143	6	experimental
DB02303	C4H5IN2O2	239.999	239.94	2	experimental
DB02304	C20H30O4	334.456	334.214	4	experimental
DB02305	C6H8O6	176.124	176.032	6	experimental
DB02307	C23H27N3O6	441.477	441.19	7	experimental
DB02309	C10H14N4O9P	365.214	365.049	8	experimental
DB02310	C17H19N2	251.346	251.155	1	experimental
DB02311	C3H8OS2	124.225	124.002	1	experimental
DB02312	C6H13O9P	260.136	260.03	8	experimental
DB02315	C10H12N5O7P	345.205	345.047	8	experimental
DB02316	C22H21Cl2NO5	450.312	449.08	5	experimental
DB02317	C6H13O9P	260.136	260.03	8	experimental
DB02319	C21H32N7O19P3	779.436	779.097	20	experimental
DB02320	C8H15NO6	221.208	221.09	6	experimental
DB02321	C9H17NO6S	267.299	267.078	7	experimental
DB02322	C12H15NO19S3	573.438	572.94	17	experimental
DB02323	C37H51N5O7	677.83	677.379	10	experimental
DB02324	C9H12IN2O8P	434.078	433.938	7	experimental
DB02325	C3H8O	60.095	60.0575	1	approved; investigational
DB02326	C7H13NO4	175.182	175.084	4	experimental
DB02327	C6H14O4	150.173	150.089	4	experimental
DB02329	C34H50O7	570.757	570.356	6	experimental
DB02331	C29H21Cl2NO4S	550.452	549.057	3	experimental
DB02333	C9H15N2O14P3	468.142	467.974	11	experimental
DB02334	C3H6O6S	170.141	169.989	6	experimental
DB02335	C3H6N2S	102.158	102.025	2	experimental
DB02336	C30H35N3O9P2	643.561	643.185	9	experimental
DB02337	C9H17NO4S	235.301	235.088	5	experimental
DB02338	C21H30N7O17P3	745.421	745.091	18	experimental
DB02339	C24H28BrNO2	442.389	441.13	2	experimental
DB02340	C5H9NO4	147.129	147.053	4	experimental
DB02341	C29H37F5N4O6	632.619	632.263	6	experimental
DB02342	C19H26O3	302.408	302.188	3	investigational
DB02343	C12H26O5	250.332	250.178	5	experimental
DB02346	C20H36O12	468.493	468.221	11	experimental
DB02347	C11H19N2O7P	322.252	322.093	8	experimental
DB02348	FO3P	97.9704	97.9569	3	experimental
DB02350	C15H22N2O5S2	374.476	374.097	5	experimental
DB02352	C12H12N2O	200.237	200.095	3	experimental
DB02353	C12H16NO16S2	494.383	493.991	15	experimental
DB02354	C25H25N7	423.513	423.217	5	experimental
DB02357	C13H24O11	356.323	356.132	11	experimental
DB02358	C17H19N7O7	433.375	433.135	11	experimental
DB02359	C18H23N5O2	341.408	341.185	6	experimental
DB02360	C22H17O4P	376.342	376.086	4	experimental
DB02361	C4H9NO2S2	167.25	167.007	3	experimental
DB02362	C7H7NO2	137.136	137.048	3	approved; experimental
DB02363	C10H16N5O13P3	507.181	506.996	14	experimental
DB02364	C7H16NO6P	241.179	241.072	4	experimental
DB02365	C12H8N2	180.205	180.069	2	experimental
DB02367	C16H25N3O7S2	435.516	435.113	7	experimental
DB02368	C8H15N3O4	217.222	217.106	4	experimental
DB02369	C9H18NO7P2	314.189	314.056	6	experimental
DB02370	C9H18N2O4	218.25	218.127	6	experimental
DB02371	C6H15NO6S	229.251	229.062	7	experimental
DB02372	C6H9N3	123.156	123.08	3	experimental
DB02374	C7H10N2O3	170.166	170.069	4	experimental
DB02375	C15H10O8	318.235	318.038	8	experimental
DB02376	C6H12N2O5	192.17	192.075	7	experimental
DB02377	C5H5N5O	151.126	151.049	5	experimental
DB02379	C6H12O6	180.156	180.063	6	experimental
DB02380	C10H12N4O4	252.23	252.086	7	experimental
DB02381	C5H12N4O3	176.174	176.091	7	investigational
DB02382	C11H14NO9P	335.204	335.041	8	experimental
DB02383	C16H14F3NO3S	357.347	357.065	3	withdrawn
DB02384	C9H6FO3	181.141	181.03	3	experimental
DB02385	C9H11N5O4	253.215	253.081	8	experimental
DB02386	C5H14NO3P	167.143	167.071	4	experimental
DB02388	C27H34Cl2N6	513.505	512.222	5	experimental
DB02390	C18H21BrN4O	389.29	388.09	2	experimental
DB02391	C10H16N6O3	268.272	268.128	7	experimental
DB02393	C6H14O10P2	308.117	308.006	9	experimental
DB02394	C7H12O5	176.167	176.068	5	experimental
DB02395	C15H18N2O4	290.314	290.127	5	experimental
DB02396	C3H9N	59.1103	59.0735	1	experimental
DB02397	C11H20N2O8	308.285	308.122	9	experimental
DB02398	C19H18N4O	318.372	318.148	4	experimental
DB02399	C6H14O5	166.172	166.084	5	experimental
DB02400	C18H16N2O6	356.329	356.101	6	experimental
DB02401	C3H2N2O4	130.059	130.001	5	experimental
DB02402	C15H14N4O2	282.297	282.112	5	experimental
DB02403	C6H6FN	111.117	111.048	1	experimental
DB02405	C12H23BrO2	279.214	278.088	2	experimental
DB02406	C5H10O2	102.132	102.068	2	experimental
DB02407	C12H17N5O	247.296	247.143	5	experimental
DB02408	C10H22N2O2	202.294	202.168	4	experimental
DB02409	C9H17N	139.238	139.136	1	experimental
DB02410	C14H21N4O8P2S	467.351	467.056	9	experimental
DB02411	C29H40N4O7S	588.715	588.262	7	experimental
DB02412	C5H10O	86.1323	86.0732	1	experimental
DB02413	C5H11NO3S	165.211	165.046	4	experimental
DB02414	C11H14N4O2	234.255	234.112	3	experimental
DB02415	C10H22O2S	206.345	206.134	2	experimental
DB02416	C10H14IN5O4	395.154	395.009	9	experimental
DB02417	C6H3Br3O	330.799	327.773	1	experimental
DB02418	C4H10O2	90.121	90.0681	2	experimental
DB02419	C9H15NO3	185.22	185.105	2	experimental
DB02420	C9H10N2O3	194.187	194.069	4	experimental
DB02421	C15H24N2O17P2	566.302	566.055	14	experimental
DB02422	C13H24O10S	372.389	372.109	10	experimental
DB02423	H3O6P2S	193.033	192.913	5	experimental
DB02424	C29H40N2O9	560.636	560.273	8	experimental; investigational
DB02427	C18H21N5O2	339.392	339.17	7	experimental
DB02428	C10H7NO2	173.168	173.048	3	experimental
DB02429	C14H13FN2O3S	308.328	308.063	3	experimental
DB02430	C12H23O14P	422.276	422.083	13	experimental
DB02431	C9H16N3O14P3	483.156	482.985	13	experimental
DB02432	C35H36FN3O9	661.673	661.244	8	experimental
DB02433	C9H23NO13P2	415.225	415.064	13	experimental
DB02434	C8H10O2S	170.229	170.04	2	experimental
DB02435	C7H16N	114.209	114.128	0	experimental
DB02437	C7H16N2O3	176.214	176.116	4	experimental
DB02438	C7H14O6	194.183	194.079	6	experimental
DB02441	C9H12N4O2	208.217	208.096	3	experimental
DB02445	C6H16NO8P	261.167	261.061	8	experimental
DB02446	C5H10N2O4	162.144	162.064	5	experimental
DB02447	C8H12N2O8	264.19	264.059	8	experimental
DB02448	C13H26O2	214.344	214.193	2	experimental
DB02449	C28H29N3O4S	503.613	503.188	5	experimental
DB02450	C19H18O6	342.343	342.11	6	experimental
DB02451	C15H30O6	306.395	306.204	6	experimental
DB02452	C10H17N2O14P3	482.168	481.989	11	experimental
DB02454	C9H12N5O6P	317.195	317.053	9	experimental
DB02455	C23H18N2O5S	434.464	434.094	5	experimental
DB02456	C9H14N3O8P	323.197	323.052	9	experimental
DB02457	C15H33O2P	276.395	276.222	1	experimental
DB02458	C16H19N5O10S	473.415	473.085	11	experimental
DB02459	C8H9N3O2	179.176	179.069	5	experimental
DB02461	C4H10NO5PS	215.165	215.002	6	experimental
DB02462	C14H17NO2S	263.355	263.098	3	experimental
DB02463	C15H14N3O	252.291	252.114	2	experimental
DB02464	C7H9N	107.153	107.073	1	experimental
DB02466	C24H26O3	362.461	362.188	3	experimental
DB02467	C5H11NO3S	165.21	165.046	3	experimental
DB02469	C6H13NO4	163.172	163.084	5	experimental
DB02470	C7H15O10P	290.162	290.04	9	experimental
DB02471	C6H10N4O4	202.168	202.07	7	experimental
DB02472	C10H14N4O5	270.242	270.096	9	experimental
DB02473	C24H24N4O	384.474	384.195	4	experimental
DB02474	C14H26N2O8	350.365	350.169	7	experimental
DB02475	C9H16N4O3	228.248	228.122	6	experimental
DB02479	C19H21N3O3S	371.453	371.13	3	experimental
DB02480	C5H13BrO8P2	343.003	341.927	6	experimental
DB02481	C8H9NO	135.163	135.068	1	experimental
DB02482	C4H10NO6P	199.099	199.025	6	experimental
DB02483	C23H27N7O14P2	687.447	687.109	14	experimental
DB02484	C12H21N3O13P2	477.255	477.055	12	experimental
DB02485	C20H31N4O16P	614.451	614.147	16	experimental
DB02486	C4H10O2S2	154.251	154.012	2	experimental
DB02488	C12H21N3O4	271.313	271.153	6	experimental
DB02489	C6H7N5O	165.153	165.065	4	experimental
DB02490	C4H11N3O2	133.149	133.085	5	experimental
DB02491	C25H30ClN5O	451.992	451.214	6	experimental
DB02493	C7H11N2O9P	298.144	298.02	10	experimental
DB02494	C9H10O3	166.174	166.063	3	experimental
DB02495	C15H17N5O2	299.328	299.138	5	experimental
DB02496	C5H11O7P	214.11	214.024	6	experimental
DB02497	C6H14NO8P	259.151	259.046	7	experimental
DB02498	C22H30N7O13P2	662.46	662.138	14	experimental
DB02499	C4H10N4O3	162.147	162.075	7	experimental
DB02500	C9H14N2O4	214.219	214.095	4	experimental
DB02501	C10H18N4O5	274.274	274.128	9	experimental
DB02502	C10H13N5O5	283.241	283.092	8	experimental
DB02504	C21H25N2O5P	416.407	416.15	5	experimental
DB02505	C37H44N4O3	592.77	592.341	4	experimental
DB02506	C20H33NO3	335.481	335.246	4	experimental
DB02507	C5H14O7P2	248.108	248.021	5	experimental
DB02508	C15H26O	222.366	222.198	1	experimental
DB02509	C15H21N7O7S	443.435	443.122	12	experimental
DB02510	C23H22N2O6	422.431	422.148	8	experimental
DB02511	C6H14O12P2	340.116	339.996	10	experimental
DB02512	C10H14O	150.221	150.104	1	approved
DB02513	C9H6O5P	225.115	224.995	4	experimental
DB02514	C3H9O6P	172.074	172.014	5	experimental
DB02515	C5H9NO4	147.129	147.053	5	experimental
DB02517	C5H9NO3	131.13	131.058	3	experimental
DB02518	C16H10N2O5S	342.326	342.031	6	experimental
DB02519	C5H11NS2	149.278	149.033	0	experimental
DB02520	C3H5O6P	168.042	167.982	6	experimental
DB02522	C16H17N8O19P3	718.27	717.982	20	experimental
DB02524	C6H12N2O5	192.17	192.075	7	experimental
DB02525	C10H12N5O6P	329.206	329.053	8	experimental
DB02527	C7H9N7O	207.193	207.087	6	experimental
DB02528	C13H23N3O5	301.339	301.164	6	experimental
DB02529	C4H9NO2	103.12	103.063	3	approved; investigational
DB02530	C4H8O2	88.1051	88.0524	2	experimental
DB02531	C8H9N5	175.191	175.086	5	experimental
DB02532	C9H10O	134.175	134.073	1	experimental
DB02534	C13H21N3O5S	331.388	331.12	6	experimental
DB02535	C3H6O3	90.0779	90.0317	3	experimental
DB02536	C14H13N5O	267.286	267.112	4	experimental
DB02538	C23H22N4O8	482.443	482.144	11	experimental
DB02540	C4H12NO	90.1442	90.0919	1	experimental
DB02541	C6H12FNO2	149.163	149.085	3	experimental
DB02542	C5H5NO2	111.099	111.032	2	experimental
DB02543	C23H27BrN2OS	459.442	458.103	3	experimental
DB02544	C32H36N2O3	496.64	496.273	3	experimental
DB02545	C14H20N2O3	264.32	264.147	3	approved; investigational
DB02546	C16H25N5O15P2	589.342	589.082	16	experimental
DB02547	C6H15O9P	262.152	262.045	8	experimental
DB02548	C12H18N2O12P2	444.225	444.033	9	experimental
DB02549	C20H21ClFN5O3	433.864	433.132	7	experimental
DB02550	C23H24N4O	372.463	372.195	4	experimental
DB02551	C10H20O7P2	314.209	314.068	5	experimental
DB02552	C15H24N2O19P2S	630.366	630.017	16	experimental
DB02554	C33H42Cl2N8O4	685.644	684.271	8	experimental
DB02555	C9H11NO2	165.189	165.079	3	experimental
DB02556	C23H34N3O10P	543.504	543.198	9	experimental
DB02557	C21H24N2O4S	400.491	400.146	4	experimental
DB02558	C17H33N5	307.477	307.274	5	experimental
DB02559	C6H12O6	180.156	180.063	6	experimental
DB02561	C9H13N5O3	239.231	239.102	8	experimental
DB02562	C16H25N3O3	307.388	307.19	4	experimental
DB02565	C12H13NO4	235.236	235.084	5	experimental
DB02566	C21H16Cl2N4OS	443.349	442.042	4	experimental
DB02567	C12H11N5O	241.249	241.096	5	investigational
DB02568	C10H14N2O10P2	384.173	384.012	8	experimental
DB02569	C9H9IO2S	308.136	307.937	2	experimental
DB02570	C6H11NO3	145.156	145.074	4	experimental
DB02571	C19H25N8O9P	540.424	540.148	13	experimental
DB02573	C3H10NO	76.1176	76.0762	1	experimental
DB02576	C15H26N4O7	374.389	374.18	8	experimental
DB02578	C3H4O2	72.0627	72.0211	2	experimental
DB02579	C12H26O6	266.331	266.173	6	experimental
DB02580	C30H37Cl2N7O6	662.564	661.218	9	experimental
DB02581	C14H23N3O6S	361.414	361.131	9	experimental
DB02582	C17H20N6O2	340.38	340.165	8	experimental
DB02583	C8H10N2O	150.178	150.079	3	experimental
DB02585	C14H12N2	208.258	208.1	2	experimental
DB02586	C22H34O7	410.501	410.23	6	experimental; investigational
DB02587	C18H18N2O9	406.344	406.101	10	experimental
DB02588	C6H12O4	148.157	148.074	4	experimental
DB02590	C9H10N2	146.189	146.084	1	experimental
DB02591	C8H15O8P	270.174	270.05	8	experimental
DB02592	C15H14O8	322.267	322.069	8	experimental
DB02593	C9H13N3O4	227.217	227.091	6	experimental; investigational
DB02594	C16H30N3O14S2	552.551	552.117	13	experimental
DB02595	C11H18N5O12P3	505.208	505.016	14	experimental
DB02596	C19H28N2O4S	380.502	380.177	4	experimental
DB02597	C13H14I2N2O5	532.07	531.899	5	experimental
DB02598	C12H16N4OS	264.347	264.104	4	experimental
DB02599	C14H24N2O4	284.351	284.174	5	experimental
DB02600	C8H9NO3	167.164	167.058	4	experimental
DB02601	C13H14N2O5S3	374.456	374.006	5	experimental
[truncated: 6,821 more rows]

## Sheet: 1545mols
id1	id2	title	score	name	id	weight	weight2	num	fzs	generic_name	q1	q2	q3	q4	q5
1	7506	dbank_007506	-10.7	5282330	DB12983	514.552	514.165	6	C32H18N8	Phthalocyanine	investigational	investigational
2	1640	dbank_001640	-10.5	3035817	DB02152	467.473	467.148	4	C27H21N3O5	K-252a	experimental	experimental
3	7134	dbank_007134	-10.5	46215462	DB12411	506.658	506.291	7	C30H34N8	R-428	investigational	investigational
4	6996	dbank_006996	-10.4	56934415	DB12225	659.838	659.314	7	C36H45N5O5S	Beclabuvir	investigational	investigational
5	4134	dbank_004134	-10	176167	DB06486	515.617	515.232	4	C32H29N5O2	Enzastaurin	investigational	investigational
6	6605	dbank_006605	-10	51039094	DB11652	480.532	480.202	8	C26H24N8O2	Tucatinib	investigational	investigational
7	8467	dbank_008467	-10	121301049	DB14894	559.47	559.125	7	C28H21F4NO7	Galicaftor	investigational	investigational
8	185	dbank_000185	-9.9	10531	DB00320	583.677	583.279	6	C33H37N5O5	Dihydroergotamine	approved; investigational	approved	investigational
9	3746	dbank_003746	-9.9	644241	DB04868	529.516	529.184	6	C28H22F3N7O	Nilotinib	approved; investigational	approved	investigational
10	7590	dbank_007590	-9.9	76958312	DB13109	488.552	488.228	9	C25H28N8O3	PKI-179	investigational	investigational
11	4172	dbank_004172	-9.8	9829523	DB06595	570.649	570.227	4	C35H30N4O4	Midostaurin	approved; investigational	approved	investigational
12	6784	dbank_006784	-9.8	10029385	DB11913	512.545	512.197	4	C28H25FN6O3	LY-2090314	investigational	investigational
13	495	dbank_000495	-9.7	8223	DB00696	581.662	581.264	6	C33H35N5O5	Ergotamine	approved	approved
14	5295	dbank_005295	-9.7	25113181	DB07969	388.386	388.151	5	C20H19F3N4O	3-[3-(4-methylpiperazin-1-yl)-7-(trifluoromethyl)quinoxalin-5-yl]phenol	experimental	experimental
15	7074	dbank_007074	-9.7	16063245	DB12323	530.515	530.179	7	C27H21F3N8O	Radotinib	investigational	investigational
16	7547	dbank_007547	-9.7	104903	DB13050	624.874	624.415	8	C38H52N6O2	Tirilazad	investigational	investigational
17	6698	dbank_006698	-9.6	25145656	DB11791	412.428	412.145	5	C23H17FN6O	Capmatinib	approved; investigational	approved	investigational
18	6705	dbank_006705	-9.6	90311989	DB11799	449.386	449.12	6	C21H18F3N3O5	Bictegravir	approved; investigational	approved	investigational
19	7144	dbank_007144	-9.6	25019940	DB12424	557.602	557.224	5	C31H29F2N5O3	MK-3207	investigational	investigational
20	7959	dbank_007959	-9.6	21158560	DB13648	666.909	666.392	4	C44H50N4O2	Alcuronium	experimental	experimental
21	598	dbank_000598	-9.5	110635	DB00820	389.404	389.138	4	C22H19N3O4	Tadalafil	approved; investigational	approved	investigational
22	3084	dbank_003084	-9.5	656932	DB04016	670.689	670.223	6	C40H35N2O6P	2-[3-({Methyl[1-(2-Naphthoyl)Piperidin-4-Yl]Amino}Carbonyl)-2-Naphthyl]-1-(1-Naphthyl)-2-Oxoethylphosphonic Acid	experimental	experimental
23	4351	dbank_004351	-9.5	16046126	DB06888	403.434	403.164	6	C22H21N5O3	(13R,15S)-13-METHYL-16-OXA-8,9,12,22,24-PENTAAZAHEXACYCLO[15.6.2.16,9.1,12,15.0,2,7.0,21,25]HEPTACOSA-1(24),2,4,6,17(25),18,20-HEPTAENE-23,26-DIONE	experimental	experimental
24	6610	dbank_006610	-9.5	17755052	DB11663	513.636	513.162	8	C23H27N7O3S2	Pictilisib	investigational	investigational
25	6747	dbank_006747	-9.5	46861623	DB11863	545.54	545.134	6	C25H22F3N5O4S	Alvelestat	investigational	investigational
26	6979	dbank_006979	-9.5	11494412	DB12200	369.424	369.148	2	C23H19N3O2	Tivantinib	investigational	investigational
27	7337	dbank_007337	-9.5	10026128	DB12719	438.466	438.175	2	C25H24F2N2O3	Turofexorate isopropyl	investigational	investigational
28	8704	dbank_008704	-9.5	118323590	DB15401	580.418	579.103	7	C26H23BrFN7O3	Danicopan	investigational	investigational
29	934	dbank_000934	-9.4	31101	DB01200	654.595	653.221	6	C32H40BrN5O5	Bromocriptine	approved; investigational	approved	investigational
30	1056	dbank_001056	-9.4	68723	DB01419	588.543	588.196	5	C30H26F6N4O2	Antrafenine	approved	approved
31	2484	dbank_002484	-9.4	448408	DB03231	499.544	499.143	9	C25H21N7O3S	3-(5-Amino-7-oxo-3,7-dihydro-2H-[1,2,3]triazolo[4,5-d]pyrimidin-2-yl)-N-(2-{[2-(hydroxymethyl)phenyl]sulfanyl}benzyl)benzamide	experimental	experimental
32	2548	dbank_002548	-9.4	448662	DB03311	741.448	738.875	7	C26H19Br2N3O7S3	3-(3,5-Dibromo-4-Hydroxy-Benzoyl)-2-Ethyl-Benzofuran-6-Sulfonic Acid [4-(Thiazol-2-Ylsulfamoyl)-Phenyl]-Amide	experimental	experimental
33	3330	dbank_003330	-9.4	5287508	DB04330	608.449	607.037	8	C29H19Cl2N3O6S	Bilh 434	experimental	experimental
34	4462	dbank_004462	-9.4	22479942	DB07020	370.364	370.118	4	C20H14N6O2	N-{3-[5-(1H-1,2,4-triazol-3-yl)-1H-indazol-3-yl]phenyl}furan-2-carboxamide	experimental	experimental
35	5435	dbank_005435	-9.4	5288710	DB08124	393.416	393.078	5	C20H15N3O4S	3-{[(2,2-dioxido-1,3-dihydro-2-benzothien-5-yl)amino]methylene}-5-(1,3-oxazol-5-yl)-1,3-dihydro-2H-indol-2-one	experimental	experimental
36	5709	dbank_005709	-9.4	9998128	DB08450	352.392	352.144	5	C21H16N6	N-1H-indazol-5-yl-2-(6-methylpyridin-2-yl)quinazolin-4-amine	experimental	experimental
37	8651	dbank_008651	-9.4	86582336	DB15291	572.613	572.224	4	C32H30F2N4O4	BMS-986142	investigational	investigational
38	645	dbank_000645	-9.3	151171	DB00872	498.574	498.206	3	C32H26N4O2	Conivaptan	approved; investigational	approved	investigational
39	1479	dbank_001479	-9.3	447725	DB01948	487.368	486.108	2	C26H22Cl2F2N2O	1-(2,6-Dichlorophenyl)-5-(2,4-Difluorophenyl)-7-Piperidin-4-Yl-3,4-Dihydroquinolin-2(1h)-One	experimental	experimental
40	1901	dbank_001901	-9.3	170119	DB02483	687.447	687.109	14	C23H27N7O14P2	Etheno-NAD	experimental	experimental
41	4191	dbank_004191	-9.3	11556427	DB06630	637.518	637.167	2	C30H25F10NO3	Anacetrapib	investigational	investigational
42	5907	dbank_005907	-9.3	447446	DB08683	393.394	393.111	3	C24H15N3O3	REL-(9R,12S)-9,10,11,12-TETRAHYDRO-9,12-EPOXY-1H-DIINDOLO[1,2,3-FG:3',2',1'-KL]PYRROLO[3,4-I][1,6]BENZODIAZOCINE-1,3(2H)-DIONE	experimental	experimental
43	6084	dbank_006084	-9.3	11707110	DB08911	615.395	615.078	5	C26H23FIN5O4	Trametinib	approved	approved
44	7524	dbank_007524	-9.3	5281051	DB13014	504.443	504.085	8	C30H16O8	Hypericin	investigational	investigational
45	8455	dbank_008455	-9.3	58438464	DB14870	512.68	512.236	5	C29H32N6OS	PF-5190457	investigational	investigational
46	8546	dbank_008546	-9.3	91758792	DB15085	487.391	487.099	6	C23H16F3N3O6	Fulacimstat	investigational	investigational
47	549	dbank_000549	-9.2	60838	DB00762	586.678	586.279	6	C33H38N4O6	Irinotecan	approved; investigational	approved	investigational
48	3790	dbank_003790	-9.2	159324	DB04960	489.396	488.117	3	C27H22Cl2N4O	Tipifarnib	investigational	investigational
49	3972	dbank_003972	-9.2	11656518	DB05984	518.423	518.129	4	C24H16F6N6O	RAF-265	investigational	investigational
50	4548	dbank_004548	-9.2	10072851	DB07117	458.469	458.17	7	C24H22N6O4	5-(4-PHENOXYPHENYL)-5-(4-PYRIMIDIN-2-YLPIPERAZIN-1-YL)PYRIMIDINE-2,4,6(2H,3H)-TRIONE	experimental	experimental
51	4681	dbank_004681	-9.2	9978312	DB07265	400.384	400.106	5	C23H16N2O5	3-(9-HYDROXY-1,3-DIOXO-4-PHENYL-2,3-DIHYDROPYRROLO[3,4-C]CARBAZOL-6(1H)-YL)PROPANOIC ACID	experimental	experimental
52	6802	dbank_006802	-9.2	71481097	DB11942	443.313	443.093	6	C17H11F6N7O	Selinexor	approved; investigational	approved	investigational
53	6832	dbank_006832	-9.2	25141092	DB11986	560.65	560.271	6	C31H34F2N6O2	Entrectinib	approved; investigational	approved	investigational
54	6983	dbank_006983	-9.2	71492799	DB12207	442.325	442.098	5	C18H12F6N6O	Verdinexor	investigational	investigational
55	7110	dbank_007110	-9.2	44603533	DB12381	552.531	552.172	4	C30H22F2N6O3	Merestinib	investigational	investigational
56	7388	dbank_007388	-9.2	6450806	DB12799	584.72	584.279	5	C37H36N4O3	Laniquidar	investigational	investigational
57	7447	dbank_007447	-9.2	73774610	DB12895	648.64	648.181	12	C28H30F2N6O8S	TD-139	investigational	investigational
58	7519	dbank_007519	-9.2	25066467	DB13005	553.587	553.224	7	C30H28FN7O3	Rebastinib	investigational	investigational
59	8416	dbank_008416	-9.2	89670174	DB14773	478.431	478.125	4	C25H17F3N4O3	Lifirafenib	investigational	investigational
60	8420	dbank_008420	-9.2	86567195	DB14785	664.811	664.349	9	C37H44N8O4	Fenebrutinib	investigational	investigational
61	8442	dbank_008442	-9.2	58507717	DB14846	411.389	411.163	9	C17H20F3N7O2	Bimiralisib	investigational	investigational
62	8524	dbank_008524	-9.2	42639643	DB15039	507.573	507.218	6	C29H26FN7O	ITI-214	investigational	investigational
63	429	dbank_000429	-9.1	5291	DB00619	493.603	493.259	7	C29H31N7O	Imatinib	approved	approved
64	911	dbank_000911	-9.1	42890	DB01177	497.494	497.169	10	C26H27NO9	Idarubicin	approved	approved
65	1339	dbank_001339	-9.1	447721	DB01761	506.565	506.241	5	C28H29F3N6	4-[5-[2-(1-Phenyl-Ethylamino)-Pyrimidin-4-Yl]-1-Methyl-4-(3-Trifluoromethylphenyl)-1h-Imidazol-2-Yl]-Piperidine	experimental	experimental
66	1611	dbank_001611	-9.1	448062	DB02112	489.611	489.253	5	C31H31N5O	Zk-806450	experimental	experimental
67	2745	dbank_002745	-9.1	5289321	DB03583	441.5	441.136	6	C22H23N3O5S	(2E,3S)-3-hydroxy-5'-[(4-hydroxypiperidin-1-yl)sulfonyl]-3-methyl-1,3-dihydro-2,3'-biindol-2'(1'H)-one	experimental	experimental
68	2917	dbank_002917	-9.1	5287617	DB03802	439.592	439.262	4	C29H33N3O	1-[4-(Octahydro-Pyrido[1,2-a]Pyrazin-2-Yl)-Phenyl]-2-Phenyl-1,2,3,4-Tetrahydro-Isoquinolin-6-Ol	experimental	experimental
69	4124	dbank_004124	-9.1	9932888	DB06469	439.471	439.153	4	C26H21N3O4	Lestaurtinib	investigational	investigational
70	4196	dbank_004196	-9.1	11635763	DB06638	604.686	604.26	8	C35H33FN6O3	Quarfloxin	investigational	investigational
71	5318	dbank_005318	-9.1	11633167	DB07994	421.494	421.19	5	C26H23N5O	N~3~-[5-(1H-INDOL-6-YL)-2-(PYRIDIN-2-YLMETHOXY)BENZYL]PYRIDINE-2,3-DIAMINE	experimental	experimental
72	5352	dbank_005352	-9.1	11987832	DB08031	446.538	446.221	4	C27H30N2O4	N-[(13-CYCLOHEXYL-6,7-DIHYDROINDOLO[1,2-D][1,4]BENZOXAZEPIN-10-YL)CARBONYL]-2-METHYL-L-ALANINE	experimental	experimental
73	6571	dbank_006571	-9.1	5282430	DB11577	422.389	421.988	10	C16H10N2O8S2	Indigotindisulfonic acid	approved	approved
74	6584	dbank_006584	-9.1	11965427	DB11611	615.48	614.068	6	C29H24Cl2N2O7S	Lifitegrast	approved	approved
75	6684	dbank_006684	-9.1	56599306	DB11772	541.02	540.135	8	C25H25ClN6O4S	Pilaralisib	investigational	investigational
76	6852	dbank_006852	-9.1	24771824	DB12012	455.441	455.157	4	C23H20F3N5O2	PF-04457845	investigational	investigational
77	8183	dbank_008183	-9.1	22609888	DB13993	397.39	397.146	6	C19H17F2N7O	MRK-409	experimental	experimental
78	8480	dbank_008480	-9.1	121596701	DB14917	412.51	412.168	7	C20H24N6O2S	Ceralasertib	investigational	investigational
79	8498	dbank_008498	-9.1	76283707	DB14946	635.66	635.203	7	C29H32F3N5O6S	PCO-371	investigational	investigational
80	8499	dbank_008499	-9.1	53262401	DB14982	432.531	432.206	5	C27H24N6	Miransertib	investigational	investigational
81	8641	dbank_008641	-9.1	59534386	DB15269	512.05	511.235	5	C27H34ClN5O3	ALK-4290	investigational	investigational
82	8692	dbank_008692	-9.1	42636651	DB15367	527.6	527.233	5	C30H30FN5O3	LY-2623091	investigational	investigational
83	1527	dbank_001527	-9	44259	DB02010	466.531	466.2	4	C28H26N4O3	Staurosporine	experimental	experimental
84	2217	dbank_002217	-9	6323416	DB02882	364.452	364.169	4	C24H20N4	Cyanocinnoline	experimental	experimental
85	2356	dbank_002356	-9	657141	DB03067	586.463	586.097	10	C28H18N4O11	4-{2,4-Bis[(3-Nitrobenzoyl)Amino]Phenoxy}Phthalic Acid	experimental	experimental
86	3641	dbank_003641	-9	4369496	DB04739	479.576	479.243	7	C28H29N7O	4-[(4-METHYL-1-PIPERAZINYL)METHYL]-N-[3-[[4-(3-PYRIDINYL)-2-PYRIMIDINYL]AMINO]PHENYL]-BENZAMIDE	experimental	experimental
87	4053	dbank_004053	-9	3035016	DB06263	483.473	483.153	10	C25H25NO9	Amrubicin	investigational	investigational
88	4413	dbank_004413	-9	24941249	DB06963	399.488	399.206	4	C24H25N5O	3-[3-(3-methyl-6-{[(1S)-1-phenylethyl]amino}-1H-pyrazolo[4,3-c]pyridin-1-yl)phenyl]propanamide	experimental	experimental
[truncated: 1,457 more rows]

## Sheet: analysis1
id	q1	Expr1001
1	approved	95
2	approved; experimental	4
3	approved; experimental; investigational	1
[truncated: 28 more rows]

## Sheet: analysis2
Id	Type	Count
[truncated: 8 more rows]
